# Supplementary material for: Estimating system parameters for solvent–water and plant cuticle–water using quantum chemically estimated Abraham solute parameters
Source: Royal Society of Chemistry journal article supplement (doi:10.1039/c7em00601b), 2018-01-01
Supplement: c7em00601b1.zip [file c7em00601b1.zip]

## Sheet: Title page
							Appendix A. Supplementary data
							for
								Estimating System Parameters for Solvent-Water and Plant Cuticle-Water Using Quantum Chemically Estimated Abraham Solute Parameters
							Yuzhen Liangabc, Tifany L. Torrala-Sanchezcd, Dominic M. Di Toroc*
		a South China University of Technology, Guangzhou, Guangdong 510006, China
		b The Key Lab of Pollution Control and Ecosystem Restoration in Industry Clusters, Ministry of Education, South China University of Technology, Guangzhou, Guangdong 510006, People’s Republic of China
		c University of Delaware, Newark, Delaware, US 19716
		d Current affiliation: Institute of Environmental Health, Oregon Health & Science University, Portland, Oregon 97239, USA
		Corresponding author: Dr. Dominic M. Di Toro; Telephone: 1-302-831-4092; Fax: 1-302-831-3640; Email: dditoro@udel.edu
CONTENTS
Table S1. Experimental and calculated solvent-water partition coefficients, and the ABSOLV, QSPR, and QCAP solute parameters.
Table S2. Refitted system parameters determined using QCAP solute parameters.
Table S3. Refitted system parameters determined using ABSOLV solute parameters.
Table S4. Refitted system parameters determined using QSPR solute parameters.
Table S5. Summary of the RMSEs of calculations of solvent-water partition coefficients.
Table S6. Experimental and calculated solvent-water partition coefficients, together with estimated solute parameters, for munition constituents and munition-like compounds.
Table S7. Experimental and calculated plant cuticle-water partition coefficients, together with estimated solute parameters.
Fig. S1. Dot plot presenting the root mean square errors (RMSEs) of the residuals (log calculated - log observed partition coefficients) for solvent-water systems ordered by the number of solutes in each system.
Fig. S2. Predicted versus observed partition coefficients for wet octanol-water.
Fig. S3. Pairs plot of QCAP solute parameters.
Fig. S4. Pairs plot of the adjusted QCAP solute parameters.
Discussion: Comparison of refitted models based on QCAP and adjusted QCAP solute parameters.

## Sheet: Table S1 
Tables S1. Experimental and predicted solvent-water partition coefficients, and the ABSOLV, QSPR, and QCAP solute parameters.
COSMO-SAC number	COSMO-SAC number	Name	Name	CAS	Formula	Phase	log K					Quantum chemically estimated Abraham solute parameters (QCAP)					ABSOLV					QSPR					QSPR solute parameter statistics
Solute	Solvent	Solute	Solvent	Solute	Solute	Dry/Wet	Observed	ABSOLV	QCAP	ABSOLV-SP	QCAP-SP	E	S	A	B	V	E	S	A	B	V	E	S	A	B	V	CSSE	>%E	levE	warningE	warn levelE	CSSS	>%s	levS	warningS	warn levelS	CSSA	>%A	levA	warningA	warnlevelA	CSSB	>%B	levB	warningB	warn levelB
1051	110	METHANE	Methanol	000074-82-8	CH4	dry	1.19	1.047	1.329	0.845	1.142	0.516	0.15	0.035	-0.042	0.228	0.11	0.21	0	0.01	0.25	0	0	0	0	0.2495	0	0	0	no fragment overlap	0	0	0	0	no fragment overlap	0	0	0	0	no fragment overlap	0	0	0	0	no fragment overlap	0
316	110	2-METHYLPROPANE	Methanol	000075-28-5	C4H10	dry	2.77	2.364	2.795	2.158	2.642	0.773	0.127	0.044	-0.043	0.618	0.01	0.17	0	0.06	0.67	0	0	0	0	0.6722	0	0	0	no fragment overlap	0	0	0	0	no fragment overlap	0	0	0	0	no fragment overlap	0	0	0	0	no fragment overlap	0
134	110	PENTANE	Methanol	000109-66-0	C5H12	dry	3.36	2.927	3.351	2.807	3.214	0.876	0.106	0.049	-0.06	0.747	0	0.19	0	0.04	0.81	0	0	0	0	0.8131	0	0	0	no fragment overlap	0	0	0	0	no fragment overlap	0	0	0	0	no fragment overlap	0	0	0	0	no fragment overlap	0
468	110	NEOPENTANE	Methanol	000463-82-1	C5H12	dry	3.24	2.848	3.083	2.624	2.892	0.874	0.129	0.052	0.008	0.741	-0.01	0.12	0	0.07	0.81	0	0	0	0	0.8131	0	0	0	no fragment overlap	0	0	0	0	no fragment overlap	0	0	0	0	no fragment overlap	0	0	0	0	no fragment overlap	0
89	110	HEXANE	Methanol	000110-54-3	C6H14	dry	3.87	3.409	3.821	3.316	3.686	0.98	0.097	0.055	-0.055	0.875	0	0.19	0	0.04	0.95	0	0	0	0	0.954	0	0	0	no fragment overlap	0	0	0	0	no fragment overlap	0	0	0	0	no fragment overlap	0	0	0	0	no fragment overlap	0
91	110	HEPTANE	Methanol	000142-82-5	C7H16	dry	4.46	3.89	4.26	3.825	4.148	1.105	0.122	0.055	-0.049	1	0	0.2	0	0.05	1.09	0	0	0	0	1.0949	0	0	0	no fragment overlap	0	0	0	0	no fragment overlap	0	0	0	0	no fragment overlap	0	0	0	0	no fragment overlap	0
74	110	2,4-DIMETHYLPENTANE	Methanol	000108-08-7	C7H16	dry	4.268	3.727	4.011	3.545	3.829	1.061	0.115	0.06	0.017	0.995	0.02	0.16	0	0.1	1.09	0	0	0	0	1.0949	0	0	0	no fragment overlap	0	0	0	0	no fragment overlap	0	0	0	0	no fragment overlap	0	0	0	0	no fragment overlap	0
128	110	OCTANE	Methanol	000111-65-9	C8H18	dry	4.93	4.372	4.784	4.334	4.702	1.191	0.126	0.058	-0.057	1.135	0	0.2	0	0.05	1.24	0	0	0	0	1.2358	0	0	0	no fragment overlap	0	0	0	0	no fragment overlap	0	0	0	0	no fragment overlap	0	0	0	0	no fragment overlap	0
398	110	NONANE	Methanol	000111-84-2	C9H20	dry	5.38	4.85	5.216	4.838	5.155	1.328	0.153	0.058	-0.05	1.258	-0.01	0.2	0	0.05	1.38	0	0	0	0	1.3767	0	0	0	no fragment overlap	0	0	0	0	no fragment overlap	0	0	0	0	no fragment overlap	0	0	0	0	no fragment overlap	0
2224	110	3,3-DIETHYLPENTANE	Methanol	001067-20-5	C9H20	dry	4.78	4.774	4.513	4.66	4.338	1.219	0.206	0.056	0.105	1.227	-0.02	0.14	0	0.09	1.38	0	-0.45	0	0	1.3767	0	0	0	no fragment overlap	0	0	0	0.2013	out of domain structural outlier	2	0	0	0	no fragment overlap	0	0	0	0	no fragment overlap	0
401	110	ETHYLCYCLOHEXANE	Methanol	001678-91-7	C8H16	dry	4.541	3.994	4.212	3.929	4.093	1.189	0.18	0.044	-0.003	1.035	0.22	0.27	0	0.05	1.13	0.26	0.18	0	0	1.1272	0.6786	58.3	0.003		0	0.5193	29.6	0.0021		0	0	0	0	no fragment overlap	0	0	0	0	no fragment overlap	0
1053	110	ETHYLENE	Methanol	000074-85-1	C2H4	dry	1.35	1.219	1.381	0.939	1.267	0.621	0.325	0.044	0.022	0.329	0.1	0.19	0	0.07	0.35	0.12	0.11	0	0.07	0.3474	0.5931	40.1	0.0018		0	0.3517	14.4	0.0009	low similarity	1	0	0	0	no fragment overlap	0	0.6727	62.8	0.002		0
1055	110	PROPYLENE	Methanol	000115-07-1	C3H6	dry	1.92	1.639	1.835	1.391	1.729	0.74	0.33	0.039	0.029	0.456	0.13	0.24	0	0.08	0.49	0.12	0.11	0	0.07	0.4883	0.5931	40.1	0.0018		0	0.3517	14.4	0.0009	low similarity	1	0	0	0	no fragment overlap	0	0.6727	62.8	0.002		0
450	110	TRANS-2-BUTENE	Methanol	000624-64-6	C4H8	dry	2.43	2.062	2.386	1.847	2.281	0.863	0.3	0.041	0.018	0.586	0.16	0.28	0	0.1	0.63	0.16	0.11	0	0.07	0.6292	0.6665	54.7	0.0092		0	0.3517	14.4	0.0009	low similarity	1	0	0	0	no fragment overlap	0	0.6727	62.8	0.002		0
460	110	CIS-2-BUTENE	Methanol	000590-18-1	C4H8	dry	2.5	2.062	2.302	1.847	2.198	0.858	0.321	0.042	0.032	0.58	0.16	0.28	0	0.1	0.63	0.16	0.11	0	0.07	0.6292	0.6665	54.7	0.0092		0	0.3517	14.4	0.0009	low similarity	1	0	0	0	no fragment overlap	0	0.6727	62.8	0.002		0
364	110	1,3-BUTADIENE	Methanol	000106-99-0	C4H6	dry	2.02	1.795	1.991	1.502	1.937	1.041	0.495	0.064	0.079	0.554	0.25	0.3	0	0.14	0.59	0.23	0.23	0	0.14	0.5862	0.4203	17.4	0.0071	low similarity	1	0.746	61.9	0.0037		0	0	0	0	no fragment overlap	0	0.7461	74.9	0.0081		0
1064	110	ETHYNE	Methanol	000074-86-2	C2H2	dry	1.04	1.006	0.898	0.923	0.912	0.508	0.582	0.226	0.082	0.304	0.36	0.39	0.17	0.07	0.3	0.15	0.24	0.05	0.05	0.3044	0.8229	85	0.0332		0	0.7665	67.2	0.0115		0	0.2134	32.2	0.011		0	0.4484	26.2	0.0202		0
1014	110	TETRAFLUOROMETHANE[R14]	Methanol	000075-73-0	CF4	dry	1.56	1.332	2.319	1.12	2.179	-0.006	-0.061	0.046	-0.133	0.426	-0.47	-0.03	0	0	0.32	-0.49	-0.42	0	0	0.3203	0.6313	47.7	0.2027	high leverage	1	0.0106	0.1	0.2389	out of domain structural outlier	2	0	0	0	no fragment overlap	0	0	0	0	no fragment overlap	0
321	110	ETHYLCHLORIDE	Methanol	000075-00-3	C2H5Cl	dry	1.47	1.859	1.643	1.767	1.576	0.689	0.456	0.053	0.095	0.493	0.13	0.32	0	0.03	0.51	0.2	0.32	0	0	0.5128	0.7377	69.2	0.0066		0	0.7947	71.2	0.0103		0	0	0	0	no fragment overlap	0	0	0	0	no fragment overlap	0
47	110	CHLOROFORM	Methanol	000067-66-3	CHCl3	dry	2.31	2.264	2.427	2.395	2.51	0.81	0.521	0.172	0.005	0.629	0.34	0.48	0.12	0	0.62	0.39	0.45	0	0	0.6167	0.6073	43.5	0.0197		0	0.578	36.6	0.0035		0	0	0	0	no fragment overlap	0	0	0	0	no fragment overlap	0
157	110	TETRACHLOROMETHANE	Methanol	000056-23-5	CCl4	dry	2.72	2.68	3.131	2.793	3.088	0.926	0.298	0.067	-0.016	0.759	0.42	0.55	0	0	0.74	0.52	0.6	0	0	0.7391	0.4857	24.2	0.0349	low similarity	1	0.6167	41.8	0.0062		0	0	0	0	no fragment overlap	0	0	0	0	no fragment overlap	0
1091	110	1,1-DICHLOROETHENE	Methanol	000075-35-4	C2H2Cl2	dry	2.34	1.881	2.424	1.757	2.403	0.847	0.38	0.096	-0.005	0.59	0.35	0.46	0	0.1	0.59	0.37	0.41	0	0.07	0.5922	0.7386	69.6	0.0098		0	0.6924	52.8	0.0025		0	0	0	0	no fragment overlap	0	0.6727	62.8	0.002		0
911	110	1,1-DIFLUOROETHANE	Methanol	000075-37-6	C2H4F2	dry	1.32	1.712	1.291	1.609	1.255	0.307	0.487	0.106	0.125	0.459	-0.22	0.08	0.09	0	0.43	-0.2	0	0	0	0.4258	0.5724	36.2	0.0116		0	0	0	0	no fragment overlap	0	0	0	0	no fragment overlap	0	0	0	0	no fragment overlap	0
580	110	DIMETHYLETHER	Methanol	000115-10-6	C2H6O	dry	0.29	0.879	0.796	0.473	0.531	0.572	0.432	0.018	0.271	0.428	0.05	0.33	0	0.24	0.45	0	0.28	0	0.24	0.4491	0	0	0	no fragment overlap	0	0.7078	55.3	0.0125		0	0	0	0	no fragment overlap	0	0.2	5	0.014	low similarity	1
12	110	DIETHYLETHER	Methanol	000060-29-7	C4H10O	dry	1.11	1.842	1.849	1.491	1.575	0.764	0.367	0.029	0.262	0.69	0.04	0.34	0	0.25	0.73	0	0.26	0	0.51	0.7309	0	0	0	no fragment overlap	0	0.7658	66.6	0.0255		0	0	0	0	no fragment overlap	0	0	0	0.3439	out of domain structural outlier	2
338	110	DIPROPYLETHER	Methanol	000111-43-3	C6H14O	dry	2	2.802	2.782	2.504	2.529	0.978	0.366	0.034	0.267	0.942	0.04	0.35	0	0.25	1.01	0	0.18	0	0.34	1.0127	0	0	0	no fragment overlap	0	0.7709	68	0.0121		0	0	0	0	no fragment overlap	0	0.4954	33.1	0.005		0
57	110	DIBUTYLETHER	Methanol	000142-96-1	C8H18O	dry	2.95	3.765	3.743	3.522	3.54	1.189	0.394	0.035	0.266	1.202	0.04	0.35	0	0.26	1.29	0	0.18	0	0.41	1.2945	0	0	0	no fragment overlap	0	0.7709	68	0.0121		0	0	0	0	no fragment overlap	0	0.7666	78.4	0.0424		0
876	110	METHYLTERT-AMYLETHER	Methanol	000994-05-8	C6H14O	dry	1.46	2.727	2.328	2.327	1.993	0.912	0.402	0.048	0.376	0.93	0.02	0.28	0	0.29	1.01	0	0.14	0	0.22	1.0127	0	0	0	no fragment overlap	0	0.6134	41.2	0.0031		0	0	0	0	no fragment overlap	0	0	0	0.0035	out of domain	2
399	110	PROPANAL	Methanol	000123-38-6	C3H6O	dry	0.27	0.746	0.605	0.508	0.386	0.605	0.633	0.025	0.386	0.52	0.24	0.73	0	0.32	0.55	0.17	0.63	0	0.46	0.547	0.4992	26	0.0159		0	0.9083	90.7	0.0221		0	0	0	0	no fragment overlap	0	0.9763	100	0.1445	high leverage	1
313	110	BUTANAL	Methanol	000123-72-8	C4H8O	dry	0.85	1.227	1.051	1.017	0.845	0.714	0.641	0.025	0.391	0.644	0.24	0.73	0	0.32	0.69	0.17	0.63	0	0.46	0.6879	0.4992	26	0.0159		0	0.9083	90.7	0.0221		0	0	0	0	no fragment overlap	0	0.9763	100	0.1445	high leverage	1
753	110	PENTANAL	Methanol	000110-62-3	C5H10O	dry	1.35	1.708	1.529	1.526	1.34	0.823	0.654	0.022	0.398	0.78	0.23	0.74	0	0.33	0.83	0.17	0.63	0	0.46	0.8288	0.4992	26	0.0159		0	0.9083	90.7	0.0221		0	0	0	0	no fragment overlap	0	0.9763	100	0.1445	high leverage	1
4	110	ACETONE	Methanol	000067-64-1	C3H6O	dry	0.06	0.723	0.208	0.421	-0.061	0.63	0.712	0.046	0.485	0.515	0.22	0.67	0	0.34	0.55	0.12	0.64	0	0.5	0.547	0.5931	40.1	0.0018		0	0.6565	47.5	0.0268		0	0	0	0	no fragment overlap	0	0.334	13	0.0452	low similarity	1
40	110	2-BUTANONE	Methanol	000078-93-3	C4H8O	dry	0.62	1.205	0.807	0.93	0.552	0.692	0.668	0.033	0.461	0.649	0.21	0.67	0	0.34	0.69	0.12	0.63	0	0.48	0.6879	0.5931	40.1	0.0018		0	0.891	87.7	0.0084		0	0	0	0	no fragment overlap	0	0.4432	25.5	0.0579		0
616	110	METHYLBUTYLKETONE	Methanol	000591-78-6	C6H12O	dry	1.41	2.168	1.741	1.948	1.516	0.903	0.681	0.035	0.467	0.905	0.21	0.68	0	0.35	0.97	0.12	0.63	0	0.5	0.9697	0.5931	40.1	0.0018		0	0.891	87.7	0.0084		0	0	0	0	no fragment overlap	0	0.9604	99	0.0156		0
92	110	2-HEPTANONE	Methanol	000110-43-0	C7H14O	dry	2.13	2.649	2.215	2.457	2.017	1.022	0.696	0.039	0.463	1.029	0.21	0.69	0	0.35	1.11	0.08	0.63	0	0.5	1.1106	0.3755	14	0.0344	low similarity	1	0.891	87.7	0.0084		0	0	0	0	no fragment overlap	0	0.9604	99	0.0156		0
287	110	4-HEPTANONE	Methanol	000123-19-3	C7H14O	dry	2.05	2.649	2.3	2.457	2.088	1.008	0.649	0.031	0.444	1.027	0.21	0.69	0	0.35	1.11	0.23	0.62	0	0.51	1.1106	0	0	0.0616	out of domain	2	0.4682	24.4	0.0083	low similarity	1	0	0	0	no fragment overlap	0	0.7542	76.5	0.0303		0
82	110	METHYLACETATE	Methanol	000079-20-9	C3H6O2	dry	0.62	0.873	0.538	0.506	0.366	0.57	0.757	0.044	0.446	0.585	0.07	0.57	0	0.36	0.61	0.11	0.61	0	0.4	0.6057	0.631	47.6	0.0298		0	0.6969	53.3	0.0096		0	0	0	0	no fragment overlap	0	0.5298	38.1	0.0225		0
80	110	BUTYLACETATE	Methanol	000123-86-4	C6H12O2	dry	1.99	2.31	2.05	2.024	1.895	0.85	0.703	0.033	0.437	0.973	0.06	0.59	0	0.37	1.03	0.07	0.57	0	0.46	1.0284	0.8503	90.3	0.0205		0	0.9448	96.5	0.0095		0	0	0	0	no fragment overlap	0	0.8152	85.1	0.0324		0
400	110	METHYLPROPIONATE	Methanol	000554-12-1	C4H8O2	dry	1.02	1.351	0.949	1.01	0.753	0.653	0.734	0.033	0.469	0.713	0.07	0.58	0	0.36	0.75	0.09	0.6	0	0.44	0.7466	0.4929	25.2	0.0079		0	0.9361	95.5	0.0047		0	0	0	0	no fragment overlap	0	0.4969	33.4	0.0519		0
720	110	METHYLBUTANOATE	Methanol	000623-42-7	C5H10O2	dry	1.47	1.833	1.532	1.519	1.37	0.77	0.723	0.034	0.441	0.84	0.07	0.58	0	0.37	0.89	0.09	0.6	0	0.46	0.8875	0.4929	25.2	0.0079		0	0.9361	95.5	0.0047		0	0	0	0	no fragment overlap	0	0.9413	96.8	0.0122		0
216	110	METHYLPENTANOATE	Methanol	000624-24-8	C6H12O2	dry	2.03	2.31	2.008	2.024	1.878	0.87	0.744	0.032	0.439	0.969	0.06	0.59	0	0.37	1.03	0.09	0.6	0	0.46	1.0284	0.4929	25.2	0.0079		0	0.9361	95.5	0.0047		0	0	0	0	no fragment overlap	0	0.9413	96.8	0.0122		0
686	110	METHYLCAPROATE	Methanol	000106-70-7	C7H14O2	dry	2.45	2.792	2.475	2.533	2.371	0.997	0.764	0.032	0.438	1.094	0.06	0.59	0	0.37	1.17	0.05	0.6	0	0.46	1.1693	0.411	16.5	0.0404	low similarity	1	0.9361	95.5	0.0047		0	0	0	0	no fragment overlap	0	0.9413	96.8	0.0122		0
3	110	ACETONITRILE	Methanol	000075-05-8	C2H3N	dry	0.11	0.635	-0.113	0.564	-0.232	0.504	0.837	0.106	0.417	0.391	0.19	0.72	0	0.2	0.4	0.17	0.56	0.05	0.18	0.4042	0.8597	91.7	0.0113		0	0.2974	9.7	0.0109	low similarity	1	0.2134	32.2	0.011		0	0.4544	26.8	0.0194		0
326	110	PROPIONITRILE	Methanol	000107-12-0	C3H5N	dry	0.79	1.117	0.391	1.073	0.232	0.598	0.767	0.06	0.422	0.519	0.19	0.73	0	0.2	0.55	0.17	0.56	0.05	0.3	0.5451	0.8597	91.7	0.0113		0	0.2974	9.7	0.0109	low similarity	1	0.2134	32.2	0.011		0	0.7429	73.4	0.0382		0
179	110	DIMETHYLAMINE	Methanol	000124-40-3	C2H7N	dry	-0.58	0.283	0.77	-0.388	0.322	0.668	0.311	0.179	0.343	0.455	0.16	0.34	0.13	0.47	0.49	0.17	0.32	0.21	0.53	0.4902	0.2386	5.8	0.0025	low similarity	1	0.6992	53.5	0.0019		0	0.0009	0.3	0.3082	out of domain structural outlier	2	0.2127	5.5	0.1791	high leverage low similarity	1
61	110	DIETHYLAMINE	Methanol	000109-89-7	C4H11N	dry	0.74	1.243	1.886	0.624	1.481	0.867	0.277	0.165	0.308	0.716	0.15	0.35	0.13	0.48	0.77	0.17	0.32	0.02	0.59	0.772	0.2386	5.8	0.0025	low similarity	1	0.6992	53.5	0.0019		0	0.3635	48.3	0.4003	structural outlier	2	0.3023	10.8	0.0392	low similarity	1
110	110	METHANOL	Methanol	000067-56-1	CH4O	dry	-0.14	0.175	-0.096	-0.082	-0.436	0.473	0.549	0.586	0.378	0.295	0.21	0.44	0.31	0.3	0.31	0.19	0.28	0.31	0.2	0.3082	0.0194	1.9	0.0022	out of domain	2	0.2446	7.5	0.0017	low similarity	1	0	0	0.0086	out of domain	2	0	0	0.0014	out of domain	2
11	110	ETHANOL	Methanol	000064-17-5	C2H6O	dry	0.22	0.657	0.356	0.427	0	0.564	0.522	0.562	0.391	0.424	0.21	0.45	0.31	0.31	0.45	0.19	0.37	0.33	0.33	0.4491	0.0194	1.9	0.0022	out of domain	2	0.8374	76.4	0.0078		0	0.296	43.7	0.034		0	0.3233	12.3	0.0151	low similarity	1
140	110	1-PROPANOL	Methanol	000071-23-8	C3H8O	dry	0.8	1.138	0.779	0.936	0.439	0.643	0.538	0.528	0.406	0.556	0.21	0.45	0.31	0.31	0.59	0.19	0.37	0.33	0.39	0.59	0.0194	1.9	0.0022	out of domain	2	0.8374	76.4	0.0078		0	0.296	43.7	0.034		0	0.3558	14.6	0.0213	low similarity	1
39	110	1-BUTANOL	Methanol	000071-36-3	C4H10O	dry	1.1	1.62	1.256	1.445	0.913	0.75	0.524	0.567	0.409	0.682	0.2	0.46	0.31	0.31	0.73	0.19	0.37	0.36	0.47	0.7309	0.0194	1.9	0.0022	out of domain	2	0.8374	76.4	0.0078		0	0.4208	54.5	0.0196		0	0.9246	94.4	0.0188		0
136	110	1-PENTANOL	Methanol	000071-41-0	C5H12O	dry	1.58	2.101	1.776	1.953	1.47	0.841	0.536	0.566	0.398	0.814	0.2	0.46	0.31	0.32	0.87	0.19	0.47	0.36	0.47	0.8718	0.0194	1.9	0.0022	out of domain	2	0.8971	89.3	0.0182		0	0.4208	54.5	0.0196		0	0.9246	94.4	0.0188		0
296	110	1-HEXANOL	Methanol	000111-27-3	C6H14O	dry	2.06	2.583	2.171	2.462	1.878	0.948	0.56	0.535	0.418	0.942	0.2	0.46	0.31	0.32	1.01	0.19	0.47	0.36	0.47	1.0127	0.0194	1.9	0.0022	out of domain	2	0.8971	89.3	0.0182		0	0.4208	54.5	0.0196		0	0.9246	94.4	0.0188		0
343	110	1-HEPTANOL	Methanol	000111-70-6	C7H16O	dry	2.48	3.064	2.73	2.971	2.47	1.055	0.56	0.569	0.398	1.072	0.2	0.47	0.31	0.32	1.15	0.19	0.47	0.36	0.47	1.1536	0.0194	1.9	0.0022	out of domain	2	0.8971	89.3	0.0182		0	0.4208	54.5	0.0196		0	0.9246	94.4	0.0188		0
344	110	1-OCTANOL	Methanol	000111-87-5	C8H18O	dry	2.89	3.542	3.219	3.475	2.976	1.161	0.565	0.572	0.398	1.203	0.2	0.47	0.31	0.32	1.29	0.19	0.47	0.36	0.47	1.2945	0.0194	1.9	0.0022	out of domain	2	0.8971	89.3	0.0182		0	0.4208	54.5	0.0196		0	0.9246	94.4	0.0188		0
127	110	1-NONANOL	Methanol	000143-08-8	C9H20O	dry	3.4	4.02	3.645	3.98	3.426	1.267	0.593	0.536	0.412	1.335	0.2	0.48	0.31	0.33	1.44	0.19	0.47	0.36	0.47	1.4354	0.0194	1.9	0.0022	out of domain	2	0.8971	89.3	0.0182		0	0.4208	54.5	0.0196		0	0.9246	94.4	0.0188		0
1795	110	2,2,2-TRIFLUOROETHANOL	Methanol	000075-89-8	C2H3F3O	dry	1.03	1.256	1.54	1.331	1.557	0.159	0.607	0.964	0.15	0.57	-0.15	0.28	0.54	0.19	0.5	-0.13	0.26	0.41	0.33	0.5022	0.315	10.1	0.0139	low similarity	1	0.5287	31.1	0.0223		0	0.2417	35.7	0.0598	high leverage	1	0.3233	12.3	0.0151	low similarity	1
30972	110	ETHYL-MERCAPTAN	Methanol	000075-08-1	C2H6S	dry	1.36	1.672	1.65	1.367	1.596	0.856	0.543	0.059	0.133	0.534	0.46	0.37	0	0.14	0.55	0.38	0.39	0	0.21	0.5539	0.7944	80.5	0.0455		0	0.7613	64.4	0.0421		0	0	0	0	no fragment overlap	0	0.806	84.2	0.0648		0
31	110	BENZENE	Methanol	000071-43-2	C6H6	dry	2.14	2.156	2.305	2.164	2.313	1.173	0.598	0.059	0.102	0.674	0.56	0.69	0	0.12	0.72	0.58	0.6	0	0.13	0.7164	0.3858	14.7	0.0092	low similarity	1	0.7874	70.4	0.0024		0	0	0	0	no fragment overlap	0	0.6062	49.6	0.0039		0
161	110	TOLUENE	Methanol	000108-88-3	C7H8	dry	2.54	2.694	2.727	2.676	2.73	1.315	0.606	0.056	0.121	0.802	0.58	0.63	0	0.12	0.86	0.63	0.62	0	0.16	0.8573	0.5953	40.7	0.0035		0	0.8573	81	0.0021		0	0	0	0	no fragment overlap	0	0.7763	79.5	0.0029		0
25	110	ETHYLBENZENE	Methanol	000100-41-4	C8H10	dry	3	3.175	3.16	3.185	3.171	1.428	0.614	0.054	0.132	0.928	0.58	0.64	0	0.12	1	0.63	0.48	0	0.17	0.9982	0.5953	40.7	0.0035		0	0.942	96.3	0.011		0	0	0	0	no fragment overlap	0	0.8392	87.5	0.0042		0
369	110	PROPYLBENZENE	Methanol	000103-65-1	C9H12	dry	3.52	3.657	3.616	3.694	3.64	1.552	0.623	0.052	0.136	1.053	0.58	0.64	0	0.12	1.14	0.63	0.48	0	0.17	1.1391	0.5953	40.7	0.0035		0	0.942	96.3	0.011		0	0	0	0	no fragment overlap	0	0.8392	87.5	0.0042		0
763	110	TERT-BUTYLBENZENE	Methanol	000098-06-6	C10H14	dry	3.73	4.06	3.746	4.02	3.718	1.651	0.653	0.062	0.217	1.165	0.56	0.58	0	0.16	1.28	0.61	0.56	0	0.18	1.28	0.6677	54.8	0.0108		0	0.7188	57.2	0.0234		0	0	0	0	no fragment overlap	0	0.5914	47.4	0.0204		0
954	110	HEXYLBENZENE	Methanol	001077-16-3	C12H18	dry	5.2	5.102	5.074	5.221	5.166	1.893	0.66	0.056	0.136	1.446	0.57	0.66	0	0.13	1.56	0.63	0.48	0	0.17	1.5618	0.5953	40.7	0.0035		0	0.942	96.3	0.011		0	0	0	0	no fragment overlap	0	0.8392	87.5	0.0042		0
27	110	CHLOROBENZENE	Methanol	000108-90-7	C6H5Cl	dry	2.85	2.588	2.778	2.653	2.854	1.34	0.677	0.09	0.097	0.804	0.7	0.77	0	0.11	0.84	0.74	0.68	0	0.09	0.8388	0.7554	72.9	0.0041		0	0.8062	72.4	0.0016		0	0	0	0	no fragment overlap	0	0.822	85.8	0.0018		0
471	110	BIPHENYL	Methanol	000092-52-4	C12H10	dry	3.83	3.895	3.722	4.042	3.897	2.339	1.096	0.088	0.267	1.232	1.39	1.16	0	0.21	1.32	1.32	1.07	0	0.27	1.3242	0.5679	35.5	0.0134		0	0.8607	81.2	0.006		0	0	0	0	no fragment overlap	0	0.6182	52.1	0.0119		0
123	110	NAPHTHALENE	Methanol	000091-20-3	C10H8	dry	3.38	3.253	3.212	3.323	3.327	2.055	0.936	0.077	0.202	1.018	1.27	1.02	0	0.17	1.09	1.28	0.93	0	0.18	1.0854	0.4324	18.5	0.0099	low similarity	1	0.7946	71.1	0.0038		0	0	0	0	no fragment overlap	0	0.6351	55.2	0.007		0
1169	110	ACENAPHTHYLENE-1,2-DIHYDRO	Methanol	000083-32-9	C12H10	dry	3.66	4.035	3.728	4.086	3.817	2.33	0.96	0.055	0.247	1.19	1.53	0.99	0	0.15	1.26	1.58	1.07	0	0.27	1.2586	0.6334	47.9	0.1371	high leverage	1	0.6768	50.5	0.0085		0	0	0	0	no fragment overlap	0	0.7471	75.1	0.0146		0
1183	110	FLUORANTHENE	Methanol	000206-44-0	C16H10	dry	4.733	4.804	4.457	4.922	4.645	3.527	1.389	0.112	0.37	1.495	2.6	1.52	0	0.25	1.58	2.27	1.53	0	0.32	1.5846	0.1058	2.8	0.3054	out of domain structural outlier	2	0.5354	31.6	0.0121		0	0	0	0	no fragment overlap	0	0.4466	25.9	0.0269		0
927	110	PHENANTHRENE	Methanol	000085-01-8	C14H10	dry	4.44	4.346	4.073	4.478	4.251	3.016	1.258	0.111	0.321	1.357	1.99	1.34	0	0.23	1.45	2.07	1.25	0	0.22	1.4544	0.6251	46.3	0.1686	high leverage	1	0.6533	47.1	0.007		0	0	0	0	no fragment overlap	0	0.6043	49.3	0.011		0
387	110	1,2,4,5-TETRAMETHYLBENZENE	Methanol	000095-93-2	C10H14	dry	4.001	4.31	3.967	4.217	3.963	1.757	0.638	0.05	0.173	1.174	0.65	0.46	0	0.12	1.28	0.72	0.65	0	0.35	1.28	0.7406	70.1	0.0066		0	0.6885	52.1	0.0171		0	0	0	0	no fragment overlap	0	0.4189	22.2	0.0813	low similarity	1
1181	110	9H-FLUORENE	Methanol	000086-73-7	C13H10	dry	4.037	4.196	3.767	4.296	3.924	2.587	1.163	0.082	0.311	1.279	1.65	1.13	0	0.19	1.36	1.69	1.16	0	0.37	1.3565	0.3057	9.5	0.5967	structural outlier	2	0.6605	48.1	0.0851	high leverage	1	0	0	0	no fragment overlap	0	0.4173	22	0.0204	low similarity	1
5441	110	MONURON	Methanol	000150-68-5	C9H11ClN2O	dry	2.417	1.988	2.809	1.859	2.84	2.143	1.361	0.419	0.63	1.382	1.16	1.59	0.37	0.84	1.48	1.29	1.5	0.38	0.84	1.4768	0.7036	62.8	0.0547		0	0.638	45.1	0.0507		0	0.0686	5.8	0.0165	low similarity	1	0.7017	67.8	0.0455		0
5954	110	PHENACETIN	Methanol	000062-44-2	C10H13NO2	dry	1.967	1.753	2.254	1.611	2.161	2.007	1.37	0.497	0.765	1.366	0.96	1.55	0.41	0.87	1.45	0.93	1.4	0.38	0.8	1.4542	0.8758	94.1	0.1723	high leverage	1	0.7026	54.5	0.1019	high leverage	1	0.0686	5.8	0.0165	low similarity	1	0.7315	71.7	0.0291		0
6465	110	ACETAMINOPHEN	Methanol	000103-90-2	C8H9NO2	dry	1.288	0.582	1.432	0.692	1.29	1.657	1.339	1.281	0.732	1.106	1.12	1.66	0.91	0.93	1.17	1.07	1.82	0.91	0.75	1.1724	0.7434	70.8	0.1979	high leverage	1	0.7737	68.4	0.1222	high leverage	1	0.0414	2.8	0.0603	out of domain	2	0.7903	82.1	0.0205		0
40086	110	Trimethoprim	Methanol	000738-70-5	C14H18N4O3	dry	1.488	1.25	1.745	0.853	1.197	2.863	1.918	0.915	1.604	2.053	2.04	2.81	0.45	1.62	2.18	2.14	2.62	0.55	1.74	2.1813	0.6533	52.1	0.0715		0	0.4964	27.6	0.1831	structural outlier	2	0	0	0.048	out of domain	2	0.3959	19.8	0.0772	low similarity	1
31045	110	TRIPHENYLPHOSPHINE	Methanol	000603-35-0	C18H15P	dry	5.285	5.676	5.331	5.303	5.594	3.718	1.675	0.11	0.581	1.986	1.82	1.15	0	0.57	2.14	2.07	1.6	0	0.64	2.1366	0.3963	15.3	0.1661	high leverage low similarity	1	0.4024	18.3	0.0134	low similarity	1	0	0	0	no fragment overlap	0	0.515	36.1	1	leverage > 1	3
5972	110	DIPHENYL-SULFONE	Methanol	000127-63-9	C12H10O2S	dry	2.719	2.493	2.685	2.59	2.735	2.327	1.549	0.124	0.769	1.508	1.26	2.01	0	0.74	1.61	1.49	2.02	0	0.77	1.6051	0.4724	23.2	0.0293	low similarity	1	0.4865	26.6	0.0247		0	0	0	0	no fragment overlap	0	0.6377	55.7	0.0197		0
1014	11	TETRAFLUOROMETHANE[R14]	Ethanol	000075-73-0	CF4	dry	1.57	1.301	2.431	1.17	2.42	-0.006	-0.061	0.046	-0.133	0.426	-0.47	-0.03	0	0	0.32	-0.49	-0.42	0	0	0.3203	0.6313	47.7	0.2027	high leverage	1	0.0106	0.1	0.2389	out of domain structural outlier	2	0	0	0	no fragment overlap	0	0	0	0	no fragment overlap	0
1051	11	METHANE	Ethanol	000074-82-8	CH4	dry	1.17	0.978	1.33	0.631	1.073	0.516	0.15	0.035	-0.042	0.228	0.11	0.21	0	0.01	0.25	0	0	0	0	0.2495	0	0	0	no fragment overlap	0	0	0	0	no fragment overlap	0	0	0	0	no fragment overlap	0	0	0	0	no fragment overlap	0
316	11	2-METHYLPROPANE	Ethanol	000075-28-5	C4H10	dry	2.9	2.46	2.995	2.367	2.823	0.773	0.127	0.044	-0.043	0.618	0.01	0.17	0	0.06	0.67	0	0	0	0	0.6722	0	0	0	no fragment overlap	0	0	0	0	no fragment overlap	0	0	0	0	no fragment overlap	0	0	0	0	no fragment overlap	0
134	11	PENTANE	Ethanol	000109-66-0	C5H12	dry	3.48	3.08	3.627	3.094	3.485	0.876	0.106	0.049	-0.06	0.747	0	0.19	0	0.04	0.81	0	0	0	0	0.8131	0	0	0	no fragment overlap	0	0	0	0	no fragment overlap	0	0	0	0	no fragment overlap	0	0	0	0	no fragment overlap	0
468	11	NEOPENTANE	Ethanol	000463-82-1	C5H12	dry	3.44	3.011	3.333	2.999	3.12	0.874	0.129	0.052	0.008	0.741	-0.01	0.12	0	0.07	0.81	0	0	0	0	0.8131	0	0	0	no fragment overlap	0	0	0	0	no fragment overlap	0	0	0	0	no fragment overlap	0	0	0	0	no fragment overlap	0
89	11	HEXANE	Ethanol	000110-54-3	C6H14	dry	4.06	3.619	4.164	3.717	4.033	0.98	0.097	0.055	-0.055	0.875	0	0.19	0	0.04	0.95	0	0	0	0	0.954	0	0	0	no fragment overlap	0	0	0	0	no fragment overlap	0	0	0	0	no fragment overlap	0	0	0	0	no fragment overlap	0
91	11	HEPTANE	Ethanol	000142-82-5	C7H16	dry	4.67	4.156	4.66	4.339	4.562	1.105	0.122	0.055	-0.049	1	0	0.2	0	0.05	1.09	0	0	0	0	1.0949	0	0	0	no fragment overlap	0	0	0	0	no fragment overlap	0	0	0	0	no fragment overlap	0	0	0	0	no fragment overlap	0
128	11	OCTANE	Ethanol	000111-65-9	C8H18	dry	5.28	4.695	5.251	4.961	5.205	1.191	0.126	0.058	-0.057	1.135	0	0.2	0	0.05	1.24	0	0	0	0	1.2358	0	0	0	no fragment overlap	0	0	0	0	no fragment overlap	0	0	0	0	no fragment overlap	0	0	0	0	no fragment overlap	0
398	11	NONANE	Ethanol	000111-84-2	C9H20	dry	5.82	5.229	5.739	5.58	5.72	1.328	0.153	0.058	-0.05	1.258	-0.01	0.2	0	0.05	1.38	0	0	0	0	1.3767	0	0	0	no fragment overlap	0	0	0	0	no fragment overlap	0	0	0	0	no fragment overlap	0	0	0	0	no fragment overlap	0
2224	11	3,3-DIETHYLPENTANE	Ethanol	001067-20-5	C9H20	dry	5.12	5.162	4.956	5.487	4.811	1.219	0.206	0.056	0.105	1.227	-0.02	0.14	0	0.09	1.38	0	-0.45	0	0	1.3767	0	0	0	no fragment overlap	0	0	0	0.2013	out of domain structural outlier	2	0	0	0	no fragment overlap	0	0	0	0	no fragment overlap	0
74	11	2,4-DIMETHYLPENTANE	Ethanol	000108-08-7	C7H16	dry	4.51	3.991	4.389	4.129	4.211	1.061	0.115	0.06	0.017	0.995	0.02	0.16	0	0.1	1.09	0	0	0	0	1.0949	0	0	0	no fragment overlap	0	0	0	0	no fragment overlap	0	0	0	0	no fragment overlap	0	0	0	0	no fragment overlap	0
401	11	ETHYLCYCLOHEXANE	Ethanol	001678-91-7	C8H16	dry	4.847	4.274	4.606	4.407	4.49	1.189	0.18	0.044	-0.003	1.035	0.22	0.27	0	0.05	1.13	0.26	0.18	0	0	1.1272	0.6786	58.3	0.003		0	0.5193	29.6	0.0021		0	0	0	0	no fragment overlap	0	0	0	0	no fragment overlap	0
1053	11	ETHYLENE	Ethanol	000074-85-1	C2H4	dry	1.35	1.181	1.371	0.865	1.199	0.621	0.325	0.044	0.022	0.329	0.1	0.19	0	0.07	0.35	0.12	0.11	0	0.07	0.3474	0.5931	40.1	0.0018		0	0.3517	14.4	0.0009	low similarity	1	0	0	0	no fragment overlap	0	0.6727	62.8	0.002		0
47	11	CHLOROFORM	Ethanol	000067-66-3	CHCl3	dry	2.27	2.308	2.524	2.311	2.594	0.81	0.521	0.172	0.005	0.629	0.34	0.48	0.12	0	0.62	0.39	0.45	0	0	0.6167	0.6073	43.5	0.0197		0	0.578	36.6	0.0035		0	0	0	0	no fragment overlap	0	0	0	0	no fragment overlap	0
157	11	TETRACHLOROMETHANE	Ethanol	000056-23-5	CCl4	dry	2.81	2.754	3.353	2.66	3.31	0.926	0.298	0.067	-0.016	0.759	0.42	0.55	0	0	0.74	0.52	0.6	0	0	0.7391	0.4857	24.2	0.0349	low similarity	1	0.6167	41.8	0.0062		0	0	0	0	no fragment overlap	0	0	0	0	no fragment overlap	0
219	11	TERT-BUTYLCHLORIDE	Ethanol	000507-20-0	C4H9Cl	dry	3.02	2.873	2.458	2.832	2.321	0.89	0.45	0.056	0.17	0.745	0.11	0.26	0	0.07	0.79	0.13	0.15	0	0	0.7946	0.5558	33.3	0.0022		0	0.4394	21.7	0.0004	low similarity	1	0	0	0	no fragment overlap	0	0	0	0	no fragment overlap	0
30856	11	ETHYLBROMIDE	Ethanol	000074-96-4	C2H5Br	dry	1.68	2.064	1.797	1.862	1.702	0.817	0.494	0.055	0.103	0.533	0.31	0.4	0	0.03	0.57	0.34	0.39	0	0.09	0.5654	0.8018	81.2	0.019		0	0.9742	99	0.0263		0	0	0	0	no fragment overlap	0	0.8791	91	0.0371		0
75	11	1,4-DIOXANE	Ethanol	000123-91-1	C4H8O2	dry	-0.27	0.856	0.172	0.532	-0.12	0.729	0.837	0.011	0.592	0.668	0.29	0.58	0	0.44	0.68	0.37	0.53	0	0.68	0.681	0.5033	27	0.0243		0	0.5954	38.4	0.0501		0	0	0	0	no fragment overlap	0	0.1703	3.2	0.0199	out of domain	2
4	11	ACETONE	Ethanol	000067-64-1	C3H6O	dry	-0.02	0.574	0.047	0.27	-0.278	0.63	0.712	0.046	0.485	0.515	0.22	0.67	0	0.34	0.55	0.12	0.64	0	0.5	0.547	0.5931	40.1	0.0018		0	0.6565	47.5	0.0268		0	0	0	0	no fragment overlap	0	0.334	13	0.0452	low similarity	1
40	11	2-BUTANONE	Ethanol	000078-93-3	C4H8O	dry	0.44	1.113	0.725	0.893	0.446	0.692	0.668	0.033	0.461	0.649	0.21	0.67	0	0.34	0.69	0.12	0.63	0	0.48	0.6879	0.5931	40.1	0.0018		0	0.891	87.7	0.0084		0	0	0	0	no fragment overlap	0	0.4432	25.5	0.0579		0
400	11	METHYLPROPIONATE	Ethanol	000554-12-1	C4H8O2	dry	0.89	1.289	0.868	1.126	0.691	0.653	0.734	0.033	0.469	0.713	0.07	0.58	0	0.36	0.75	0.09	0.6	0	0.44	0.7466	0.4929	25.2	0.0079		0	0.9361	95.5	0.0047		0	0	0	0	no fragment overlap	0	0.4969	33.4	0.0519		0
240	11	BUTYLAMINE	Ethanol	000109-73-9	C4H11N	dry	0.8	0.769	1.483	0.719	0.803	0.85	0.338	0.278	0.437	0.711	0.2	0.5	0.21	0.58	0.77	0.2	0.32	0.17	0.56	0.772	0.7765	76.4	0.0252		0	0.6992	53.5	0.0019		0	0.8347	87.5	0.0271		0	0.7619	77.9	0.0238		0
1147	11	1-OCTYLAMINE	Ethanol	000111-86-4	C8H19N	dry	2.96	2.918	3.549	3.204	3.003	1.271	0.4	0.282	0.464	1.233	0.19	0.52	0.21	0.59	1.34	0.2	0.32	0.17	0.56	1.3356	0.7765	76.4	0.0252		0	0.6992	53.5	0.0019		0	0.8347	87.5	0.0271		0	0.7619	77.9	0.0238		0
179	11	DIMETHYLAMINE	Ethanol	000124-40-3	C2H7N	dry	-0.75	0.177	0.753	-0.095	0.144	0.668	0.311	0.179	0.343	0.455	0.16	0.34	0.13	0.47	0.49	0.17	0.32	0.21	0.53	0.4902	0.2386	5.8	0.0025	low similarity	1	0.6992	53.5	0.0019		0	0.0009	0.3	0.3082	out of domain structural outlier	2	0.2127	5.5	0.1791	high leverage low similarity	1
61	11	DIETHYLAMINE	Ethanol	000109-89-7	C4H11N	dry	0.51	1.25	2.017	1.145	1.491	0.867	0.277	0.165	0.308	0.716	0.15	0.35	0.13	0.48	0.77	0.17	0.32	0.02	0.59	0.772	0.2386	5.8	0.0025	low similarity	1	0.6992	53.5	0.0019		0	0.3635	48.3	0.4003	structural outlier	2	0.3023	10.8	0.0392	low similarity	1
533	11	TRIMETHYLAMINE	Ethanol	000075-50-3	C3H9N	dry	0.32	0.502	1.595	0.103	1.124	0.798	0.283	0.066	0.264	0.581	0.17	0.36	0	0.53	0.63	0.17	0.32	0	0.62	0.6311	0.2386	5.8	0.0025	low similarity	1	0.6992	53.5	0.0019		0	0	0	0	no fragment overlap	0	0.3054	11	0.2454	high leverage low similarity	1
3	11	ACETONITRILE	Ethanol	000075-05-8	C2H3N	dry	0.05	0.444	-0.353	0.15	-0.513	0.504	0.837	0.106	0.417	0.391	0.19	0.72	0	0.2	0.4	0.17	0.56	0.05	0.18	0.4042	0.8597	91.7	0.0113		0	0.2974	9.7	0.0109	low similarity	1	0.2134	32.2	0.011		0	0.4544	26.8	0.0194		0
110	11	METHANOL	Ethanol	000067-56-1	CH4O	dry	-0.34	0.034	-0.235	-0.02	-0.839	0.473	0.549	0.586	0.378	0.295	0.21	0.44	0.31	0.3	0.31	0.19	0.28	0.31	0.2	0.3082	0.0194	1.9	0.0022	out of domain	2	0.2446	7.5	0.0017	low similarity	1	0	0	0.0086	out of domain	2	0	0	0.0014	out of domain	2
11	11	ETHANOL	Ethanol	000064-17-5	C2H6O	dry	0.06	0.572	0.283	0.603	-0.32	0.564	0.522	0.562	0.391	0.424	0.21	0.45	0.31	0.31	0.45	0.19	0.37	0.33	0.33	0.4491	0.0194	1.9	0.0022	out of domain	2	0.8374	76.4	0.0078		0	0.296	43.7	0.034		0	0.3233	12.3	0.0151	low similarity	1
140	11	1-PROPANOL	Ethanol	000071-23-8	C3H8O	dry	0.64	1.109	0.757	1.225	0.204	0.643	0.538	0.528	0.406	0.556	0.21	0.45	0.31	0.31	0.59	0.19	0.37	0.33	0.39	0.59	0.0194	1.9	0.0022	out of domain	2	0.8374	76.4	0.0078		0	0.296	43.7	0.034		0	0.3558	14.6	0.0213	low similarity	1
95	11	2-PROPANOL	Ethanol	000067-63-0	C3H8O	dry	0.38	1.027	0.706	1.12	0.119	0.654	0.524	0.513	0.422	0.554	0.22	0.43	0.31	0.34	0.59	0.19	0.28	0.31	0.42	0.59	0.0194	1.9	0.0022	out of domain	2	0.2446	7.5	0.0017	low similarity	1	0	0	0.0086	out of domain	2	0	0	0.1444	out of domain	2
31	11	BENZENE	Ethanol	000071-43-2	C6H6	dry	2.15	2.165	2.401	1.969	2.333	1.173	0.598	0.059	0.102	0.674	0.56	0.69	0	0.12	0.72	0.58	0.6	0	0.13	0.7164	0.3858	14.7	0.0092	low similarity	1	0.7874	70.4	0.0024		0	0	0	0	no fragment overlap	0	0.6062	49.6	0.0039		0
161	11	TOLUENE	Ethanol	000108-88-3	C7H8	dry	2.63	2.781	2.884	2.65	2.812	1.315	0.606	0.056	0.121	0.802	0.58	0.63	0	0.12	0.86	0.63	0.62	0	0.16	0.8573	0.5953	40.7	0.0035		0	0.8573	81	0.0021		0	0	0	0	no fragment overlap	0	0.7763	79.5	0.0029		0
25	11	ETHYLBENZENE	Ethanol	000100-41-4	C8H10	dry	3.031	3.318	3.377	3.272	3.322	1.428	0.614	0.054	0.132	0.928	0.58	0.64	0	0.12	1	0.63	0.48	0	0.17	0.9982	0.5953	40.7	0.0035		0	0.942	96.3	0.011		0	0	0	0	no fragment overlap	0	0.8392	87.5	0.0042		0
2821	11	PENTACHLOROBENZENE	Ethanol	000608-93-5	C6HCl5	dry	5.05	4.835	4.984	4.918	4.922	2.134	0.726	0.088	0.137	1.294	1.2	1.13	0	0	1.33	1.28	0.88	0.05	0	1.3284	0.365	13.1	0.0134	low similarity	1	0.6886	52.2	0.121	high leverage	1	0.7295	82.7	0.1255	structural outlier	2	0.9515	98.3	0.0007		0
2822	11	HEXACHLOROBENZENE	Ethanol	000118-74-1	C6Cl6	dry	5.4	5.27	5.4	5.399	5.276	2.337	0.714	0.053	0.171	1.409	1.33	1.23	0	0	1.45	1.42	1.08	0	0	1.4508	0.4172	17	0.0278	low similarity	1	0.4378	21.5	0.0112	low similarity	1	0	0	0	no fragment overlap	0	0	0	0	no fragment overlap	0
492	11	BENZYLCHLORIDE	Ethanol	000100-44-7	C7H7Cl	dry	3.02	3.181	2.786	3.108	2.889	1.47	0.948	0.1	0.222	0.936	0.7	0.78	0	0.12	0.98	0.83	0.8	0	0.17	0.9797	0.7005	62.3	0.0099		0	0.6639	48.6	0.0211		0	0	0	0	no fragment overlap	0	0.8392	87.5	0.0042		0
2662	11	4-CHLOROBIPHENYL(PCB_3)	Ethanol	002051-62-9	C12H9Cl	dry	4.78	4.565	4.545	4.503	4.407	2.614	1.07	0.142	0.297	1.362	1.53	1.24	0	0.21	1.45	1.46	1.15	0	0.23	1.4466	0.7885	79.5	0.0084		0	0.8265	74.7	0.0045		0	0	0	0	no fragment overlap	0	0.792	82.3	0.0073		0
471	11	BIPHENYL	Ethanol	000092-52-4	C12H10	dry	4.08	4.088	3.996	3.989	3.985	2.339	1.096	0.088	0.267	1.232	1.39	1.16	0	0.21	1.32	1.32	1.07	0	0.27	1.3242	0.5679	35.5	0.0134		0	0.8607	81.2	0.006		0	0	0	0	no fragment overlap	0	0.6182	52.1	0.0119		0
927	11	PHENANTHRENE	Ethanol	000085-01-8	C14H10	dry	4.56	4.604	4.416	4.386	4.263	3.016	1.258	0.111	0.321	1.357	1.99	1.34	0	0.23	1.45	2.07	1.25	0	0.22	1.4544	0.6251	46.3	0.1686	high leverage	1	0.6533	47.1	0.007		0	0	0	0	no fragment overlap	0	0.6043	49.3	0.011		0
123	11	NAPHTHALENE	Ethanol	000091-20-3	C10H8	dry	3.43	3.386	3.428	3.18	3.358	2.055	0.936	0.077	0.202	1.018	1.27	1.02	0	0.17	1.09	1.28	0.93	0	0.18	1.0854	0.4324	18.5	0.0099	low similarity	1	0.7946	71.1	0.0038		0	0	0	0	no fragment overlap	0	0.6351	55.2	0.007		0
1169	11	ACENAPHTHYLENE-1,2-DIHYDRO	Ethanol	000083-32-9	C12H10	dry	3.794	4.283	4.025	4.095	3.908	2.33	0.96	0.055	0.247	1.19	1.53	0.99	0	0.15	1.26	1.58	1.07	0	0.27	1.2586	0.6334	47.9	0.1371	high leverage	1	0.6768	50.5	0.0085		0	0	0	0	no fragment overlap	0	0.7471	75.1	0.0146		0
1183	11	FLUORANTHENE	Ethanol	000206-44-0	C16H10	dry	4.883	5.128	4.863	4.792	4.63	3.527	1.389	0.112	0.37	1.495	2.6	1.52	0	0.25	1.58	2.27	1.53	0	0.32	1.5846	0.1058	2.8	0.3054	out of domain structural outlier	2	0.5354	31.6	0.0121		0	0	0	0	no fragment overlap	0	0.4466	25.9	0.0269		0
387	11	1,2,4,5-TETRAMETHYLBENZENE	Ethanol	000095-93-2	C10H14	dry	4.193	4.63	4.305	4.695	4.219	1.757	0.638	0.05	0.173	1.174	0.65	0.46	0	0.12	1.28	0.72	0.65	0	0.35	1.28	0.7406	70.1	0.0066		0	0.6885	52.1	0.0171		0	0	0	0	no fragment overlap	0	0.4189	22.2	0.0813	low similarity	1
1533	11	2,6-DIMETHYLNAPHTHALENE	Ethanol	000581-42-0	C12H12	dry	4.56	4.617	4.457	4.541	4.353	2.458	0.969	0.07	0.236	1.278	1.32	0.9	0	0.17	1.37	1.35	0.95	0	0.23	1.3672	0.7468	71.4	0.0054		0	0.7523	63.3	0.0052		0	0	0	0	no fragment overlap	0	0.8967	92.8	0.0078		0
30861	11	1-BROMOBUTANE	Ethanol	000109-65-9	C4H9Br	dry	2.8	3.14	2.834	3.107	2.792	1.069	0.521	0.052	0.109	0.783	0.31	0.41	0	0.04	0.85	0.34	0.39	0	0.09	0.8472	0.8018	81.2	0.019		0	0.9742	99	0.0263		0	0	0	0	no fragment overlap	0	0.8791	91	0.0371		0
1181	11	9H-FLUORENE	Ethanol	000086-73-7	C13H10	dry	4.098	4.447	4.056	4.282	3.975	2.587	1.163	0.082	0.311	1.279	1.65	1.13	0	0.19	1.36	1.69	1.16	0	0.37	1.3565	0.3057	9.5	0.5967	structural outlier	2	0.6605	48.1	0.0851	high leverage	1	0	0	0	no fragment overlap	0	0.4173	22	0.0204	low similarity	1
5441	11	MONURON	Ethanol	000150-68-5	C9H11ClN2O	dry	2.221	1.975	2.989	2.264	2.78	2.143	1.361	0.419	0.63	1.382	1.16	1.59	0.37	0.84	1.48	1.29	1.5	0.38	0.84	1.4768	0.7036	62.8	0.0547		0	0.638	45.1	0.0507		0	0.0686	5.8	0.0165	low similarity	1	0.7017	67.8	0.0455		0
21	11	ETHYLACETATE	Ethanol	000141-78-6	C4H8O2	dry	0.814	1.289	0.903	1.126	0.729	0.667	0.735	0.033	0.464	0.716	0.07	0.58	0	0.36	0.75	0.07	0.62	0	0.48	0.7466	0.8503	90.3	0.0205		0	0.7051	54.7	0.0219		0	0	0	0	no fragment overlap	0	0.7374	72.8	0.0319		0
5954	11	PHENACETIN	Ethanol	000062-44-2	C10H13NO2	dry	1.775	1.714	2.385	2.085	2.023	2.007	1.37	0.497	0.765	1.366	0.96	1.55	0.41	0.87	1.45	0.93	1.4	0.38	0.8	1.4542	0.8758	94.1	0.1723	high leverage	1	0.7026	54.5	0.1019	high leverage	1	0.0686	5.8	0.0165	low similarity	1	0.7315	71.7	0.0291		0
6465	11	ACETAMINOPHEN	Ethanol	000103-90-2	C8H9NO2	dry	0.64	0.451	1.516	1.239	0.861	1.657	1.339	1.281	0.732	1.106	1.12	1.66	0.91	0.93	1.17	1.07	1.82	0.91	0.75	1.1724	0.7434	70.8	0.1979	high leverage	1	0.7737	68.4	0.1222	high leverage	1	0.0414	2.8	0.0603	out of domain	2	0.7903	82.1	0.0205		0
40086	11	Trimethoprim	Ethanol	000738-70-5	C14H18N4O3	dry	0.943	1.085	1.927	1.364	0.829	2.863	1.918	0.915	1.604	2.053	2.04	2.81	0.45	1.62	2.18	2.14	2.62	0.55	1.74	2.1813	0.6533	52.1	0.0715		0	0.4964	27.6	0.1831	structural outlier	2	0	0	0.048	out of domain	2	0.3959	19.8	0.0772	low similarity	1
31045	11	TRIPHENYLPHOSPHINE	Ethanol	000603-35-0	C18H15P	dry	5.497	6.168	5.826	6.196	5.774	3.718	1.675	0.11	0.581	1.986	1.82	1.15	0	0.57	2.14	2.07	1.6	0	0.64	2.1366	0.3963	15.3	0.1661	high leverage low similarity	1	0.4024	18.3	0.0134	low similarity	1	0	0	0	no fragment overlap	0	0.515	36.1	1	leverage > 1	3
31691	11	THIOUREA	Ethanol	000062-56-6	CH4N2S	dry	-0.66	-0.945	0.851	-1.199	0.309	1.082	1.059	1.492	0.332	0.547	1.07	0.97	0.42	0.82	0.57	0.97	2.35	0.55	0.69	0.5696	0.4086	16.4	0.047	low similarity	1	0.183	3.4	1.3603	leverage > 1	3	0	0	0.048	out of domain	2	0.4542	26.7	0.0324		0
40010	11	Atropine	Ethanol	000051-55-8	C17H23NO3	dry	2.036	3.498	3.489	3.832	2.663	2.319	1.282	0.282	1.351	2.147	1.46	1.63	0.31	1.31	2.28	1.2	1.76	0.27	1.62	2.282	0.5496	32.3	0.6123	structural outlier	2	0.3919	17.4	0.0969	high leverage low similarity	1	0.6981	79.2	0.0972	high leverage	1	0.3543	14.5	0.3758	structural outlier	2
5972	11	DIPHENYL-SULFONE	Ethanol	000127-63-9	C12H10O2S	dry	2.599	2.411	2.818	2.383	2.709	2.327	1.549	0.124	0.769	1.508	1.26	2.01	0	0.74	1.61	1.49	2.02	0	0.77	1.6051	0.4724	23.2	0.0293	low similarity	1	0.4865	26.6	0.0247		0	0	0	0	no fragment overlap	0	0.6377	55.7	0.0197		0
859	11	4-NITROANILINE	Ethanol	000100-01-6	C6H6N2O2	dry	1.6	1.107	1.443	1.184	1.098	1.614	1.318	0.843	0.559	0.947	1.13	1.65	0.28	0.53	0.99	1.2	1.62	0.27	0.45	0.9904	0.734	68.5	0.0114		0	0.4809	26.1	0.0786		0	0	0	0.012	out of domain	2	0.6066	49.7	0.0106		0
5938	11	METHYL-P-AMINOBENZOATE	Ethanol	000619-45-4	C8H9NO2	dry	1.44	1.098	1.855	1.103	1.528	1.714	1.299	0.648	0.627	1.109	0.95	1.42	0.23	0.76	1.17	1.05	1.38	0.27	0.62	1.1724	0.8997	96	0.0165		0	0.7675	67.2	0.0112		0	0	0	0.012	out of domain	2	0.601	48.8	0.0146		0
5946	11	ETHYL-P-AMINOBENZOATE	Ethanol	000094-09-7	C9H11NO2	dry	2.06	1.636	2.402	1.725	2.098	1.824	1.294	0.632	0.632	1.241	0.94	1.43	0.23	0.76	1.31	1.01	1.39	0.27	0.7	1.3133	0.9542	99.3	0.0116		0	0.7842	70.1	0.0214		0	0	0	0.012	out of domain	2	0.665	60.4	0.0251		0
6043	11	METHYL-4-DIMETHYLAMINOBENZOATE	Ethanol	001202-25-1	C10H13NO2	dry	2.61	2.189	2.593	2.04	2.358	2.148	1.315	0.075	0.708	1.358	0.88	1.26	0	0.79	1.45	1.03	1.22	0	0.82	1.4542	0.7259	66.7	0.1377	high leverage	1	0.8309	75.4	0.0067		0	0	0	0	no fragment overlap	0	0.5703	45	0.0343		0
1755	11	1,3,5-TRINITROBENZENE	Ethanol	000099-35-4	C6H3N3O6	dry	1.19	1.85	1.525	1.819	1.911	1.503	1.819	0.308	0.669	1.229	1.37	2.4	0	0.41	1.24	1.4	2.02	0	0.42	1.239	0.7278	67.5	0.0348		0	0.242	6.4	0.0316	low similarity	1	0	0	0	no fragment overlap	0	0.218	5.9	0.0461	low similarity	1
833	11	ACETYLAMINOBENZENE	Ethanol	000103-84-4	C8H9NO	dry	1.31	1.229	1.886	1.512	1.58	1.62	1.167	0.502	0.564	1.043	0.89	1.42	0.41	0.67	1.11	1	1.35	0.49	0.68	1.1137	0.5432	31.7	0.0344		0	0.7694	67.8	0.1037	high leverage	1	0.2639	39.5	0.1739	structural outlier	2	0.5356	39.1	0.0436		0
6044	11	METHACETIN	Ethanol	000051-66-1	C9H11NO2	dry	1.2	1.175	1.816	1.463	1.438	1.851	1.366	0.509	0.765	1.236	0.96	1.55	0.41	0.87	1.31	0.99	1.75	0.38	0.77	1.3133	0.8575	91.3	0.2005	high leverage	1	0.7952	71.3	0.1283	high leverage	1	0.0686	5.8	0.0165	low similarity	1	0.6924	66	0.022		0
608	11	3-NITROPHENOL	Ethanol	000554-84-7	C6H5NO3	dry	2.17	1.311	2.031	1.918	1.917	1.309	1.252	1.042	0.362	0.92	1.05	1.47	0.69	0.49	0.95	1.01	1.48	0.68	0.39	0.9493	0.791	79.8	0.0125		0	0.5722	35.8	0.0515		0	0.2965	43.9	0.1134	structural outlier	2	0.6693	61.1	0.0063		0
5931	11	METHYL-P-HYDROXYBENZOATE	Ethanol	000099-76-3	C8H8O3	dry	2.2	1.312	2.172	1.888	1.921	1.483	1.268	0.978	0.511	1.083	0.87	1.24	0.66	0.72	1.13	0.91	1.33	0.7	0.56	1.1313	0.8287	85.8	0.034		0	0.5546	33.6	0.0292		0	0.6017	71.9	0.1114	structural outlier	2	0.772	78.7	0.0107		0
147	11	METHYLSALICYLATE	Ethanol	000119-36-8	C8H8O3	dry	2.51	2.533	2.395	2.579	2.358	1.521	1.058	0.1	0.444	1.064	0.8	1.06	0.13	0.4	1.13	0.82	0.83	0.09	0.41	1.1313	0.6438	50.2	0.0174		0	0.6618	48.3	0.1471	high leverage	1	0.2584	38.4	0.1715	structural outlier	2	0.4447	25.7	0.1387	high leverage	1
5941	11	BARBITAL	Ethanol	000057-44-3	C8H12N2O3	dry	1.1	0.405	1.148	0.647	0.475	1.188	1.271	1.078	0.983	1.287	0.98	1.35	0.52	1.21	1.37	1.03	1.11	0.54	1.19	1.3739	0.9959	99.7	0.0427		0	0.867	82.6	0.02		0	0.2584	38.4	0.0672	high leverage	1	0.7492	75.7	0.0444		0
5957	11	BUTABARBITAL	Ethanol	000125-40-6	C10H16N2O3	dry	1.69	1.398	2.117	1.787	1.471	1.397	1.262	1.043	1.003	1.53	0.99	1.34	0.52	1.24	1.66	1.03	1.11	0.46	1.19	1.6557	0.9959	99.7	0.0427		0	0.867	82.6	0.02		0	0.3063	44.5	0.3109	structural outlier	2	0.7492	75.7	0.0444		0
5968	11	PENTOBARBITAL	Ethanol	000076-74-4	C11H18N2O3	dry	2.68	1.937	2.627	2.409	2.02	1.487	1.273	1.036	1.01	1.66	0.98	1.35	0.52	1.24	1.8	0.98	0.96	0.46	1.19	1.7966	0.8317	86.4	0.2062	high leverage	1	0.659	47.8	0.5379	structural outlier	2	0.3063	44.5	0.3109	structural outlier	2	0.7492	75.7	0.0444		0
5967	11	AMOBARBITAL	Ethanol	000057-43-2	C11H18N2O3	dry	2.31	1.937	2.564	2.409	1.975	1.503	1.326	1.062	1.022	1.665	0.98	1.35	0.52	1.24	1.8	1.03	1.11	0.54	1.19	1.7966	0.9959	99.7	0.0427		0	0.867	82.6	0.02		0	0.2584	38.4	0.0672	high leverage	1	0.7492	75.7	0.0444		0
6041	11	VINBARBITAL	Ethanol	000125-42-8	C11H16N2O3	dry	1.95	1.577	2.775	1.961	2.203	1.57	1.29	1.07	0.948	1.634	1.11	1.4	0.52	1.3	1.75	1.2	1.23	0.54	1.33	1.7536	0.7731	75.6	0.0493		0	0.9158	92.1	0.0202		0	0.2584	38.4	0.0672	high leverage	1	0.699	67.6	0.1899	high leverage	1
5973	11	PHENOBARBITAL	Ethanol	000050-06-6	C12H12N2O3	dry	1.77	1.182	2.202	1.447	1.617	1.903	1.599	1.157	1.03	1.601	1.56	1.81	0.52	1.29	1.7	1.64	1.68	0.54	1.19	1.6999	0.6205	45.6	0.0526		0	0.6999	54.3	0.0399		0	0.2584	38.4	0.0672	high leverage	1	0.6026	49.1	0.1912	high leverage	1
5966	11	THIOPENTAL	Ethanol	000076-75-5	C11H18N2O2S	dry	2.88	1.582	4.016	1.986	3.488	2.161	1.285	0.965	0.811	1.765	1.49	2	0.51	1.34	1.9	1.23	1.31	0.58	1.03	1.9014	0.2212	5	0.1933	high leverage low similarity	1	0.2883	9.4	0.5133	structural outlier	2	0.5423	67.6	0.5373	structural outlier	2	0.4929	32.8	0.0475		0
5977	11	THIAMYLAL	Ethanol	000077-27-0	C12H18N2O2S	dry	3.38	1.761	4.198	2.16	3.715	2.328	1.424	1.013	0.847	1.859	1.61	2.06	0.51	1.39	2	1.35	1.32	0.58	1.1	1.9993	0.2054	4.4	0.2014	out of domain	2	0.2837	9.1	0.1974	structural outlier	2	0.5423	67.6	0.5373	structural outlier	2	0.4672	28.6	0.0537		0
5950	11	METHARBITAL	Ethanol	000050-11-3	C9H14N2O3	dry	1.24	0.702	1.423	0.623	0.998	1.257	1.305	0.521	1.019	1.418	1	1.36	0.24	1.26	1.51	0.94	1.11	0.18	1.23	1.5148	0.2884	8.2	0.0183	low similarity	1	0.4838	26.5	0.3296	structural outlier	2	0.6426	75.1	0.3318	structural outlier	2	0.7954	82.7	0.29	structural outlier	2
1051	140	METHANE	1-Propanol	000074-82-8	CH4	dry	1.17	0.914	1.306	0.842	1.051	0.516	0.15	0.035	-0.042	0.228	0.11	0.21	0	0.01	0.25	0	0	0	0	0.2495	0	0	0	no fragment overlap	0	0	0	0	no fragment overlap	0	0	0	0	no fragment overlap	0	0	0	0	no fragment overlap	0
134	140	PENTANE	1-Propanol	000109-66-0	C5H12	dry	3.51	3.073	3.681	3.188	3.568	0.876	0.106	0.049	-0.06	0.747	0	0.19	0	0.04	0.81	0	0	0	0	0.8131	0	0	0	no fragment overlap	0	0	0	0	no fragment overlap	0	0	0	0	no fragment overlap	0	0	0	0	no fragment overlap	0
89	140	HEXANE	1-Propanol	000110-54-3	C6H14	dry	4.1	3.625	4.236	3.785	4.137	0.98	0.097	0.055	-0.055	0.875	0	0.19	0	0.04	0.95	0	0	0	0	0.954	0	0	0	no fragment overlap	0	0	0	0	no fragment overlap	0	0	0	0	no fragment overlap	0	0	0	0	no fragment overlap	0
91	140	HEPTANE	1-Propanol	000142-82-5	C7H16	dry	4.7	4.176	4.744	4.381	4.689	1.105	0.122	0.055	-0.049	1	0	0.2	0	0.05	1.09	0	0	0	0	1.0949	0	0	0	no fragment overlap	0	0	0	0	no fragment overlap	0	0	0	0	no fragment overlap	0	0	0	0	no fragment overlap	0
74	140	2,4-DIMETHYLPENTANE	1-Propanol	000108-08-7	C7H16	dry	4.51	4.002	4.457	4.13	4.326	1.061	0.115	0.06	0.017	0.995	0.02	0.16	0	0.1	1.09	0	0	0	0	1.0949	0	0	0	no fragment overlap	0	0	0	0	no fragment overlap	0	0	0	0	no fragment overlap	0	0	0	0	no fragment overlap	0
128	140	OCTANE	1-Propanol	000111-65-9	C8H18	dry	5.28	4.728	5.354	4.978	5.362	1.191	0.126	0.058	-0.057	1.135	0	0.2	0	0.05	1.24	0	0	0	0	1.2358	0	0	0	no fragment overlap	0	0	0	0	no fragment overlap	0	0	0	0	no fragment overlap	0	0	0	0	no fragment overlap	0
398	140	NONANE	1-Propanol	000111-84-2	C9H20	dry	5.85	5.277	5.854	5.57	5.897	1.328	0.153	0.058	-0.05	1.258	-0.01	0.2	0	0.05	1.38	0	0	0	0	1.3767	0	0	0	no fragment overlap	0	0	0	0	no fragment overlap	0	0	0	0	no fragment overlap	0	0	0	0	no fragment overlap	0
1693	140	CYCLOPROPANE	1-Propanol	000075-19-4	C3H6	dry	1.7	1.623	1.805	1.597	1.715	0.657	0.3	0.037	0.018	0.435	0.22	0.27	0	0.01	0.42	0.17	0	0	0	0.4227	0.6481	51.2	0.0383		0	0	0	0	no fragment overlap	0	0	0	0	no fragment overlap	0	0	0	0	no fragment overlap	0
401	140	ETHYLCYCLOHEXANE	1-Propanol	001678-91-7	C8H16	dry	4.87	4.291	4.675	4.45	4.615	1.189	0.18	0.044	-0.003	1.035	0.22	0.27	0	0.05	1.13	0.26	0.18	0	0	1.1272	0.6786	58.3	0.003		0	0.5193	29.6	0.0021		0	0	0	0	no fragment overlap	0	0	0	0	no fragment overlap	0
1053	140	ETHYLENE	1-Propanol	000074-85-1	C2H4	dry	1.32	1.118	1.321	1.023	1.191	0.621	0.325	0.044	0.022	0.329	0.1	0.19	0	0.07	0.35	0.12	0.11	0	0.07	0.3474	0.5931	40.1	0.0018		0	0.3517	14.4	0.0009	low similarity	1	0	0	0	no fragment overlap	0	0.6727	62.8	0.002		0
1055	140	PROPYLENE	1-Propanol	000115-07-1	C3H6	dry	1.96	1.589	1.851	1.541	1.749	0.74	0.33	0.039	0.029	0.456	0.13	0.24	0	0.08	0.49	0.12	0.11	0	0.07	0.4883	0.5931	40.1	0.0018		0	0.3517	14.4	0.0009	low similarity	1	0	0	0	no fragment overlap	0	0.6727	62.8	0.002		0
316	140	2-METHYLPROPANE	1-Propanol	000075-28-5	C4H10	dry	3	2.433	3.024	2.466	2.88	0.773	0.127	0.044	-0.043	0.618	0.01	0.17	0	0.06	0.67	0	0	0	0	0.6722	0	0	0	no fragment overlap	0	0	0	0	no fragment overlap	0	0	0	0	no fragment overlap	0	0	0	0	no fragment overlap	0
368	140	1-BUTENE	1-Propanol	000106-98-9	C4H8	dry	2.48	2.14	2.425	2.138	2.34	0.849	0.318	0.041	0.031	0.585	0.13	0.24	0	0.09	0.63	0.12	0.11	0	0.07	0.6292	0.5931	40.1	0.0018		0	0.3517	14.4	0.0009	low similarity	1	0	0	0	no fragment overlap	0	0.6727	62.8	0.002		0
457	140	ISOBUTYLENE	1-Propanol	000115-11-7	C4H8	dry	2.33	2.131	2.293	2.086	2.191	0.859	0.34	0.043	0.055	0.58	0.11	0.18	0	0.1	0.63	0.18	0.11	0	0.07	0.6292	0.4198	17.1	0.0718	low similarity	1	0.3517	14.4	0.0009	low similarity	1	0	0	0	no fragment overlap	0	0.6727	62.8	0.002		0
450	140	TRANS-2-BUTENE	1-Propanol	000624-64-6	C4H8	dry	2.55	2.062	2.506	2.064	2.41	0.863	0.3	0.041	0.018	0.586	0.16	0.28	0	0.1	0.63	0.16	0.11	0	0.07	0.6292	0.6665	54.7	0.0092		0	0.3517	14.4	0.0009	low similarity	1	0	0	0	no fragment overlap	0	0.6727	62.8	0.002		0
460	140	CIS-2-BUTENE	1-Propanol	000590-18-1	C4H8	dry	2.62	2.062	2.402	2.064	2.31	0.858	0.321	0.042	0.032	0.58	0.16	0.28	0	0.1	0.63	0.16	0.11	0	0.07	0.6292	0.6665	54.7	0.0092		0	0.3517	14.4	0.0009	low similarity	1	0	0	0	no fragment overlap	0	0.6727	62.8	0.002		0
364	140	1,3-BUTADIENE	1-Propanol	000106-99-0	C4H6	dry	2.03	1.759	2.012	1.684	1.919	1.041	0.495	0.064	0.079	0.554	0.25	0.3	0	0.14	0.59	0.23	0.23	0	0.14	0.5862	0.4203	17.4	0.0071	low similarity	1	0.746	61.9	0.0037		0	0	0	0	no fragment overlap	0	0.7461	74.9	0.0081		0
1014	140	TETRAFLUOROMETHANE[R14]	1-Propanol	000075-73-0	CF4	dry	1.53	1.267	2.467	1.333	2.508	-0.006	-0.061	0.046	-0.133	0.426	-0.47	-0.03	0	0	0.32	-0.49	-0.42	0	0	0.3203	0.6313	47.7	0.2027	high leverage	1	0.0106	0.1	0.2389	out of domain structural outlier	2	0	0	0	no fragment overlap	0	0	0	0	no fragment overlap	0
157	140	TETRACHLOROMETHANE	1-Propanol	000056-23-5	CCl4	dry	2.81	2.709	3.376	2.89	3.39	0.926	0.298	0.067	-0.016	0.759	0.42	0.55	0	0	0.74	0.52	0.6	0	0	0.7391	0.4857	24.2	0.0349	low similarity	1	0.6167	41.8	0.0062		0	0	0	0	no fragment overlap	0	0	0	0	no fragment overlap	0
219	140	TERT-BUTYLCHLORIDE	1-Propanol	000507-20-0	C4H9Cl	dry	2.86	2.848	2.409	2.932	2.377	0.89	0.45	0.056	0.17	0.745	0.11	0.26	0	0.07	0.79	0.13	0.15	0	0	0.7946	0.5558	33.3	0.0022		0	0.4394	21.7	0.0004	low similarity	1	0	0	0	no fragment overlap	0	0	0	0	no fragment overlap	0
410	140	2-BROMO-2-METHYLPROPANE	1-Propanol	000507-19-7	C4H9Br	dry	2.93	3.048	2.5	3.119	2.521	1.045	0.548	0.048	0.175	0.783	0.29	0.34	0	0.07	0.85	0.3	0.25	0	0	0.8472	0.5525	32.9	0.018		0	0.6782	51	0.0086		0	0	0	0	no fragment overlap	0	0	0	0	no fragment overlap	0
911	140	1,1-DIFLUOROETHANE	1-Propanol	000075-37-6	C2H4F2	dry	1.01	1.717	1.154	1.772	1.288	0.307	0.487	0.106	0.125	0.459	-0.22	0.08	0.09	0	0.43	-0.2	0	0	0	0.4258	0.5724	36.2	0.0116		0	0	0	0	no fragment overlap	0	0	0	0	no fragment overlap	0	0	0	0	no fragment overlap	0
2221	140	1,2-DIFLUOROETHANE	1-Propanol	000624-72-6	C2H4F2	dry	3.31	1.495	0.861	1.528	1.037	0.282	0.565	0.098	0.18	0.464	-0.07	0.19	0	0.03	0.43	-0.2	0.45	0.07	0.25	0.4258	0.5724	36.2	0.0116		0	0.0806	0.5	0.1478	out of domain	2	0.0044	0.7	0.1674	out of domain structural outlier	2	0	0	0.8335	out of domain structural outlier	2
75	140	1,4-DIOXANE	1-Propanol	000123-91-1	C4H8O2	dry	-0.44	0.688	-0.058	0.575	-0.12	0.729	0.837	0.011	0.592	0.668	0.29	0.58	0	0.44	0.68	0.37	0.53	0	0.68	0.681	0.5033	27	0.0243		0	0.5954	38.4	0.0501		0	0	0	0	no fragment overlap	0	0.1703	3.2	0.0199	out of domain	2
40	140	2-BUTANONE	1-Propanol	000078-93-3	C4H8O	dry	0.35	0.955	0.554	1.026	0.455	0.692	0.668	0.033	0.461	0.649	0.21	0.67	0	0.34	0.69	0.12	0.63	0	0.48	0.6879	0.5931	40.1	0.0018		0	0.891	87.7	0.0084		0	0	0	0	no fragment overlap	0	0.4432	25.5	0.0579		0
451	140	DIMETHYLCARBONATE	1-Propanol	000616-38-6	C3H6O3	dry	0	0.154	0.352	0.139	0.537	0.541	0.85	0.057	0.449	0.651	0.05	0.64	0	0.51	0.66	0.06	0.58	0	0.42	0.6644	0.6879	60.2	0.033		0	0.6231	42.6	0.0128		0	0	0	0	no fragment overlap	0	0.5625	43.7	0.0316		0
400	140	METHYLPROPIONATE	1-Propanol	000554-12-1	C4H8O2	dry	0.7	1.14	0.691	1.213	0.724	0.653	0.734	0.033	0.469	0.713	0.07	0.58	0	0.36	0.75	0.09	0.6	0	0.44	0.7466	0.4929	25.2	0.0079		0	0.9361	95.5	0.0047		0	0	0	0	no fragment overlap	0	0.4969	33.4	0.0519		0
720	140	METHYLBUTANOATE	1-Propanol	000623-42-7	C5H10O2	dry	1.2	1.693	1.377	1.81	1.46	0.77	0.723	0.034	0.441	0.84	0.07	0.58	0	0.37	0.89	0.09	0.6	0	0.46	0.8875	0.4929	25.2	0.0079		0	0.9361	95.5	0.0047		0	0	0	0	no fragment overlap	0	0.9413	96.8	0.0122		0
179	140	DIMETHYLAMINE	1-Propanol	000124-40-3	C2H7N	dry	-0.96	0.037	0.668	-0.265	0.068	0.668	0.311	0.179	0.343	0.455	0.16	0.34	0.13	0.47	0.49	0.17	0.32	0.21	0.53	0.4902	0.2386	5.8	0.0025	low similarity	1	0.6992	53.5	0.0019		0	0.0009	0.3	0.3082	out of domain structural outlier	2	0.2127	5.5	0.1791	high leverage low similarity	1
533	140	TRIMETHYLAMINE	1-Propanol	000075-50-3	C3H9N	dry	0.21	0.335	1.528	0.036	1.112	0.798	0.283	0.066	0.264	0.581	0.17	0.36	0	0.53	0.63	0.17	0.32	0	0.62	0.6311	0.2386	5.8	0.0025	low similarity	1	0.6992	53.5	0.0019		0	0	0	0	no fragment overlap	0	0.3054	11	0.2454	high leverage low similarity	1
110	140	METHANOL	1-Propanol	000067-56-1	CH4O	dry	-0.59	-0.06	-0.302	-0.247	-1.029	0.473	0.549	0.586	0.378	0.295	0.21	0.44	0.31	0.3	0.31	0.19	0.28	0.31	0.2	0.3082	0.0194	1.9	0.0022	out of domain	2	0.2446	7.5	0.0017	low similarity	1	0	0	0.0086	out of domain	2	0	0	0.0014	out of domain	2
11	140	ETHANOL	1-Propanol	000064-17-5	C2H6O	dry	-0.16	0.492	0.228	0.35	-0.482	0.564	0.522	0.562	0.391	0.424	0.21	0.45	0.31	0.31	0.45	0.19	0.37	0.33	0.33	0.4491	0.0194	1.9	0.0022	out of domain	2	0.8374	76.4	0.0078		0	0.296	43.7	0.034		0	0.3233	12.3	0.0151	low similarity	1
140	140	1-PROPANOL	1-Propanol	000071-23-8	C3H8O	dry	0.42	1.043	0.706	0.946	0.076	0.643	0.538	0.528	0.406	0.556	0.21	0.45	0.31	0.31	0.59	0.19	0.37	0.33	0.39	0.59	0.0194	1.9	0.0022	out of domain	2	0.8374	76.4	0.0078		0	0.296	43.7	0.034		0	0.3558	14.6	0.0213	low similarity	1
95	140	2-PROPANOL	1-Propanol	000067-63-0	C3H8O	dry	0.19	0.956	0.65	0.82	-0.01	0.654	0.524	0.513	0.422	0.554	0.22	0.43	0.31	0.34	0.59	0.19	0.28	0.31	0.42	0.59	0.0194	1.9	0.0022	out of domain	2	0.2446	7.5	0.0017	low similarity	1	0	0	0.0086	out of domain	2	0	0	0.1444	out of domain	2
39	140	1-BUTANOL	1-Propanol	000071-36-3	C4H10O	dry	1.01	1.595	1.281	1.543	0.631	0.75	0.524	0.567	0.409	0.682	0.2	0.46	0.31	0.31	0.73	0.19	0.37	0.36	0.47	0.7309	0.0194	1.9	0.0022	out of domain	2	0.8374	76.4	0.0078		0	0.4208	54.5	0.0196		0	0.9246	94.4	0.0188		0
136	140	1-PENTANOL	1-Propanol	000071-41-0	C5H12O	dry	1.62	2.147	1.882	2.14	1.307	0.841	0.536	0.566	0.398	0.814	0.2	0.46	0.31	0.32	0.87	0.19	0.47	0.36	0.47	0.8718	0.0194	1.9	0.0022	out of domain	2	0.8971	89.3	0.0182		0	0.4208	54.5	0.0196		0	0.9246	94.4	0.0188		0
345	140	1-DECANOL	1-Propanol	000112-30-1	C10H22O	dry	4.47	4.898	4.57	5.113	4.255	1.39	0.614	0.537	0.415	1.461	0.19	0.48	0.31	0.33	1.58	0.19	0.47	0.36	0.47	1.5763	0.0194	1.9	0.0022	out of domain	2	0.8971	89.3	0.0182		0	0.4208	54.5	0.0196		0	0.9246	94.4	0.0188		0
31	140	BENZENE	1-Propanol	000071-43-2	C6H6	dry	2.15	2.073	2.349	2.188	2.362	1.173	0.598	0.059	0.102	0.674	0.56	0.69	0	0.12	0.72	0.58	0.6	0	0.13	0.7164	0.3858	14.7	0.0092	low similarity	1	0.7874	70.4	0.0024		0	0	0	0	no fragment overlap	0	0.6062	49.6	0.0039		0
161	140	TOLUENE	1-Propanol	000108-88-3	C7H8	dry	2.66	2.712	2.844	2.818	2.86	1.315	0.606	0.056	0.121	0.802	0.58	0.63	0	0.12	0.86	0.63	0.62	0	0.16	0.8573	0.5953	40.7	0.0035		0	0.8573	81	0.0021		0	0	0	0	no fragment overlap	0	0.7763	79.5	0.0029		0
25	140	ETHYLBENZENE	1-Propanol	000100-41-4	C8H10	dry	3.034	3.263	3.349	3.414	3.392	1.428	0.614	0.054	0.132	0.928	0.58	0.64	0	0.12	1	0.63	0.48	0	0.17	0.9982	0.5953	40.7	0.0035		0	0.942	96.3	0.011		0	0	0	0	no fragment overlap	0	0.8392	87.5	0.0042		0
471	140	BIPHENYL	1-Propanol	000092-52-4	C12H10	dry	4.1	3.994	3.932	4.154	4.043	2.339	1.096	0.088	0.267	1.232	1.39	1.16	0	0.21	1.32	1.32	1.07	0	0.27	1.3242	0.5679	35.5	0.0134		0	0.8607	81.2	0.006		0	0	0	0	no fragment overlap	0	0.6182	52.1	0.0119		0
123	140	NAPHTHALENE	1-Propanol	000091-20-3	C10H8	dry	3.46	3.294	3.368	3.363	3.391	2.055	0.936	0.077	0.202	1.018	1.27	1.02	0	0.17	1.09	1.28	0.93	0	0.18	1.0854	0.4324	18.5	0.0099	low similarity	1	0.7946	71.1	0.0038		0	0	0	0	no fragment overlap	0	0.6351	55.2	0.007		0
1169	140	ACENAPHTHYLENE-1,2-DIHYDRO	1-Propanol	000083-32-9	C12H10	dry	3.89	4.226	3.972	4.224	3.959	2.33	0.96	0.055	0.247	1.19	1.53	0.99	0	0.15	1.26	1.58	1.07	0	0.27	1.2586	0.6334	47.9	0.1371	high leverage	1	0.6768	50.5	0.0085		0	0	0	0	no fragment overlap	0	0.7471	75.1	0.0146		0
1183	140	FLUORANTHENE	1-Propanol	000206-44-0	C16H10	dry	4.867	5.036	4.798	4.92	4.634	3.527	1.389	0.112	0.37	1.495	2.6	1.52	0	0.25	1.58	2.27	1.53	0	0.32	1.5846	0.1058	2.8	0.3054	out of domain structural outlier	2	0.5354	31.6	0.0121		0	0	0	0	no fragment overlap	0	0.4466	25.9	0.0269		0
927	140	PHENANTHRENE	1-Propanol	000085-01-8	C14H10	dry	4.5	4.511	4.352	4.533	4.282	3.016	1.258	0.111	0.321	1.357	1.99	1.34	0	0.23	1.45	2.07	1.25	0	0.22	1.4544	0.6251	46.3	0.1686	high leverage	1	0.6533	47.1	0.007		0	0	0	0	no fragment overlap	0	0.6043	49.3	0.011		0
492	140	BENZYLCHLORIDE	1-Propanol	000100-44-7	C7H7Cl	dry	3.03	3.11	2.7	3.296	2.95	1.47	0.948	0.1	0.222	0.936	0.7	0.78	0	0.12	0.98	0.83	0.8	0	0.17	0.9797	0.7005	62.3	0.0099		0	0.6639	48.6	0.0211		0	0	0	0	no fragment overlap	0	0.8392	87.5	0.0042		0
5938	140	METHYL-P-AMINOBENZOATE	1-Propanol	000619-45-4	C8H9NO2	dry	1.58	0.849	1.756	0.896	1.421	1.714	1.299	0.648	0.627	1.109	0.95	1.42	0.23	0.76	1.17	1.05	1.38	0.27	0.62	1.1724	0.8997	96	0.0165		0	0.7675	67.2	0.0112		0	0	0	0.012	out of domain	2	0.601	48.8	0.0146		0
30991	140	THIOPHENE	1-Propanol	000110-02-1	C4H4S	dry	1.68	2.059	2.007	2.172	2.076	1.111	0.685	0.093	0.112	0.626	0.5	0.62	0	0.06	0.64	0.63	0.83	0	0.19	0.6411	0.5783	37	0.0141		0	0.6595	47.9	0.0228		0	0	0	0	no fragment overlap	0	0.6304	54.2	0.0101		0
387	140	1,2,4,5-TETRAMETHYLBENZENE	1-Propanol	000095-93-2	C10H14	dry	4.27	4.633	4.298	4.712	4.318	1.757	0.638	0.05	0.173	1.174	0.65	0.46	0	0.12	1.28	0.72	0.65	0	0.35	1.28	0.7406	70.1	0.0066		0	0.6885	52.1	0.0171		0	0	0	0	no fragment overlap	0	0.4189	22.2	0.0813	low similarity	1
1181	140	9H-FLUORENE	1-Propanol	000086-73-7	C13H10	dry	4.211	4.375	3.982	4.419	4.018	2.587	1.163	0.082	0.311	1.279	1.65	1.13	0	0.19	1.36	1.69	1.16	0	0.37	1.3565	0.3057	9.5	0.5967	structural outlier	2	0.6605	48.1	0.0851	high leverage	1	0	0	0	no fragment overlap	0	0.4173	22	0.0204	low similarity	1
5441	140	MONURON	1-Propanol	000150-68-5	C9H11ClN2O	dry	2.158	1.752	2.876	1.842	2.763	2.143	1.361	0.419	0.63	1.382	1.16	1.59	0.37	0.84	1.48	1.29	1.5	0.38	0.84	1.4768	0.7036	62.8	0.0547		0	0.638	45.1	0.0507		0	0.0686	5.8	0.0165	low similarity	1	0.7017	67.8	0.0455		0
5954	140	PHENACETIN	1-Propanol	000062-44-2	C10H13NO2	dry	1.653	1.487	2.247	1.609	1.97	2.007	1.37	0.497	0.765	1.366	0.96	1.55	0.41	0.87	1.45	0.93	1.4	0.38	0.8	1.4542	0.8758	94.1	0.1723	high leverage	1	0.7026	54.5	0.1019	high leverage	1	0.0686	5.8	0.0165	low similarity	1	0.7315	71.7	0.0291		0
6465	140	ACETAMINOPHEN	1-Propanol	000103-90-2	C8H9NO2	dry	0.892	0.27	1.513	0.238	0.588	1.657	1.339	1.281	0.732	1.106	1.12	1.66	0.91	0.93	1.17	1.07	1.82	0.91	0.75	1.1724	0.7434	70.8	0.1979	high leverage	1	0.7737	68.4	0.1222	high leverage	1	0.0414	2.8	0.0603	out of domain	2	0.7903	82.1	0.0205		0
40086	140	Trimethoprim	1-Propanol	000738-70-5	C14H18N4O3	dry	0.922	0.614	1.688	0.711	0.646	2.863	1.918	0.915	1.604	2.053	2.04	2.81	0.45	1.62	2.18	2.14	2.62	0.55	1.74	2.1813	0.6533	52.1	0.0715		0	0.4964	27.6	0.1831	structural outlier	2	0	0	0.048	out of domain	2	0.3959	19.8	0.0772	low similarity	1
31691	140	THIOUREA	1-Propanol	000062-56-6	CH4N2S	dry	-0.977	-1.167	0.953	-1.729	-0.048	1.082	1.059	1.492	0.332	0.547	1.07	0.97	0.42	0.82	0.57	0.97	2.35	0.55	0.69	0.5696	0.4086	16.4	0.047	low similarity	1	0.183	3.4	1.3603	leverage > 1	3	0	0	0.048	out of domain	2	0.4542	26.7	0.0324		0
31605	140	ACETOVANILLONE	1-Propanol	000498-02-2	C9H10O3	dry	1.36	1.315	1.649	1.331	1.527	1.662	1.349	0.448	0.711	1.202	1	1.4	0.44	0.78	1.27	0.97	1.4	0.16	0.8	1.2722	0.7039	62.9	0.0077		0	0.6004	39	0.0576		0	0	0	0.6033	out of domain structural outlier	2	0.5342	38.9	0.0173		0
5972	140	DIPHENYL-SULFONE	1-Propanol	000127-63-9	C12H10O2S	dry	2.487	2.096	2.603	2.565	2.763	2.327	1.549	0.124	0.769	1.508	1.26	2.01	0	0.74	1.61	1.49	2.02	0	0.77	1.6051	0.4724	23.2	0.0293	low similarity	1	0.4865	26.6	0.0247		0	0	0	0	no fragment overlap	0	0.6377	55.7	0.0197		0
1051	39	METHANE	1-Butanol	000074-82-8	CH4	dry	1.15	0.923	1.309	0.656	1.205	0.516	0.15	0.035	-0.042	0.228	0.11	0.21	0	0.01	0.25	0	0	0	0	0.2495	0	0	0	no fragment overlap	0	0	0	0	no fragment overlap	0	0	0	0	no fragment overlap	0	0	0	0	no fragment overlap	0
316	39	2-METHYLPROPANE	1-Butanol	000075-28-5	C4H10	dry	3.1	2.48	3.061	2.424	2.913	0.773	0.127	0.044	-0.043	0.618	0.01	0.17	0	0.06	0.67	0	0	0	0	0.6722	0	0	0	no fragment overlap	0	0	0	0	no fragment overlap	0	0	0	0	no fragment overlap	0	0	0	0	no fragment overlap	0
134	39	PENTANE	1-Butanol	000109-66-0	C5H12	dry	3.68	3.131	3.73	3.188	3.571	0.876	0.106	0.049	-0.06	0.747	0	0.19	0	0.04	0.81	0	0	0	0	0.8131	0	0	0	no fragment overlap	0	0	0	0	no fragment overlap	0	0	0	0	no fragment overlap	0	0	0	0	no fragment overlap	0
89	39	HEXANE	1-Butanol	000110-54-3	C6H14	dry	4.26	3.695	4.295	3.832	4.117	0.98	0.097	0.055	-0.055	0.875	0	0.19	0	0.04	0.95	0	0	0	0	0.954	0	0	0	no fragment overlap	0	0	0	0	no fragment overlap	0	0	0	0	no fragment overlap	0	0	0	0	no fragment overlap	0
112	39	3-METHYLPENTANE	1-Butanol	000096-14-0	C6H14	dry	4.18	3.608	4.086	3.712	3.886	0.955	0.111	0.057	-0.014	0.87	0.01	0.18	0	0.07	0.95	0	0	0	0	0.954	0	0	0	no fragment overlap	0	0	0	0	no fragment overlap	0	0	0	0	no fragment overlap	0	0	0	0	no fragment overlap	0
370	39	2,2-DIMETHYLBUTANE	1-Butanol	000075-83-2	C6H14	dry	3.96	3.628	3.873	3.715	3.65	0.961	0.123	0.058	0.03	0.863	-0.02	0.12	0	0.08	0.95	0	0	0	0	0.954	0	0	0	no fragment overlap	0	0	0	0	no fragment overlap	0	0	0	0	no fragment overlap	0	0	0	0	no fragment overlap	0
367	39	2,3-DIMETHYLBUTANE	1-Butanol	000079-29-8	C6H14	dry	3.97	3.524	3.934	3.596	3.722	0.945	0.126	0.056	0.014	0.865	0.02	0.16	0	0.1	0.95	0	0	0	0	0.954	0	0	0	no fragment overlap	0	0	0	0	no fragment overlap	0	0	0	0	no fragment overlap	0	0	0	0	no fragment overlap	0
91	39	HEPTANE	1-Butanol	000142-82-5	C7H16	dry	4.84	4.257	4.812	4.475	4.635	1.105	0.122	0.055	-0.049	1	0	0.2	0	0.05	1.09	0	0	0	0	1.0949	0	0	0	no fragment overlap	0	0	0	0	no fragment overlap	0	0	0	0	no fragment overlap	0	0	0	0	no fragment overlap	0
128	39	OCTANE	1-Butanol	000111-65-9	C8H18	dry	5.37	4.822	5.433	5.119	5.252	1.191	0.126	0.058	-0.057	1.135	0	0.2	0	0.05	1.24	0	0	0	0	1.2358	0	0	0	no fragment overlap	0	0	0	0	no fragment overlap	0	0	0	0	no fragment overlap	0	0	0	0	no fragment overlap	0
74	39	2,4-DIMETHYLPENTANE	1-Butanol	000108-08-7	C7H16	dry	4.642	4.084	4.522	4.235	4.293	1.061	0.115	0.06	0.017	0.995	0.02	0.16	0	0.1	1.09	0	0	0	0	1.0949	0	0	0	no fragment overlap	0	0	0	0	no fragment overlap	0	0	0	0	no fragment overlap	0	0	0	0	no fragment overlap	0
1693	39	CYCLOPROPANE	1-Butanol	000075-19-4	C3H6	dry	1.81	1.643	1.813	1.47	1.729	0.657	0.3	0.037	0.018	0.435	0.22	0.27	0	0.01	0.42	0.17	0	0	0	0.4227	0.6481	51.2	0.0383		0	0	0	0	no fragment overlap	0	0	0	0	no fragment overlap	0	0	0	0	no fragment overlap	0
401	39	ETHYLCYCLOHEXANE	1-Butanol	001678-91-7	C8H16	dry	5.022	4.37	4.743	4.563	4.57	1.189	0.18	0.044	-0.003	1.035	0.22	0.27	0	0.05	1.13	0.26	0.18	0	0	1.1272	0.6786	58.3	0.003		0	0.5193	29.6	0.0021		0	0	0	0	no fragment overlap	0	0	0	0	no fragment overlap	0
1053	39	ETHYLENE	1-Butanol	000074-85-1	C2H4	dry	1.28	1.135	1.316	0.874	1.248	0.621	0.325	0.044	0.022	0.329	0.1	0.19	0	0.07	0.35	0.12	0.11	0	0.07	0.3474	0.5931	40.1	0.0018		0	0.3517	14.4	0.0009	low similarity	1	0	0	0	no fragment overlap	0	0.6727	62.8	0.002		0
1055	39	PROPYLENE	1-Butanol	000115-07-1	C3H6	dry	2	1.614	1.857	1.427	1.782	0.74	0.33	0.039	0.029	0.456	0.13	0.24	0	0.08	0.49	0.12	0.11	0	0.07	0.4883	0.5931	40.1	0.0018		0	0.3517	14.4	0.0009	low similarity	1	0	0	0	no fragment overlap	0	0.6727	62.8	0.002		0
368	39	1-BUTENE	1-Butanol	000106-98-9	C4H8	dry	2.48	2.177	2.443	2.07	2.351	0.849	0.318	0.041	0.031	0.585	0.13	0.24	0	0.09	0.63	0.12	0.11	0	0.07	0.6292	0.5931	40.1	0.0018		0	0.3517	14.4	0.0009	low similarity	1	0	0	0	no fragment overlap	0	0.6727	62.8	0.002		0
457	39	ISOBUTYLENE	1-Butanol	000115-11-7	C4H8	dry	2.44	2.172	2.307	2.036	2.21	0.859	0.34	0.043	0.055	0.58	0.11	0.18	0	0.1	0.63	0.18	0.11	0	0.07	0.6292	0.4198	17.1	0.0718	low similarity	1	0.3517	14.4	0.0009	low similarity	1	0	0	0	no fragment overlap	0	0.6727	62.8	0.002		0
450	39	TRANS-2-BUTENE	1-Butanol	000624-64-6	C4H8	dry	2.55	2.096	2.526	1.985	2.433	0.863	0.3	0.041	0.018	0.586	0.16	0.28	0	0.1	0.63	0.16	0.11	0	0.07	0.6292	0.6665	54.7	0.0092		0	0.3517	14.4	0.0009	low similarity	1	0	0	0	no fragment overlap	0	0.6727	62.8	0.002		0
460	39	CIS-2-BUTENE	1-Butanol	000590-18-1	C4H8	dry	2.62	2.096	2.419	1.985	2.328	0.858	0.321	0.042	0.032	0.58	0.16	0.28	0	0.1	0.63	0.16	0.11	0	0.07	0.6292	0.6665	54.7	0.0092		0	0.3517	14.4	0.0009	low similarity	1	0	0	0	no fragment overlap	0	0.6727	62.8	0.002		0
257	39	1-PENTENE	1-Butanol	000109-67-1	C5H10	dry	3.17	2.741	3.021	2.714	2.908	0.95	0.307	0.046	0.036	0.716	0.13	0.24	0	0.09	0.77	0.12	0.11	0	0.07	0.7701	0.5931	40.1	0.0018		0	0.3517	14.4	0.0009	low similarity	1	0	0	0	no fragment overlap	0	0.6727	62.8	0.002		0
356	39	3-METHYL-1-BUTENE	1-Butanol	000563-45-1	C5H10	dry	3.17	2.654	2.884	2.594	2.757	0.928	0.311	0.045	0.06	0.709	0.13	0.23	0	0.12	0.77	0.12	0.11	0	0.07	0.7701	0.5931	40.1	0.0018		0	0.3517	14.4	0.0009	low similarity	1	0	0	0	no fragment overlap	0	0.6727	62.8	0.002		0
100	39	1-HEXENE	1-Butanol	000592-41-6	C6H12	dry	3.52	3.303	3.543	3.357	3.417	1.074	0.311	0.05	0.045	0.839	0.12	0.25	0	0.09	0.91	0.12	0.11	0	0.07	0.911	0.5931	40.1	0.0018		0	0.3517	14.4	0.0009	low similarity	1	0	0	0	no fragment overlap	0	0.6727	62.8	0.002		0
98	39	2-METHYL-1,3-BUTADIENE	1-Butanol	000078-79-5	C5H8	dry	2.62	2.345	2.472	2.205	2.401	1.114	0.473	0.062	0.105	0.678	0.23	0.24	0	0.16	0.73	0.36	0.23	0	0.14	0.7271	0.4882	24.5	0.3453	structural outlier	2	0.746	61.9	0.0037		0	0	0	0	no fragment overlap	0	0.7461	74.9	0.0081		0
1064	39	ETHYNE	1-Butanol	000074-86-2	C2H2	dry	0.6	0.831	0.643	0.637	0.575	0.508	0.582	0.226	0.082	0.304	0.36	0.39	0.17	0.07	0.3	0.15	0.24	0.05	0.05	0.3044	0.8229	85	0.0332		0	0.7665	67.2	0.0115		0	0.2134	32.2	0.011		0	0.4484	26.2	0.0202		0
1014	39	TETRAFLUOROMETHANE[R14]	1-Butanol	000075-73-0	CF4	dry	1.48	1.3	2.503	1.166	2.302	-0.006	-0.061	0.046	-0.133	0.426	-0.47	-0.03	0	0	0.32	-0.49	-0.42	0	0	0.3203	0.6313	47.7	0.2027	high leverage	1	0.0106	0.1	0.2389	out of domain structural outlier	2	0	0	0	no fragment overlap	0	0	0	0	no fragment overlap	0
911	39	1,1-DIFLUOROETHANE	1-Butanol	000075-37-6	C2H4F2	dry	0.92	1.725	1.126	1.672	1.012	0.307	0.487	0.106	0.125	0.459	-0.22	0.08	0.09	0	0.43	-0.2	0	0	0	0.4258	0.5724	36.2	0.0116		0	0	0	0	no fragment overlap	0	0	0	0	no fragment overlap	0	0	0	0	no fragment overlap	0
47	39	CHLOROFORM	1-Butanol	000067-66-3	CHCl3	dry	2.16	2.264	2.483	2.322	2.443	0.81	0.521	0.172	0.005	0.629	0.34	0.48	0.12	0	0.62	0.39	0.45	0	0	0.6167	0.6073	43.5	0.0197		0	0.578	36.6	0.0035		0	0	0	0	no fragment overlap	0	0	0	0	no fragment overlap	0
157	39	TETRACHLOROMETHANE	1-Butanol	000056-23-5	CCl4	dry	2.9	2.734	3.405	2.798	3.307	0.926	0.298	0.067	-0.016	0.759	0.42	0.55	0	0	0.74	0.52	0.6	0	0	0.7391	0.4857	24.2	0.0349	low similarity	1	0.6167	41.8	0.0062		0	0	0	0	no fragment overlap	0	0	0	0	no fragment overlap	0
332	39	1-CHLOROPROPANE	1-Butanol	000540-54-5	C3H7Cl	dry	2.08	2.401	2.16	2.388	2.082	0.8	0.451	0.051	0.094	0.619	0.13	0.32	0	0.03	0.65	0.2	0.32	0	0	0.6537	0.7377	69.2	0.0066		0	0.7947	71.2	0.0103		0	0	0	0	no fragment overlap	0	0	0	0	no fragment overlap	0
30856	39	ETHYLBROMIDE	1-Butanol	000074-96-4	C2H5Br	dry	1.68	2.031	1.727	1.944	1.673	0.817	0.494	0.055	0.103	0.533	0.31	0.4	0	0.03	0.57	0.34	0.39	0	0.09	0.5654	0.8018	81.2	0.019		0	0.9742	99	0.0263		0	0	0	0	no fragment overlap	0	0.8791	91	0.0371		0
1946	39	1,2-DIFLUORO-1,1,2,2-TETRACHLOROETHANE	1-Butanol	000076-12-0	C2Cl4F2	dry	3.35	3.268	4.21	3.327	4.013	0.806	0.213	0.086	0.011	0.968	0.42	0.45	0	0.08	0.92	0.38	0.16	0	0	0.9154	0.7581	73.3	0.1883	high leverage	1	0.453	23.2	0.1116	high leverage low similarity	1	0	0	0	no fragment overlap	0	0	0	0	no fragment overlap	0
12	39	DIETHYLETHER	1-Butanol	000060-29-7	C4H10O	dry	1.1	1.815	1.875	1.689	1.641	0.764	0.367	0.029	0.262	0.69	0.04	0.34	0	0.25	0.73	0	0.26	0	0.51	0.7309	0	0	0	no fragment overlap	0	0.7658	66.6	0.0255		0	0	0	0	no fragment overlap	0	0	0	0.3439	out of domain structural outlier	2
338	39	DIPROPYLETHER	1-Butanol	000111-43-3	C6H14O	dry	2.18	2.938	2.989	2.971	2.732	0.978	0.366	0.034	0.267	0.942	0.04	0.35	0	0.25	1.01	0	0.18	0	0.34	1.0127	0	0	0	no fragment overlap	0	0.7709	68	0.0121		0	0	0	0	no fragment overlap	0	0.4954	33.1	0.005		0
57	39	DIBUTYLETHER	1-Butanol	000142-96-1	C8H18O	dry	3.23	4.066	4.125	4.259	3.865	1.189	0.394	0.035	0.266	1.202	0.04	0.35	0	0.26	1.29	0	0.18	0	0.41	1.2945	0	0	0	no fragment overlap	0	0.7709	68	0.0121		0	0	0	0	no fragment overlap	0	0.7666	78.4	0.0424		0
75	39	1,4-DIOXANE	1-Butanol	000123-91-1	C4H8O2	dry	-0.36	0.695	-0.079	0.393	-0.289	0.729	0.837	0.011	0.592	0.668	0.29	0.58	0	0.44	0.68	0.37	0.53	0	0.68	0.681	0.5033	27	0.0243		0	0.5954	38.4	0.0501		0	0	0	0	no fragment overlap	0	0.1703	3.2	0.0199	out of domain	2
229	39	2-PROPENAL	1-Butanol	000107-02-8	C3H4O	dry	-0.16	0.007	-0.006	-0.28	-0.126	0.722	0.776	0.065	0.404	0.489	0.36	0.78	0	0.37	0.5	0.29	0.74	0	0.35	0.504	0.4522	21.3	0.0179	low similarity	1	0.8275	75	0.0221		0	0	0	0	no fragment overlap	0	0.5112	35.5	0.0066		0
4	39	ACETONE	1-Butanol	000067-64-1	C3H6O	dry	-0.22	0.392	-0.184	0.159	-0.389	0.63	0.712	0.046	0.485	0.515	0.22	0.67	0	0.34	0.55	0.12	0.64	0	0.5	0.547	0.5931	40.1	0.0018		0	0.6565	47.5	0.0268		0	0	0	0	no fragment overlap	0	0.334	13	0.0452	low similarity	1
40	39	2-BUTANONE	1-Butanol	000078-93-3	C4H8O	dry	0.3	0.956	0.541	0.803	0.324	0.692	0.668	0.033	0.461	0.649	0.21	0.67	0	0.34	0.69	0.12	0.63	0	0.48	0.6879	0.5931	40.1	0.0018		0	0.891	87.7	0.0084		0	0	0	0	no fragment overlap	0	0.4432	25.5	0.0579		0
21	39	ETHYLACETATE	1-Butanol	000141-78-6	C4H8O2	dry	0.75	1.154	0.715	1.02	0.522	0.667	0.735	0.033	0.464	0.716	0.07	0.58	0	0.36	0.75	0.07	0.62	0	0.48	0.7466	0.8503	90.3	0.0205		0	0.7051	54.7	0.0219		0	0	0	0	no fragment overlap	0	0.7374	72.8	0.0319		0
3	39	ACETONITRILE	1-Butanol	000075-05-8	C2H3N	dry	-0.25	0.259	-0.625	0.09	-0.742	0.504	0.837	0.106	0.417	0.391	0.19	0.72	0	0.2	0.4	0.17	0.56	0.05	0.18	0.4042	0.8597	91.7	0.0113		0	0.2974	9.7	0.0109	low similarity	1	0.2134	32.2	0.011		0	0.4544	26.8	0.0194		0
178	39	METHYLAMINE	1-Butanol	000074-89-5	CH5N	dry	-1.22	-1.108	-0.371	-1.601	-0.818	0.571	0.359	0.279	0.435	0.322	0.21	0.49	0.21	0.57	0.35	0.26	0.32	0.27	0.26	0.3493	0.558	33.7	0.0112		0	0.6992	53.5	0.0019		0	0	0	0.012	out of domain	2	0.1311	1.3	0.0062	out of domain	2
533	39	TRIMETHYLAMINE	1-Butanol	000075-50-3	C3H9N	dry	-0.22	0.352	1.535	-0.104	1.252	0.798	0.283	0.066	0.264	0.581	0.17	0.36	0	0.53	0.63	0.17	0.32	0	0.62	0.6311	0.2386	5.8	0.0025	low similarity	1	0.6992	53.5	0.0019		0	0	0	0	no fragment overlap	0	0.3054	11	0.2454	high leverage low similarity	1
110	39	METHANOL	1-Butanol	000067-56-1	CH4O	dry	-0.72	-0.164	-0.496	-0.407	-0.956	0.473	0.549	0.586	0.378	0.295	0.21	0.44	0.31	0.3	0.31	0.19	0.28	0.31	0.2	0.3082	0.0194	1.9	0.0022	out of domain	2	0.2446	7.5	0.0017	low similarity	1	0	0	0.0086	out of domain	2	0	0	0.0014	out of domain	2
11	39	ETHANOL	1-Butanol	000064-17-5	C2H6O	dry	-0.11	0.4	0.054	0.237	-0.426	0.564	0.522	0.562	0.391	0.424	0.21	0.45	0.31	0.31	0.45	0.19	0.37	0.33	0.33	0.4491	0.0194	1.9	0.0022	out of domain	2	0.8374	76.4	0.0078		0	0.296	43.7	0.034		0	0.3233	12.3	0.0151	low similarity	1
140	39	1-PROPANOL	1-Butanol	000071-23-8	C3H8O	dry	0.27	0.962	0.552	0.88	0.076	0.643	0.538	0.528	0.406	0.556	0.21	0.45	0.31	0.31	0.59	0.19	0.37	0.33	0.39	0.59	0.0194	1.9	0.0022	out of domain	2	0.8374	76.4	0.0078		0	0.296	43.7	0.034		0	0.3558	14.6	0.0213	low similarity	1
95	39	2-PROPANOL	1-Butanol	000067-63-0	C3H8O	dry	0.2	0.876	0.501	0.76	0.015	0.654	0.524	0.513	0.422	0.554	0.22	0.43	0.31	0.34	0.59	0.19	0.28	0.31	0.42	0.59	0.0194	1.9	0.0022	out of domain	2	0.2446	7.5	0.0017	low similarity	1	0	0	0.0086	out of domain	2	0	0	0.1444	out of domain	2
39	39	1-BUTANOL	1-Butanol	000071-36-3	C4H10O	dry	1.01	1.526	1.127	1.524	0.614	0.75	0.524	0.567	0.409	0.682	0.2	0.46	0.31	0.31	0.73	0.19	0.37	0.36	0.47	0.7309	0.0194	1.9	0.0022	out of domain	2	0.8374	76.4	0.0078		0	0.4208	54.5	0.0196		0	0.9246	94.4	0.0188		0
120	39	2-METHYL-1-PROPANOL	1-Butanol	000078-83-1	C4H10O	dry	0.91	1.44	1.304	1.404	0.834	0.756	0.523	0.552	0.358	0.676	0.21	0.44	0.31	0.34	0.73	0.19	0.37	0.27	0.33	0.7309	0.0194	1.9	0.0022	out of domain	2	0.8374	76.4	0.0078		0	0.6981	79.2	0.0972	high leverage	1	0.3233	12.3	0.0151	low similarity	1
22	39	2-BUTANOL	1-Butanol	000078-92-2	C4H10O	dry	0.64	1.44	1.298	1.404	0.843	0.743	0.517	0.503	0.365	0.682	0.21	0.44	0.31	0.34	0.73	0.19	0.28	0.31	0.51	0.7309	0.0194	1.9	0.0022	out of domain	2	0.2446	7.5	0.0017	low similarity	1	0	0	0.0086	out of domain	2	0.7584	77.3	0.0354		0
153	39	TERT-BUTANOL	1-Butanol	000075-65-0	C4H10O	dry	0.48	1.461	0.879	1.408	0.359	0.744	0.515	0.489	0.469	0.679	0.19	0.39	0.31	0.35	0.73	0.19	0.28	0.31	0.86	0.7309	0.0194	1.9	0.0022	out of domain	2	0.2446	7.5	0.0017	low similarity	1	0	0	0.0086	out of domain	2	0	0	0.6767	out of domain structural outlier	2
136	39	1-PENTANOL	1-Butanol	000071-41-0	C5H12O	dry	1.61	2.09	1.739	2.168	1.232	0.841	0.536	0.566	0.398	0.814	0.2	0.46	0.31	0.32	0.87	0.19	0.47	0.36	0.47	0.8718	0.0194	1.9	0.0022	out of domain	2	0.8971	89.3	0.0182		0	0.4208	54.5	0.0196		0	0.9246	94.4	0.0188		0
31	39	BENZENE	1-Butanol	000071-43-2	C6H6	dry	2.24	2.082	2.346	2.046	2.346	1.173	0.598	0.059	0.102	0.674	0.56	0.69	0	0.12	0.72	0.58	0.6	0	0.13	0.7164	0.3858	14.7	0.0092	low similarity	1	0.7874	70.4	0.0024		0	0	0	0	no fragment overlap	0	0.6062	49.6	0.0039		0
161	39	TOLUENE	1-Butanol	000108-88-3	C7H8	dry	2.66	2.738	2.852	2.753	2.837	1.315	0.606	0.056	0.121	0.802	0.58	0.63	0	0.12	0.86	0.63	0.62	0	0.16	0.8573	0.5953	40.7	0.0035		0	0.8573	81	0.0021		0	0	0	0	no fragment overlap	0	0.7763	79.5	0.0029		0
25	39	ETHYLBENZENE	1-Butanol	000100-41-4	C8H10	dry	3.068	3.301	3.368	3.396	3.343	1.428	0.614	0.054	0.132	0.928	0.58	0.64	0	0.12	1	0.63	0.48	0	0.17	0.9982	0.5953	40.7	0.0035		0	0.942	96.3	0.011		0	0	0	0	no fragment overlap	0	0.8392	87.5	0.0042		0
123	39	NAPHTHALENE	1-Butanol	000091-20-3	C10H8	dry	3.47	3.309	3.362	3.344	3.464	2.055	0.936	0.077	0.202	1.018	1.27	1.02	0	0.17	1.09	1.28	0.93	0	0.18	1.0854	0.4324	18.5	0.0099	low similarity	1	0.7946	71.1	0.0038		0	0	0	0	no fragment overlap	0	0.6351	55.2	0.007		0
1169	39	ACENAPHTHYLENE-1,2-DIHYDRO	1-Butanol	000083-32-9	C12H10	dry	3.946	4.259	3.985	4.325	4.073	2.33	0.96	0.055	0.247	1.19	1.53	0.99	0	0.15	1.26	1.58	1.07	0	0.27	1.2586	0.6334	47.9	0.1371	high leverage	1	0.6768	50.5	0.0085		0	0	0	0	no fragment overlap	0	0.7471	75.1	0.0146		0
1183	39	FLUORANTHENE	1-Butanol	000206-44-0	C16H10	dry	4.951	5.055	4.785	5.106	5.006	3.527	1.389	0.112	0.37	1.495	2.6	1.52	0	0.25	1.58	2.27	1.53	0	0.32	1.5846	0.1058	2.8	0.3054	out of domain structural outlier	2	0.5354	31.6	0.0121		0	0	0	0	no fragment overlap	0	0.4466	25.9	0.0269		0
492	39	BENZYLCHLORIDE	1-Butanol	000100-44-7	C7H7Cl	dry	3.09	3.135	2.678	3.24	2.742	1.47	0.948	0.1	0.222	0.936	0.7	0.78	0	0.12	0.98	0.83	0.8	0	0.17	0.9797	0.7005	62.3	0.0099		0	0.6639	48.6	0.0211		0	0	0	0	no fragment overlap	0	0.8392	87.5	0.0042		0
5931	39	METHYL-P-HYDROXYBENZOATE	1-Butanol	000099-76-3	C8H8O3	dry	2.02	0.972	1.865	1.152	1.459	1.483	1.268	0.978	0.511	1.083	0.87	1.24	0.66	0.72	1.13	0.91	1.33	0.7	0.56	1.1313	0.8287	85.8	0.034		0	0.5546	33.6	0.0292		0	0.6017	71.9	0.1114	structural outlier	2	0.772	78.7	0.0107		0
387	39	1,2,4,5-TETRAMETHYLBENZENE	1-Butanol	000095-93-2	C10H14	dry	4.34	4.708	4.337	4.875	4.288	1.757	0.638	0.05	0.173	1.174	0.65	0.46	0	0.12	1.28	0.72	0.65	0	0.35	1.28	0.7406	70.1	0.0066		0	0.6885	52.1	0.0171		0	0	0	0	no fragment overlap	0	0.4189	22.2	0.0813	low similarity	1
1064	39	ETHYNE	1-Butanol	000074-86-2	C2H2	dry	0.6	0.831	0.643	0.637	0.575	0.508	0.582	0.226	0.082	0.304	0.36	0.39	0.17	0.07	0.3	0.15	0.24	0.05	0.05	0.3044	0.8229	85	0.0332		0	0.7665	67.2	0.0115		0	0.2134	32.2	0.011		0	0.4484	26.2	0.0202		0
1533	39	2,6-DIMETHYLNAPHTHALENE	1-Butanol	000581-42-0	C12H12	dry	4.37	4.62	4.438	4.756	4.528	2.458	0.969	0.07	0.236	1.278	1.32	0.9	0	0.17	1.37	1.35	0.95	0	0.23	1.3672	0.7468	71.4	0.0054		0	0.7523	63.3	0.0052		0	0	0	0	no fragment overlap	0	0.8967	92.8	0.0078		0
1181	39	9H-FLUORENE	1-Butanol	000086-73-7	C13H10	dry	4.259	4.405	3.977	4.516	4.116	2.587	1.163	0.082	0.311	1.279	1.65	1.13	0	0.19	1.36	1.69	1.16	0	0.37	1.3565	0.3057	9.5	0.5967	structural outlier	2	0.6605	48.1	0.0851	high leverage	1	0	0	0	no fragment overlap	0	0.4173	22	0.0204	low similarity	1
5441	39	MONURON	1-Butanol	000150-68-5	C9H11ClN2O	dry	2.105	1.629	2.757	1.78	2.585	2.143	1.361	0.419	0.63	1.382	1.16	1.59	0.37	0.84	1.48	1.29	1.5	0.38	0.84	1.4768	0.7036	62.8	0.0547		0	0.638	45.1	0.0507		0	0.0686	5.8	0.0165	low similarity	1	0.7017	67.8	0.0455		0
5954	39	PHENACETIN	1-Butanol	000062-44-2	C10H13NO2	dry	1.712	1.353	2.099	1.528	1.798	2.007	1.37	0.497	0.765	1.366	0.96	1.55	0.41	0.87	1.45	0.93	1.4	0.38	0.8	1.4542	0.8758	94.1	0.1723	high leverage	1	0.7026	54.5	0.1019	high leverage	1	0.0686	5.8	0.0165	low similarity	1	0.7315	71.7	0.0291		0
6465	39	ACETAMINOPHEN	1-Butanol	000103-90-2	C8H9NO2	dry	0.714	-0.045	1.115	0.202	0.455	1.657	1.339	1.281	0.732	1.106	1.12	1.66	0.91	0.93	1.17	1.07	1.82	0.91	0.75	1.1724	0.7434	70.8	0.1979	high leverage	1	0.7737	68.4	0.1222	high leverage	1	0.0414	2.8	0.0603	out of domain	2	0.7903	82.1	0.0205		0
40086	39	Trimethoprim	1-Butanol	000738-70-5	C14H18N4O3	dry	0.699	0.413	1.413	0.533	0.588	2.863	1.918	0.915	1.604	2.053	2.04	2.81	0.45	1.62	2.18	2.14	2.62	0.55	1.74	2.1813	0.6533	52.1	0.0715		0	0.4964	27.6	0.1831	structural outlier	2	0	0	0.048	out of domain	2	0.3959	19.8	0.0772	low similarity	1
31691	39	THIOUREA	1-Butanol	000062-56-6	CH4N2S	dry	-1.143	-1.334	0.476	-1.862	-0.124	1.082	1.059	1.492	0.332	0.547	1.07	0.97	0.42	0.82	0.57	0.97	2.35	0.55	0.69	0.5696	0.4086	16.4	0.047	low similarity	1	0.183	3.4	1.3603	leverage > 1	3	0	0	0.048	out of domain	2	0.4542	26.7	0.0324		0
5972	39	DIPHENYL-SULFONE	1-Butanol	000127-63-9	C12H10O2S	dry	2.4	2.063	2.562	2.288	2.529	2.327	1.549	0.124	0.769	1.508	1.26	2.01	0	0.74	1.61	1.49	2.02	0	0.77	1.6051	0.4724	23.2	0.0293	low similarity	1	0.4865	26.6	0.0247		0	0	0	0	no fragment overlap	0	0.6377	55.7	0.0197		0
1051	136	METHANE	1-Pentanol	000074-82-8	CH4	dry	1.13	0.857	1.286	0.577	1.173	0.516	0.15	0.035	-0.042	0.228	0.11	0.21	0	0.01	0.25	0	0	0	0	0.2495	0	0	0	no fragment overlap	0	0	0	0	no fragment overlap	0	0	0	0	no fragment overlap	0	0	0	0	no fragment overlap	0
316	136	2-METHYLPROPANE	1-Pentanol	000075-28-5	C4H10	dry	3.01	2.448	3.096	2.465	2.993	0.773	0.127	0.044	-0.043	0.618	0.01	0.17	0	0.06	0.67	0	0	0	0	0.6722	0	0	0	no fragment overlap	0	0	0	0	no fragment overlap	0	0	0	0	no fragment overlap	0	0	0	0	no fragment overlap	0
134	136	PENTANE	1-Pentanol	000109-66-0	C5H12	dry	3.64	3.107	3.787	3.252	3.691	0.876	0.106	0.049	-0.06	0.747	0	0.19	0	0.04	0.81	0	0	0	0	0.8131	0	0	0	no fragment overlap	0	0	0	0	no fragment overlap	0	0	0	0	no fragment overlap	0	0	0	0	no fragment overlap	0
89	136	HEXANE	1-Pentanol	000110-54-3	C6H14	dry	4.26	3.683	4.373	3.928	4.292	0.98	0.097	0.055	-0.055	0.875	0	0.19	0	0.04	0.95	0	0	0	0	0.954	0	0	0	no fragment overlap	0	0	0	0	no fragment overlap	0	0	0	0	no fragment overlap	0	0	0	0	no fragment overlap	0
112	136	3-METHYLPENTANE	1-Pentanol	000096-14-0	C6H14	dry	4.28	3.599	4.161	3.818	4.09	0.955	0.111	0.057	-0.014	0.87	0.01	0.18	0	0.07	0.95	0	0	0	0	0.954	0	0	0	no fragment overlap	0	0	0	0	no fragment overlap	0	0	0	0	no fragment overlap	0	0	0	0	no fragment overlap	0
370	136	2,2-DIMETHYLBUTANE	1-Pentanol	000075-83-2	C6H14	dry	3.99	3.623	3.948	3.839	3.904	0.961	0.123	0.058	0.03	0.863	-0.02	0.12	0	0.08	0.95	0	0	0	0	0.954	0	0	0	no fragment overlap	0	0	0	0	no fragment overlap	0	0	0	0	no fragment overlap	0	0	0	0	no fragment overlap	0
367	136	2,3-DIMETHYLBUTANE	1-Pentanol	000079-29-8	C6H14	dry	4.03	3.518	4.006	3.712	3.943	0.945	0.126	0.056	0.014	0.865	0.02	0.16	0	0.1	0.95	0	0	0	0	0.954	0	0	0	no fragment overlap	0	0	0	0	no fragment overlap	0	0	0	0	no fragment overlap	0	0	0	0	no fragment overlap	0
128	136	OCTANE	1-Pentanol	000111-65-9	C8H18	dry	5.5	4.833	5.548	5.28	5.457	1.191	0.126	0.058	-0.057	1.135	0	0.2	0	0.05	1.24	0	0	0	0	1.2358	0	0	0	no fragment overlap	0	0	0	0	no fragment overlap	0	0	0	0	no fragment overlap	0	0	0	0	no fragment overlap	0
97	136	2,2,4-TRIMETHYLPENTANE	1-Pentanol	000540-84-1	C8H18	dry	4.97	4.693	4.863	5.085	4.852	1.167	0.149	0.063	0.081	1.11	-0.01	0.12	0	0.11	1.24	0	0	0	0	1.2358	0	0	0	no fragment overlap	0	0	0	0	no fragment overlap	0	0	0	0	no fragment overlap	0	0	0	0	no fragment overlap	0
55	136	METHYLCYCLOPENTANE	1-Pentanol	000096-37-7	C6H12	dry	3.74	3.232	3.851	3.329	3.776	0.988	0.156	0.043	-0.033	0.789	0.22	0.26	0	0.05	0.85	0.27	0.28	0	0	0.8454	0.7041	62.9	0.0774		0	0.5755	36.4	0.0059		0	0	0	0	no fragment overlap	0	0	0	0	no fragment overlap	0
1053	136	ETHYLENE	1-Pentanol	000074-85-1	C2H4	dry	1.29	1.08	1.291	0.833	1.109	0.621	0.325	0.044	0.022	0.329	0.1	0.19	0	0.07	0.35	0.12	0.11	0	0.07	0.3474	0.5931	40.1	0.0018		0	0.3517	14.4	0.0009	low similarity	1	0	0	0	no fragment overlap	0	0.6727	62.8	0.002		0
1055	136	PROPYLENE	1-Pentanol	000115-07-1	C3H6	dry	1.94	1.568	1.852	1.407	1.689	0.74	0.33	0.039	0.029	0.456	0.13	0.24	0	0.08	0.49	0.12	0.11	0	0.07	0.4883	0.5931	40.1	0.0018		0	0.3517	14.4	0.0009	low similarity	1	0	0	0	no fragment overlap	0	0.6727	62.8	0.002		0
368	136	1-BUTENE	1-Pentanol	000106-98-9	C4H8	dry	2.48	2.142	2.46	2.083	2.315	0.849	0.318	0.041	0.031	0.585	0.13	0.24	0	0.09	0.63	0.12	0.11	0	0.07	0.6292	0.5931	40.1	0.0018		0	0.3517	14.4	0.0009	low similarity	1	0	0	0	no fragment overlap	0	0.6727	62.8	0.002		0
460	136	CIS-2-BUTENE	1-Pentanol	000590-18-1	C4H8	dry	2.63	2.059	2.436	1.985	2.294	0.858	0.321	0.042	0.032	0.58	0.16	0.28	0	0.1	0.63	0.16	0.11	0	0.07	0.6292	0.6665	54.7	0.0092		0	0.3517	14.4	0.0009	low similarity	1	0	0	0	no fragment overlap	0	0.6727	62.8	0.002		0
457	136	ISOBUTYLENE	1-Pentanol	000115-11-7	C4H8	dry	2.33	2.143	2.322	2.07	2.183	0.859	0.34	0.043	0.055	0.58	0.11	0.18	0	0.1	0.63	0.18	0.11	0	0.07	0.6292	0.4198	17.1	0.0718	low similarity	1	0.3517	14.4	0.0009	low similarity	1	0	0	0	no fragment overlap	0	0.6727	62.8	0.002		0
100	136	1-HEXENE	1-Pentanol	000592-41-6	C6H12	dry	3.58	3.292	3.602	3.434	3.49	1.074	0.311	0.05	0.045	0.839	0.12	0.25	0	0.09	0.91	0.12	0.11	0	0.07	0.911	0.5931	40.1	0.0018		0	0.3517	14.4	0.0009	low similarity	1	0	0	0	no fragment overlap	0	0.6727	62.8	0.002		0
600	136	1-HEPTENE	1-Pentanol	000592-76-7	C7H14	dry	4.1	3.867	4.205	4.111	4.091	1.181	0.321	0.052	0.044	0.971	0.12	0.25	0	0.1	1.05	0.12	0.11	0	0.07	1.0519	0.5931	40.1	0.0018		0	0.3517	14.4	0.0009	low similarity	1	0	0	0	no fragment overlap	0	0.6727	62.8	0.002		0
1014	136	TETRAFLUOROMETHANE[R14]	1-Pentanol	000075-73-0	CF4	dry	1.44	1.22	2.478	1.167	2.182	-0.006	-0.061	0.046	-0.133	0.426	-0.47	-0.03	0	0	0.32	-0.49	-0.42	0	0	0.3203	0.6313	47.7	0.2027	high leverage	1	0.0106	0.1	0.2389	out of domain structural outlier	2	0	0	0	no fragment overlap	0	0	0	0	no fragment overlap	0
580	136	DIMETHYLETHER	1-Pentanol	000115-10-6	C2H6O	dry	0.05	0.623	0.565	0.36	0.459	0.572	0.432	0.018	0.271	0.428	0.05	0.33	0	0.24	0.45	0	0.28	0	0.24	0.4491	0	0	0	no fragment overlap	0	0.7078	55.3	0.0125		0	0	0	0	no fragment overlap	0	0.2	5	0.014	low similarity	1
12	136	DIETHYLETHER	1-Pentanol	000060-29-7	C4H10O	dry	1.12	1.773	1.889	1.711	1.824	0.764	0.367	0.029	0.262	0.69	0.04	0.34	0	0.25	0.73	0	0.26	0	0.51	0.7309	0	0	0	no fragment overlap	0	0.7658	66.6	0.0255		0	0	0	0	no fragment overlap	0	0	0	0.3439	out of domain structural outlier	2
313	136	BUTANAL	1-Pentanol	000123-72-8	C4H8O	dry	0.38	0.886	0.81	0.727	0.637	0.714	0.641	0.025	0.391	0.644	0.24	0.73	0	0.32	0.69	0.17	0.63	0	0.46	0.6879	0.4992	26	0.0159		0	0.9083	90.7	0.0221		0	0	0	0	no fragment overlap	0	0.9763	100	0.1445	high leverage	1
229	136	2-PROPENAL	1-Pentanol	000107-02-8	C3H4O	dry	-0.15	-0.079	-0.056	-0.442	-0.294	0.722	0.776	0.065	0.404	0.489	0.36	0.78	0	0.37	0.5	0.29	0.74	0	0.35	0.504	0.4522	21.3	0.0179	low similarity	1	0.8275	75	0.0221		0	0	0	0	no fragment overlap	0	0.5112	35.5	0.0066		0
4	136	ACETONE	1-Pentanol	000067-64-1	C3H6O	dry	-0.3	0.311	-0.232	0.038	-0.397	0.63	0.712	0.046	0.485	0.515	0.22	0.67	0	0.34	0.55	0.12	0.64	0	0.5	0.547	0.5931	40.1	0.0018		0	0.6565	47.5	0.0268		0	0	0	0	no fragment overlap	0	0.334	13	0.0452	low similarity	1
40	136	2-BUTANONE	1-Pentanol	000078-93-3	C4H8O	dry	0.13	0.886	0.512	0.715	0.358	0.692	0.668	0.033	0.461	0.649	0.21	0.67	0	0.34	0.69	0.12	0.63	0	0.48	0.6879	0.5931	40.1	0.0018		0	0.891	87.7	0.0084		0	0	0	0	no fragment overlap	0	0.4432	25.5	0.0579		0
21	136	ETHYLACETATE	1-Pentanol	000141-78-6	C4H8O2	dry	0.68	1.088	0.683	0.978	0.454	0.667	0.735	0.033	0.464	0.716	0.07	0.58	0	0.36	0.75	0.07	0.62	0	0.48	0.7466	0.8503	90.3	0.0205		0	0.7051	54.7	0.0219		0	0	0	0	no fragment overlap	0	0.7374	72.8	0.0319		0
956	136	BUTYRONITRILE	1-Pentanol	000109-74-0	C4H7N	dry	0.61	1.305	0.531	1.248	0.277	0.702	0.763	0.051	0.427	0.649	0.19	0.73	0	0.21	0.69	0.17	0.56	0	0.3	0.686	0.8597	91.7	0.0113		0	0.2974	9.7	0.0109	low similarity	1	1	95.7	0.0385		0	0.7429	73.4	0.0382		0
110	136	METHANOL	1-Pentanol	000067-56-1	CH4O	dry	-0.67	-0.205	-0.498	-0.429	-0.923	0.473	0.549	0.586	0.378	0.295	0.21	0.44	0.31	0.3	0.31	0.19	0.28	0.31	0.2	0.3082	0.0194	1.9	0.0022	out of domain	2	0.2446	7.5	0.0017	low similarity	1	0	0	0.0086	out of domain	2	0	0	0.0014	out of domain	2
11	136	ETHANOL	1-Pentanol	000064-17-5	C2H6O	dry	-0.26	0.37	0.071	0.247	-0.309	0.564	0.522	0.562	0.391	0.424	0.21	0.45	0.31	0.31	0.45	0.19	0.37	0.33	0.33	0.4491	0.0194	1.9	0.0022	out of domain	2	0.8374	76.4	0.0078		0	0.296	43.7	0.034		0	0.3233	12.3	0.0151	low similarity	1
140	136	1-PROPANOL	1-Pentanol	000071-23-8	C3H8O	dry	0.42	0.944	0.582	0.922	0.215	0.643	0.538	0.528	0.406	0.556	0.21	0.45	0.31	0.31	0.59	0.19	0.37	0.33	0.39	0.59	0.0194	1.9	0.0022	out of domain	2	0.8374	76.4	0.0078		0	0.296	43.7	0.034		0	0.3558	14.6	0.0213	low similarity	1
95	136	2-PROPANOL	1-Pentanol	000067-63-0	C3H8O	dry	0.18	0.86	0.531	0.813	0.2	0.654	0.524	0.513	0.422	0.554	0.22	0.43	0.31	0.34	0.59	0.19	0.28	0.31	0.42	0.59	0.0194	1.9	0.0022	out of domain	2	0.2446	7.5	0.0017	low similarity	1	0	0	0.0086	out of domain	2	0	0	0.1444	out of domain	2
39	136	1-BUTANOL	1-Pentanol	000071-36-3	C4H10O	dry	0.99	1.519	1.182	1.599	0.816	0.75	0.524	0.567	0.409	0.682	0.2	0.46	0.31	0.31	0.73	0.19	0.37	0.36	0.47	0.7309	0.0194	1.9	0.0022	out of domain	2	0.8374	76.4	0.0078		0	0.4208	54.5	0.0196		0	0.9246	94.4	0.0188		0
136	136	1-PENTANOL	1-Pentanol	000071-41-0	C5H12O	dry	1.6	2.095	1.812	2.275	1.431	0.841	0.536	0.566	0.398	0.814	0.2	0.46	0.31	0.32	0.87	0.19	0.47	0.36	0.47	0.8718	0.0194	1.9	0.0022	out of domain	2	0.8971	89.3	0.0182		0	0.4208	54.5	0.0196		0	0.9246	94.4	0.0188		0
31	136	BENZENE	1-Pentanol	000071-43-2	C6H6	dry	2.2	2.038	2.367	1.937	2.168	1.173	0.598	0.059	0.102	0.674	0.56	0.69	0	0.12	0.72	0.58	0.6	0	0.13	0.7164	0.3858	14.7	0.0092	low similarity	1	0.7874	70.4	0.0024		0	0	0	0	no fragment overlap	0	0.6062	49.6	0.0039		0
161	136	TOLUENE	1-Pentanol	000108-88-3	C7H8	dry	2.64	2.715	2.895	2.699	2.728	1.315	0.606	0.056	0.121	0.802	0.58	0.63	0	0.12	0.86	0.63	0.62	0	0.16	0.8573	0.5953	40.7	0.0035		0	0.8573	81	0.0021		0	0	0	0	no fragment overlap	0	0.7763	79.5	0.0029		0
322	136	O-XYLENE	1-Pentanol	000095-47-6	C8H10	dry	3.14	3.391	3.32	3.46	3.173	1.444	0.638	0.053	0.151	0.925	0.61	0.58	0	0.12	1	0.62	0.63	0	0.2	0.9982	0.6549	52.8	0.0067		0	0.8244	74.7	0.0044		0	0	0	0	no fragment overlap	0	0.7527	76.2	0.0069		0
471	136	BIPHENYL	1-Pentanol	000092-52-4	C12H10	dry	4.16	4.041	4.04	4.09	3.904	2.339	1.096	0.088	0.267	1.232	1.39	1.16	0	0.21	1.32	1.32	1.07	0	0.27	1.3242	0.5679	35.5	0.0134		0	0.8607	81.2	0.006		0	0	0	0	no fragment overlap	0	0.6182	52.1	0.0119		0
123	136	NAPHTHALENE	1-Pentanol	000091-20-3	C10H8	dry	3.32	3.319	3.45	3.242	3.332	2.055	0.936	0.077	0.202	1.018	1.27	1.02	0	0.17	1.09	1.28	0.93	0	0.18	1.0854	0.4324	18.5	0.0099	low similarity	1	0.7946	71.1	0.0038		0	0	0	0	no fragment overlap	0	0.6351	55.2	0.007		0
1169	136	ACENAPHTHYLENE-1,2-DIHYDRO	1-Pentanol	000083-32-9	C12H10	dry	4.002	4.309	4.105	4.28	4.08	2.33	0.96	0.055	0.247	1.19	1.53	0.99	0	0.15	1.26	1.58	1.07	0	0.27	1.2586	0.6334	47.9	0.1371	high leverage	1	0.6768	50.5	0.0085		0	0	0	0	no fragment overlap	0	0.7471	75.1	0.0146		0
1183	136	FLUORANTHENE	1-Pentanol	000206-44-0	C16H10	dry	5.041	5.16	4.988	5.003	5.11	3.527	1.389	0.112	0.37	1.495	2.6	1.52	0	0.25	1.58	2.27	1.53	0	0.32	1.5846	0.1058	2.8	0.3054	out of domain structural outlier	2	0.5354	31.6	0.0121		0	0	0	0	no fragment overlap	0	0.4466	25.9	0.0269		0
1181	136	9H-FLUORENE	1-Pentanol	000086-73-7	C13H10	dry	4.321	4.456	4.107	4.453	4.046	2.587	1.163	0.082	0.311	1.279	1.65	1.13	0	0.19	1.36	1.69	1.16	0	0.37	1.3565	0.3057	9.5	0.5967	structural outlier	2	0.6605	48.1	0.0851	high leverage	1	0	0	0	no fragment overlap	0	0.4173	22	0.0204	low similarity	1
5931	136	METHYL-P-HYDROXYBENZOATE	1-Pentanol	000099-76-3	C8H8O3	dry	1.97	1.006	1.976	1.212	1.108	1.483	1.268	0.978	0.511	1.083	0.87	1.24	0.66	0.72	1.13	0.91	1.33	0.7	0.56	1.1313	0.8287	85.8	0.034		0	0.5546	33.6	0.0292		0	0.6017	71.9	0.1114	structural outlier	2	0.772	78.7	0.0107		0
387	136	1,2,4,5-TETRAMETHYLBENZENE	1-Pentanol	000095-93-2	C10H14	dry	4.395	4.748	4.444	4.987	4.374	1.757	0.638	0.05	0.173	1.174	0.65	0.46	0	0.12	1.28	0.72	0.65	0	0.35	1.28	0.7406	70.1	0.0066		0	0.6885	52.1	0.0171		0	0	0	0	no fragment overlap	0	0.4189	22.2	0.0813	low similarity	1
1533	136	2,6-DIMETHYLNAPHTHALENE	1-Pentanol	000581-42-0	C12H12	dry	4.29	4.672	4.577	4.764	4.556	2.458	0.969	0.07	0.236	1.278	1.32	0.9	0	0.17	1.37	1.35	0.95	0	0.23	1.3672	0.7468	71.4	0.0054		0	0.7523	63.3	0.0052		0	0	0	0	no fragment overlap	0	0.8967	92.8	0.0078		0
5441	136	MONURON	1-Pentanol	000150-68-5	C9H11ClN2O	dry	2.073	1.645	2.876	1.752	2.519	2.143	1.361	0.419	0.63	1.382	1.16	1.59	0.37	0.84	1.48	1.29	1.5	0.38	0.84	1.4768	0.7036	62.8	0.0547		0	0.638	45.1	0.0507		0	0.0686	5.8	0.0165	low similarity	1	0.7017	67.8	0.0455		0
25	136	ETHYLBENZENE	1-Pentanol	000100-41-4	C8H10	dry	3.096	3.289	3.43	3.374	3.278	1.428	0.614	0.054	0.132	0.928	0.58	0.64	0	0.12	1	0.63	0.48	0	0.17	0.9982	0.5953	40.7	0.0035		0	0.942	96.3	0.011		0	0	0	0	no fragment overlap	0	0.8392	87.5	0.0042		0
5954	136	PHENACETIN	1-Pentanol	000062-44-2	C10H13NO2	dry	1.56	1.359	2.215	1.515	1.859	2.007	1.37	0.497	0.765	1.366	0.96	1.55	0.41	0.87	1.45	0.93	1.4	0.38	0.8	1.4542	0.8758	94.1	0.1723	high leverage	1	0.7026	54.5	0.1019	high leverage	1	0.0686	5.8	0.0165	low similarity	1	0.7315	71.7	0.0291		0
6465	136	ACETAMINOPHEN	1-Pentanol	000103-90-2	C8H9NO2	dry	0.556	-0.006	1.27	0.224	0.414	1.657	1.339	1.281	0.732	1.106	1.12	1.66	0.91	0.93	1.17	1.07	1.82	0.91	0.75	1.1724	0.7434	70.8	0.1979	high leverage	1	0.7737	68.4	0.1222	high leverage	1	0.0414	2.8	0.0603	out of domain	2	0.7903	82.1	0.0205		0
120	136	2-METHYL-1-PROPANOL	1-Pentanol	000078-83-1	C4H10O	dry	0.9	1.436	1.357	1.489	0.966	0.756	0.523	0.552	0.358	0.676	0.21	0.44	0.31	0.34	0.73	0.19	0.37	0.27	0.33	0.7309	0.0194	1.9	0.0022	out of domain	2	0.8374	76.4	0.0078		0	0.6981	79.2	0.0972	high leverage	1	0.3233	12.3	0.0151	low similarity	1
927	136	PHENANTHRENE	1-Pentanol	000085-01-8	C14H10	dry	4.53	4.596	4.502	4.541	4.515	3.016	1.258	0.111	0.321	1.357	1.99	1.34	0	0.23	1.45	2.07	1.25	0	0.22	1.4544	0.6251	46.3	0.1686	high leverage	1	0.6533	47.1	0.007		0	0	0	0	no fragment overlap	0	0.6043	49.3	0.011		0
31691	136	THIOUREA	1-Pentanol	000062-56-6	CH4N2S	dry	-1.323	-1.325	0.588	-1.879	-0.559	1.082	1.059	1.492	0.332	0.547	1.07	0.97	0.42	0.82	0.57	0.97	2.35	0.55	0.69	0.5696	0.4086	16.4	0.047	low similarity	1	0.183	3.4	1.3603	leverage > 1	3	0	0	0.048	out of domain	2	0.4542	26.7	0.0324		0
5972	136	DIPHENYL-SULFONE	1-Pentanol	000127-63-9	C12H10O2S	dry	2.333	2.007	2.654	2.037	2.466	2.327	1.549	0.124	0.769	1.508	1.26	2.01	0	0.74	1.61	1.49	2.02	0	0.77	1.6051	0.4724	23.2	0.0293	low similarity	1	0.4865	26.6	0.0247		0	0	0	0	no fragment overlap	0	0.6377	55.7	0.0197		0
316	21	2-METHYLPROPANE	Ethyl acetate	000075-28-5	C4H10	dry	3.28	2.733	3.301	2.75	3.173	0.773	0.127	0.044	-0.043	0.618	0.01	0.17	0	0.06	0.67	0	0	0	0	0.6722	0	0	0	no fragment overlap	0	0	0	0	no fragment overlap	0	0	0	0	no fragment overlap	0	0	0	0	no fragment overlap	0
134	21	PENTANE	Ethyl acetate	000109-66-0	C5H12	dry	3.79	3.428	3.964	3.63	3.82	0.876	0.106	0.049	-0.06	0.747	0	0.19	0	0.04	0.81	0	0	0	0	0.8131	0	0	0	no fragment overlap	0	0	0	0	no fragment overlap	0	0	0	0	no fragment overlap	0	0	0	0	no fragment overlap	0
89	21	HEXANE	Ethyl acetate	000110-54-3	C6H14	dry	4.36	3.996	4.509	4.337	4.318	0.98	0.097	0.055	-0.055	0.875	0	0.19	0	0.04	0.95	0	0	0	0	0.954	0	0	0	no fragment overlap	0	0	0	0	no fragment overlap	0	0	0	0	no fragment overlap	0	0	0	0	no fragment overlap	0
91	21	HEPTANE	Ethyl acetate	000142-82-5	C7H16	dry	4.94	4.563	5.033	5.042	4.852	1.105	0.122	0.055	-0.049	1	0	0.2	0	0.05	1.09	0	0	0	0	1.0949	0	0	0	no fragment overlap	0	0	0	0	no fragment overlap	0	0	0	0	no fragment overlap	0	0	0	0	no fragment overlap	0
128	21	OCTANE	Ethyl acetate	000111-65-9	C8H18	dry	5.56	5.131	5.66	5.748	5.502	1.191	0.126	0.058	-0.057	1.135	0	0.2	0	0.05	1.24	0	0	0	0	1.2358	0	0	0	no fragment overlap	0	0	0	0	no fragment overlap	0	0	0	0	no fragment overlap	0	0	0	0	no fragment overlap	0
398	21	NONANE	Ethyl acetate	000111-84-2	C9H20	dry	6.06	5.694	6.175	6.448	6.021	1.328	0.153	0.058	-0.05	1.258	-0.01	0.2	0	0.05	1.38	0	0	0	0	1.3767	0	0	0	no fragment overlap	0	0	0	0	no fragment overlap	0	0	0	0	no fragment overlap	0	0	0	0	no fragment overlap	0
74	21	2,4-DIMETHYLPENTANE	Ethyl acetate	000108-08-7	C7H16	dry	4.78	4.31	4.672	4.693	4.336	1.061	0.115	0.06	0.017	0.995	0.02	0.16	0	0.1	1.09	0	0	0	0	1.0949	0	0	0	no fragment overlap	0	0	0	0	no fragment overlap	0	0	0	0	no fragment overlap	0	0	0	0	no fragment overlap	0
1283	21	2,5-DIMETHYLHEXANE	Ethyl acetate	000592-13-2	C8H18	dry	5.18	4.878	5.284	5.399	4.99	1.155	0.133	0.062	0.01	1.128	0.02	0.17	0	0.1	1.24	0	0	0	0	1.2358	0	0	0	no fragment overlap	0	0	0	0	no fragment overlap	0	0	0	0	no fragment overlap	0	0	0	0	no fragment overlap	0
401	21	ETHYLCYCLOHEXANE	Ethyl acetate	001678-91-7	C8H16	dry	5.12	4.709	4.966	5.145	4.764	1.189	0.18	0.044	-0.003	1.035	0.22	0.27	0	0.05	1.13	0.26	0.18	0	0	1.1272	0.6786	58.3	0.003		0	0.5193	29.6	0.0021		0	0	0	0	no fragment overlap	0	0	0	0	no fragment overlap	0
1055	21	PROPYLENE	Ethyl acetate	000115-07-1	C3H6	dry	2.08	1.884	2.177	1.656	2.236	0.74	0.33	0.039	0.029	0.456	0.13	0.24	0	0.08	0.49	0.12	0.11	0	0.07	0.4883	0.5931	40.1	0.0018		0	0.3517	14.4	0.0009	low similarity	1	0	0	0	no fragment overlap	0	0.6727	62.8	0.002		0
450	21	TRANS-2-BUTENE	Ethyl acetate	000624-64-6	C4H8	dry	3.14	2.386	2.828	2.273	2.832	0.863	0.3	0.041	0.018	0.586	0.16	0.28	0	0.1	0.63	0.16	0.11	0	0.07	0.6292	0.6665	54.7	0.0092		0	0.3517	14.4	0.0009	low similarity	1	0	0	0	no fragment overlap	0	0.6727	62.8	0.002		0
257	21	1-PENTENE	Ethyl acetate	000109-67-1	C5H10	dry	3.4	3.019	3.304	3.068	3.272	0.95	0.307	0.046	0.036	0.716	0.13	0.24	0	0.09	0.77	0.12	0.11	0	0.07	0.7701	0.5931	40.1	0.0018		0	0.3517	14.4	0.0009	low similarity	1	0	0	0	no fragment overlap	0	0.6727	62.8	0.002		0
457	21	ISOBUTYLENE	Ethyl acetate	000115-11-7	C4H8	dry	2.73	2.391	2.601	2.276	2.592	0.859	0.34	0.043	0.055	0.58	0.11	0.18	0	0.1	0.63	0.18	0.11	0	0.07	0.6292	0.4198	17.1	0.0718	low similarity	1	0.3517	14.4	0.0009	low similarity	1	0	0	0	no fragment overlap	0	0.6727	62.8	0.002		0
356	21	3-METHYL-1-BUTENE	Ethyl acetate	000563-45-1	C5H10	dry	3.35	2.893	3.148	2.893	3.075	0.928	0.311	0.045	0.06	0.709	0.13	0.23	0	0.12	0.77	0.12	0.11	0	0.07	0.7701	0.5931	40.1	0.0018		0	0.3517	14.4	0.0009	low similarity	1	0	0	0	no fragment overlap	0	0.6727	62.8	0.002		0
600	21	1-HEPTENE	Ethyl acetate	000592-76-7	C7H14	dry	4.2	4.155	4.398	4.48	4.331	1.181	0.321	0.052	0.044	0.971	0.12	0.25	0	0.1	1.05	0.12	0.11	0	0.07	1.0519	0.5931	40.1	0.0018		0	0.3517	14.4	0.0009	low similarity	1	0	0	0	no fragment overlap	0	0.6727	62.8	0.002		0
364	21	1,3-BUTADIENE	Ethyl acetate	000106-99-0	C4H6	dry	2.53	2.043	2.358	1.799	2.472	1.041	0.495	0.064	0.079	0.554	0.25	0.3	0	0.14	0.59	0.23	0.23	0	0.14	0.5862	0.4203	17.4	0.0071	low similarity	1	0.746	61.9	0.0037		0	0	0	0	no fragment overlap	0	0.7461	74.9	0.0081		0
98	21	2-METHYL-1,3-BUTADIENE	Ethyl acetate	000078-79-5	C5H8	dry	2.91	2.55	2.783	2.419	2.797	1.114	0.473	0.062	0.105	0.678	0.23	0.24	0	0.16	0.73	0.36	0.23	0	0.14	0.7271	0.4882	24.5	0.3453	structural outlier	2	0.746	61.9	0.0037		0	0	0	0	no fragment overlap	0	0.7461	74.9	0.0081		0
341	21	1,6-HEPTADIENE	Ethyl acetate	003070-53-9	C7H12	dry	4.22	3.747	3.877	3.917	4.08	1.241	0.564	0.042	0.113	0.946	0.25	0.31	0	0.15	1.01	0.23	0.23	0	0.14	1.0089	0.4203	17.4	0.0071	low similarity	1	0.746	61.9	0.0037		0	0	0	0	no fragment overlap	0	0.7461	74.9	0.0081		0
47	21	CHLOROFORM	Ethyl acetate	000067-66-3	CHCl3	dry	2.59	2.69	2.86	2.815	3.247	0.81	0.521	0.172	0.005	0.629	0.34	0.48	0.12	0	0.62	0.39	0.45	0	0	0.6167	0.6073	43.5	0.0197		0	0.578	36.6	0.0035		0	0	0	0	no fragment overlap	0	0	0	0	no fragment overlap	0
157	21	TETRACHLOROMETHANE	Ethyl acetate	000056-23-5	CCl4	dry	3.29	3.304	3.718	3.401	3.8	0.926	0.298	0.067	-0.016	0.759	0.42	0.55	0	0	0.74	0.52	0.6	0	0	0.7391	0.4857	24.2	0.0349	low similarity	1	0.6167	41.8	0.0062		0	0	0	0	no fragment overlap	0	0	0	0	no fragment overlap	0
332	21	1-CHLOROPROPANE	Ethyl acetate	000540-54-5	C3H7Cl	dry	2.46	2.788	2.494	2.82	2.639	0.8	0.451	0.051	0.094	0.619	0.13	0.32	0	0.03	0.65	0.2	0.32	0	0	0.6537	0.7377	69.2	0.0066		0	0.7947	71.2	0.0103		0	0	0	0	no fragment overlap	0	0	0	0	no fragment overlap	0
219	21	TERT-BUTYLCHLORIDE	Ethyl acetate	000507-20-0	C4H9Cl	dry	3.41	3.209	2.675	3.32	2.625	0.89	0.45	0.056	0.17	0.745	0.11	0.26	0	0.07	0.79	0.13	0.15	0	0	0.7946	0.5558	33.3	0.0022		0	0.4394	21.7	0.0004	low similarity	1	0	0	0	no fragment overlap	0	0	0	0	no fragment overlap	0
30856	21	ETHYLBROMIDE	Ethyl acetate	000074-96-4	C2H5Br	dry	2.05	2.462	2.077	2.355	2.245	0.817	0.494	0.055	0.103	0.533	0.31	0.4	0	0.03	0.57	0.34	0.39	0	0.09	0.5654	0.8018	81.2	0.019		0	0.9742	99	0.0263		0	0	0	0	no fragment overlap	0	0.8791	91	0.0371		0
410	21	2-BROMO-2-METHYLPROPANE	Ethyl acetate	000507-19-7	C4H9Br	dry	3.57	3.456	2.827	3.568	2.894	1.045	0.548	0.048	0.175	0.783	0.29	0.34	0	0.07	0.85	0.3	0.25	0	0	0.8472	0.5525	32.9	0.018		0	0.6782	51	0.0086		0	0	0	0	no fragment overlap	0	0	0	0	no fragment overlap	0
220	21	1,1,2-TRICHLORO-1,2,2-TRIFLUOROETHANE[R113]	Ethyl acetate	000076-13-1	C2Cl3F3	dry	3.79	3.404	4.228	3.545	4.113	0.51	0.072	0.092	-0.02	0.894	0.2	0.31	0	0.04	0.81	0.11	0.23	0	0	0.8107	0.6785	58.2	0.0924		0	0.4671	24.4	0.0285	low similarity	1	0	0	0	no fragment overlap	0	0	0	0	no fragment overlap	0
1946	21	1,2-DIFLUORO-1,1,2,2-TETRACHLOROETHANE	Ethyl acetate	000076-12-0	C2Cl4F2	dry	4.03	3.696	4.433	3.837	4.395	0.806	0.213	0.086	0.011	0.968	0.42	0.45	0	0.08	0.92	0.38	0.16	0	0	0.9154	0.7581	73.3	0.1883	high leverage	1	0.453	23.2	0.1116	high leverage low similarity	1	0	0	0	no fragment overlap	0	0	0	0	no fragment overlap	0
4	21	ACETONE	Ethyl acetate	000067-64-1	C3H6O	dry	0.03	0.727	-0.03	0.21	-0.266	0.63	0.712	0.046	0.485	0.515	0.22	0.67	0	0.34	0.55	0.12	0.64	0	0.5	0.547	0.5931	40.1	0.0018		0	0.6565	47.5	0.0268		0	0	0	0	no fragment overlap	0	0.334	13	0.0452	low similarity	1
40	21	2-BUTANONE	Ethyl acetate	000078-93-3	C4H8O	dry	0.54	1.295	0.695	0.916	0.454	0.692	0.668	0.033	0.461	0.649	0.21	0.67	0	0.34	0.69	0.12	0.63	0	0.48	0.6879	0.5931	40.1	0.0018		0	0.891	87.7	0.0084		0	0	0	0	no fragment overlap	0	0.4432	25.5	0.0579		0
21	21	ETHYLACETATE	Ethyl acetate	000141-78-6	C4H8O2	dry	1.14	1.41	0.919	1.091	0.832	0.667	0.735	0.033	0.464	0.716	0.07	0.58	0	0.36	0.75	0.07	0.62	0	0.48	0.7466	0.8503	90.3	0.0205		0	0.7051	54.7	0.0219		0	0	0	0	no fragment overlap	0	0.7374	72.8	0.0319		0
3	21	ACETONITRILE	Ethyl acetate	000075-05-8	C2H3N	dry	0.22	0.761	-0.356	0.323	-0.215	0.504	0.837	0.106	0.417	0.391	0.19	0.72	0	0.2	0.4	0.17	0.56	0.05	0.18	0.4042	0.8597	91.7	0.0113		0	0.2974	9.7	0.0109	low similarity	1	0.2134	32.2	0.011		0	0.4544	26.8	0.0194		0
61	21	DIETHYLAMINE	Ethyl acetate	000109-89-7	C4H11N	dry	-0.24	0.997	1.87	0.63	1.069	0.867	0.277	0.165	0.308	0.716	0.15	0.35	0.13	0.48	0.77	0.17	0.32	0.02	0.59	0.772	0.2386	5.8	0.0025	low similarity	1	0.6992	53.5	0.0019		0	0.3635	48.3	0.4003	structural outlier	2	0.3023	10.8	0.0392	low similarity	1
72	21	DIMETHYLFORMAMIDE	Ethyl acetate	000068-12-2	C3H7NO	dry	-1.26	-0.416	-0.593	-1.25	-1.025	0.736	0.856	0.041	0.674	0.608	0.35	1.11	0	0.63	0.65	0.34	1.25	0	0.73	0.6468	0.6971	61.8	0.018		0	0.5355	31.7	0.3346	structural outlier	2	0	0	0	no fragment overlap	0	0.4235	22.9	0.026	low similarity	1
110	21	METHANOL	Ethyl acetate	000067-56-1	CH4O	dry	-1.04	-0.218	-0.782	-0.583	-1.52	0.473	0.549	0.586	0.378	0.295	0.21	0.44	0.31	0.3	0.31	0.19	0.28	0.31	0.2	0.3082	0.0194	1.9	0.0022	out of domain	2	0.2446	7.5	0.0017	low similarity	1	0	0	0.0086	out of domain	2	0	0	0.0014	out of domain	2
11	21	ETHANOL	Ethyl acetate	000064-17-5	C2H6O	dry	-0.65	0.349	-0.248	0.123	-1.054	0.564	0.522	0.562	0.391	0.424	0.21	0.45	0.31	0.31	0.45	0.19	0.37	0.33	0.33	0.4491	0.0194	1.9	0.0022	out of domain	2	0.8374	76.4	0.0078		0	0.296	43.7	0.034		0	0.3233	12.3	0.0151	low similarity	1
95	21	2-PROPANOL	Ethyl acetate	000067-63-0	C3H8O	dry	-0.45	0.79	0.206	0.655	-0.634	0.654	0.524	0.513	0.422	0.554	0.22	0.43	0.31	0.34	0.59	0.19	0.28	0.31	0.42	0.59	0.0194	1.9	0.0022	out of domain	2	0.2446	7.5	0.0017	low similarity	1	0	0	0.0086	out of domain	2	0	0	0.1444	out of domain	2
31007	21	DIMETHYL-SULFOXIDE	Ethyl acetate	000067-68-5	C2H6OS	dry	-2.97	-1.047	-1.889	-2.069	-2.601	0.854	1.063	0.117	0.903	0.591	0.52	1.37	0	0.71	0.61	0.39	0.61	0	0.34	0.6126	0.5556	33.3	0.0537		0	0	0	0.0136	out of domain	2	0	0	0	no fragment overlap	0	0.1712	3.3	0.0064	out of domain	2
31093	21	CARBON-DISULFIDE	Ethyl acetate	000075-15-0	CS2	dry	2.44	2.314	3.081	2.005	3.061	1.117	0.24	0.025	-0.077	0.503	1.07	1	0	0	0.49	0.9	0.49	0	0.35	0.4905	0.59	38.8	0.0228		0	0.5223	30.3	0.022		0	0	0	0	no fragment overlap	0	0.2181	5.9	0.0393	low similarity	1
31	21	BENZENE	Ethyl acetate	000071-43-2	C6H6	dry	2.61	2.632	2.75	2.506	2.981	1.173	0.598	0.059	0.102	0.674	0.56	0.69	0	0.12	0.72	0.58	0.6	0	0.13	0.7164	0.3858	14.7	0.0092	low similarity	1	0.7874	70.4	0.0024		0	0	0	0	no fragment overlap	0	0.6062	49.6	0.0039		0
161	21	TOLUENE	Ethyl acetate	000108-88-3	C7H8	dry	3.04	3.247	3.239	3.244	3.411	1.315	0.606	0.056	0.121	0.802	0.58	0.63	0	0.12	0.86	0.63	0.62	0	0.16	0.8573	0.5953	40.7	0.0035		0	0.8573	81	0.0021		0	0	0	0	no fragment overlap	0	0.7763	79.5	0.0029		0
123	21	NAPHTHALENE	Ethyl acetate	000091-20-3	C10H8	dry	3.97	4	3.849	3.957	4.139	2.055	0.936	0.077	0.202	1.018	1.27	1.02	0	0.17	1.09	1.28	0.93	0	0.18	1.0854	0.4324	18.5	0.0099	low similarity	1	0.7946	71.1	0.0038		0	0	0	0	no fragment overlap	0	0.6351	55.2	0.007		0
1169	21	ACENAPHTHYLENE-1,2-DIHYDRO	Ethyl acetate	000083-32-9	C12H10	dry	4.56	4.938	4.448	5.009	4.611	2.33	0.96	0.055	0.247	1.19	1.53	0.99	0	0.15	1.26	1.58	1.07	0	0.27	1.2586	0.6334	47.9	0.1371	high leverage	1	0.6768	50.5	0.0085		0	0	0	0	no fragment overlap	0	0.7471	75.1	0.0146		0
927	21	PHENANTHRENE	Ethyl acetate	000085-01-8	C14H10	dry	5.32	5.362	4.86	5.401	5.078	3.016	1.258	0.111	0.321	1.357	1.99	1.34	0	0.23	1.45	2.07	1.25	0	0.22	1.4544	0.6251	46.3	0.1686	high leverage	1	0.6533	47.1	0.007		0	0	0	0	no fragment overlap	0	0.6043	49.3	0.011		0
1183	21	FLUORANTHENE	Ethyl acetate	000206-44-0	C16H10	dry	5.84	5.958	5.321	5.917	5.461	3.527	1.389	0.112	0.37	1.495	2.6	1.52	0	0.25	1.58	2.27	1.53	0	0.32	1.5846	0.1058	2.8	0.3054	out of domain structural outlier	2	0.5354	31.6	0.0121		0	0	0	0	no fragment overlap	0	0.4466	25.9	0.0269		0
17	21	ANILINE	Ethyl acetate	000062-53-3	C6H7N	dry	1.19	1.282	1.763	1.004	1.85	1.357	0.985	0.475	0.297	0.762	0.86	1.08	0.23	0.43	0.82	0.94	1.01	0.27	0.35	0.8162	0.6208	45.7	0.011		0	0.6716	49.8	0.0071		0	0	0	0.012	out of domain	2	0.7438	73.9	0.007		0
5931	21	METHYL-P-HYDROXYBENZOATE	Ethyl acetate	000099-76-3	C8H8O3	dry	1.9	0.792	1.614	0.932	1.339	1.483	1.268	0.978	0.511	1.083	0.87	1.24	0.66	0.72	1.13	0.91	1.33	0.7	0.56	1.1313	0.8287	85.8	0.034		0	0.5546	33.6	0.0292		0	0.6017	71.9	0.1114	structural outlier	2	0.772	78.7	0.0107		0
85	21	FURFURAL	Ethyl acetate	000098-01-1	C5H4O2	dry	0.79	0.798	0.381	0.201	0.613	1.039	1.13	0.137	0.529	0.69	0.6	1.06	0	0.44	0.69	0.56	0.95	0	0.44	0.6929	0.4025	15.8	0.0269	low similarity	1	0.6997	54.3	0.0327		0	0	0	0	no fragment overlap	0	0.467	28.6	0.03		0
5954	21	PHENACETIN	Ethyl acetate	000062-44-2	C10H13NO2	dry	1.42	1.455	2.027	1.4	1.573	2.007	1.37	0.497	0.765	1.366	0.96	1.55	0.41	0.87	1.45	0.93	1.4	0.38	0.8	1.4542	0.8758	94.1	0.1723	high leverage	1	0.7026	54.5	0.1019	high leverage	1	0.0686	5.8	0.0165	low similarity	1	0.7315	71.7	0.0291		0
5441	21	MONURON	Ethyl acetate	000150-68-5	C9H11ClN2O	dry	1.95	1.812	2.864	1.725	2.72	2.143	1.361	0.419	0.63	1.382	1.16	1.59	0.37	0.84	1.48	1.29	1.5	0.38	0.84	1.4768	0.7036	62.8	0.0547		0	0.638	45.1	0.0507		0	0.0686	5.8	0.0165	low similarity	1	0.7017	67.8	0.0455		0
5945	21	DIURON	Ethyl acetate	000330-54-1	C9H10Cl2N2O	dry	2.7	2.617	3.487	2.811	3.181	2.342	1.319	0.472	0.62	1.507	1.27	1.66	0.44	0.77	1.6	1.34	1.7	0.38	0.82	1.5992	0.3238	10.6	0.0113	low similarity	1	0.6596	47.9	0.0324		0	0.0686	5.8	0.0165	low similarity	1	0.6999	67.6	0.0456		0
5972	21	DIPHENYL-SULFONE	Ethyl acetate	000127-63-9	C12H10O2S	dry	3.28	2.938	2.896	2.717	2.976	2.327	1.549	0.124	0.769	1.508	1.26	2.01	0	0.74	1.61	1.49	2.02	0	0.77	1.6051	0.4724	23.2	0.0293	low similarity	1	0.4865	26.6	0.0247		0	0	0	0	no fragment overlap	0	0.6377	55.7	0.0197		0
2822	21	HEXACHLOROBENZENE	Ethyl acetate	000118-74-1	C6Cl6	dry	6.1	6.291	5.844	6.889	5.783	2.337	0.714	0.053	0.171	1.409	1.33	1.23	0	0	1.45	1.42	1.08	0	0	1.4508	0.4172	17	0.0278	low similarity	1	0.4378	21.5	0.0112	low similarity	1	0	0	0	no fragment overlap	0	0	0	0	no fragment overlap	0
1642	21	P-HYDROQUINONE	Ethyl acetate	000123-31-9	C6H6O2	dry	0.18	-0.243	0.672	0.034	0.212	1.183	1.211	1.553	0.365	0.801	1.02	1.14	1	0.65	0.83	0.98	1.32	1.06	0.45	0.8338	0.5593	34	0.1052		0	0.5116	29.1	0.1012	high leverage	1	0	0	0.1747	out of domain structural outlier	2	0.6223	53.1	0.0054		0
1051	27	METHANE	Chlorobenzene	000074-82-8	CH4	dry/wet	1.12	1.08	1.321	0.836	1.114	0.516	0.15	0.035	-0.042	0.228	0.11	0.21	0	0.01	0.25	0	0	0	0	0.2495	0	0	0	no fragment overlap	0	0	0	0	no fragment overlap	0	0	0	0	no fragment overlap	0	0	0	0	no fragment overlap	0
316	27	2-METHYLPROPANE	Chlorobenzene	000075-28-5	C4H10	dry/wet	3.35	2.783	3.207	2.585	3.091	0.773	0.127	0.044	-0.043	0.618	0.01	0.17	0	0.06	0.67	0	0	0	0	0.6722	0	0	0	no fragment overlap	0	0	0	0	no fragment overlap	0	0	0	0	no fragment overlap	0	0	0	0	no fragment overlap	0
134	27	PENTANE	Chlorobenzene	000109-66-0	C5H12	dry/wet	4.13	3.536	3.916	3.419	3.819	0.876	0.106	0.049	-0.06	0.747	0	0.19	0	0.04	0.81	0	0	0	0	0.8131	0	0	0	no fragment overlap	0	0	0	0	no fragment overlap	0	0	0	0	no fragment overlap	0	0	0	0	no fragment overlap	0
89	27	HEXANE	Chlorobenzene	000110-54-3	C6H14	dry/wet	4.77	4.169	4.509	4.1	4.426	0.98	0.097	0.055	-0.055	0.875	0	0.19	0	0.04	0.95	0	0	0	0	0.954	0	0	0	no fragment overlap	0	0	0	0	no fragment overlap	0	0	0	0	no fragment overlap	0	0	0	0	no fragment overlap	0
91	27	HEPTANE	Chlorobenzene	000142-82-5	C7H16	dry/wet	5.43	4.803	5.092	4.78	5.037	1.105	0.122	0.055	-0.049	1	0	0.2	0	0.05	1.09	0	0	0	0	1.0949	0	0	0	no fragment overlap	0	0	0	0	no fragment overlap	0	0	0	0	no fragment overlap	0	0	0	0	no fragment overlap	0
128	27	OCTANE	Chlorobenzene	000111-65-9	C8H18	dry/wet	6.1	5.437	5.773	5.462	5.768	1.191	0.126	0.058	-0.057	1.135	0	0.2	0	0.05	1.24	0	0	0	0	1.2358	0	0	0	no fragment overlap	0	0	0	0	no fragment overlap	0	0	0	0	no fragment overlap	0	0	0	0	no fragment overlap	0
398	27	NONANE	Chlorobenzene	000111-84-2	C9H20	dry/wet	6.67	6.066	6.346	6.136	6.361	1.328	0.153	0.058	-0.05	1.258	-0.01	0.2	0	0.05	1.38	0	0	0	0	1.3767	0	0	0	no fragment overlap	0	0	0	0	no fragment overlap	0	0	0	0	no fragment overlap	0	0	0	0	no fragment overlap	0
74	27	2,4-DIMETHYLPENTANE	Chlorobenzene	000108-08-7	C7H16	dry/wet	5.19	4.564	4.729	4.473	4.648	1.061	0.115	0.06	0.017	0.995	0.02	0.16	0	0.1	1.09	0	0	0	0	1.0949	0	0	0	no fragment overlap	0	0	0	0	no fragment overlap	0	0	0	0	no fragment overlap	0	0	0	0	no fragment overlap	0
1283	27	2,5-DIMETHYLHEXANE	Chlorobenzene	000592-13-2	C8H18	dry/wet	5.66	5.197	5.396	5.154	5.369	1.155	0.133	0.062	0.01	1.128	0.02	0.17	0	0.1	1.24	0	0	0	0	1.2358	0	0	0	no fragment overlap	0	0	0	0	no fragment overlap	0	0	0	0	no fragment overlap	0	0	0	0	no fragment overlap	0
401	27	ETHYLCYCLOHEXANE	Chlorobenzene	001678-91-7	C8H16	dry/wet	5.64	4.962	5.074	5.036	5.01	1.189	0.18	0.044	-0.003	1.035	0.22	0.27	0	0.05	1.13	0.26	0.18	0	0	1.1272	0.6786	58.3	0.003		0	0.5193	29.6	0.0021		0	0	0	0	no fragment overlap	0	0	0	0	no fragment overlap	0
1053	27	ETHYLENE	Chlorobenzene	000074-85-1	C2H4	dry/wet	1.39	1.285	1.407	1.003	1.319	0.621	0.325	0.044	0.022	0.329	0.1	0.19	0	0.07	0.35	0.12	0.11	0	0.07	0.3474	0.5931	40.1	0.0018		0	0.3517	14.4	0.0009	low similarity	1	0	0	0	no fragment overlap	0	0.6727	62.8	0.002		0
257	27	1-PENTENE	Chlorobenzene	000109-67-1	C5H10	dry/wet	3.44	3.115	3.255	2.985	3.206	0.95	0.307	0.046	0.036	0.716	0.13	0.24	0	0.09	0.77	0.12	0.11	0	0.07	0.7701	0.5931	40.1	0.0018		0	0.3517	14.4	0.0009	low similarity	1	0	0	0	no fragment overlap	0	0.6727	62.8	0.002		0
1014	27	TETRAFLUOROMETHANE[R14]	Chlorobenzene	000075-73-0	CF4	dry/wet	1.34	1.379	2.539	0.914	2.648	-0.006	-0.061	0.046	-0.133	0.426	-0.47	-0.03	0	0	0.32	-0.49	-0.42	0	0	0.3203	0.6313	47.7	0.2027	high leverage	1	0.0106	0.1	0.2389	out of domain structural outlier	2	0	0	0	no fragment overlap	0	0	0	0	no fragment overlap	0
581	27	METHYLCHLORIDE	Chlorobenzene	000074-87-3	CH3Cl	dry/wet	1.22	1.543	1.131	1.37	1.184	0.573	0.462	0.069	0.079	0.364	0.13	0.31	0	0.03	0.37	0.13	0.15	0	0	0.3719	0.5558	33.3	0.0022		0	0.4394	21.7	0.0004	low similarity	1	0	0	0	no fragment overlap	0	0	0	0	no fragment overlap	0
219	27	TERT-BUTYLCHLORIDE	Chlorobenzene	000507-20-0	C4H9Cl	dry/wet	3.41	3.311	2.63	3.213	2.674	0.89	0.45	0.056	0.17	0.745	0.11	0.26	0	0.07	0.79	0.13	0.15	0	0	0.7946	0.5558	33.3	0.0022		0	0.4394	21.7	0.0004	low similarity	1	0	0	0	no fragment overlap	0	0	0	0	no fragment overlap	0
30856	27	ETHYLBROMIDE	Chlorobenzene	000074-96-4	C2H5Br	dry/wet	2.03	2.439	1.919	2.416	1.949	0.817	0.494	0.055	0.103	0.533	0.31	0.4	0	0.03	0.57	0.34	0.39	0	0.09	0.5654	0.8018	81.2	0.019		0	0.9742	99	0.0263		0	0	0	0	no fragment overlap	0	0.8791	91	0.0371		0
410	27	2-BROMO-2-METHYLPROPANE	Chlorobenzene	000507-19-7	C4H9Br	dry/wet	3.5	3.578	2.815	3.583	2.875	1.045	0.548	0.048	0.175	0.783	0.29	0.34	0	0.07	0.85	0.3	0.25	0	0	0.8472	0.5525	32.9	0.018		0	0.6782	51	0.0086		0	0	0	0	no fragment overlap	0	0	0	0	no fragment overlap	0
580	27	DIMETHYLETHER	Chlorobenzene	000115-10-6	C2H6O	dry/wet	0.2	0.846	0.702	0.445	0.628	0.572	0.432	0.018	0.271	0.428	0.05	0.33	0	0.24	0.45	0	0.28	0	0.24	0.4491	0	0	0	no fragment overlap	0	0.7078	55.3	0.0125		0	0	0	0	no fragment overlap	0	0.2	5	0.014	low similarity	1
75	27	1,4-DIOXANE	Chlorobenzene	000123-91-1	C4H8O2	dry/wet	0.02	0.964	0.171	0.596	0.305	0.729	0.837	0.011	0.592	0.668	0.29	0.58	0	0.44	0.68	0.37	0.53	0	0.68	0.681	0.5033	27	0.0243		0	0.5954	38.4	0.0501		0	0	0	0	no fragment overlap	0	0.1703	3.2	0.0199	out of domain	2
40	27	2-BUTANONE	Chlorobenzene	000078-93-3	C4H8O	dry/wet	0.57	1.372	0.703	1.127	0.791	0.692	0.668	0.033	0.461	0.649	0.21	0.67	0	0.34	0.69	0.12	0.63	0	0.48	0.6879	0.5931	40.1	0.0018		0	0.891	87.7	0.0084		0	0	0	0	no fragment overlap	0	0.4432	25.5	0.0579		0
21	27	ETHYLACETATE	Chlorobenzene	000141-78-6	C4H8O2	dry/wet	1.09	1.525	0.954	1.194	1.158	0.667	0.735	0.033	0.464	0.716	0.07	0.58	0	0.36	0.75	0.07	0.62	0	0.48	0.7466	0.8503	90.3	0.0205		0	0.7051	54.7	0.0219		0	0	0	0	no fragment overlap	0	0.7374	72.8	0.0319		0
3	27	ACETONITRILE	Chlorobenzene	000075-05-8	C2H3N	dry/wet	-0.11	0.672	-0.672	0.489	-0.448	0.504	0.837	0.106	0.417	0.391	0.19	0.72	0	0.2	0.4	0.17	0.56	0.05	0.18	0.4042	0.8597	91.7	0.0113		0	0.2974	9.7	0.0109	low similarity	1	0.2134	32.2	0.011		0	0.4544	26.8	0.0194		0
110	27	METHANOL	Chlorobenzene	000067-56-1	CH4O	dry/wet	-2.07	-1.085	-2.322	-1.671	-2.25	0.473	0.549	0.586	0.378	0.295	0.21	0.44	0.31	0.3	0.31	0.19	0.28	0.31	0.2	0.3082	0.0194	1.9	0.0022	out of domain	2	0.2446	7.5	0.0017	low similarity	1	0	0	0.0086	out of domain	2	0	0	0.0014	out of domain	2
11	27	ETHANOL	Chlorobenzene	000064-17-5	C2H6O	dry/wet	-1.38	-0.451	-1.662	-0.99	-1.597	0.564	0.522	0.562	0.391	0.424	0.21	0.45	0.31	0.31	0.45	0.19	0.37	0.33	0.33	0.4491	0.0194	1.9	0.0022	out of domain	2	0.8374	76.4	0.0078		0	0.296	43.7	0.034		0	0.3233	12.3	0.0151	low similarity	1
140	27	1-PROPANOL	Chlorobenzene	000071-23-8	C3H8O	dry/wet	-0.75	0.182	-0.994	-0.31	-0.892	0.643	0.538	0.528	0.406	0.556	0.21	0.45	0.31	0.31	0.59	0.19	0.37	0.33	0.39	0.59	0.0194	1.9	0.0022	out of domain	2	0.8374	76.4	0.0078		0	0.296	43.7	0.034		0	0.3558	14.6	0.0213	low similarity	1
39	27	1-BUTANOL	Chlorobenzene	000071-36-3	C4H10O	dry/wet	-0.07	0.816	-0.503	0.371	-0.384	0.75	0.524	0.567	0.409	0.682	0.2	0.46	0.31	0.31	0.73	0.19	0.37	0.36	0.47	0.7309	0.0194	1.9	0.0022	out of domain	2	0.8374	76.4	0.0078		0	0.4208	54.5	0.0196		0	0.9246	94.4	0.0188		0
22	27	2-BUTANOL	Chlorobenzene	000078-92-2	C4H10O	dry/wet	-0.27	0.696	-0.091	0.218	0.039	0.743	0.517	0.503	0.365	0.682	0.21	0.44	0.31	0.34	0.73	0.19	0.28	0.31	0.51	0.7309	0.0194	1.9	0.0022	out of domain	2	0.2446	7.5	0.0017	low similarity	1	0	0	0.0086	out of domain	2	0.7584	77.3	0.0354		0
136	27	1-PENTANOL	Chlorobenzene	000071-41-0	C5H12O	dry/wet	0.67	1.449	0.19	1.052	0.36	0.841	0.536	0.566	0.398	0.814	0.2	0.46	0.31	0.32	0.87	0.19	0.47	0.36	0.47	0.8718	0.0194	1.9	0.0022	out of domain	2	0.8971	89.3	0.0182		0	0.4208	54.5	0.0196		0	0.9246	94.4	0.0188		0
120	27	2-METHYL-1-PROPANOL	Chlorobenzene	000078-83-1	C4H10O	dry/wet	-0.18	0.696	-0.24	0.218	-0.099	0.756	0.523	0.552	0.358	0.676	0.21	0.44	0.31	0.34	0.73	0.19	0.37	0.27	0.33	0.7309	0.0194	1.9	0.0022	out of domain	2	0.8374	76.4	0.0078		0	0.6981	79.2	0.0972	high leverage	1	0.3233	12.3	0.0151	low similarity	1
266	27	3-METHYL-1-BUTANOL<ISOPENTANOL>	Chlorobenzene	000123-51-3	C5H12O	dry/wet	0.52	1.329	-0.011	0.898	0.143	0.834	0.545	0.565	0.435	0.809	0.21	0.44	0.31	0.34	0.87	0.19	0.37	0.33	0.39	0.8718	0.0194	1.9	0.0022	out of domain	2	0.8374	76.4	0.0078		0	0.296	43.7	0.034		0	0.3558	14.6	0.0213	low similarity	1
43	27	2-CHLOROETHANOL	Chlorobenzene	000107-07-3	C2H5ClO	dry/wet	-1.21	-0.136	-1.469	-0.578	-0.971	0.667	0.897	0.719	0.341	0.557	0.33	0.59	0.38	0.31	0.57	0.39	0.68	0.33	0.39	0.5715	0.6874	60.1	0.0087		0	0.6271	43.3	0.0178		0	0.296	43.7	0.034		0	0.3558	14.6	0.0213	low similarity	1
1732	27	1,3-DICHLORO-2-PROPANOL	Chlorobenzene	000096-23-1	C3H6Cl2O	dry/wet	-0.43	0.798	-1.557	0.483	-0.69	0.889	1.333	0.866	0.486	0.818	0.46	0.72	0.42	0.34	0.83	0.59	0.91	0.31	0.59	0.8348	0.653	52	0.0285		0	0.6283	43.4	0.043		0	0	0	0.0086	out of domain	2	0.8535	88.7	0.0234		0
31	27	BENZENE	Chlorobenzene	000071-43-2	C6H6	dry/wet	2.61	2.679	2.643	2.799	2.651	1.173	0.598	0.059	0.102	0.674	0.56	0.69	0	0.12	0.72	0.58	0.6	0	0.13	0.7164	0.3858	14.7	0.0092	low similarity	1	0.7874	70.4	0.0024		0	0	0	0	no fragment overlap	0	0.6062	49.6	0.0039		0
161	27	TOLUENE	Chlorobenzene	000108-88-3	C7H8	dry/wet	3.17	3.365	3.204	3.518	3.207	1.315	0.606	0.056	0.121	0.802	0.58	0.63	0	0.12	0.86	0.63	0.62	0	0.16	0.8573	0.5953	40.7	0.0035		0	0.8573	81	0.0021		0	0	0	0	no fragment overlap	0	0.7763	79.5	0.0029		0
25	27	ETHYLBENZENE	Chlorobenzene	000100-41-4	C8H10	dry/wet	3.7	3.998	3.779	4.198	3.799	1.428	0.614	0.054	0.132	0.928	0.58	0.64	0	0.12	1	0.63	0.48	0	0.17	0.9982	0.5953	40.7	0.0035		0	0.942	96.3	0.011		0	0	0	0	no fragment overlap	0	0.8392	87.5	0.0042		0
471	27	BIPHENYL	Chlorobenzene	000092-52-4	C12H10	dry/wet	4.84	5.1	4.535	5.747	4.566	2.339	1.096	0.088	0.267	1.232	1.39	1.16	0	0.21	1.32	1.32	1.07	0	0.27	1.3242	0.5679	35.5	0.0134		0	0.8607	81.2	0.006		0	0	0	0	no fragment overlap	0	0.6182	52.1	0.0119		0
123	27	NAPHTHALENE	Chlorobenzene	000091-20-3	C10H8	dry/wet	4.04	4.215	3.863	4.733	3.818	2.055	0.936	0.077	0.202	1.018	1.27	1.02	0	0.17	1.09	1.28	0.93	0	0.18	1.0854	0.4324	18.5	0.0099	low similarity	1	0.7946	71.1	0.0038		0	0	0	0	no fragment overlap	0	0.6351	55.2	0.007		0
5945	27	DIURON	Chlorobenzene	000330-54-1	C9H10Cl2N2O	dry/wet	1.96	2.05	2.807	2.111	3.076	2.342	1.319	0.472	0.62	1.507	1.27	1.66	0.44	0.77	1.6	1.34	1.7	0.38	0.82	1.5992	0.3238	10.6	0.0113	low similarity	1	0.6596	47.9	0.0324		0	0.0686	5.8	0.0165	low similarity	1	0.6999	67.6	0.0456		0
12	27	DIETHYLETHER	Chlorobenzene	000060-29-7	C4H10O	dry/wet	1.76	2.113	2.025	1.806	1.964	0.764	0.367	0.029	0.262	0.69	0.04	0.34	0	0.25	0.73	0	0.26	0	0.51	0.7309	0	0	0	no fragment overlap	0	0.7658	66.6	0.0255		0	0	0	0	no fragment overlap	0	0	0	0.3439	out of domain structural outlier	2
4	27	ACETONE	Chlorobenzene	000067-64-1	C3H6O	dry/wet	0.01	0.739	-0.116	0.446	-0.055	0.63	0.712	0.046	0.485	0.515	0.22	0.67	0	0.34	0.55	0.12	0.64	0	0.5	0.547	0.5931	40.1	0.0018		0	0.6565	47.5	0.0268		0	0	0	0	no fragment overlap	0	0.334	13	0.0452	low similarity	1
40	27	2-BUTANONE	Chlorobenzene	000078-93-3	C4H8O	dry/wet	0.6	1.372	0.703	1.127	0.791	0.692	0.668	0.033	0.461	0.649	0.21	0.67	0	0.34	0.69	0.12	0.63	0	0.48	0.6879	0.5931	40.1	0.0018		0	0.891	87.7	0.0084		0	0	0	0	no fragment overlap	0	0.4432	25.5	0.0579		0
137	27	2-PENTANONE	Chlorobenzene	000107-87-9	C5H10O	dry/wet	1.29	2.005	1.279	1.807	1.386	0.813	0.68	0.037	0.462	0.769	0.21	0.68	0	0.34	0.83	0.12	0.63	0	0.5	0.8288	0.5931	40.1	0.0018		0	0.891	87.7	0.0084		0	0	0	0	no fragment overlap	0	0.9604	99	0.0156		0
616	27	METHYLBUTYLKETONE	Chlorobenzene	000591-78-6	C6H12O	dry/wet	1.87	2.639	1.924	2.488	2.065	0.903	0.681	0.035	0.467	0.905	0.21	0.68	0	0.35	0.97	0.12	0.63	0	0.5	0.9697	0.5931	40.1	0.0018		0	0.891	87.7	0.0084		0	0	0	0	no fragment overlap	0	0.9604	99	0.0156		0
92	27	2-HEPTANONE	Chlorobenzene	000110-43-0	C7H14O	dry/wet	2.51	3.272	2.539	3.169	2.711	1.022	0.696	0.039	0.463	1.029	0.21	0.69	0	0.35	1.11	0.08	0.63	0	0.5	1.1106	0.3755	14	0.0344	low similarity	1	0.891	87.7	0.0084		0	0	0	0	no fragment overlap	0	0.9604	99	0.0156		0
662	27	3,3-DIMETHYL-2-BUTANONE	Chlorobenzene	000075-97-8	C6H12O	dry/wet	1.73	2.508	1.634	2.29	1.711	0.88	0.639	0.039	0.514	0.89	0.2	0.62	0	0.38	0.97	0.12	0.47	0	0.39	0.9697	0.5931	40.1	0.0018		0	0.7539	63.8	0.0068		0	0	0	0	no fragment overlap	0	0.5731	45.1	0.0115		0
816	27	2,4-PENTANEDIONE	Chlorobenzene	000123-54-6	C5H8O2	dry/wet	0.76	0.475	-0.153	0.196	0.262	0.723	1.139	0.059	0.73	0.806	0.43	1.17	0	0.65	0.84	0.46	0.4	0	0.78	0.8445	0.3531	12.4	0.4063	structural outlier	2	0.4036	18.5	0.3418	structural outlier	2	0	0	0	no fragment overlap	0	0.5309	38.2	0.0459		0
82	27	METHYLACETATE	Chlorobenzene	000079-20-9	C3H6O2	dry/wet	0.5	0.896	0.351	0.519	0.559	0.57	0.757	0.044	0.446	0.585	0.07	0.57	0	0.36	0.61	0.11	0.61	0	0.4	0.6057	0.631	47.6	0.0298		0	0.6969	53.3	0.0096		0	0	0	0	no fragment overlap	0	0.5298	38.1	0.0225		0
21	27	ETHYLACETATE	Chlorobenzene	000141-78-6	C4H8O2	dry/wet	1.12	1.525	0.954	1.194	1.158	0.667	0.735	0.033	0.464	0.716	0.07	0.58	0	0.36	0.75	0.07	0.62	0	0.48	0.7466	0.8503	90.3	0.0205		0	0.7051	54.7	0.0219		0	0	0	0	no fragment overlap	0	0.7374	72.8	0.0319		0
80	27	BUTYLACETATE	Chlorobenzene	000123-86-4	C6H12O2	dry/wet	2.34	2.787	2.353	2.55	2.61	0.85	0.703	0.033	0.437	0.973	0.06	0.59	0	0.37	1.03	0.07	0.57	0	0.46	1.0284	0.8503	90.3	0.0205		0	0.9448	96.5	0.0095		0	0	0	0	no fragment overlap	0	0.8152	85.1	0.0324		0
400	27	METHYLPROPIONATE	Chlorobenzene	000554-12-1	C4H8O2	dry/wet	1.19	1.525	0.912	1.194	1.118	0.653	0.734	0.033	0.469	0.713	0.07	0.58	0	0.36	0.75	0.09	0.6	0	0.44	0.7466	0.4929	25.2	0.0079		0	0.9361	95.5	0.0047		0	0	0	0	no fragment overlap	0	0.4969	33.4	0.0519		0
400	27	METHYLPROPIONATE	Chlorobenzene	000554-12-1	C4H8O2	dry/wet	2.39	1.525	0.912	1.194	1.118	0.653	0.734	0.033	0.469	0.713	0.07	0.58	0	0.36	0.75	0.09	0.6	0	0.44	0.7466	0.4929	25.2	0.0079		0	0.9361	95.5	0.0047		0	0	0	0	no fragment overlap	0	0.4969	33.4	0.0519		0
178	27	METHYLAMINE	Chlorobenzene	000074-89-5	CH5N	dry/wet	-1.76	-1.851	-1.351	-2.648	-1.604	0.571	0.359	0.279	0.435	0.322	0.21	0.49	0.21	0.57	0.35	0.26	0.32	0.27	0.26	0.3493	0.558	33.7	0.0112		0	0.6992	53.5	0.0019		0	0	0	0.012	out of domain	2	0.1311	1.3	0.0062	out of domain	2
320	27	ETHYLAMINE	Chlorobenzene	000075-04-7	C2H7N	dry/wet	-0.55	-1.218	-0.828	-1.967	-1.067	0.674	0.366	0.276	0.46	0.451	0.21	0.49	0.21	0.57	0.49	0.26	0.32	0.17	0.56	0.4902	0.558	33.7	0.0112		0	0.6992	53.5	0.0019		0	0.8347	87.5	0.0271		0	0.7619	77.9	0.0238		0
377	27	PROPYLAMINE	Chlorobenzene	000107-10-8	C3H9N	dry/wet	-0.59	-0.584	-0.05	-1.287	-0.259	0.752	0.333	0.276	0.433	0.582	0.2	0.5	0.21	0.58	0.63	0.26	0.32	0.17	0.56	0.6311	0.558	33.7	0.0112		0	0.6992	53.5	0.0019		0	0.8347	87.5	0.0271		0	0.7619	77.9	0.0238		0
240	27	BUTYLAMINE	Chlorobenzene	000109-73-9	C4H11N	dry/wet	-0.05	0.049	0.555	-0.606	0.377	0.85	0.338	0.278	0.437	0.711	0.2	0.5	0.21	0.58	0.77	0.2	0.32	0.17	0.56	0.772	0.7765	76.4	0.0252		0	0.6992	53.5	0.0019		0	0.8347	87.5	0.0271		0	0.7619	77.9	0.0238		0
179	27	DIMETHYLAMINE	Chlorobenzene	000124-40-3	C2H7N	dry/wet	-1.13	-0.43	0.075	-1.098	-0.152	0.668	0.311	0.179	0.343	0.455	0.16	0.34	0.13	0.47	0.49	0.17	0.32	0.21	0.53	0.4902	0.2386	5.8	0.0025	low similarity	1	0.6992	53.5	0.0019		0	0.0009	0.3	0.3082	out of domain structural outlier	2	0.2127	5.5	0.1791	high leverage low similarity	1
533	27	TRIMETHYLAMINE	Chlorobenzene	000075-50-3	C3H9N	dry/wet	-0.3	0.389	1.451	-0.212	1.232	0.798	0.283	0.066	0.264	0.581	0.17	0.36	0	0.53	0.63	0.17	0.32	0	0.62	0.6311	0.2386	5.8	0.0025	low similarity	1	0.6992	53.5	0.0019		0	0	0	0	no fragment overlap	0	0.3054	11	0.2454	high leverage low similarity	1
110	27	METHANOL	Chlorobenzene	000067-56-1	CH4O	dry/wet	-1.96	-1.085	-2.322	-1.671	-2.25	0.473	0.549	0.586	0.378	0.295	0.21	0.44	0.31	0.3	0.31	0.19	0.28	0.31	0.2	0.3082	0.0194	1.9	0.0022	out of domain	2	0.2446	7.5	0.0017	low similarity	1	0	0	0.0086	out of domain	2	0	0	0.0014	out of domain	2
11	27	ETHANOL	Chlorobenzene	000064-17-5	C2H6O	dry/wet	-1.7	-0.451	-1.662	-0.99	-1.597	0.564	0.522	0.562	0.391	0.424	0.21	0.45	0.31	0.31	0.45	0.19	0.37	0.33	0.33	0.4491	0.0194	1.9	0.0022	out of domain	2	0.8374	76.4	0.0078		0	0.296	43.7	0.034		0	0.3233	12.3	0.0151	low similarity	1
140	27	1-PROPANOL	Chlorobenzene	000071-23-8	C3H8O	dry/wet	-0.74	0.182	-0.994	-0.31	-0.892	0.643	0.538	0.528	0.406	0.556	0.21	0.45	0.31	0.31	0.59	0.19	0.37	0.33	0.39	0.59	0.0194	1.9	0.0022	out of domain	2	0.8374	76.4	0.0078		0	0.296	43.7	0.034		0	0.3558	14.6	0.0213	low similarity	1
39	27	1-BUTANOL	Chlorobenzene	000071-36-3	C4H10O	dry/wet	-0.3	0.816	-0.503	0.371	-0.384	0.75	0.524	0.567	0.409	0.682	0.2	0.46	0.31	0.31	0.73	0.19	0.37	0.36	0.47	0.7309	0.0194	1.9	0.0022	out of domain	2	0.8374	76.4	0.0078		0	0.4208	54.5	0.0196		0	0.9246	94.4	0.0188		0
136	27	1-PENTANOL	Chlorobenzene	000071-41-0	C5H12O	dry/wet	0.57	1.449	0.19	1.052	0.36	0.841	0.536	0.566	0.398	0.814	0.2	0.46	0.31	0.32	0.87	0.19	0.47	0.36	0.47	0.8718	0.0194	1.9	0.0022	out of domain	2	0.8971	89.3	0.0182		0	0.4208	54.5	0.0196		0	0.9246	94.4	0.0188		0
296	27	1-HEXANOL	Chlorobenzene	000111-27-3	C6H14O	dry/wet	1.19	2.083	0.813	1.733	1.006	0.948	0.56	0.535	0.418	0.942	0.2	0.46	0.31	0.32	1.01	0.19	0.47	0.36	0.47	1.0127	0.0194	1.9	0.0022	out of domain	2	0.8971	89.3	0.0182		0	0.4208	54.5	0.0196		0	0.9246	94.4	0.0188		0
343	27	1-HEPTANOL	Chlorobenzene	000111-70-6	C7H16O	dry/wet	1.86	2.717	1.44	2.413	1.678	1.055	0.56	0.569	0.398	1.072	0.2	0.47	0.31	0.32	1.15	0.19	0.47	0.36	0.47	1.1536	0.0194	1.9	0.0022	out of domain	2	0.8971	89.3	0.0182		0	0.4208	54.5	0.0196		0	0.9246	94.4	0.0188		0
273	27	2-ETHOXYETHANOL	Chlorobenzene	000110-80-5	C4H10O2	dry/wet	-1.3	-0.104	-1.173	-0.764	-0.831	0.738	0.834	0.586	0.575	0.755	0.28	0.55	0.23	0.62	0.79	0.19	0.58	0.25	0.81	0.7896	0.0194	1.9	0.0022	out of domain	2	0.858	81	0.0146		0	0.7034	80.7	0.0559	high leverage	1	0.5753	45.5	0.0992		0
38	27	2-BUTOXY-ETHANOL	Chlorobenzene	000111-76-2	C6H14O2	dry/wet	0	1.159	0.078	0.592	0.472	0.953	0.846	0.585	0.576	1.01	0.28	0.56	0.23	0.63	1.07	0.19	0.54	0.25	0.76	1.0714	0.0194	1.9	0.0022	out of domain	2	0.8864	85.1	0.0172		0	0.7034	80.7	0.0559	high leverage	1	0.5129	35.8	0.0305		0
147	27	METHYLSALICYLATE	Chlorobenzene	000119-36-8	C8H8O3	dry/wet	2.86	2.739	2.597	2.834	2.847	1.521	1.058	0.1	0.444	1.064	0.8	1.06	0.13	0.4	1.13	0.82	0.83	0.09	0.41	1.1313	0.6438	50.2	0.0174		0	0.6618	48.3	0.1471	high leverage	1	0.2584	38.4	0.1715	structural outlier	2	0.4447	25.7	0.1387	high leverage	1
3342	27	2,2-BIS(4-HYDROXYPHENYL)PROPANE	Chlorobenzene	000080-05-7	C15H16O2	dry/wet	0.92	1.605	0.189	1.466	1.145	2.499	1.726	1.558	0.628	1.73	1.59	1.46	1	0.79	1.86	1.59	1.78	1.06	0.69	1.8643	0.4967	25.8	0.139	high leverage	1	0.4919	27	0.1012	high leverage	1	0	0	0.1747	out of domain structural outlier	2	0	0	0.0803	out of domain	2
17	27	ANILINE	Chlorobenzene	000062-53-3	C6H7N	dry/wet	0.9	0.851	0.677	0.778	0.952	1.357	0.985	0.475	0.297	0.762	0.86	1.08	0.23	0.43	0.82	0.94	1.01	0.27	0.35	0.8162	0.6208	45.7	0.011		0	0.6716	49.8	0.0071		0	0	0	0.012	out of domain	2	0.7438	73.9	0.007		0
1168	27	P-METHYLANILINE	Chlorobenzene	000106-49-0	C7H9N	dry/wet	1.46	1.535	1.324	1.496	1.569	1.5	0.979	0.44	0.323	0.892	0.88	1.02	0.23	0.43	0.96	0.96	1.03	0.27	0.38	0.9571	0.6645	54.2	0.0091		0	0.6939	53	0.0074		0	0	0	0.012	out of domain	2	0.6953	66.5	0.0078		0
857	27	2-NITROANILINE	Chlorobenzene	000088-74-4	C6H6N2O2	dry/wet	1.88	1.491	0.216	1.672	0.452	1.601	1.082	0.602	0.485	0.932	1.16	1.44	0.18	0.48	0.99	1.17	1.49	0.13	0.47	0.9904	0.8543	91	0.0157		0	0.5068	28.8	0.0097		0	0	0	0.1135	out of domain structural outlier	2	0.6193	52.5	0.0109		0
859	27	4-NITROANILINE	Chlorobenzene	000100-01-6	C6H6N2O2	dry/wet	1.57	0.825	-0.948	0.972	-0.49	1.614	1.318	0.843	0.559	0.947	1.13	1.65	0.28	0.53	0.99	1.2	1.62	0.27	0.45	0.9904	0.734	68.5	0.0114		0	0.4809	26.1	0.0786		0	0	0	0.012	out of domain	2	0.6066	49.7	0.0106		0
271	27	BENZIDINE	Chlorobenzene	000092-87-5	C12H12N2	dry/wet	1.48	1.445	0.858	1.708	1.377	2.94	1.798	1.111	0.501	1.409	1.99	1.94	0.45	0.84	1.52	2.01	1.89	0.55	0.71	1.5238	0.4999	26.4	0.0363		0	0	0	0.0269	out of domain	2	0	0	0.048	out of domain	2	0.2201	6.2	0.0285	low similarity	1
130	27	2-METHYLPHENOL(O-CRESOL)	Chlorobenzene	000095-48-7	C7H8O	dry/wet	1.07	0.738	0.604	0.502	1.069	1.333	0.944	0.79	0.198	0.86	0.81	0.84	0.5	0.39	0.92	0.76	0.82	0.41	0.34	0.916	0.6328	47.8	0.0089		0	0.7442	61.7	0.003		0	0	0	0.0044	out of domain	2	0.6375	55.6	0.0031		0
132	27	4-METHYLPHENOL(P-CRESOL)	Chlorobenzene	000106-44-5	C7H8O	dry/wet	0.8	0.738	0.519	0.502	0.982	1.333	0.96	0.783	0.222	0.863	0.81	0.84	0.5	0.39	0.92	0.82	0.97	0.53	0.32	0.916	0.7117	63.9	0.0265		0	0.8096	73.2	0.0263		0	0.1056	14.3	0.0437	low similarity	1	0.7551	76.6	0.0034		0
277	27	2,3-DIMETHYLPHENOL	Chlorobenzene	000526-75-0	C8H10O	dry/wet	1.43	1.428	1.671	1.227	1.996	1.458	0.958	0.47	0.314	0.98	0.83	0.79	0.5	0.39	1.06	0.83	0.83	0.41	0.38	1.0569	0.8556	91	0.0047		0	0.9174	92.6	0.0057		0	0	0	0.0044	out of domain	2	0.8127	84.8	0.0076		0
278	27	2,4-DIMETHYLPHENOL	Chlorobenzene	000105-67-9	C8H10O	dry/wet	1.25	1.428	1.812	1.227	2.15	1.471	0.961	0.468	0.293	0.987	0.83	0.79	0.5	0.39	1.06	0.83	0.83	0.41	0.36	1.0569	0.9135	96.9	0.0039		0	0.9174	92.6	0.0057		0	0	0	0.0044	out of domain	2	0.8084	84.6	0.0079		0
1206	27	2,5-DIMETHYLPHENOL	Chlorobenzene	000095-87-4	C8H10O	dry/wet	1.43	1.428	1.214	1.227	1.658	1.489	0.95	0.769	0.22	0.988	0.83	0.79	0.5	0.39	1.06	0.83	0.83	0.41	0.36	1.0569	0.9135	96.9	0.0039		0	0.9174	92.6	0.0057		0	0	0	0.0044	out of domain	2	0.8084	84.6	0.0079		0
279	27	2,6-DIMETHYLPHENOL	Chlorobenzene	000576-26-1	C8H10O	dry/wet	1.74	2.023	1.798	1.917	2.07	1.475	0.881	0.489	0.286	0.982	0.83	0.79	0.31	0.39	1.06	0.83	0.83	0.3	0.38	1.0569	0.8556	91	0.0047		0	0.9174	92.6	0.0057		0	0	0	0.1002	out of domain	2	0.8127	84.8	0.0076		0
1207	27	3,4-DIMETHYLPHENOL	Chlorobenzene	000095-65-8	C8H10O	dry/wet	1.22	1.428	0.994	1.227	1.448	1.456	0.969	0.772	0.261	0.989	0.83	0.79	0.5	0.39	1.06	0.83	0.83	0.41	0.24	1.0569	0.9135	96.9	0.0039		0	0.9174	92.6	0.0057		0	0	0	0.0044	out of domain	2	0.509	35.2	0.2153	high leverage	1
280	27	3,5-DIMETHYLPHENOL	Chlorobenzene	000108-68-9	C8H10O	dry/wet	1.26	1.428	1.076	1.227	1.531	1.478	0.965	0.782	0.242	0.992	0.83	0.79	0.5	0.39	1.06	0.83	0.83	0.57	0.34	1.0569	0.7846	78.5	0.0069		0	0.9174	92.6	0.0057		0	0	0	1	out of domain structural outlier	2	0.7723	78.8	0.0101		0
1564	27	2-ETHYLPHENOL	Chlorobenzene	000090-00-6	C8H10O	dry/wet	1.41	1.372	1.369	1.183	1.851	1.437	0.917	0.789	0.174	0.989	0.81	0.85	0.5	0.39	1.06	0.76	0.74	0.41	0.28	1.0569	0.6328	47.8	0.0089		0	0.6749	50.4	0.0024		0	0	0	0.0044	out of domain	2	0.6404	56.1	0.0413		0
1563	27	4-ETHYLPHENOL	Chlorobenzene	000123-07-9	C8H10O	dry/wet	1.3	1.372	1.107	1.183	1.586	1.433	0.957	0.78	0.233	0.991	0.81	0.85	0.5	0.39	1.06	0.78	0.89	0.53	0.33	1.0569	0.9246	97.9	0.0332		0	0.9412	96.3	0.0253		0	0.1056	14.3	0.0437	low similarity	1	0.8409	87.7	0.0049		0
810	27	O-CHLOROPHENOL	Chlorobenzene	000095-57-8	C6H5ClO	dry/wet	1.45	1.645	2.084	1.598	2.357	1.361	0.828	0.402	0.16	0.859	0.84	0.84	0.33	0.3	0.9	0.87	0.89	0.41	0.27	0.8975	0.7172	65.2	0.0102		0	0.6552	47.3	0.0025		0	0	0	0.0044	out of domain	2	0.5931	47.9	0.0018		0
811	27	M-CHLOROPHENOL	Chlorobenzene	000108-43-0	C6H5ClO	dry/wet	1	0.303	0.441	0.107	0.99	1.371	0.972	0.937	0.139	0.866	0.91	0.97	0.69	0.33	0.9	0.88	1.08	0.68	0.25	0.8975	0.7602	73.8	0.0104		0	0.8541	79.6	0.0485		0	0.2965	43.9	0.1134	structural outlier	2	0.71	68.9	0.0027		0
812	27	P-CHLOROPHENOL	Chlorobenzene	000106-48-9	C6H5ClO	dry/wet	1.04	0.137	0.329	-0.076	0.896	1.361	1.006	0.93	0.163	0.866	0.94	1.01	0.67	0.38	0.9	0.92	0.92	0.53	0.25	0.8975	0.7256	66.6	0.0271		0	0.7361	60.3	0.0452		0	0.1056	14.3	0.0437	low similarity	1	0.71	68.9	0.0027		0
809	27	GUAIACOL	Chlorobenzene	000090-05-1	C7H8O2	dry/wet	1.19	1.264	1.625	1.106	2.002	1.346	1.017	0.373	0.316	0.921	0.77	0.96	0.27	0.47	0.97	0.88	0.88	0.41	0.49	0.9747	0.652	51.8	0.0852		0	0.5815	36.9	0.0059		0	0	0	0.0044	out of domain	2	0.8699	90.1	0.0053		0
3215	27	VANILLIN	Chlorobenzene	000121-33-5	C8H8O3	dry/wet	0.82	-0.054	0.424	-0.298	0.872	1.576	1.349	0.474	0.641	1.08	1.02	1.46	0.44	0.76	1.13	0.92	1.39	0.16	0.72	1.1313	0.5188	28.7	0.5658	structural outlier	2	0.4722	25.1	0.0626		0	0	0	0.6033	out of domain structural outlier	2	0.6511	57.9	0.0082		0
50026	27	1-Naphthol	Chlorobenzene	000090-15-3	C10H8O1	dry/wet	1.74	1.587	1.362	1.716	1.697	2.066	1.131	0.863	0.243	1.081	1.5	1.23	0.5	0.45	1.14	1.46	1.31	0.41	0.35	1.1441	0.7822	78.1	0.0086		0	0.5044	28.4	0.1128	high leverage	1	0	0	0.0044	out of domain	2	0.5005	33.9	0.0048		0
3342	27	2,2-BIS(4-HYDROXYPHENYL)PROPANE	Chlorobenzene	000080-05-7	C15H16O2	dry/wet	0.92	1.605	0.189	1.466	1.145	2.499	1.726	1.558	0.628	1.73	1.59	1.46	1	0.79	1.86	1.59	1.78	1.06	0.69	1.8643	0.4967	25.8	0.139	high leverage	1	0.4919	27	0.1012	high leverage	1	0	0	0.1747	out of domain structural outlier	2	0	0	0.0803	out of domain	2
85	27	FURFURAL	Chlorobenzene	000098-01-1	C5H4O2	dry/wet	0.79	0.874	0.133	0.779	0.433	1.039	1.13	0.137	0.529	0.69	0.6	1.06	0	0.44	0.69	0.56	0.95	0	0.44	0.6929	0.4025	15.8	0.0269	low similarity	1	0.6997	54.3	0.0327		0	0	0	0	no fragment overlap	0	0.467	28.6	0.03		0
608	27	3-NITROPHENOL	Chlorobenzene	000554-84-7	C6H5NO3	dry/wet	0.48	-0.403	-0.862	-0.521	-0.117	1.309	1.252	1.042	0.362	0.92	1.05	1.47	0.69	0.49	0.95	1.01	1.48	0.68	0.39	0.9493	0.791	79.8	0.0125		0	0.5722	35.8	0.0515		0	0.2965	43.9	0.1134	structural outlier	2	0.6693	61.1	0.0063		0
4152	27	8-HYDROXYQUINOLINE	Chlorobenzene	000148-24-3	C9H7NO	dry/wet	2.39	1.368	2.592	1.449	2.709	1.965	1.13	0.219	0.37	1.041	1.55	1.36	0.07	0.73	1.1	1.4	1.36	0.41	0.6	1.103	0.9045	96.5	0.0439		0	0.4288	20.6	0.1154	high leverage low similarity	1	0	0	0.0044	out of domain	2	0.7496	75.8	0.0529		0
1051	30867	METHANE	Bromobenzene	000074-82-8	CH4	dry/wet	1.04	0.985	1.238	0.729	0.878	0.516	0.15	0.035	-0.042	0.228	0.11	0.21	0	0.01	0.25	0	0	0	0	0.2495	0	0	0	no fragment overlap	0	0	0	0	no fragment overlap	0	0	0	0	no fragment overlap	0	0	0	0	no fragment overlap	0
128	30867	OCTANE	Bromobenzene	000111-65-9	C8H18	dry/wet	5.85	5.172	5.57	4.87	5.134	1.191	0.126	0.058	-0.057	1.135	0	0.2	0	0.05	1.24	0	0	0	0	1.2358	0	0	0	no fragment overlap	0	0	0	0	no fragment overlap	0	0	0	0	no fragment overlap	0	0	0	0	no fragment overlap	0
1053	30867	ETHYLENE	Bromobenzene	000074-85-1	C2H4	dry/wet	1.32	1.178	1.338	0.811	1.093	0.621	0.325	0.044	0.022	0.329	0.1	0.19	0	0.07	0.35	0.12	0.11	0	0.07	0.3474	0.5931	40.1	0.0018		0	0.3517	14.4	0.0009	low similarity	1	0	0	0	no fragment overlap	0	0.6727	62.8	0.002		0
1014	30867	TETRAFLUOROMETHANE[R14]	Bromobenzene	000075-73-0	CF4	dry/wet	1.14	1.214	2.36	0.573	1.72	-0.006	-0.061	0.046	-0.133	0.426	-0.47	-0.03	0	0	0.32	-0.49	-0.42	0	0	0.3203	0.6313	47.7	0.2027	high leverage	1	0.0106	0.1	0.2389	out of domain structural outlier	2	0	0	0	no fragment overlap	0	0	0	0	no fragment overlap	0
581	30867	METHYLCHLORIDE	Bromobenzene	000074-87-3	CH3Cl	dry/wet	1.19	1.439	1.076	1.291	0.913	0.573	0.462	0.069	0.079	0.364	0.13	0.31	0	0.03	0.37	0.13	0.15	0	0	0.3719	0.5558	33.3	0.0022		0	0.4394	21.7	0.0004	low similarity	1	0	0	0	no fragment overlap	0	0	0	0	no fragment overlap	0
219	30867	TERT-BUTYLCHLORIDE	Bromobenzene	000507-20-0	C4H9Cl	dry/wet	3.32	3.136	2.539	2.871	2.391	0.89	0.45	0.056	0.17	0.745	0.11	0.26	0	0.07	0.79	0.13	0.15	0	0	0.7946	0.5558	33.3	0.0022		0	0.4394	21.7	0.0004	low similarity	1	0	0	0	no fragment overlap	0	0	0	0	no fragment overlap	0
410	30867	2-BROMO-2-METHYLPROPANE	Bromobenzene	000507-19-7	C4H9Br	dry/wet	3.47	3.412	2.737	3.287	2.656	1.045	0.548	0.048	0.175	0.783	0.29	0.34	0	0.07	0.85	0.3	0.25	0	0	0.8472	0.5525	32.9	0.018		0	0.6782	51	0.0086		0	0	0	0	no fragment overlap	0	0	0	0	no fragment overlap	0
580	30867	DIMETHYLETHER	Bromobenzene	000115-10-6	C2H6O	dry/wet	0.14	0.757	0.659	0.272	0.547	0.572	0.432	0.018	0.271	0.428	0.05	0.33	0	0.24	0.45	0	0.28	0	0.24	0.4491	0	0	0	no fragment overlap	0	0.7078	55.3	0.0125		0	0	0	0	no fragment overlap	0	0.2	5	0.014	low similarity	1
75	30867	1,4-DIOXANE	Bromobenzene	000123-91-1	C4H8O2	dry/wet	0.13	0.901	0.182	0.468	0.393	0.729	0.837	0.011	0.592	0.668	0.29	0.58	0	0.44	0.68	0.37	0.53	0	0.68	0.681	0.5033	27	0.0243		0	0.5954	38.4	0.0501		0	0	0	0	no fragment overlap	0	0.1703	3.2	0.0199	out of domain	2
40	30867	2-BUTANONE	Bromobenzene	000078-93-3	C4H8O	dry/wet	0.5	1.299	0.68	1.119	0.752	0.692	0.668	0.033	0.461	0.649	0.21	0.67	0	0.34	0.69	0.12	0.63	0	0.48	0.6879	0.5931	40.1	0.0018		0	0.891	87.7	0.0084		0	0	0	0	no fragment overlap	0	0.4432	25.5	0.0579		0
11	30867	ETHANOL	Bromobenzene	000064-17-5	C2H6O	dry/wet	-1.43	-0.508	-1.674	-1.076	-1.517	0.564	0.522	0.562	0.391	0.424	0.21	0.45	0.31	0.31	0.45	0.19	0.37	0.33	0.33	0.4491	0.0194	1.9	0.0022	out of domain	2	0.8374	76.4	0.0078		0	0.296	43.7	0.034		0	0.3233	12.3	0.0151	low similarity	1
140	30867	1-PROPANOL	Bromobenzene	000071-23-8	C3H8O	dry/wet	-0.88	0.102	-1.02	-0.458	-0.872	0.643	0.538	0.528	0.406	0.556	0.21	0.45	0.31	0.31	0.59	0.19	0.37	0.33	0.39	0.59	0.0194	1.9	0.0022	out of domain	2	0.8374	76.4	0.0078		0	0.296	43.7	0.034		0	0.3558	14.6	0.0213	low similarity	1
39	30867	1-BUTANOL	Bromobenzene	000071-36-3	C4H10O	dry/wet	-0.13	0.713	-0.545	0.159	-0.396	0.75	0.524	0.567	0.409	0.682	0.2	0.46	0.31	0.31	0.73	0.19	0.37	0.36	0.47	0.7309	0.0194	1.9	0.0022	out of domain	2	0.8374	76.4	0.0078		0	0.4208	54.5	0.0196		0	0.9246	94.4	0.0188		0
22	30867	2-BUTANOL	Bromobenzene	000078-92-2	C4H10O	dry/wet	-0.35	0.596	-0.141	-0.019	-0.039	0.743	0.517	0.503	0.365	0.682	0.21	0.44	0.31	0.34	0.73	0.19	0.28	0.31	0.51	0.7309	0.0194	1.9	0.0022	out of domain	2	0.2446	7.5	0.0017	low similarity	1	0	0	0.0086	out of domain	2	0.7584	77.3	0.0354		0
136	30867	1-PENTANOL	Bromobenzene	000071-41-0	C5H12O	dry/wet	0.62	1.323	0.13	0.776	0.268	0.841	0.536	0.566	0.398	0.814	0.2	0.46	0.31	0.32	0.87	0.19	0.47	0.36	0.47	0.8718	0.0194	1.9	0.0022	out of domain	2	0.8971	89.3	0.0182		0	0.4208	54.5	0.0196		0	0.9246	94.4	0.0188		0
296	30867	1-HEXANOL	Bromobenzene	000111-27-3	C6H14O	dry/wet	1.15	1.934	0.743	1.394	0.885	0.948	0.56	0.535	0.418	0.942	0.2	0.46	0.31	0.32	1.01	0.19	0.47	0.36	0.47	1.0127	0.0194	1.9	0.0022	out of domain	2	0.8971	89.3	0.0182		0	0.4208	54.5	0.0196		0	0.9246	94.4	0.0188		0
120	30867	2-METHYL-1-PROPANOL	Bromobenzene	000078-83-1	C4H10O	dry/wet	-0.2	0.596	-0.288	-0.019	-0.167	0.756	0.523	0.552	0.358	0.676	0.21	0.44	0.31	0.34	0.73	0.19	0.37	0.27	0.33	0.7309	0.0194	1.9	0.0022	out of domain	2	0.8374	76.4	0.0078		0	0.6981	79.2	0.0972	high leverage	1	0.3233	12.3	0.0151	low similarity	1
266	30867	3-METHYL-1-BUTANOL<ISOPENTANOL>	Bromobenzene	000123-51-3	C5H12O	dry/wet	0.62	1.206	-0.064	0.599	0.095	0.834	0.545	0.565	0.435	0.809	0.21	0.44	0.31	0.34	0.87	0.19	0.37	0.33	0.39	0.8718	0.0194	1.9	0.0022	out of domain	2	0.8374	76.4	0.0078		0	0.296	43.7	0.034		0	0.3558	14.6	0.0213	low similarity	1
252	30867	CYCLOHEXANOL	Bromobenzene	000108-93-0	C6H12O	dry/wet	0.73	1.497	0.232	1.078	0.418	0.96	0.584	0.498	0.463	0.848	0.42	0.53	0.31	0.32	0.9	0.45	0.46	0.31	0.59	0.9041	0.8414	88.6	0.0046		0	0.4289	20.6	0.0035	low similarity	1	0	0	0.0086	out of domain	2	0.8535	88.7	0.0234		0
43	30867	2-CHLOROETHANOL	Bromobenzene	000107-07-3	C2H5ClO	dry/wet	-1.08	-0.193	-1.467	-0.593	-1.12	0.667	0.897	0.719	0.341	0.557	0.33	0.59	0.38	0.31	0.57	0.39	0.68	0.33	0.39	0.5715	0.6874	60.1	0.0087		0	0.6271	43.3	0.0178		0	0.296	43.7	0.034		0	0.3558	14.6	0.0213	low similarity	1
161	30867	TOLUENE	Bromobenzene	000108-88-3	C7H8	dry/wet	3.14	3.248	3.135	3.463	3.104	1.315	0.606	0.056	0.121	0.802	0.58	0.63	0	0.12	0.86	0.63	0.62	0	0.16	0.8573	0.5953	40.7	0.0035		0	0.8573	81	0.0021		0	0	0	0	no fragment overlap	0	0.7763	79.5	0.0029		0
12	30867	DIETHYLETHER	Bromobenzene	000060-29-7	C4H10O	dry/wet	1.51	1.977	1.941	1.506	1.779	0.764	0.367	0.029	0.262	0.69	0.04	0.34	0	0.25	0.73	0	0.26	0	0.51	0.7309	0	0	0	no fragment overlap	0	0.7658	66.6	0.0255		0	0	0	0	no fragment overlap	0	0	0	0.3439	out of domain structural outlier	2
816	30867	2,4-PENTANEDIONE	Bromobenzene	000123-54-6	C5H8O2	dry/wet	0.79	0.479	-0.117	0.457	0.288	0.723	1.139	0.059	0.73	0.806	0.43	1.17	0	0.65	0.84	0.46	0.4	0	0.78	0.8445	0.3531	12.4	0.4063	structural outlier	2	0.4036	18.5	0.3418	structural outlier	2	0	0	0	no fragment overlap	0	0.5309	38.2	0.0459		0
82	30867	METHYLACETATE	Bromobenzene	000079-20-9	C3H6O2	dry/wet	0.4	0.822	0.338	0.456	0.439	0.57	0.757	0.044	0.446	0.585	0.07	0.57	0	0.36	0.61	0.11	0.61	0	0.4	0.6057	0.631	47.6	0.0298		0	0.6969	53.3	0.0096		0	0	0	0	no fragment overlap	0	0.5298	38.1	0.0225		0
21	30867	ETHYLACETATE	Bromobenzene	000141-78-6	C4H8O2	dry/wet	1.08	1.428	0.925	1.067	1.011	0.667	0.735	0.033	0.464	0.716	0.07	0.58	0	0.36	0.75	0.07	0.62	0	0.48	0.7466	0.8503	90.3	0.0205		0	0.7051	54.7	0.0219		0	0	0	0	no fragment overlap	0	0.7374	72.8	0.0319		0
80	30867	BUTYLACETATE	Bromobenzene	000123-86-4	C6H12O2	dry/wet	2.22	2.645	2.284	2.297	2.322	0.85	0.703	0.033	0.437	0.973	0.06	0.59	0	0.37	1.03	0.07	0.57	0	0.46	1.0284	0.8503	90.3	0.0205		0	0.9448	96.5	0.0095		0	0	0	0	no fragment overlap	0	0.8152	85.1	0.0324		0
320	30867	ETHYLAMINE	Bromobenzene	000075-04-7	C2H7N	dry/wet	-1.3	-1.24	-0.846	-2.123	-0.803	0.674	0.366	0.276	0.46	0.451	0.21	0.49	0.21	0.57	0.49	0.26	0.32	0.17	0.56	0.4902	0.558	33.7	0.0112		0	0.6992	53.5	0.0019		0	0.8347	87.5	0.0271		0	0.7619	77.9	0.0238		0
377	30867	PROPYLAMINE	Bromobenzene	000107-10-8	C3H9N	dry/wet	-0.6	-0.63	-0.093	-1.506	-0.091	0.752	0.333	0.276	0.433	0.582	0.2	0.5	0.21	0.58	0.63	0.26	0.32	0.17	0.56	0.6311	0.558	33.7	0.0112		0	0.6992	53.5	0.0019		0	0.8347	87.5	0.0271		0	0.7619	77.9	0.0238		0
240	30867	BUTYLAMINE	Bromobenzene	000109-73-9	C4H11N	dry/wet	-0.07	-0.019	0.496	-0.888	0.495	0.85	0.338	0.278	0.437	0.711	0.2	0.5	0.21	0.58	0.77	0.2	0.32	0.17	0.56	0.772	0.7765	76.4	0.0252		0	0.6992	53.5	0.0019		0	0.8347	87.5	0.0271		0	0.7619	77.9	0.0238		0
110	30867	METHANOL	Bromobenzene	000067-56-1	CH4O	dry/wet	-2.05	-1.118	-2.315	-1.692	-2.135	0.473	0.549	0.586	0.378	0.295	0.21	0.44	0.31	0.3	0.31	0.19	0.28	0.31	0.2	0.3082	0.0194	1.9	0.0022	out of domain	2	0.2446	7.5	0.0017	low similarity	1	0	0	0.0086	out of domain	2	0	0	0.0014	out of domain	2
11	30867	ETHANOL	Bromobenzene	000064-17-5	C2H6O	dry/wet	-1.7	-0.508	-1.674	-1.076	-1.517	0.564	0.522	0.562	0.391	0.424	0.21	0.45	0.31	0.31	0.45	0.19	0.37	0.33	0.33	0.4491	0.0194	1.9	0.0022	out of domain	2	0.8374	76.4	0.0078		0	0.296	43.7	0.034		0	0.3233	12.3	0.0151	low similarity	1
140	30867	1-PROPANOL	Bromobenzene	000071-23-8	C3H8O	dry/wet	-0.8	0.102	-1.02	-0.458	-0.872	0.643	0.538	0.528	0.406	0.556	0.21	0.45	0.31	0.31	0.59	0.19	0.37	0.33	0.39	0.59	0.0194	1.9	0.0022	out of domain	2	0.8374	76.4	0.0078		0	0.296	43.7	0.034		0	0.3558	14.6	0.0213	low similarity	1
39	30867	1-BUTANOL	Bromobenzene	000071-36-3	C4H10O	dry/wet	-0.47	0.713	-0.545	0.159	-0.396	0.75	0.524	0.567	0.409	0.682	0.2	0.46	0.31	0.31	0.73	0.19	0.37	0.36	0.47	0.7309	0.0194	1.9	0.0022	out of domain	2	0.8374	76.4	0.0078		0	0.4208	54.5	0.0196		0	0.9246	94.4	0.0188		0
136	30867	1-PENTANOL	Bromobenzene	000071-41-0	C5H12O	dry/wet	0.43	1.323	0.13	0.776	0.268	0.841	0.536	0.566	0.398	0.814	0.2	0.46	0.31	0.32	0.87	0.19	0.47	0.36	0.47	0.8718	0.0194	1.9	0.0022	out of domain	2	0.8971	89.3	0.0182		0	0.4208	54.5	0.0196		0	0.9246	94.4	0.0188		0
296	30867	1-HEXANOL	Bromobenzene	000111-27-3	C6H14O	dry/wet	1.14	1.934	0.743	1.394	0.885	0.948	0.56	0.535	0.418	0.942	0.2	0.46	0.31	0.32	1.01	0.19	0.47	0.36	0.47	1.0127	0.0194	1.9	0.0022	out of domain	2	0.8971	89.3	0.0182		0	0.4208	54.5	0.0196		0	0.9246	94.4	0.0188		0
343	30867	1-HEPTANOL	Bromobenzene	000111-70-6	C7H16O	dry/wet	1.79	2.544	1.35	2.011	1.486	1.055	0.56	0.569	0.398	1.072	0.2	0.47	0.31	0.32	1.15	0.19	0.47	0.36	0.47	1.1536	0.0194	1.9	0.0022	out of domain	2	0.8971	89.3	0.0182		0	0.4208	54.5	0.0196		0	0.9246	94.4	0.0188		0
273	30867	2-ETHOXYETHANOL	Bromobenzene	000110-80-5	C4H10O2	dry/wet	-1.3	-0.16	-1.174	-1.028	-0.811	0.738	0.834	0.586	0.575	0.755	0.28	0.55	0.23	0.62	0.79	0.19	0.58	0.25	0.81	0.7896	0.0194	1.9	0.0022	out of domain	2	0.858	81	0.0146		0	0.7034	80.7	0.0559	high leverage	1	0.5753	45.5	0.0992		0
38	30867	2-BUTOXY-ETHANOL	Bromobenzene	000111-76-2	C6H14O2	dry/wet	-0.07	1.056	0.047	0.202	0.402	0.953	0.846	0.585	0.576	1.01	0.28	0.56	0.23	0.63	1.07	0.19	0.54	0.25	0.76	1.0714	0.0194	1.9	0.0022	out of domain	2	0.8864	85.1	0.0172		0	0.7034	80.7	0.0559	high leverage	1	0.5129	35.8	0.0305		0
17	30867	ANILINE	Bromobenzene	000062-53-3	C6H7N	dry/wet	0.86	0.846	0.683	1.039	1.061	1.357	0.985	0.475	0.297	0.762	0.86	1.08	0.23	0.43	0.82	0.94	1.01	0.27	0.35	0.8162	0.6208	45.7	0.011		0	0.6716	49.8	0.0071		0	0	0	0.012	out of domain	2	0.7438	73.9	0.007		0
1168	30867	P-METHYLANILINE	Bromobenzene	000106-49-0	C7H9N	dry/wet	1.5	1.503	1.318	1.638	1.695	1.5	0.979	0.44	0.323	0.892	0.88	1.02	0.23	0.43	0.96	0.96	1.03	0.27	0.38	0.9571	0.6645	54.2	0.0091		0	0.6939	53	0.0074		0	0	0	0.012	out of domain	2	0.6953	66.5	0.0078		0
857	30867	2-NITROANILINE	Bromobenzene	000088-74-4	C6H6N2O2	dry/wet	1.86	1.516	0.244	2.154	0.809	1.601	1.082	0.602	0.485	0.932	1.16	1.44	0.18	0.48	0.99	1.17	1.49	0.13	0.47	0.9904	0.8543	91	0.0157		0	0.5068	28.8	0.0097		0	0	0	0.1135	out of domain structural outlier	2	0.6193	52.5	0.0109		0
859	30867	4-NITROANILINE	Bromobenzene	000100-01-6	C6H6N2O2	dry/wet	1.51	0.875	-0.886	1.633	-0.1	1.614	1.318	0.843	0.559	0.947	1.13	1.65	0.28	0.53	0.99	1.2	1.62	0.27	0.45	0.9904	0.734	68.5	0.0114		0	0.4809	26.1	0.0786		0	0	0	0.012	out of domain	2	0.6066	49.7	0.0106		0
130	30867	2-METHYLPHENOL(O-CRESOL)	Bromobenzene	000095-48-7	C7H8O	dry/wet	1.02	0.687	0.577	0.52	0.96	1.333	0.944	0.79	0.198	0.86	0.81	0.84	0.5	0.39	0.92	0.76	0.82	0.41	0.34	0.916	0.6328	47.8	0.0089		0	0.7442	61.7	0.003		0	0	0	0.0044	out of domain	2	0.6375	55.6	0.0031		0
132	30867	4-METHYLPHENOL(P-CRESOL)	Bromobenzene	000106-44-5	C7H8O	dry/wet	0.72	0.687	0.496	0.52	0.896	1.333	0.96	0.783	0.222	0.863	0.81	0.84	0.5	0.39	0.92	0.82	0.97	0.53	0.32	0.916	0.7117	63.9	0.0265		0	0.8096	73.2	0.0263		0	0.1056	14.3	0.0437	low similarity	1	0.7551	76.6	0.0034		0
278	30867	2,4-DIMETHYLPHENOL	Bromobenzene	000105-67-9	C8H10O	dry/wet	1.16	1.349	1.783	1.125	2.121	1.471	0.961	0.468	0.293	0.987	0.83	0.79	0.5	0.39	1.06	0.83	0.83	0.41	0.36	1.0569	0.9135	96.9	0.0039		0	0.9174	92.6	0.0057		0	0	0	0.0044	out of domain	2	0.8084	84.6	0.0079		0
1206	30867	2,5-DIMETHYLPHENOL	Bromobenzene	000095-87-4	C8H10O	dry/wet	1.33	1.349	1.177	1.125	1.57	1.489	0.95	0.769	0.22	0.988	0.83	0.79	0.5	0.39	1.06	0.83	0.83	0.41	0.36	1.0569	0.9135	96.9	0.0039		0	0.9174	92.6	0.0057		0	0	0	0.0044	out of domain	2	0.8084	84.6	0.0079		0
1207	30867	3,4-DIMETHYLPHENOL	Bromobenzene	000095-65-8	C8H10O	dry/wet	1.12	1.349	0.963	1.125	1.379	1.456	0.969	0.772	0.261	0.989	0.83	0.79	0.5	0.39	1.06	0.83	0.83	0.41	0.24	1.0569	0.9135	96.9	0.0039		0	0.9174	92.6	0.0057		0	0	0	0.0044	out of domain	2	0.509	35.2	0.2153	high leverage	1
280	30867	3,5-DIMETHYLPHENOL	Bromobenzene	000108-68-9	C8H10O	dry/wet	1.17	1.349	1.043	1.125	1.454	1.478	0.965	0.782	0.242	0.992	0.83	0.79	0.5	0.39	1.06	0.83	0.83	0.57	0.34	1.0569	0.7846	78.5	0.0069		0	0.9174	92.6	0.0057		0	0	0	1	out of domain structural outlier	2	0.7723	78.8	0.0101		0
1563	30867	4-ETHYLPHENOL	Bromobenzene	000123-07-9	C8H10O	dry/wet	1.24	1.298	1.069	1.137	1.464	1.433	0.957	0.78	0.233	0.991	0.81	0.85	0.5	0.39	1.06	0.78	0.89	0.53	0.33	1.0569	0.9246	97.9	0.0332		0	0.9412	96.3	0.0253		0	0.1056	14.3	0.0437	low similarity	1	0.8409	87.7	0.0049		0
810	30867	O-CHLOROPHENOL	Bromobenzene	000095-57-8	C6H5ClO	dry/wet	1.35	1.584	2.038	1.646	2.234	1.361	0.828	0.402	0.16	0.859	0.84	0.84	0.33	0.3	0.9	0.87	0.89	0.41	0.27	0.8975	0.7172	65.2	0.0102		0	0.6552	47.3	0.0025		0	0	0	0.0044	out of domain	2	0.5931	47.9	0.0018		0
811	30867	M-CHLOROPHENOL	Bromobenzene	000108-43-0	C6H5ClO	dry/wet	0.93	0.267	0.41	0.269	0.829	1.371	0.972	0.937	0.139	0.866	0.91	0.97	0.69	0.33	0.9	0.88	1.08	0.68	0.25	0.8975	0.7602	73.8	0.0104		0	0.8541	79.6	0.0485		0	0.2965	43.9	0.1134	structural outlier	2	0.71	68.9	0.0027		0
812	30867	P-CHLOROPHENOL	Bromobenzene	000106-48-9	C6H5ClO	dry/wet	0.96	0.112	0.304	0.11	0.747	1.361	1.006	0.93	0.163	0.866	0.94	1.01	0.67	0.38	0.9	0.92	0.92	0.53	0.25	0.8975	0.7256	66.6	0.0271		0	0.7361	60.3	0.0452		0	0.1056	14.3	0.0437	low similarity	1	0.71	68.9	0.0027		0
809	30867	GUAIACOL	Bromobenzene	000090-05-1	C7H8O2	dry/wet	1.39	1.222	1.608	1.175	1.944	1.346	1.017	0.373	0.316	0.921	0.77	0.96	0.27	0.47	0.97	0.88	0.88	0.41	0.49	0.9747	0.652	51.8	0.0852		0	0.5815	36.9	0.0059		0	0	0	0.0044	out of domain	2	0.8699	90.1	0.0053		0
608	30867	3-NITROPHENOL	Bromobenzene	000554-84-7	C6H5NO3	dry/wet	0.4	-0.369	-0.845	0.02	-0.177	1.309	1.252	1.042	0.362	0.92	1.05	1.47	0.69	0.49	0.95	1.01	1.48	0.68	0.39	0.9493	0.791	79.8	0.0125		0	0.5722	35.8	0.0515		0	0.2965	43.9	0.1134	structural outlier	2	0.6693	61.1	0.0063		0
147	30867	METHYLSALICYLATE	Bromobenzene	000119-36-8	C8H8O3	dry/wet	2.8	2.671	2.586	2.938	2.922	1.521	1.058	0.1	0.444	1.064	0.8	1.06	0.13	0.4	1.13	0.82	0.83	0.09	0.41	1.1313	0.6438	50.2	0.0174		0	0.6618	48.3	0.1471	high leverage	1	0.2584	38.4	0.1715	structural outlier	2	0.4447	25.7	0.1387	high leverage	1
3215	30867	VANILLIN	Bromobenzene	000121-33-5	C8H8O3	dry/wet	0.81	-0.018	0.473	0.042	1.164	1.576	1.349	0.474	0.641	1.08	1.02	1.46	0.44	0.76	1.13	0.92	1.39	0.16	0.72	1.1313	0.5188	28.7	0.5658	structural outlier	2	0.4722	25.1	0.0626		0	0	0	0.6033	out of domain structural outlier	2	0.6511	57.9	0.0082		0
50026	30867	1-Naphthol	Bromobenzene	000090-15-3	C10H8O1	dry/wet	1.8	1.581	1.363	1.939	1.97	2.066	1.131	0.863	0.243	1.081	1.5	1.23	0.5	0.45	1.14	1.46	1.31	0.41	0.35	1.1441	0.7822	78.1	0.0086		0	0.5044	28.4	0.1128	high leverage	1	0	0	0.0044	out of domain	2	0.5005	33.9	0.0048		0
3342	30867	2,2-BIS(4-HYDROXYPHENYL)PROPANE	Bromobenzene	000080-05-7	C15H16O2	dry/wet	0.92	1.559	0.223	1.452	1.457	2.499	1.726	1.558	0.628	1.73	1.59	1.46	1	0.79	1.86	1.59	1.78	1.06	0.69	1.8643	0.4967	25.8	0.139	high leverage	1	0.4919	27	0.1012	high leverage	1	0	0	0.1747	out of domain structural outlier	2	0	0	0.0803	out of domain	2
85	30867	FURFURAL	Bromobenzene	000098-01-1	C5H4O2	dry/wet	0.77	0.873	0.178	1.079	0.589	1.039	1.13	0.137	0.529	0.69	0.6	1.06	0	0.44	0.69	0.56	0.95	0	0.44	0.6929	0.4025	15.8	0.0269	low similarity	1	0.6997	54.3	0.0327		0	0	0	0	no fragment overlap	0	0.467	28.6	0.03		0
1051	516	METHANE	Hexadecane	000074-82-8	CH4	dry/wet	1.14	0.854	1.278	0.803	1.042	0.516	0.15	0.035	-0.042	0.228	0.11	0.21	0	0.01	0.25	0	0	0	0	0.2495	0	0	0	no fragment overlap	0	0	0	0	no fragment overlap	0	0	0	0	no fragment overlap	0	0	0	0	no fragment overlap	0
41	516	BUTANE	Hexadecane	000106-97-8	C4H10	dry/wet	3.13	2.597	3.303	2.563	3.173	0.779	0.118	0.043	-0.063	0.617	0	0.18	0	0.04	0.67	0	0	0	0	0.6722	0	0	0	no fragment overlap	0	0	0	0	no fragment overlap	0	0	0	0	no fragment overlap	0	0	0	0	no fragment overlap	0
316	516	2-METHYLPROPANE	Hexadecane	000075-28-5	C4H10	dry/wet	3.11	2.493	3.188	2.456	3.041	0.773	0.127	0.044	-0.043	0.618	0.01	0.17	0	0.06	0.67	0	0	0	0	0.6722	0	0	0	no fragment overlap	0	0	0	0	no fragment overlap	0	0	0	0	no fragment overlap	0	0	0	0	no fragment overlap	0
134	516	PENTANE	Hexadecane	000109-66-0	C5H12	dry/wet	3.87	3.199	3.928	3.192	3.816	0.876	0.106	0.049	-0.06	0.747	0	0.19	0	0.04	0.81	0	0	0	0	0.8131	0	0	0	no fragment overlap	0	0	0	0	no fragment overlap	0	0	0	0	no fragment overlap	0	0	0	0	no fragment overlap	0
94	516	2-METHYLBUTANE	Hexadecane	000078-78-4	C5H12	dry/wet	3.76	3.096	3.709	3.085	3.571	0.868	0.125	0.049	-0.028	0.741	0.01	0.17	0	0.07	0.81	0	0	0	0	0.8131	0	0	0	no fragment overlap	0	0	0	0	no fragment overlap	0	0	0	0	no fragment overlap	0	0	0	0	no fragment overlap	0
468	516	NEOPENTANE	Hexadecane	000463-82-1	C5H12	dry/wet	3.66	3.127	3.521	3.123	3.334	0.874	0.129	0.052	0.008	0.741	-0.01	0.12	0	0.07	0.81	0	0	0	0	0.8131	0	0	0	no fragment overlap	0	0	0	0	no fragment overlap	0	0	0	0	no fragment overlap	0	0	0	0	no fragment overlap	0
112	516	3-METHYLPENTANE	Hexadecane	000096-14-0	C6H14	dry/wet	4.42	3.698	4.265	3.714	4.129	0.955	0.111	0.057	-0.014	0.87	0.01	0.18	0	0.07	0.95	0	0	0	0	0.954	0	0	0	no fragment overlap	0	0	0	0	no fragment overlap	0	0	0	0	no fragment overlap	0	0	0	0	no fragment overlap	0
370	516	2,2-DIMETHYLBUTANE	Hexadecane	000075-83-2	C6H14	dry/wet	4.19	3.728	4.001	3.752	3.81	0.961	0.123	0.058	0.03	0.863	-0.02	0.12	0	0.08	0.95	0	0	0	0	0.954	0	0	0	no fragment overlap	0	0	0	0	no fragment overlap	0	0	0	0	no fragment overlap	0	0	0	0	no fragment overlap	0
367	516	2,3-DIMETHYLBUTANE	Hexadecane	000079-29-8	C6H14	dry/wet	4.22	3.598	4.079	3.611	3.919	0.945	0.126	0.056	0.014	0.865	0.02	0.16	0	0.1	0.95	0	0	0	0	0.954	0	0	0	no fragment overlap	0	0	0	0	no fragment overlap	0	0	0	0	no fragment overlap	0	0	0	0	no fragment overlap	0
91	516	HEPTANE	Hexadecane	000142-82-5	C7H16	dry/wet	5.14	4.403	5.101	4.448	5.052	1.105	0.122	0.055	-0.049	1	0	0.2	0	0.05	1.09	0	0	0	0	1.0949	0	0	0	no fragment overlap	0	0	0	0	no fragment overlap	0	0	0	0	no fragment overlap	0	0	0	0	no fragment overlap	0
760	516	2-METHYLHEXANE	Hexadecane	000591-76-4	C7H16	dry/wet	5.15	4.299	4.917	4.341	4.822	1.075	0.116	0.059	-0.018	0.998	0.01	0.18	0	0.07	1.09	0	0	0	0	1.0949	0	0	0	no fragment overlap	0	0	0	0	no fragment overlap	0	0	0	0	no fragment overlap	0	0	0	0	no fragment overlap	0
464	516	3-METHYLHEXANE	Hexadecane	000589-34-4	C7H16	dry/wet	5.03	4.299	4.884	4.341	4.796	1.06	0.123	0.058	-0.015	0.998	0.01	0.18	0	0.07	1.09	0	0	0	0	1.0949	0	0	0	no fragment overlap	0	0	0	0	no fragment overlap	0	0	0	0	no fragment overlap	0	0	0	0	no fragment overlap	0
1090	516	2,2-DIMETHYLPENTANE	Hexadecane	000590-35-2	C7H16	dry/wet	4.91	4.331	4.612	4.381	4.443	1.061	0.117	0.063	0.034	0.992	-0.02	0.13	0	0.08	1.09	0	0	0	0	1.0949	0	0	0	no fragment overlap	0	0	0	0	no fragment overlap	0	0	0	0	no fragment overlap	0	0	0	0	no fragment overlap	0
74	516	2,4-DIMETHYLPENTANE	Hexadecane	000108-08-7	C7H16	dry/wet	4.89	4.196	4.722	4.235	4.576	1.061	0.115	0.06	0.017	0.995	0.02	0.16	0	0.1	1.09	0	0	0	0	1.0949	0	0	0	no fragment overlap	0	0	0	0	no fragment overlap	0	0	0	0	no fragment overlap	0	0	0	0	no fragment overlap	0
1242	516	3,3-DIMETHYLPENTANE	Hexadecane	000562-49-2	C7H16	dry/wet	4.83	4.331	4.465	4.381	4.291	1.036	0.134	0.061	0.052	0.987	-0.02	0.13	0	0.08	1.09	0	0	0	0	1.0949	0	0	0	no fragment overlap	0	0	0	0	no fragment overlap	0	0	0	0	no fragment overlap	0	0	0	0	no fragment overlap	0
1693	516	CYCLOPROPANE	Hexadecane	000075-19-4	C3H6	dry/wet	1.86	1.634	1.748	1.674	1.652	0.657	0.3	0.037	0.018	0.435	0.22	0.27	0	0.01	0.42	0.17	0	0	0	0.4227	0.6481	51.2	0.0383		0	0	0	0	no fragment overlap	0	0	0	0	no fragment overlap	0	0	0	0	no fragment overlap	0
55	516	METHYLCYCLOPENTANE	Hexadecane	000096-37-7	C6H12	dry/wet	3.99	3.332	3.998	3.448	3.895	0.988	0.156	0.043	-0.033	0.789	0.22	0.26	0	0.05	0.85	0.27	0.28	0	0	0.8454	0.7041	62.9	0.0774		0	0.5755	36.4	0.0059		0	0	0	0	no fragment overlap	0	0	0	0	no fragment overlap	0
53	516	METHYLCYCLOHEXANE	Hexadecane	000108-87-2	C7H14	dry/wet	4.49	3.933	4.465	4.075	4.359	1.109	0.163	0.043	-0.01	0.904	0.22	0.27	0	0.05	0.99	0.26	0.18	0	0	0.9863	0.6786	58.3	0.003		0	0.5193	29.6	0.0021		0	0	0	0	no fragment overlap	0	0	0	0	no fragment overlap	0
1053	516	ETHYLENE	Hexadecane	000074-85-1	C2H4	dry/wet	1.23	1.052	1.169	0.987	1.063	0.621	0.325	0.044	0.022	0.329	0.1	0.19	0	0.07	0.35	0.12	0.11	0	0.07	0.3474	0.5931	40.1	0.0018		0	0.3517	14.4	0.0009	low similarity	1	0	0	0	no fragment overlap	0	0.6727	62.8	0.002		0
1055	516	PROPYLENE	Hexadecane	000115-07-1	C3H6	dry/wet	1.92	1.547	1.787	1.499	1.702	0.74	0.33	0.039	0.029	0.456	0.13	0.24	0	0.08	0.49	0.12	0.11	0	0.07	0.4883	0.5931	40.1	0.0018		0	0.3517	14.4	0.0009	low similarity	1	0	0	0	no fragment overlap	0	0.6727	62.8	0.002		0
257	516	1-PENTENE	Hexadecane	000109-67-1	C5H10	dry/wet	3.28	2.751	3.058	2.755	3.004	0.95	0.307	0.046	0.036	0.716	0.13	0.24	0	0.09	0.77	0.12	0.11	0	0.07	0.7701	0.5931	40.1	0.0018		0	0.3517	14.4	0.0009	low similarity	1	0	0	0	no fragment overlap	0	0.6727	62.8	0.002		0
356	516	3-METHYL-1-BUTENE	Hexadecane	000563-45-1	C5H10	dry/wet	3.25	2.647	2.893	2.648	2.809	0.928	0.311	0.045	0.06	0.709	0.13	0.23	0	0.12	0.77	0.12	0.11	0	0.07	0.7701	0.5931	40.1	0.0018		0	0.3517	14.4	0.0009	low similarity	1	0	0	0	no fragment overlap	0	0.6727	62.8	0.002		0
263	516	2-METHYL-2-BUTENE	Hexadecane	000513-35-9	C5H10	dry/wet	3.22	2.646	2.961	2.647	2.886	0.993	0.312	0.049	0.046	0.703	0.14	0.23	0	0.12	0.77	0.17	0.11	0	0.07	0.7701	0.6056	43.2	0.0078		0	0.3517	14.4	0.0009	low similarity	1	0	0	0	no fragment overlap	0	0.6727	62.8	0.002		0
100	516	1-HEXENE	Hexadecane	000592-41-6	C6H12	dry/wet	3.73	3.352	3.621	3.382	3.586	1.074	0.311	0.05	0.045	0.839	0.12	0.25	0	0.09	0.91	0.12	0.11	0	0.07	0.911	0.5931	40.1	0.0018		0	0.3517	14.4	0.0009	low similarity	1	0	0	0	no fragment overlap	0	0.6727	62.8	0.002		0
600	516	1-HEPTENE	Hexadecane	000592-76-7	C7H14	dry/wet	4.28	3.955	4.259	4.011	4.271	1.181	0.321	0.052	0.044	0.971	0.12	0.25	0	0.1	1.05	0.12	0.11	0	0.07	1.0519	0.5931	40.1	0.0018		0	0.3517	14.4	0.0009	low similarity	1	0	0	0	no fragment overlap	0	0.6727	62.8	0.002		0
129	516	1-OCTENE	Hexadecane	000111-66-0	C8H16	dry/wet	4.98	4.558	4.881	4.642	4.941	1.291	0.334	0.054	0.043	1.1	0.12	0.26	0	0.1	1.19	0.12	0.11	0	0.07	1.1928	0.5931	40.1	0.0018		0	0.3517	14.4	0.0009	low similarity	1	0	0	0	no fragment overlap	0	0.6727	62.8	0.002		0
364	516	1,3-BUTADIENE	Hexadecane	000106-99-0	C4H6	dry/wet	1.99	1.7	1.823	1.689	1.845	1.041	0.495	0.064	0.079	0.554	0.25	0.3	0	0.14	0.59	0.23	0.23	0	0.14	0.5862	0.4203	17.4	0.0071	low similarity	1	0.746	61.9	0.0037		0	0	0	0	no fragment overlap	0	0.7461	74.9	0.0081		0
98	516	2-METHYL-1,3-BUTADIENE	Hexadecane	000078-79-5	C5H8	dry/wet	2.6	2.301	2.337	2.324	2.331	1.114	0.473	0.062	0.105	0.678	0.23	0.24	0	0.16	0.73	0.36	0.23	0	0.14	0.7271	0.4882	24.5	0.3453	structural outlier	2	0.746	61.9	0.0037		0	0	0	0	no fragment overlap	0	0.7461	74.9	0.0081		0
2252	516	2,3-DIMETHYL-1,3-BUTADIENE	Hexadecane	000513-81-5	C6H10	dry/wet	2.98	2.904	2.897	2.962	2.894	1.188	0.462	0.058	0.116	0.798	0.2	0.19	0	0.18	0.87	0.29	0.23	0	0.14	0.868	0.3887	15	0.0695	low similarity	1	0.746	61.9	0.0037		0	0	0	0	no fragment overlap	0	0.7461	74.9	0.0081		0
1942	516	PROPYNE	Hexadecane	000074-99-7	C3H4	dry/wet	0.68	0.924	0.39	0.85	0.471	0.66	0.581	0.114	0.14	0.427	0.26	0.35	0.09	0.09	0.45	0.15	0.24	0.05	0.12	0.4453	0.8229	85	0.0332		0	0.7665	67.2	0.0115		0	0.2134	32.2	0.011		0	0.8341	87	0.0514		0
1940	516	1-BUTYNE	Hexadecane	000107-00-6	C4H6	dry/wet	1.4	1.526	1.122	1.479	1.193	0.773	0.551	0.104	0.14	0.556	0.26	0.36	0.09	0.09	0.59	0.15	0.24	0.05	0.12	0.5862	0.8229	85	0.0332		0	0.7665	67.2	0.0115		0	0.2134	32.2	0.011		0	0.8341	87	0.0514		0
605	516	1-PENTYNE	Hexadecane	000627-19-0	C5H8	dry/wet	2.02	2.123	1.768	2.102	1.86	0.882	0.546	0.103	0.143	0.686	0.25	0.36	0.09	0.1	0.73	0.15	0.24	0.05	0.12	0.7271	0.8229	85	0.0332		0	0.7665	67.2	0.0115		0	0.2134	32.2	0.011		0	0.8341	87	0.0514		0
586	516	1-HEXYNE	Hexadecane	000693-02-7	C6H10	dry/wet	2.72	2.726	2.396	2.731	2.53	0.989	0.555	0.103	0.143	0.815	0.25	0.36	0.09	0.1	0.87	0.15	0.24	0.05	0.12	0.868	0.8229	85	0.0332		0	0.7665	67.2	0.0115		0	0.2134	32.2	0.011		0	0.8341	87	0.0514		0
737	516	1-OCTYNE	Hexadecane	000629-05-0	C8H14	dry/wet	4.04	3.929	3.645	3.987	3.866	1.208	0.576	0.106	0.144	1.075	0.25	0.37	0.09	0.1	1.15	0.15	0.24	0.05	0.12	1.1498	0.8229	85	0.0332		0	0.7665	67.2	0.0115		0	0.2134	32.2	0.011		0	0.8341	87	0.0514		0
1014	516	TETRAFLUOROMETHANE[R14]	Hexadecane	000075-73-0	CF4	dry/wet	1.49	1.24	2.553	0.923	2.402	-0.006	-0.061	0.046	-0.133	0.426	-0.47	-0.03	0	0	0.32	-0.49	-0.42	0	0	0.3203	0.6313	47.7	0.2027	high leverage	1	0.0106	0.1	0.2389	out of domain structural outlier	2	0	0	0	no fragment overlap	0	0	0	0	no fragment overlap	0
581	516	METHYLCHLORIDE	Hexadecane	000074-87-3	CH3Cl	dry/wet	0.76	1.189	0.704	1.108	0.707	0.573	0.462	0.069	0.079	0.364	0.13	0.31	0	0.03	0.37	0.13	0.15	0	0	0.3719	0.5558	33.3	0.0022		0	0.4394	21.7	0.0004	low similarity	1	0	0	0	no fragment overlap	0	0	0	0	no fragment overlap	0
47	516	CHLOROFORM	Hexadecane	000067-66-3	CHCl3	dry/wet	1.69	1.819	1.932	1.81	2.228	0.81	0.521	0.172	0.005	0.629	0.34	0.48	0.12	0	0.62	0.39	0.45	0	0	0.6167	0.6073	43.5	0.0197		0	0.578	36.6	0.0035		0	0	0	0	no fragment overlap	0	0	0	0	no fragment overlap	0
157	516	TETRACHLOROMETHANE	Hexadecane	000056-23-5	CCl4	dry/wet	2.88	2.752	3.425	2.848	3.472	0.926	0.298	0.067	-0.016	0.759	0.42	0.55	0	0	0.74	0.52	0.6	0	0	0.7391	0.4857	24.2	0.0349	low similarity	1	0.6167	41.8	0.0062		0	0	0	0	no fragment overlap	0	0	0	0	no fragment overlap	0
167	516	1,1,1-TRICHLOROETHANE[R140A]	Hexadecane	000071-55-6	C2H3Cl3	dry/wet	2.59	2.871	2.598	2.946	2.725	0.92	0.469	0.095	0.071	0.754	0.31	0.44	0	0.01	0.76	0.39	0.45	0	0	0.7576	0.6073	43.5	0.0197		0	0.578	36.6	0.0035		0	0	0	0	no fragment overlap	0	0	0	0	no fragment overlap	0
332	516	1-CHLOROPROPANE	Hexadecane	000540-54-5	C3H7Cl	dry/wet	1.96	2.393	1.995	2.365	2.012	0.8	0.451	0.051	0.094	0.619	0.13	0.32	0	0.03	0.65	0.2	0.32	0	0	0.6537	0.7377	69.2	0.0066		0	0.7947	71.2	0.0103		0	0	0	0	no fragment overlap	0	0	0	0	no fragment overlap	0
696	516	1,3-DICHLOROPROPANE	Hexadecane	000142-28-9	C3H6Cl2	dry/wet	1.71	2.785	1.201	2.789	1.592	0.937	0.876	0.112	0.209	0.75	0.25	0.46	0	0.03	0.78	0.4	0.87	0	0.17	0.7761	0.8448	89.1	0.0265		0	0.794	71.1	0.1601	high leverage	1	0	0	0	no fragment overlap	0	0.4023	20.3	0.1678	high leverage low similarity	1
920	516	SEC-BUTYLCHLORIDE	Hexadecane	000078-86-4	C4H9Cl	dry/wet	2.54	2.891	2.523	2.886	2.528	0.877	0.441	0.048	0.119	0.748	0.13	0.31	0	0.06	0.79	0.13	0.15	0	0	0.7946	0.5558	33.3	0.0022		0	0.4394	21.7	0.0004	low similarity	1	0	0	0	no fragment overlap	0	0	0	0	no fragment overlap	0
219	516	TERT-BUTYLCHLORIDE	Hexadecane	000507-20-0	C4H9Cl	dry/wet	3.02	2.926	2.227	2.929	2.167	0.89	0.45	0.056	0.17	0.745	0.11	0.26	0	0.07	0.79	0.13	0.15	0	0	0.7946	0.5558	33.3	0.0022		0	0.4394	21.7	0.0004	low similarity	1	0	0	0	no fragment overlap	0	0	0	0	no fragment overlap	0
1801	516	1-CHLOROHEXANE	Hexadecane	000544-10-5	C6H13Cl	dry/wet	3.78	4.191	3.924	4.242	4.097	1.112	0.492	0.048	0.086	1.011	0.12	0.33	0	0.04	1.08	0.2	0.44	0	0.08	1.0764	0.7377	69.2	0.0066		0	0.9102	91.2	0.04		0	0	0	0	no fragment overlap	0	0.9352	95.6	0.042		0
1091	516	1,1-DICHLOROETHENE	Hexadecane	000075-35-4	C2H2Cl2	dry/wet	2.29	1.738	2.333	1.735	2.419	0.847	0.38	0.096	-0.005	0.59	0.35	0.46	0	0.1	0.59	0.37	0.41	0	0.07	0.5922	0.7386	69.6	0.0098		0	0.6924	52.8	0.0025		0	0	0	0	no fragment overlap	0	0.6727	62.8	0.002		0
168	516	TRICHLOROETHYLENE	Hexadecane	000079-01-6	C2HCl3	dry/wet	2.68	2.029	2.883	2.047	3.082	1.015	0.447	0.108	-0.014	0.713	0.5	0.64	0	0.11	0.71	0.56	0.56	0	0.07	0.7146	0.6318	47.7	0.0268		0	0.5608	34.3	0.0045		0	0	0	0	no fragment overlap	0	0.6727	62.8	0.002		0
164	516	1,1,2,2-TETRACHLOROETHYLENE	Hexadecane	000127-18-4	C2Cl4	dry/wet	3.65	2.427	3.875	2.484	3.986	1.175	0.375	0.051	-0.018	0.836	0.6	0.73	0	0.12	0.84	0.63	0.71	0	0.01	0.837	0.6564	53	0.0354		0	0.5269	30.7	0.0072		0	0	0	0	no fragment overlap	0	0.5888	47.2	0.4152	structural outlier	2
30856	516	ETHYLBROMIDE	Hexadecane	000074-96-4	C2H5Br	dry/wet	1.58	2.006	1.497	2.052	1.514	0.817	0.494	0.055	0.103	0.533	0.31	0.4	0	0.03	0.57	0.34	0.39	0	0.09	0.5654	0.8018	81.2	0.019		0	0.9742	99	0.0263		0	0	0	0	no fragment overlap	0	0.8791	91	0.0371		0
30861	516	1-BROMOBUTANE	Hexadecane	000109-65-9	C4H9Br	dry/wet	2.82	3.211	2.711	3.31	2.8	1.069	0.521	0.052	0.109	0.783	0.31	0.41	0	0.04	0.85	0.34	0.39	0	0.09	0.8472	0.8018	81.2	0.019		0	0.9742	99	0.0263		0	0	0	0	no fragment overlap	0	0.8791	91	0.0371		0
410	516	2-BROMO-2-METHYLPROPANE	Hexadecane	000507-19-7	C4H9Br	dry/wet	3.24	3.146	2.345	3.25	2.369	1.045	0.548	0.048	0.175	0.783	0.29	0.34	0	0.07	0.85	0.3	0.25	0	0	0.8472	0.5525	32.9	0.018		0	0.6782	51	0.0086		0	0	0	0	no fragment overlap	0	0	0	0	no fragment overlap	0
12	516	DIETHYLETHER	Hexadecane	000060-29-7	C4H10O	dry/wet	0.85	1.603	1.682	1.358	1.379	0.764	0.367	0.029	0.262	0.69	0.04	0.34	0	0.25	0.73	0	0.26	0	0.51	0.7309	0	0	0	no fragment overlap	0	0.7658	66.6	0.0255		0	0	0	0	no fragment overlap	0	0	0	0.3439	out of domain structural outlier	2
774	516	OXACYCLOHEXANE	Hexadecane	000142-68-7	C5H10O	dry/wet	0.77	1.835	1.385	1.716	1.064	0.877	0.473	0.011	0.342	0.718	0.25	0.43	0	0.23	0.76	0.26	0.36	0	0.41	0.7632	0.6786	58.3	0.003		0	0.7145	56.6	0.014		0	0	0	0	no fragment overlap	0	0.7666	78.4	0.0424		0
1	516	ACETALDEHYDE	Hexadecane	000075-07-0	C2H4O	dry/wet	-1.34	-0.671	-0.933	-1.136	-1.145	0.531	0.672	0.038	0.388	0.392	0.24	0.72	0	0.32	0.41	0.17	0.63	0	0.27	0.4061	0.4992	26	0.0159		0	0.9083	90.7	0.0221		0	0	0	0	no fragment overlap	0	0.3319	12.6	0.0019	low similarity	1
399	516	PROPANAL	Hexadecane	000123-38-6	C3H6O	dry/wet	-0.71	-0.068	-0.197	-0.507	-0.42	0.605	0.633	0.025	0.386	0.52	0.24	0.73	0	0.32	0.55	0.17	0.63	0	0.46	0.547	0.4992	26	0.0159		0	0.9083	90.7	0.0221		0	0	0	0	no fragment overlap	0	0.9763	100	0.1445	high leverage	1
313	516	BUTANAL	Hexadecane	000123-72-8	C4H8O	dry/wet	-0.06	0.535	0.388	0.122	0.196	0.714	0.641	0.025	0.391	0.644	0.24	0.73	0	0.32	0.69	0.17	0.63	0	0.46	0.6879	0.4992	26	0.0159		0	0.9083	90.7	0.0221		0	0	0	0	no fragment overlap	0	0.9763	100	0.1445	high leverage	1
753	516	PENTANAL	Hexadecane	000110-62-3	C5H10O	dry/wet	0.63	1.136	1.019	0.749	0.864	0.823	0.654	0.022	0.398	0.78	0.23	0.74	0	0.33	0.83	0.17	0.63	0	0.46	0.8288	0.4992	26	0.0159		0	0.9083	90.7	0.0221		0	0	0	0	no fragment overlap	0	0.9763	100	0.1445	high leverage	1
754	516	HEXANAL	Hexadecane	000066-25-1	C6H12O	dry/wet	1.3	1.739	1.657	1.38	1.545	0.906	0.651	0.026	0.392	0.907	0.23	0.74	0	0.33	0.97	0.17	0.63	0	0.46	0.9697	0.4992	26	0.0159		0	0.9083	90.7	0.0221		0	0	0	0	no fragment overlap	0	0.9763	100	0.1445	high leverage	1
4	516	ACETONE	Hexadecane	000067-64-1	C3H6O	dry/wet	-1.09	-0.068	-0.888	-0.499	-1.163	0.63	0.712	0.046	0.485	0.515	0.22	0.67	0	0.34	0.55	0.12	0.64	0	0.5	0.547	0.5931	40.1	0.0018		0	0.6565	47.5	0.0268		0	0	0	0	no fragment overlap	0	0.334	13	0.0452	low similarity	1
40	516	2-BUTANONE	Hexadecane	000078-93-3	C4H8O	dry/wet	-0.43	0.535	-0.018	0.13	-0.272	0.692	0.668	0.033	0.461	0.649	0.21	0.67	0	0.34	0.69	0.12	0.63	0	0.48	0.6879	0.5931	40.1	0.0018		0	0.891	87.7	0.0084		0	0	0	0	no fragment overlap	0	0.4432	25.5	0.0579		0
137	516	2-PENTANONE	Hexadecane	000107-87-9	C5H10O	dry/wet	0.18	1.136	0.556	0.757	0.341	0.813	0.68	0.037	0.462	0.769	0.21	0.68	0	0.34	0.83	0.12	0.63	0	0.5	0.8288	0.5931	40.1	0.0018		0	0.891	87.7	0.0084		0	0	0	0	no fragment overlap	0	0.9604	99	0.0156		0
285	516	3-PENTANONE	Hexadecane	000096-22-0	C5H10O	dry/wet	0.31	1.136	0.859	0.757	0.643	0.776	0.628	0.027	0.425	0.775	0.21	0.68	0	0.34	0.83	0.12	0.62	0	0.46	0.8288	0.5931	40.1	0.0018		0	0.4682	24.4	0.0083	low similarity	1	0	0	0	no fragment overlap	0	0.1541	2.5	0.1913	out of domain	2
616	516	METHYLBUTYLKETONE	Hexadecane	000591-78-6	C6H12O	dry/wet	0.85	1.739	1.201	1.388	1.015	0.903	0.681	0.035	0.467	0.905	0.21	0.68	0	0.35	0.97	0.12	0.63	0	0.5	0.9697	0.5931	40.1	0.0018		0	0.891	87.7	0.0084		0	0	0	0	no fragment overlap	0	0.9604	99	0.0156		0
117	516	4-METHYL-2-PENTANONE	Hexadecane	000108-10-1	C6H12O	dry/wet	0.85	1.635	1.209	1.28	0.997	0.896	0.65	0.042	0.463	0.898	0.22	0.67	0	0.37	0.97	0.12	0.63	0	0.39	0.9697	0.5931	40.1	0.0018		0	0.891	87.7	0.0084		0	0	0	0	no fragment overlap	0	0.5731	45.1	0.0115		0
92	516	2-HEPTANONE	Hexadecane	000110-43-0	C7H14O	dry/wet	1.53	2.34	1.811	2.015	1.677	1.022	0.696	0.039	0.463	1.029	0.21	0.69	0	0.35	1.11	0.08	0.63	0	0.5	1.1106	0.3755	14	0.0344	low similarity	1	0.891	87.7	0.0084		0	0	0	0	no fragment overlap	0	0.9604	99	0.0156		0
287	516	4-HEPTANONE	Hexadecane	000123-19-3	C7H14O	dry/wet	1.57	2.34	1.99	2.015	1.829	1.008	0.649	0.031	0.444	1.027	0.21	0.69	0	0.35	1.11	0.23	0.62	0	0.51	1.1106	0	0	0.0616	out of domain	2	0.4682	24.4	0.0083	low similarity	1	0	0	0	no fragment overlap	0	0.7542	76.5	0.0303		0
976	516	2-OCTANONE	Hexadecane	000111-13-7	C8H16O	dry/wet	2.15	2.943	2.427	2.644	2.331	1.126	0.705	0.039	0.467	1.16	0.21	0.69	0	0.35	1.25	0.06	0.63	0	0.5	1.2515	0.4997	26.4	0.0795		0	0.891	87.7	0.0084		0	0	0	0	no fragment overlap	0	0.9604	99	0.0156		0
250	516	CYCLOHEXANONE	Hexadecane	000108-94-1	C6H10O	dry/wet	0.19	1.373	0.538	1.121	0.264	0.931	0.735	0.002	0.526	0.809	0.42	0.77	0	0.32	0.86	0.5	0.81	0	0.51	0.8611	0	0	0.0629	out of domain	2	0.6653	49.1	0.0098		0	0	0	0	no fragment overlap	0	0.7542	76.5	0.0303		0
82	516	METHYLACETATE	Hexadecane	000079-20-9	C3H6O2	dry/wet	-0.39	0.138	-0.493	-0.349	-0.62	0.57	0.757	0.044	0.446	0.585	0.07	0.57	0	0.36	0.61	0.11	0.61	0	0.4	0.6057	0.631	47.6	0.0298		0	0.6969	53.3	0.0096		0	0	0	0	no fragment overlap	0	0.5298	38.1	0.0225		0
21	516	ETHYLACETATE	Hexadecane	000141-78-6	C4H8O2	dry/wet	0.15	0.736	0.14	0.275	-0.011	0.667	0.735	0.033	0.464	0.716	0.07	0.58	0	0.36	0.75	0.07	0.62	0	0.48	0.7466	0.8503	90.3	0.0205		0	0.7051	54.7	0.0219		0	0	0	0	no fragment overlap	0	0.7374	72.8	0.0319		0
380	516	ISOPROPYLACETATE	Hexadecane	000108-21-4	C5H10O2	dry/wet	0.61	1.238	0.811	0.8	0.646	0.754	0.693	0.034	0.465	0.841	0.07	0.57	0	0.39	0.89	0.02	0.47	0	0.47	0.8875	0.7481	71.8	0.0652		0	0.7539	63.8	0.0068		0	0	0	0	no fragment overlap	0	0.8786	90.9	0.0227		0
373	516	ISOBUTYLACETATE	Hexadecane	000110-19-0	C6H12O2	dry/wet	1.43	1.837	1.396	1.425	1.287	0.859	0.716	0.038	0.468	0.972	0.07	0.57	0	0.4	1.03	0.07	0.47	0	0.42	1.0284	0.8503	90.3	0.0205		0	0.7539	63.8	0.0068		0	0	0	0	no fragment overlap	0	0.6373	55.6	0.0272		0
400	516	METHYLPROPIONATE	Hexadecane	000554-12-1	C4H8O2	dry/wet	0.28	0.736	0.094	0.275	-0.063	0.653	0.734	0.033	0.469	0.713	0.07	0.58	0	0.36	0.75	0.09	0.6	0	0.44	0.7466	0.4929	25.2	0.0079		0	0.9361	95.5	0.0047		0	0	0	0	no fragment overlap	0	0.4969	33.4	0.0519		0
720	516	METHYLBUTANOATE	Hexadecane	000623-42-7	C5H10O2	dry/wet	0.81	1.339	0.886	0.904	0.787	0.77	0.723	0.034	0.441	0.84	0.07	0.58	0	0.37	0.89	0.09	0.6	0	0.46	0.8875	0.4929	25.2	0.0079		0	0.9361	95.5	0.0047		0	0	0	0	no fragment overlap	0	0.9413	96.8	0.0122		0
371	516	ETHYLBUTYRATE	Hexadecane	000105-54-4	C6H12O2	dry/wet	1.44	1.935	1.537	1.526	1.434	0.879	0.711	0.024	0.452	0.97	0.06	0.59	0	0.37	1.03	0.05	0.61	0	0.46	1.0284	0.5959	41.3	0.0029		0	0.9213	92.8	0.0156		0	0	0	0	no fragment overlap	0	0.9371	95.8	0.0588		0
216	516	METHYLPENTANOATE	Hexadecane	000624-24-8	C6H12O2	dry/wet	1.51	1.935	1.508	1.526	1.467	0.87	0.744	0.032	0.439	0.969	0.06	0.59	0	0.37	1.03	0.09	0.6	0	0.46	1.0284	0.4929	25.2	0.0079		0	0.9361	95.5	0.0047		0	0	0	0	no fragment overlap	0	0.9413	96.8	0.0122		0
686	516	METHYLCAPROATE	Hexadecane	000106-70-7	C7H14O2	dry/wet	2.04	2.539	2.119	2.157	2.128	0.997	0.764	0.032	0.438	1.094	0.06	0.59	0	0.37	1.17	0.05	0.6	0	0.46	1.1693	0.411	16.5	0.0404	low similarity	1	0.9361	95.5	0.0047		0	0	0	0	no fragment overlap	0	0.9413	96.8	0.0122		0
3	516	ACETONITRILE	Hexadecane	000075-05-8	C2H3N	dry/wet	-1.11	-0.151	-1.608	-0.57	-1.633	0.504	0.837	0.106	0.417	0.391	0.19	0.72	0	0.2	0.4	0.17	0.56	0.05	0.18	0.4042	0.8597	91.7	0.0113		0	0.2974	9.7	0.0109	low similarity	1	0.2134	32.2	0.011		0	0.4544	26.8	0.0194		0
326	516	PROPIONITRILE	Hexadecane	000107-12-0	C3H5N	dry/wet	-0.74	0.452	-0.724	0.059	-0.828	0.598	0.767	0.06	0.422	0.519	0.19	0.73	0	0.2	0.55	0.17	0.56	0.05	0.3	0.5451	0.8597	91.7	0.0113		0	0.2974	9.7	0.0109	low similarity	1	0.2134	32.2	0.011		0	0.7429	73.4	0.0382		0
178	516	METHYLAMINE	Hexadecane	000074-89-5	CH5N	dry/wet	-2.04	-2.551	-1.804	-3.182	-2.353	0.571	0.359	0.279	0.435	0.322	0.21	0.49	0.21	0.57	0.35	0.26	0.32	0.27	0.26	0.3493	0.558	33.7	0.0112		0	0.6992	53.5	0.0019		0	0	0	0.012	out of domain	2	0.1311	1.3	0.0062	out of domain	2
320	516	ETHYLAMINE	Hexadecane	000075-04-7	C2H7N	dry/wet	-1.62	-1.949	-1.286	-2.553	-1.833	0.674	0.366	0.276	0.46	0.451	0.21	0.49	0.21	0.57	0.49	0.26	0.32	0.17	0.56	0.4902	0.558	33.7	0.0112		0	0.6992	53.5	0.0019		0	0.8347	87.5	0.0271		0	0.7619	77.9	0.0238		0
377	516	PROPYLAMINE	Hexadecane	000107-10-8	C3H9N	dry/wet	-1.08	-1.346	-0.468	-1.924	-0.975	0.752	0.333	0.276	0.433	0.582	0.2	0.5	0.21	0.58	0.63	0.26	0.32	0.17	0.56	0.6311	0.558	33.7	0.0112		0	0.6992	53.5	0.0019		0	0.8347	87.5	0.0271		0	0.7619	77.9	0.0238		0
240	516	BUTYLAMINE	Hexadecane	000109-73-9	C4H11N	dry/wet	-0.49	-0.745	0.134	-1.297	-0.339	0.85	0.338	0.278	0.437	0.711	0.2	0.5	0.21	0.58	0.77	0.2	0.32	0.17	0.56	0.772	0.7765	76.4	0.0252		0	0.6992	53.5	0.0019		0	0.8347	87.5	0.0271		0	0.7619	77.9	0.0238		0
1251	516	PENTYLAMINE	Hexadecane	000110-58-7	C5H13N	dry/wet	0.14	-0.143	0.777	-0.668	0.35	0.948	0.346	0.278	0.435	0.842	0.2	0.51	0.21	0.58	0.91	0.2	0.32	0.17	0.56	0.9129	0.7765	76.4	0.0252		0	0.6992	53.5	0.0019		0	0.8347	87.5	0.0271		0	0.7619	77.9	0.0238		0
105	516	HEXYLAMINE	Hexadecane	000111-26-2	C6H15N	dry/wet	0.76	0.455	1.217	-0.044	0.807	1.059	0.377	0.278	0.468	0.972	0.2	0.51	0.21	0.59	1.05	0.2	0.32	0.17	0.56	1.0538	0.7765	76.4	0.0252		0	0.6992	53.5	0.0019		0	0.8347	87.5	0.0271		0	0.7619	77.9	0.0238		0
2077	516	HEPTYLAMINE	Hexadecane	000111-68-2	C7H17N	dry/wet	1.39	1.057	2.015	0.584	1.691	1.171	0.382	0.277	0.434	1.099	0.2	0.52	0.21	0.59	1.19	0.2	0.32	0.17	0.56	1.1947	0.7765	76.4	0.0252		0	0.6992	53.5	0.0019		0	0.8347	87.5	0.0271		0	0.7619	77.9	0.0238		0
1147	516	1-OCTYLAMINE	Hexadecane	000111-86-4	C8H19N	dry/wet	1.84	1.659	2.483	1.213	2.172	1.271	0.4	0.282	0.464	1.233	0.19	0.52	0.21	0.59	1.34	0.2	0.32	0.17	0.56	1.3356	0.7765	76.4	0.0252		0	0.6992	53.5	0.0019		0	0.8347	87.5	0.0271		0	0.7619	77.9	0.0238		0
179	516	DIMETHYLAMINE	Hexadecane	000124-40-3	C2H7N	dry/wet	-1.55	-0.964	-0.265	-1.403	-0.75	0.668	0.311	0.179	0.343	0.455	0.16	0.34	0.13	0.47	0.49	0.17	0.32	0.21	0.53	0.4902	0.2386	5.8	0.0025	low similarity	1	0.6992	53.5	0.0019		0	0.0009	0.3	0.3082	out of domain structural outlier	2	0.2127	5.5	0.1791	high leverage low similarity	1
61	516	DIETHYLAMINE	Hexadecane	000109-89-7	C4H11N	dry/wet	-0.6	0.236	1.3	-0.151	0.888	0.867	0.277	0.165	0.308	0.716	0.15	0.35	0.13	0.48	0.77	0.17	0.32	0.02	0.59	0.772	0.2386	5.8	0.0025	low similarity	1	0.6992	53.5	0.0019		0	0.3635	48.3	0.4003	structural outlier	2	0.3023	10.8	0.0392	low similarity	1
103	516	DIISOPROPYLAMINE	Hexadecane	000108-18-9	C6H15N	dry/wet	0.53	1.237	2.317	0.897	1.918	1.044	0.288	0.159	0.35	0.964	0.17	0.33	0.13	0.54	1.05	0.17	0.32	0	0.72	1.0538	0.2386	5.8	0.0025	low similarity	1	0.6992	53.5	0.0019		0	0	0	0	no fragment overlap	0	0.2504	7.7	0.6227	structural outlier	2
533	516	TRIMETHYLAMINE	Hexadecane	000075-50-3	C3H9N	dry/wet	-0.73	-0.132	1.215	-0.517	0.781	0.798	0.283	0.066	0.264	0.581	0.17	0.36	0	0.53	0.63	0.17	0.32	0	0.62	0.6311	0.2386	5.8	0.0025	low similarity	1	0.6992	53.5	0.0019		0	0	0	0	no fragment overlap	0	0.3054	11	0.2454	high leverage low similarity	1
701	516	FORMAMIDE	Hexadecane	000075-12-7	CH3NO	dry/wet	-5.1	-4.294	-5.184	-5.256	-5.029	0.534	0.871	0.839	0.567	0.35	0.45	1.14	0.49	0.56	0.36	0.43	0.95	0.27	0.53	0.365	0.5847	38.1	0.0265		0	0.5512	33.2	0.0244		0	0	0	0.012	out of domain	2	0.74	72.9	0.0076		0
2	516	ACETAMIDE	Hexadecane	000060-35-5	C2H5NO	dry/wet	-4.68	-3.691	-4.633	-4.619	-4.642	0.607	0.883	0.716	0.668	0.479	0.42	1.09	0.49	0.57	0.51	0.38	0.79	0.39	0.65	0.5059	0.624	46.1	0.0113		0	0.6529	47.1	0.009		0	0.058	4.5	0.0316	out of domain	2	0.6666	60.6	0.0181		0
110	516	METHANOL	Hexadecane	000067-56-1	CH4O	dry/wet	-2.77	-1.72	-3.12	-2.173	-3.197	0.473	0.549	0.586	0.378	0.295	0.21	0.44	0.31	0.3	0.31	0.19	0.28	0.31	0.2	0.3082	0.0194	1.9	0.0022	out of domain	2	0.2446	7.5	0.0017	low similarity	1	0	0	0.0086	out of domain	2	0	0	0.0014	out of domain	2
11	516	ETHANOL	Hexadecane	000064-17-5	C2H6O	dry/wet	-2.19	-1.118	-2.421	-1.544	-2.526	0.564	0.522	0.562	0.391	0.424	0.21	0.45	0.31	0.31	0.45	0.19	0.37	0.33	0.33	0.4491	0.0194	1.9	0.0022	out of domain	2	0.8374	76.4	0.0078		0	0.296	43.7	0.034		0	0.3233	12.3	0.0151	low similarity	1
140	516	1-PROPANOL	Hexadecane	000071-23-8	C3H8O	dry/wet	-1.53	-0.517	-1.76	-0.917	-1.849	0.643	0.538	0.528	0.406	0.556	0.21	0.45	0.31	0.31	0.59	0.19	0.37	0.33	0.39	0.59	0.0194	1.9	0.0022	out of domain	2	0.8374	76.4	0.0078		0	0.296	43.7	0.034		0	0.3558	14.6	0.0213	low similarity	1
95	516	2-PROPANOL	Hexadecane	000067-63-0	C3H8O	dry/wet	-1.72	-0.62	-1.763	-1.024	-1.902	0.654	0.524	0.513	0.422	0.554	0.22	0.43	0.31	0.34	0.59	0.19	0.28	0.31	0.42	0.59	0.0194	1.9	0.0022	out of domain	2	0.2446	7.5	0.0017	low similarity	1	0	0	0.0086	out of domain	2	0	0	0.1444	out of domain	2
39	516	1-BUTANOL	Hexadecane	000071-36-3	C4H10O	dry/wet	-0.86	0.086	-1.262	-0.288	-1.32	0.75	0.524	0.567	0.409	0.682	0.2	0.46	0.31	0.31	0.73	0.19	0.37	0.36	0.47	0.7309	0.0194	1.9	0.0022	out of domain	2	0.8374	76.4	0.0078		0	0.4208	54.5	0.0196		0	0.9246	94.4	0.0188		0
120	516	2-METHYL-1-PROPANOL	Hexadecane	000078-83-1	C4H10O	dry/wet	-0.89	-0.018	-0.981	-0.395	-0.976	0.756	0.523	0.552	0.358	0.676	0.21	0.44	0.31	0.34	0.73	0.19	0.37	0.27	0.33	0.7309	0.0194	1.9	0.0022	out of domain	2	0.8374	76.4	0.0078		0	0.6981	79.2	0.0972	high leverage	1	0.3233	12.3	0.0151	low similarity	1
22	516	2-BUTANOL	Hexadecane	000078-92-2	C4H10O	dry/wet	-1.05	-0.018	-0.812	-0.395	-0.845	0.743	0.517	0.503	0.365	0.682	0.21	0.44	0.31	0.34	0.73	0.19	0.28	0.31	0.51	0.7309	0.0194	1.9	0.0022	out of domain	2	0.2446	7.5	0.0017	low similarity	1	0	0	0.0086	out of domain	2	0.7584	77.3	0.0354		0
153	516	TERT-BUTANOL	Hexadecane	000075-65-0	C4H10O	dry/wet	-1.32	0.014	-1.277	-0.355	-1.476	0.744	0.515	0.489	0.469	0.679	0.19	0.39	0.31	0.35	0.73	0.19	0.28	0.31	0.86	0.7309	0.0194	1.9	0.0022	out of domain	2	0.2446	7.5	0.0017	low similarity	1	0	0	0.0086	out of domain	2	0	0	0.6767	out of domain structural outlier	2
136	516	1-PENTANOL	Hexadecane	000071-41-0	C5H12O	dry/wet	-0.24	0.689	-0.578	0.341	-0.571	0.841	0.536	0.566	0.398	0.814	0.2	0.46	0.31	0.32	0.87	0.19	0.47	0.36	0.47	0.8718	0.0194	1.9	0.0022	out of domain	2	0.8971	89.3	0.0182		0	0.4208	54.5	0.0196		0	0.9246	94.4	0.0188		0
667	516	2-PENTANOL	Hexadecane	006032-29-7	C5H12O	dry/wet	-0.38	0.583	-0.208	0.232	-0.359	0.844	0.521	0.411	0.436	0.808	0.21	0.44	0.31	0.34	0.87	0.19	0.28	0.31	0.51	0.8718	0.0194	1.9	0.0022	out of domain	2	0.2446	7.5	0.0017	low similarity	1	0	0	0.0086	out of domain	2	0.7584	77.3	0.0354		0
668	516	3-PENTANOL	Hexadecane	000584-02-1	C5H12O	dry/wet	-0.33	0.583	0.104	0.232	0.03	0.837	0.507	0.412	0.374	0.807	0.21	0.44	0.31	0.34	0.87	0.19	0.28	0.31	0.59	0.8718	0.0194	1.9	0.0022	out of domain	2	0.2446	7.5	0.0017	low similarity	1	0	0	0.0086	out of domain	2	0.8535	88.7	0.0234		0
665	516	2-METHYL-1-BUTANOL	Hexadecane	000137-32-6	C5H12O	dry/wet	-0.23	0.583	-0.466	0.232	-0.568	0.821	0.551	0.453	0.444	0.807	0.21	0.44	0.31	0.34	0.87	0.19	0.37	0.27	0.33	0.8718	0.0194	1.9	0.0022	out of domain	2	0.8374	76.4	0.0078		0	0.6981	79.2	0.0972	high leverage	1	0.3233	12.3	0.0151	low similarity	1
266	516	3-METHYL-1-BUTANOL<ISOPENTANOL>	Hexadecane	000123-51-3	C5H12O	dry/wet	-0.23	0.583	-0.796	0.232	-0.835	0.834	0.545	0.565	0.435	0.809	0.21	0.44	0.31	0.34	0.87	0.19	0.37	0.33	0.39	0.8718	0.0194	1.9	0.0022	out of domain	2	0.8374	76.4	0.0078		0	0.296	43.7	0.034		0	0.3558	14.6	0.0213	low similarity	1
296	516	1-HEXANOL	Hexadecane	000111-27-3	C6H14O	dry/wet	0.38	1.29	0.035	0.969	0.055	0.948	0.56	0.535	0.418	0.942	0.2	0.46	0.31	0.32	1.01	0.19	0.47	0.36	0.47	1.0127	0.0194	1.9	0.0022	out of domain	2	0.8971	89.3	0.0182		0	0.4208	54.5	0.0196		0	0.9246	94.4	0.0188		0
195	516	2-METHYL-2-PENTANOL	Hexadecane	000590-36-3	C6H14O	dry/wet	0.2	1.218	0.28	0.901	0.219	0.929	0.522	0.468	0.419	0.933	0.19	0.4	0.31	0.35	1.01	0.19	0.28	0.31	0.61	1.0127	0.0194	1.9	0.0022	out of domain	2	0.2446	7.5	0.0017	low similarity	1	0	0	0.0086	out of domain	2	0.8501	88.4	0.0835		0
343	516	1-HEPTANOL	Hexadecane	000111-70-6	C7H16O	dry/wet	1.03	1.893	0.658	1.599	0.757	1.055	0.56	0.569	0.398	1.072	0.2	0.47	0.31	0.32	1.15	0.19	0.47	0.36	0.47	1.1536	0.0194	1.9	0.0022	out of domain	2	0.8971	89.3	0.0182		0	0.4208	54.5	0.0196		0	0.9246	94.4	0.0188		0
344	516	1-OCTANOL	Hexadecane	000111-87-5	C8H18O	dry/wet	1.62	2.489	1.291	2.22	1.429	1.161	0.565	0.572	0.398	1.203	0.2	0.47	0.31	0.32	1.29	0.19	0.47	0.36	0.47	1.2945	0.0194	1.9	0.0022	out of domain	2	0.8971	89.3	0.0182		0	0.4208	54.5	0.0196		0	0.9246	94.4	0.0188		0
127	516	1-NONANOL	Hexadecane	000143-08-8	C9H20O	dry/wet	2.27	3.087	1.963	2.844	2.126	1.267	0.593	0.536	0.412	1.335	0.2	0.48	0.31	0.33	1.44	0.19	0.47	0.36	0.47	1.4354	0.0194	1.9	0.0022	out of domain	2	0.8971	89.3	0.0182		0	0.4208	54.5	0.0196		0	0.9246	94.4	0.0188		0
345	516	1-DECANOL	Hexadecane	000112-30-1	C10H22O	dry/wet	2.96	3.691	2.551	3.475	2.761	1.39	0.614	0.537	0.415	1.461	0.19	0.48	0.31	0.33	1.58	0.19	0.47	0.36	0.47	1.5763	0.0194	1.9	0.0022	out of domain	2	0.8971	89.3	0.0182		0	0.4208	54.5	0.0196		0	0.9246	94.4	0.0188		0
1787	516	CYCLOPENTANOL	Hexadecane	000096-41-3	C5H10O	dry/wet	-0.79	0.217	-0.87	-0.034	-0.974	0.841	0.524	0.515	0.422	0.729	0.42	0.53	0.31	0.32	0.76	0.46	0.56	0.31	0.59	0.7632	0.666	54.5	0.0788		0	0.2001	4.3	0.0078	out of domain	2	0	0	0.0086	out of domain	2	0.8535	88.7	0.0234		0
252	516	CYCLOHEXANOL	Hexadecane	000108-93-0	C6H12O	dry/wet	-0.25	0.82	-0.498	0.596	-0.579	0.96	0.584	0.498	0.463	0.848	0.42	0.53	0.31	0.32	0.9	0.45	0.46	0.31	0.59	0.9041	0.8414	88.6	0.0046		0	0.4289	20.6	0.0035	low similarity	1	0	0	0.0086	out of domain	2	0.8535	88.7	0.0234		0
14	516	ALLYLALCOHOL	Hexadecane	000107-18-6	C3H6O	dry/wet	-1.74	-0.965	-2.111	-1.354	-2.024	0.717	0.707	0.531	0.399	0.522	0.33	0.51	0.31	0.36	0.55	0.31	0.48	0.33	0.4	0.547	0.7297	67.7	0.0038		0	0.9177	92.6	0.0084		0	0.296	43.7	0.034		0	0.349	14.2	0.0169	low similarity	1
1795	516	2,2,2-TRIFLUOROETHANOL	Hexadecane	000075-89-8	C2H3F3O	dry/wet	-1.93	-1.104	-2.45	-1.7	-1.747	0.159	0.607	0.964	0.15	0.57	-0.15	0.28	0.54	0.19	0.5	-0.13	0.26	0.41	0.33	0.5022	0.315	10.1	0.0139	low similarity	1	0.5287	31.1	0.0223		0	0.2417	35.7	0.0598	high leverage	1	0.3233	12.3	0.0151	low similarity	1
31	516	BENZENE	Hexadecane	000071-43-2	C6H6	dry/wet	2.15	1.953	2.182	1.973	2.308	1.173	0.598	0.059	0.102	0.674	0.56	0.69	0	0.12	0.72	0.58	0.6	0	0.13	0.7164	0.3858	14.7	0.0092	low similarity	1	0.7874	70.4	0.0024		0	0	0	0	no fragment overlap	0	0.6062	49.6	0.0039		0
161	516	TOLUENE	Hexadecane	000108-88-3	C7H8	dry/wet	2.68	2.684	2.749	2.792	2.879	1.315	0.606	0.056	0.121	0.802	0.58	0.63	0	0.12	0.86	0.63	0.62	0	0.16	0.8573	0.5953	40.7	0.0035		0	0.8573	81	0.0021		0	0	0	0	no fragment overlap	0	0.7763	79.5	0.0029		0
25	516	ETHYLBENZENE	Hexadecane	000100-41-4	C8H10	dry/wet	3.2	3.285	3.324	3.419	3.474	1.428	0.614	0.054	0.132	0.928	0.58	0.64	0	0.12	1	0.63	0.48	0	0.17	0.9982	0.5953	40.7	0.0035		0	0.942	96.3	0.011		0	0	0	0	no fragment overlap	0	0.8392	87.5	0.0042		0
322	516	O-XYLENE	Hexadecane	000095-47-6	C8H10	dry/wet	3.28	3.412	3.194	3.607	3.338	1.444	0.638	0.053	0.151	0.925	0.61	0.58	0	0.12	1	0.62	0.63	0	0.2	0.9982	0.6549	52.8	0.0067		0	0.8244	74.7	0.0044		0	0	0	0	no fragment overlap	0	0.7527	76.2	0.0069		0
369	516	PROPYLBENZENE	Hexadecane	000103-65-1	C9H12	dry/wet	3.84	3.887	3.934	4.048	4.113	1.552	0.623	0.052	0.136	1.053	0.58	0.64	0	0.12	1.14	0.63	0.48	0	0.17	1.1391	0.5953	40.7	0.0035		0	0.942	96.3	0.011		0	0	0	0	no fragment overlap	0	0.8392	87.5	0.0042		0
150	516	STYRENE	Hexadecane	000100-42-5	C8H8	dry/wet	2.95	2.836	2.707	2.982	2.98	1.672	0.815	0.082	0.171	0.891	0.7	0.7	0	0.17	0.96	0.86	0.65	0	0.16	0.9552	0.6793	58.6	0.0426		0	0.8862	85	0.0025		0	0	0	0	no fragment overlap	0	0.543	40.4	0.0041		0
471	516	BIPHENYL	Hexadecane	000092-52-4	C12H10	dry/wet	4.08	3.969	3.721	4.4	4.181	2.339	1.096	0.088	0.267	1.232	1.39	1.16	0	0.21	1.32	1.32	1.07	0	0.27	1.3242	0.5679	35.5	0.0134		0	0.8607	81.2	0.006		0	0	0	0	no fragment overlap	0	0.6182	52.1	0.0119		0
123	516	NAPHTHALENE	Hexadecane	000091-20-3	C10H8	dry/wet	3.41	3.262	3.197	3.673	3.534	2.055	0.936	0.077	0.202	1.018	1.27	1.02	0	0.17	1.09	1.28	0.93	0	0.18	1.0854	0.4324	18.5	0.0099	low similarity	1	0.7946	71.1	0.0038		0	0	0	0	no fragment overlap	0	0.6351	55.2	0.007		0
1169	516	ACENAPHTHYLENE-1,2-DIHYDRO	Hexadecane	000083-32-9	C12H10	dry/wet	4.16	4.359	3.964	5.046	4.266	2.33	0.96	0.055	0.247	1.19	1.53	0.99	0	0.15	1.26	1.58	1.07	0	0.27	1.2586	0.6334	47.9	0.1371	high leverage	1	0.6768	50.5	0.0085		0	0	0	0	no fragment overlap	0	0.7471	75.1	0.0146		0
1181	516	9H-FLUORENE	Hexadecane	000086-73-7	C13H10	dry/wet	4.4	4.464	3.793	5.144	4.231	2.587	1.163	0.082	0.311	1.279	1.65	1.13	0	0.19	1.36	1.69	1.16	0	0.37	1.3565	0.3057	9.5	0.5967	structural outlier	2	0.6605	48.1	0.0851	high leverage	1	0	0	0	no fragment overlap	0	0.4173	22	0.0204	low similarity	1
927	516	PHENANTHRENE	Hexadecane	000085-01-8	C14H10	dry/wet	4.74	4.566	4.119	5.367	4.612	3.016	1.258	0.111	0.321	1.357	1.99	1.34	0	0.23	1.45	2.07	1.25	0	0.22	1.4544	0.6251	46.3	0.1686	high leverage	1	0.6533	47.1	0.007		0	0	0	0	no fragment overlap	0	0.6043	49.3	0.011		0
28	516	P-DICHLOROBENZENE	Hexadecane	000106-46-7	C6H4Cl2	dry/wet	3.7	3.008	3.143	3.206	3.532	1.543	0.757	0.123	0.092	0.934	0.86	0.88	0	0.1	0.96	0.86	0.53	0	0.05	0.9612	0.7582	73.3	0.0054		0	0.6394	45.4	0.0822		0	0	0	0	no fragment overlap	0	0.779	79.7	0.0026		0
961	516	1,2,3-TRICHLOROBENZENE	Hexadecane	000087-61-6	C6H3Cl3	dry/wet	4.13	3.858	3.825	4.178	4.151	1.689	0.717	0.101	0.108	1.051	0.95	0.92	0	0.04	1.08	1	0.84	0	0.05	1.0836	0.8256	85.5	0.0065		0	0.8469	78.4	0.0028		0	0	0	0	no fragment overlap	0	0.7654	78.4	0.0008		0
467	516	1,2,4-TRICHLOROBENZENE	Hexadecane	000120-82-1	C6H3Cl3	dry/wet	4.43	3.849	3.779	4.165	4.163	1.738	0.753	0.124	0.099	1.055	0.96	0.95	0	0.03	1.08	1	0.84	0	0.03	1.0836	0.881	94.7	0.0053		0	0.8469	78.4	0.0028		0	0	0	0	no fragment overlap	0	0.8852	91.9	0.0026		0
2374	516	1,3,5-TRICHLOROBENZENE	Hexadecane	000108-70-3	C6H3Cl3	dry/wet	4.48	3.951	3.947	4.303	4.349	1.75	0.731	0.133	0.074	1.063	0.97	0.91	0	0.02	1.08	1.01	0.84	0	0.01	1.0836	0.7927	80	0.0077		0	0.8469	78.4	0.0028		0	0	0	0	no fragment overlap	0	0.8486	88.3	0.0064		0
609	516	ETHOXYBENZENE	Hexadecane	000103-73-1	C8H10O	dry/wet	2.61	2.292	2.604	2.216	2.85	1.476	0.853	0.057	0.264	0.993	0.62	0.79	0	0.33	1.06	0.66	0.53	0	0.35	1.0569	0.7578	73.2	0.0062		0	0.8226	74.5	0.0015		0	0	0	0	no fragment overlap	0	0.5934	47.9	0.0116		0
79	516	BENZALDEHYDE	Hexadecane	000100-52-7	C7H6O	dry/wet	1.06	0.62	0.665	0.349	0.77	1.34	0.998	0.06	0.444	0.829	0.81	1.18	0	0.4	0.87	0.86	0.99	0	0.37	0.873	0.6335	47.9	0.0237		0	0.7692	67.7	0.0275		0	0	0	0	no fragment overlap	0	0.5649	44.1	0.0031		0
372	516	ACETOPHENONE	Hexadecane	000098-86-2	C8H8O	dry/wet	1.14	1.221	0.906	0.985	1.003	1.421	1.037	0.062	0.504	0.953	0.79	1.13	0	0.42	1.01	0.75	1	0	0.5	1.0139	0.7123	64.1	0.0047		0	0.7686	67.6	0.0079		0	0	0	0	no fragment overlap	0	0.5913	47.4	0.0455		0
310	516	METHYLBENZOATE	Hexadecane	000093-58-3	C8H8O2	dry/wet	1.56	1.424	1.55	1.131	1.749	1.421	1.015	0.065	0.437	1.019	0.64	1.03	0	0.45	1.07	0.72	0.97	0	0.46	1.0726	0.7633	74.1	0.0109		0	0.8651	82.1	0.0055		0	0	0	0	no fragment overlap	0	0.6767	63.3	0.0425		0
854	516	O-CHLOROANILINE	Hexadecane	000095-51-2	C6H6ClN	dry/wet	1.07	0.176	0.938	-0.041	1.594	1.529	0.88	0.546	0.145	0.884	0.99	1.16	0.23	0.42	0.94	1.04	1.09	0.13	0.33	0.9386	0.6135	44.5	0.013		0	0.8206	74.4	0.0068		0	0	0	0.1135	out of domain structural outlier	2	0.8198	85.5	0.0064		0
855	516	M-CHLOROANILINE	Hexadecane	000108-42-9	C6H6ClN	dry/wet	0.64	0.178	0.3	-0.023	1.095	1.541	0.952	0.686	0.157	0.891	0.99	1.15	0.3	0.37	0.94	1.05	1.09	0.13	0.39	0.9386	0.6245	46.2	0.0138		0	0.8206	74.4	0.0068		0	0	0	0.1458	out of domain structural outlier	2	0.7236	70.4	0.0915		0
856	516	P-CHLOROANILINE	Hexadecane	000106-47-8	C6H6ClN	dry/wet	0.56	-0.05	0.283	-0.288	1.073	1.538	0.984	0.654	0.174	0.892	1.01	1.19	0.28	0.42	0.94	1.07	0.98	0.27	0.31	0.9386	0.7505	72	0.0097		0	0.6562	47.4	0.0269		0	0	0	0.012	out of domain	2	0.7859	81.4	0.007		0
857	516	2-NITROANILINE	Hexadecane	000088-74-4	C6H6N2O2	dry/wet	0.22	-0.067	-0.984	-0.339	-0.567	1.601	1.082	0.602	0.485	0.932	1.16	1.44	0.18	0.48	0.99	1.17	1.49	0.13	0.47	0.9904	0.8543	91	0.0157		0	0.5068	28.8	0.0097		0	0	0	0.1135	out of domain structural outlier	2	0.6193	52.5	0.0109		0
30	516	NITROBENZENE	Hexadecane	000098-95-3	C6H5NO2	dry/wet	1.54	1.515	1.077	1.35	1.368	1.278	1.009	0.088	0.354	0.859	0.83	1.26	0	0.21	0.89	0.87	1.08	0	0.23	0.8906	0.3069	9.6	0.0073	low similarity	1	0.8069	72.5	0.0048		0	0	0	0	no fragment overlap	0	0.8404	87.5	0.0061		0
489	516	O-NITROTOLUENE	Hexadecane	000088-72-2	C7H7NO2	dry/wet	2.25	2.243	1.488	2.165	1.714	1.442	1.019	0.068	0.408	0.974	0.85	1.2	0	0.21	1.03	0.86	1.09	0	0.27	1.0315	0.8128	83.4	0.0099		0	0.5761	36.5	0.0049		0	0	0	0	no fragment overlap	0	0.8169	85.3	0.0066		0
130	516	2-METHYLPHENOL(O-CRESOL)	Hexadecane	000095-48-7	C7H8O	dry/wet	-0.09	-0.369	-0.536	-0.618	0.273	1.333	0.944	0.79	0.198	0.86	0.81	0.84	0.5	0.39	0.92	0.76	0.82	0.41	0.34	0.916	0.6328	47.8	0.0089		0	0.7442	61.7	0.003		0	0	0	0.0044	out of domain	2	0.6375	55.6	0.0031		0
132	516	4-METHYLPHENOL(P-CRESOL)	Hexadecane	000106-44-5	C7H8O	dry/wet	-0.19	-0.369	-0.64	-0.618	0.149	1.333	0.96	0.783	0.222	0.863	0.81	0.84	0.5	0.39	0.92	0.82	0.97	0.53	0.32	0.916	0.7117	63.9	0.0265		0	0.8096	73.2	0.0263		0	0.1056	14.3	0.0437	low similarity	1	0.7551	76.6	0.0034		0
812	516	P-CHLOROPHENOL	Hexadecane	000106-48-9	C6H5ClO	dry/wet	-0.75	-1.182	-0.922	-1.506	0.079	1.361	1.006	0.93	0.163	0.866	0.94	1.01	0.67	0.38	0.9	0.92	0.92	0.53	0.25	0.8975	0.7256	66.6	0.0271		0	0.7361	60.3	0.0452		0	0.1056	14.3	0.0437	low similarity	1	0.71	68.9	0.0027		0
608	516	3-NITROPHENOL	Hexadecane	000554-84-7	C6H5NO3	dry/wet	-1.37	-2.226	-2.486	-2.829	-1.407	1.309	1.252	1.042	0.362	0.92	1.05	1.47	0.69	0.49	0.95	1.01	1.48	0.68	0.39	0.9493	0.791	79.8	0.0125		0	0.5722	35.8	0.0515		0	0.2965	43.9	0.1134	structural outlier	2	0.6693	61.1	0.0063		0
619	516	4-NITROPHENOL	Hexadecane	000100-02-7	C6H5NO3	dry/wet	-1.93	-2.155	-2.948	-2.748	-1.855	1.371	1.323	1.081	0.413	0.92	1.05	1.47	0.67	0.49	0.95	1.06	1.57	0.53	0.39	0.9493	0.6963	61.7	0.0299		0	0.5353	31.6	0.095	high leverage	1	0.1056	14.3	0.0437	low similarity	1	0.6693	61.1	0.0063		0
1644	516	2-PHENYLETHANOL	Hexadecane	000060-12-8	C8H10O	dry/wet	-0.36	0.774	-0.962	0.568	-0.575	1.371	1.072	0.57	0.535	0.997	0.78	0.91	0.31	0.4	1.06	0.82	0.85	0.33	0.56	1.0569	0.8946	95.6	0.0055		0	0.7952	71.3	0.0184		0	0.296	43.7	0.034		0	0.6534	58.2	0.0255		0
637	516	2,4,6-TRIMETHYL-1,3,5-TRIOXANE	Hexadecane	000123-63-7	C6H12O3	dry/wet	0.24	0.136	0.381	-0.389	0.288	0.924	0.948	0.031	0.629	0.989	0.36	0.69	0	0.74	1.02	0.26	1.15	0	1.14	1.0215	0.6786	58.3	0.003		0	0.2871	9.4	0.7152	structural outlier	2	0	0	0	no fragment overlap	0	0.4011	20.2	0.1644	high leverage low similarity	1
1569	516	METHYLPYRAZINE	Hexadecane	000109-08-0	C5H6N2	dry/wet	-0.79	0.301	-0.421	0.078	-0.655	1.11	0.87	0.075	0.586	0.74	0.65	0.76	0	0.5	0.78	0.65	0.94	0	0.59	0.7751	0.4796	23.8	0.0084	low similarity	1	0.8366	75.9	0.0111		0	0	0	0	no fragment overlap	0	0.3074	11.2	0.008	low similarity	1
30991	516	THIOPHENE	Hexadecane	000110-02-1	C4H4S	dry/wet	1.78	1.994	1.617	2.046	1.838	1.111	0.685	0.093	0.112	0.626	0.5	0.62	0	0.06	0.64	0.63	0.83	0	0.19	0.6411	0.5783	37	0.0141		0	0.6595	47.9	0.0228		0	0	0	0	no fragment overlap	0	0.6304	54.2	0.0101		0
1051	50	METHANE	Cyclohexane	000074-82-8	CH4	dry/wet	1.33	0.961	1.432	0.555	1.119	0.516	0.15	0.035	-0.042	0.228	0.11	0.21	0	0.01	0.25	0	0	0	0	0.2495	0	0	0	no fragment overlap	0	0	0	0	no fragment overlap	0	0	0	0	no fragment overlap	0	0	0	0	no fragment overlap	0
41	50	BUTANE	Cyclohexane	000106-97-8	C4H10	dry/wet	3.62	2.753	3.545	2.118	3.005	0.779	0.118	0.043	-0.063	0.617	0	0.18	0	0.04	0.67	0	0	0	0	0.6722	0	0	0	no fragment overlap	0	0	0	0	no fragment overlap	0	0	0	0	no fragment overlap	0	0	0	0	no fragment overlap	0
134	50	PENTANE	Cyclohexane	000109-66-0	C5H12	dry/wet	4.27	3.375	4.199	2.709	3.577	0.876	0.106	0.049	-0.06	0.747	0	0.19	0	0.04	0.81	0	0	0	0	0.8131	0	0	0	no fragment overlap	0	0	0	0	no fragment overlap	0	0	0	0	no fragment overlap	0	0	0	0	no fragment overlap	0
12	50	DIETHYLETHER	Cyclohexane	000060-29-7	C4H10O	dry/wet	0.66	1.75	1.9	1.175	1.397	0.764	0.367	0.029	0.262	0.69	0.04	0.34	0	0.25	0.73	0	0.26	0	0.51	0.7309	0	0	0	no fragment overlap	0	0.7658	66.6	0.0255		0	0	0	0	no fragment overlap	0	0	0	0.3439	out of domain structural outlier	2
4	50	ACETONE	Cyclohexane	000067-64-1	C3H6O	dry/wet	-0.96	0.047	-0.747	-0.394	-0.915	0.63	0.712	0.046	0.485	0.515	0.22	0.67	0	0.34	0.55	0.12	0.64	0	0.5	0.547	0.5931	40.1	0.0018		0	0.6565	47.5	0.0268		0	0	0	0	no fragment overlap	0	0.334	13	0.0452	low similarity	1
40	50	2-BUTANONE	Cyclohexane	000078-93-3	C4H8O	dry/wet	-0.25	0.67	0.155	0.196	-0.121	0.692	0.668	0.033	0.461	0.649	0.21	0.67	0	0.34	0.69	0.12	0.63	0	0.48	0.6879	0.5931	40.1	0.0018		0	0.891	87.7	0.0084		0	0	0	0	no fragment overlap	0	0.4432	25.5	0.0579		0
137	50	2-PENTANONE	Cyclohexane	000107-87-9	C5H10O	dry/wet	0.44	1.29	0.759	0.784	0.429	0.813	0.68	0.037	0.462	0.769	0.21	0.68	0	0.34	0.83	0.12	0.63	0	0.5	0.8288	0.5931	40.1	0.0018		0	0.891	87.7	0.0084		0	0	0	0	no fragment overlap	0	0.9604	99	0.0156		0
616	50	METHYLBUTYLKETONE	Cyclohexane	000591-78-6	C6H12O	dry/wet	1.12	1.913	1.434	1.377	1.027	0.903	0.681	0.035	0.467	0.905	0.21	0.68	0	0.35	0.97	0.12	0.63	0	0.5	0.9697	0.5931	40.1	0.0018		0	0.891	87.7	0.0084		0	0	0	0	no fragment overlap	0	0.9604	99	0.0156		0
92	50	2-HEPTANONE	Cyclohexane	000110-43-0	C7H14O	dry/wet	1.78	2.534	2.074	1.965	1.618	1.022	0.696	0.039	0.463	1.029	0.21	0.69	0	0.35	1.11	0.08	0.63	0	0.5	1.1106	0.3755	14	0.0344	low similarity	1	0.891	87.7	0.0084		0	0	0	0	no fragment overlap	0	0.9604	99	0.0156		0
82	50	METHYLACETATE	Cyclohexane	000079-20-9	C3H6O2	dry/wet	-0.19	0.249	-0.35	-0.362	-0.482	0.57	0.757	0.044	0.446	0.585	0.07	0.57	0	0.36	0.61	0.11	0.61	0	0.4	0.6057	0.631	47.6	0.0298		0	0.6969	53.3	0.0096		0	0	0	0	no fragment overlap	0	0.5298	38.1	0.0225		0
21	50	ETHYLACETATE	Cyclohexane	000141-78-6	C4H8O2	dry/wet	0.34	0.867	0.315	0.224	0.074	0.667	0.735	0.033	0.464	0.716	0.07	0.58	0	0.36	0.75	0.07	0.62	0	0.48	0.7466	0.8503	90.3	0.0205		0	0.7051	54.7	0.0219		0	0	0	0	no fragment overlap	0	0.7374	72.8	0.0319		0
400	50	METHYLPROPIONATE	Cyclohexane	000554-12-1	C4H8O2	dry/wet	0.57	0.867	0.268	0.224	0.025	0.653	0.734	0.033	0.469	0.713	0.07	0.58	0	0.36	0.75	0.09	0.6	0	0.44	0.7466	0.4929	25.2	0.0079		0	0.9361	95.5	0.0047		0	0	0	0	no fragment overlap	0	0.4969	33.4	0.0519		0
216	50	METHYLPENTANOATE	Cyclohexane	000624-24-8	C6H12O2	dry/wet	1.81	2.105	1.744	1.398	1.387	0.87	0.744	0.032	0.439	0.969	0.06	0.59	0	0.37	1.03	0.09	0.6	0	0.46	1.0284	0.4929	25.2	0.0079		0	0.9361	95.5	0.0047		0	0	0	0	no fragment overlap	0	0.9413	96.8	0.0122		0
686	50	METHYLCAPROATE	Cyclohexane	000106-70-7	C7H14O2	dry/wet	2.39	2.728	2.387	1.991	1.981	0.997	0.764	0.032	0.438	1.094	0.06	0.59	0	0.37	1.17	0.05	0.6	0	0.46	1.1693	0.411	16.5	0.0404	low similarity	1	0.9361	95.5	0.0047		0	0	0	0	no fragment overlap	0	0.9413	96.8	0.0122		0
3	50	ACETONITRILE	Cyclohexane	000075-05-8	C2H3N	dry/wet	-1.46	-0.055	-1.513	-0.623	-1.417	0.504	0.837	0.106	0.417	0.391	0.19	0.72	0	0.2	0.4	0.17	0.56	0.05	0.18	0.4042	0.8597	91.7	0.0113		0	0.2974	9.7	0.0109	low similarity	1	0.2134	32.2	0.011		0	0.4544	26.8	0.0194		0
320	50	ETHYLAMINE	Cyclohexane	000075-04-7	C2H7N	dry/wet	-1.8	-1.879	-1.162	-2.226	-1.532	0.674	0.366	0.276	0.46	0.451	0.21	0.49	0.21	0.57	0.49	0.26	0.32	0.17	0.56	0.4902	0.558	33.7	0.0112		0	0.6992	53.5	0.0019		0	0.8347	87.5	0.0271		0	0.7619	77.9	0.0238		0
377	50	PROPYLAMINE	Cyclohexane	000107-10-8	C3H9N	dry/wet	-0.98	-1.257	-0.313	-1.636	-0.772	0.752	0.333	0.276	0.433	0.582	0.2	0.5	0.21	0.58	0.63	0.26	0.32	0.17	0.56	0.6311	0.558	33.7	0.0112		0	0.6992	53.5	0.0019		0	0.8347	87.5	0.0271		0	0.7619	77.9	0.0238		0
240	50	BUTYLAMINE	Cyclohexane	000109-73-9	C4H11N	dry/wet	-0.29	-0.636	0.319	-1.048	-0.207	0.85	0.338	0.278	0.437	0.711	0.2	0.5	0.21	0.58	0.77	0.2	0.32	0.17	0.56	0.772	0.7765	76.4	0.0252		0	0.6992	53.5	0.0019		0	0.8347	87.5	0.0271		0	0.7619	77.9	0.0238		0
61	50	DIETHYLAMINE	Cyclohexane	000109-89-7	C4H11N	dry/wet	-0.34	0.366	1.516	-0.022	0.94	0.867	0.277	0.165	0.308	0.716	0.15	0.35	0.13	0.48	0.77	0.17	0.32	0.02	0.59	0.772	0.2386	5.8	0.0025	low similarity	1	0.6992	53.5	0.0019		0	0.3635	48.3	0.4003	structural outlier	2	0.3023	10.8	0.0392	low similarity	1
533	50	TRIMETHYLAMINE	Cyclohexane	000075-50-3	C3H9N	dry/wet	-0.44	-0.002	1.421	-0.211	0.9	0.798	0.283	0.066	0.264	0.581	0.17	0.36	0	0.53	0.63	0.17	0.32	0	0.62	0.6311	0.2386	5.8	0.0025	low similarity	1	0.6992	53.5	0.0019		0	0	0	0	no fragment overlap	0	0.3054	11	0.2454	high leverage low similarity	1
2	50	ACETAMIDE	Cyclohexane	000060-35-5	C2H5NO	dry/wet	-4.88	-3.672	-4.625	-4.281	-4.378	0.607	0.883	0.716	0.668	0.479	0.42	1.09	0.49	0.57	0.51	0.38	0.79	0.39	0.65	0.5059	0.624	46.1	0.0113		0	0.6529	47.1	0.009		0	0.058	4.5	0.0316	out of domain	2	0.6666	60.6	0.0181		0
110	50	METHANOL	Cyclohexane	000067-56-1	CH4O	dry/wet	-2.49	-1.672	-3.096	-2.16	-2.996	0.473	0.549	0.586	0.378	0.295	0.21	0.44	0.31	0.3	0.31	0.19	0.28	0.31	0.2	0.3082	0.0194	1.9	0.0022	out of domain	2	0.2446	7.5	0.0017	low similarity	1	0	0	0.0086	out of domain	2	0	0	0.0014	out of domain	2
11	50	ETHANOL	Cyclohexane	000064-17-5	C2H6O	dry/wet	-1.89	-1.05	-2.363	-1.57	-2.379	0.564	0.522	0.562	0.391	0.424	0.21	0.45	0.31	0.31	0.45	0.19	0.37	0.33	0.33	0.4491	0.0194	1.9	0.0022	out of domain	2	0.8374	76.4	0.0078		0	0.296	43.7	0.034		0	0.3233	12.3	0.0151	low similarity	1
140	50	1-PROPANOL	Cyclohexane	000071-23-8	C3H8O	dry/wet	-1.49	-0.43	-1.671	-0.982	-1.765	0.643	0.538	0.528	0.406	0.556	0.21	0.45	0.31	0.31	0.59	0.19	0.37	0.33	0.39	0.59	0.0194	1.9	0.0022	out of domain	2	0.8374	76.4	0.0078		0	0.296	43.7	0.034		0	0.3558	14.6	0.0213	low similarity	1
39	50	1-BUTANOL	Cyclohexane	000071-36-3	C4H10O	dry/wet	-0.87	0.193	-1.147	-0.391	-1.309	0.75	0.524	0.567	0.409	0.682	0.2	0.46	0.31	0.31	0.73	0.19	0.37	0.36	0.47	0.7309	0.0194	1.9	0.0022	out of domain	2	0.8374	76.4	0.0078		0	0.4208	54.5	0.0196		0	0.9246	94.4	0.0188		0
120	50	2-METHYL-1-PROPANOL	Cyclohexane	000078-83-1	C4H10O	dry/wet	-0.85	0.089	-0.861	-0.452	-1	0.756	0.523	0.552	0.358	0.676	0.21	0.44	0.31	0.34	0.73	0.19	0.37	0.27	0.33	0.7309	0.0194	1.9	0.0022	out of domain	2	0.8374	76.4	0.0078		0	0.6981	79.2	0.0972	high leverage	1	0.3233	12.3	0.0151	low similarity	1
22	50	2-BUTANOL	Cyclohexane	000078-92-2	C4H10O	dry/wet	-0.96	0.089	-0.685	-0.452	-0.859	0.743	0.517	0.503	0.365	0.682	0.21	0.44	0.31	0.34	0.73	0.19	0.28	0.31	0.51	0.7309	0.0194	1.9	0.0022	out of domain	2	0.2446	7.5	0.0017	low similarity	1	0	0	0.0086	out of domain	2	0.7584	77.3	0.0354		0
153	50	TERT-BUTANOL	Cyclohexane	000075-65-0	C4H10O	dry/wet	-1.15	0.121	-1.155	-0.422	-1.393	0.744	0.515	0.489	0.469	0.679	0.19	0.39	0.31	0.35	0.73	0.19	0.28	0.31	0.86	0.7309	0.0194	1.9	0.0022	out of domain	2	0.2446	7.5	0.0017	low similarity	1	0	0	0.0086	out of domain	2	0	0	0.6767	out of domain structural outlier	2
136	50	1-PENTANOL	Cyclohexane	000071-41-0	C5H12O	dry/wet	-0.26	0.815	-0.434	0.199	-0.649	0.841	0.536	0.566	0.398	0.814	0.2	0.46	0.31	0.32	0.87	0.19	0.47	0.36	0.47	0.8718	0.0194	1.9	0.0022	out of domain	2	0.8971	89.3	0.0182		0	0.4208	54.5	0.0196		0	0.9246	94.4	0.0188		0
667	50	2-PENTANOL	Cyclohexane	006032-29-7	C5H12O	dry/wet	-0.39	0.71	-0.042	0.135	-0.364	0.844	0.521	0.411	0.436	0.808	0.21	0.44	0.31	0.34	0.87	0.19	0.28	0.31	0.51	0.8718	0.0194	1.9	0.0022	out of domain	2	0.2446	7.5	0.0017	low similarity	1	0	0	0.0086	out of domain	2	0.7584	77.3	0.0354		0
296	50	1-HEXANOL	Cyclohexane	000111-27-3	C6H14O	dry/wet	0.45	1.436	0.213	0.789	-0.074	0.948	0.56	0.535	0.418	0.942	0.2	0.46	0.31	0.32	1.01	0.19	0.47	0.36	0.47	1.0127	0.0194	1.9	0.0022	out of domain	2	0.8971	89.3	0.0182		0	0.4208	54.5	0.0196		0	0.9246	94.4	0.0188		0
693	50	2-HEXANOL	Cyclohexane	000626-93-7	C6H14O	dry/wet	0.23	1.332	0.608	0.726	0.302	0.956	0.534	0.496	0.373	0.937	0.21	0.45	0.31	0.35	1.01	0.19	0.28	0.31	0.51	1.0127	0.0194	1.9	0.0022	out of domain	2	0.2446	7.5	0.0017	low similarity	1	0	0	0.0086	out of domain	2	0.7584	77.3	0.0354		0
343	50	1-HEPTANOL	Cyclohexane	000111-70-6	C7H16O	dry/wet	1.12	2.059	0.863	1.38	0.532	1.055	0.56	0.569	0.398	1.072	0.2	0.47	0.31	0.32	1.15	0.19	0.47	0.36	0.47	1.1536	0.0194	1.9	0.0022	out of domain	2	0.8971	89.3	0.0182		0	0.4208	54.5	0.0196		0	0.9246	94.4	0.0188		0
1795	50	2,2,2-TRIFLUOROETHANOL	Cyclohexane	000075-89-8	C2H3F3O	dry/wet	-2.04	-1.089	-2.471	-2.305	-2.124	0.159	0.607	0.964	0.15	0.57	-0.15	0.28	0.54	0.19	0.5	-0.13	0.26	0.41	0.33	0.5022	0.315	10.1	0.0139	low similarity	1	0.5287	31.1	0.0223		0	0.2417	35.7	0.0598	high leverage	1	0.3233	12.3	0.0151	low similarity	1
1306	50	TRIMETHYL-PHOSPHATE	Cyclohexane	000512-56-1	C3H9O4P	dry/wet	-2.22	-2.336	-0.954	-2.308	-1.057	0.666	1.112	0.07	0.76	0.926	0.27	0.68	0	1.22	0.97	-0.11	0.99	0	-0.15	0.9707	0.3019	8.9	0.0598	low similarity	1	0.2332	6	0.0693	low similarity	1	0	0	0	no fragment overlap	0	0.523	37.3	5.4499	leverage > 1	3
1304	50	TRIETHYL-PHOSPHATE	Cyclohexane	000078-40-0	C6H15O4P	dry/wet	-0.14	-0.475	0.88	-0.542	0.45	0.938	1.063	0.029	0.843	1.318	0.26	0.7	0	1.23	1.39	-0.11	0.57	0	1.05	1.3934	0.3019	8.9	0.0598	low similarity	1	0.2578	7.9	0.0563	low similarity	1	0	0	0	no fragment overlap	0	0.3644	15.5	0.0931	low similarity	1
31	50	BENZENE	Cyclohexane	000071-43-2	C6H6	dry/wet	2.35	2.144	2.437	2.077	2.253	1.173	0.598	0.059	0.102	0.674	0.56	0.69	0	0.12	0.72	0.58	0.6	0	0.13	0.7164	0.3858	14.7	0.0092	low similarity	1	0.7874	70.4	0.0024		0	0	0	0	no fragment overlap	0	0.6062	49.6	0.0039		0
161	50	TOLUENE	Cyclohexane	000108-88-3	C7H8	dry/wet	2.99	2.901	3.038	2.887	2.778	1.315	0.606	0.056	0.121	0.802	0.58	0.63	0	0.12	0.86	0.63	0.62	0	0.16	0.8573	0.5953	40.7	0.0035		0	0.8573	81	0.0021		0	0	0	0	no fragment overlap	0	0.7763	79.5	0.0029		0
609	50	ETHOXYBENZENE	Cyclohexane	000103-73-1	C8H10O	dry/wet	2.77	2.52	2.915	2.534	2.727	1.476	0.853	0.057	0.264	0.993	0.62	0.79	0	0.33	1.06	0.66	0.53	0	0.35	1.0569	0.7578	73.2	0.0062		0	0.8226	74.5	0.0015		0	0	0	0	no fragment overlap	0	0.5934	47.9	0.0116		0
79	50	BENZALDEHYDE	Cyclohexane	000100-52-7	C7H6O	dry/wet	1.13	0.817	0.916	0.948	0.87	1.34	0.998	0.06	0.444	0.829	0.81	1.18	0	0.4	0.87	0.86	0.99	0	0.37	0.873	0.6335	47.9	0.0237		0	0.7692	67.7	0.0275		0	0	0	0	no fragment overlap	0	0.5649	44.1	0.0031		0
372	50	ACETOPHENONE	Cyclohexane	000098-86-2	C8H8O	dry/wet	1.27	1.437	1.179	1.551	1.074	1.421	1.037	0.062	0.504	0.953	0.79	1.13	0	0.42	1.01	0.75	1	0	0.5	1.0139	0.7123	64.1	0.0047		0	0.7686	67.6	0.0079		0	0	0	0	no fragment overlap	0	0.5913	47.4	0.0455		0
702	50	BENZOPHENONE	Cyclohexane	000119-61-9	C13H10O	dry/wet	3.29	2.83	2.797	3.5	2.702	2.354	1.351	0.084	0.598	1.381	1.37	1.59	0	0.51	1.48	1.38	1.37	0	0.49	1.4808	0.6884	60.2	0.0145		0	0.3729	16	0.0074	low similarity	1	0	0	0	no fragment overlap	0	0.3229	12.3	0.1418	high leverage low similarity	1
310	50	METHYLBENZOATE	Cyclohexane	000093-58-3	C8H8O2	dry/wet	2.08	1.636	1.837	1.581	1.714	1.421	1.015	0.065	0.437	1.019	0.64	1.03	0	0.45	1.07	0.72	0.97	0	0.46	1.0726	0.7633	74.1	0.0109		0	0.8651	82.1	0.0055		0	0	0	0	no fragment overlap	0	0.6767	63.3	0.0425		0
29	50	BENZONITRILE	Cyclohexane	000100-47-0	C7H5N	dry/wet	1.11	1.466	0.965	1.389	0.955	1.345	1.004	0.09	0.412	0.831	0.73	1.17	0	0.26	0.87	0.8	1.09	0.02	0.27	0.8711	0.5502	32.3	0.0148		0	0.6263	43.2	0.0117		0	0.9039	93.9	0.0182		0	0.5484	41.5	0.0197		0
1024	50	BENZYLCYANIDE	Cyclohexane	000140-29-4	C8H7N	dry/wet	1.31	1.958	0.706	1.915	0.808	1.348	1.196	0.129	0.487	0.957	0.76	1.19	0	0.29	1.01	0.8	1.03	0.05	0.48	1.012	0.5502	32.3	0.0148		0	0.873	83.5	0.0215		0	0.2134	32.2	0.011		0	0.5664	44.4	0.0413		0
17	50	ANILINE	Cyclohexane	000062-53-3	C6H7N	dry/wet	0.05	-0.215	-0.183	-0.076	0.068	1.357	0.985	0.475	0.297	0.762	0.86	1.08	0.23	0.43	0.82	0.94	1.01	0.27	0.35	0.8162	0.6208	45.7	0.011		0	0.6716	49.8	0.0071		0	0	0	0.012	out of domain	2	0.7438	73.9	0.007		0
1168	50	P-METHYLANILINE	Cyclohexane	000106-49-0	C7H9N	dry/wet	0.56	0.54	0.537	0.729	0.677	1.5	0.979	0.44	0.323	0.892	0.88	1.02	0.23	0.43	0.96	0.96	1.03	0.27	0.38	0.9571	0.6645	54.2	0.0091		0	0.6939	53	0.0074		0	0	0	0.012	out of domain	2	0.6953	66.5	0.0078		0
854	50	O-CHLOROANILINE	Cyclohexane	000095-51-2	C6H6ClN	dry/wet	1.17	0.367	1.17	0.621	1.358	1.529	0.88	0.546	0.145	0.884	0.99	1.16	0.23	0.42	0.94	1.04	1.09	0.13	0.33	0.9386	0.6135	44.5	0.013		0	0.8206	74.4	0.0068		0	0	0	0.1135	out of domain structural outlier	2	0.8198	85.5	0.0064		0
855	50	M-CHLOROANILINE	Cyclohexane	000108-42-9	C6H6ClN	dry/wet	0.89	0.363	0.508	0.554	0.826	1.541	0.952	0.686	0.157	0.891	0.99	1.15	0.3	0.37	0.94	1.05	1.09	0.13	0.39	0.9386	0.6245	46.2	0.0138		0	0.8206	74.4	0.0068		0	0	0	0.1458	out of domain structural outlier	2	0.7236	70.4	0.0915		0
856	50	P-CHLOROANILINE	Cyclohexane	000106-47-8	C6H6ClN	dry/wet	0.69	0.135	0.493	0.367	0.818	1.538	0.984	0.654	0.174	0.892	1.01	1.19	0.28	0.42	0.94	1.07	0.98	0.27	0.31	0.9386	0.7505	72	0.0097		0	0.6562	47.4	0.0269		0	0	0	0.012	out of domain	2	0.7859	81.4	0.007		0
857	50	2-NITROANILINE	Cyclohexane	000088-74-4	C6H6N2O2	dry/wet	0.36	0.14	-0.778	0.545	-0.569	1.601	1.082	0.602	0.485	0.932	1.16	1.44	0.18	0.48	0.99	1.17	1.49	0.13	0.47	0.9904	0.8543	91	0.0157		0	0.5068	28.8	0.0097		0	0	0	0.1135	out of domain structural outlier	2	0.6193	52.5	0.0109		0
858	50	3-NITROANILINE	Cyclohexane	000099-09-2	C6H6N2O2	dry/wet	-0.42	-0.9	-1.157	-0.754	-0.77	1.481	1.129	0.781	0.404	0.946	1.13	1.65	0.3	0.53	0.99	1.18	1.49	0.13	0.52	0.9904	0.7728	75.5	0.0163		0	0.5068	28.8	0.0097		0	0	0	0.1458	out of domain structural outlier	2	0.5716	45	0.0963		0
859	50	4-NITROANILINE	Cyclohexane	000100-01-6	C6H6N2O2	dry/wet	-1	-0.851	-2.361	-0.696	-1.844	1.614	1.318	0.843	0.559	0.947	1.13	1.65	0.28	0.53	0.99	1.2	1.62	0.27	0.45	0.9904	0.734	68.5	0.0114		0	0.4809	26.1	0.0786		0	0	0	0.012	out of domain	2	0.6066	49.7	0.0106		0
1264	50	ALPHA-AMINOTOLUENE	Cyclohexane	000100-46-9	C7H9N	dry/wet	-0.12	-0.487	0.87	-0.279	0.773	1.401	0.875	0.257	0.414	0.892	0.78	0.95	0.21	0.66	0.96	0.89	0.8	0.17	0.73	0.9571	0.6361	48.4	0.0149		0	0.9556	97.9	0.0124		0	0.8347	87.5	0.0271		0	0.7798	80.2	0.027		0
2753	50	BENZAMIDE	Cyclohexane	000055-21-0	C7H7NO	dry/wet	-1.92	-2.281	-2.504	-2.334	-2.196	1.399	1.145	0.784	0.624	0.911	1	1.55	0.49	0.66	0.97	1.01	1.15	0.39	0.64	0.9728	0.59	38.8	0.0145		0	0.3085	10.2	0.0053	low similarity	1	0.058	4.5	0.0316	out of domain	2	0.7927	82.4	0.0409		0
833	50	ACETYLAMINOBENZENE	Cyclohexane	000103-84-4	C8H9NO	dry/wet	-1.31	-1.248	-0.413	-1.352	-0.264	1.62	1.167	0.502	0.564	1.043	0.89	1.42	0.41	0.67	1.11	1	1.35	0.49	0.68	1.1137	0.5432	31.7	0.0344		0	0.7694	67.8	0.1037	high leverage	1	0.2639	39.5	0.1739	structural outlier	2	0.5356	39.1	0.0436		0
130	50	2-METHYLPHENOL(O-CRESOL)	Cyclohexane	000095-48-7	C7H8O	dry/wet	-0.04	-0.221	-0.374	-0.234	-0.009	1.333	0.944	0.79	0.198	0.86	0.81	0.84	0.5	0.39	0.92	0.76	0.82	0.41	0.34	0.916	0.6328	47.8	0.0089		0	0.7442	61.7	0.003		0	0	0	0.0044	out of domain	2	0.6375	55.6	0.0031		0
49	50	3-METHYLPHENOL(M-CRESOL)	Cyclohexane	000108-39-4	C7H8O	dry/wet	-0.34	-0.221	-0.535	-0.234	-0.159	1.339	0.971	0.789	0.225	0.862	0.81	0.84	0.5	0.39	0.92	0.77	1.02	0.68	0.32	0.916	0.8215	84.7	0.0094		0	0.7961	71.5	0.0492		0	0.2965	43.9	0.1134	structural outlier	2	0.7551	76.6	0.0034		0
132	50	4-METHYLPHENOL(P-CRESOL)	Cyclohexane	000106-44-5	C7H8O	dry/wet	-0.35	-0.221	-0.48	-0.234	-0.116	1.333	0.96	0.783	0.222	0.863	0.81	0.84	0.5	0.39	0.92	0.82	0.97	0.53	0.32	0.916	0.7117	63.9	0.0265		0	0.8096	73.2	0.0263		0	0.1056	14.3	0.0437	low similarity	1	0.7551	76.6	0.0034		0
277	50	2,3-DIMETHYLPHENOL	Cyclohexane	000526-75-0	C8H10O	dry/wet	0.51	0.541	0.875	0.58	0.971	1.458	0.958	0.47	0.314	0.98	0.83	0.79	0.5	0.39	1.06	0.83	0.83	0.41	0.38	1.0569	0.8556	91	0.0047		0	0.9174	92.6	0.0057		0	0	0	0.0044	out of domain	2	0.8127	84.8	0.0076		0
278	50	2,4-DIMETHYLPHENOL	Cyclohexane	000105-67-9	C8H10O	dry/wet	0.59	0.541	1.023	0.58	1.128	1.471	0.961	0.468	0.293	0.987	0.83	0.79	0.5	0.39	1.06	0.83	0.83	0.41	0.36	1.0569	0.9135	96.9	0.0039		0	0.9174	92.6	0.0057		0	0	0	0.0044	out of domain	2	0.8084	84.6	0.0079		0
1206	50	2,5-DIMETHYLPHENOL	Cyclohexane	000095-87-4	C8H10O	dry/wet	0.57	0.541	0.294	0.58	0.57	1.489	0.95	0.769	0.22	0.988	0.83	0.79	0.5	0.39	1.06	0.83	0.83	0.41	0.36	1.0569	0.9135	96.9	0.0039		0	0.9174	92.6	0.0057		0	0	0	0.0044	out of domain	2	0.8084	84.6	0.0079		0
279	50	2,6-DIMETHYLPHENOL	Cyclohexane	000576-26-1	C8H10O	dry/wet	1	1.24	1.093	1.412	1.133	1.475	0.881	0.489	0.286	0.982	0.83	0.79	0.31	0.39	1.06	0.83	0.83	0.3	0.38	1.0569	0.8556	91	0.0047		0	0.9174	92.6	0.0057		0	0	0	0.1002	out of domain	2	0.8127	84.8	0.0076		0
1207	50	3,4-DIMETHYLPHENOL	Cyclohexane	000095-65-8	C8H10O	dry/wet	0.25	0.541	0.027	0.58	0.304	1.456	0.969	0.772	0.261	0.989	0.83	0.79	0.5	0.39	1.06	0.83	0.83	0.41	0.24	1.0569	0.9135	96.9	0.0039		0	0.9174	92.6	0.0057		0	0	0	0.0044	out of domain	2	0.509	35.2	0.2153	high leverage	1
280	50	3,5-DIMETHYLPHENOL	Cyclohexane	000108-68-9	C8H10O	dry/wet	0.38	0.541	0.121	0.58	0.406	1.478	0.965	0.782	0.242	0.992	0.83	0.79	0.5	0.39	1.06	0.83	0.83	0.57	0.34	1.0569	0.7846	78.5	0.0069		0	0.9174	92.6	0.0057		0	0	0	1	out of domain structural outlier	2	0.7723	78.8	0.0101		0
1564	50	2-ETHYLPHENOL	Cyclohexane	000090-00-6	C8H10O	dry/wet	0.36	0.402	0.465	0.358	0.745	1.437	0.917	0.789	0.174	0.989	0.81	0.85	0.5	0.39	1.06	0.76	0.74	0.41	0.28	1.0569	0.6328	47.8	0.0089		0	0.6749	50.4	0.0024		0	0	0	0.0044	out of domain	2	0.6404	56.1	0.0413		0
1563	50	4-ETHYLPHENOL	Cyclohexane	000123-07-9	C8H10O	dry/wet	0.37	0.402	0.147	0.358	0.43	1.433	0.957	0.78	0.233	0.991	0.81	0.85	0.5	0.39	1.06	0.78	0.89	0.53	0.33	1.0569	0.9246	97.9	0.0332		0	0.9412	96.3	0.0253		0	0.1056	14.3	0.0437	low similarity	1	0.8409	87.7	0.0049		0
810	50	O-CHLOROPHENOL	Cyclohexane	000095-57-8	C6H5ClO	dry/wet	0.87	0.825	1.476	0.949	1.557	1.361	0.828	0.402	0.16	0.859	0.84	0.84	0.33	0.3	0.9	0.87	0.89	0.41	0.27	0.8975	0.7172	65.2	0.0102		0	0.6552	47.3	0.0025		0	0	0	0.0044	out of domain	2	0.5931	47.9	0.0018		0
811	50	M-CHLOROPHENOL	Cyclohexane	000108-43-0	C6H5ClO	dry/wet	-0.12	-0.85	-0.623	-0.948	-0.132	1.371	0.972	0.937	0.139	0.866	0.91	0.97	0.69	0.33	0.9	0.88	1.08	0.68	0.25	0.8975	0.7602	73.8	0.0104		0	0.8541	79.6	0.0485		0	0.2965	43.9	0.1134	structural outlier	2	0.71	68.9	0.0027		0
812	50	P-CHLOROPHENOL	Cyclohexane	000106-48-9	C6H5ClO	dry/wet	-0.35	-1.058	-0.78	-1.11	-0.27	1.361	1.006	0.93	0.163	0.866	0.94	1.01	0.67	0.38	0.9	0.92	0.92	0.53	0.25	0.8975	0.7256	66.6	0.0271		0	0.7361	60.3	0.0452		0	0.1056	14.3	0.0437	low similarity	1	0.71	68.9	0.0027		0
809	50	GUAIACOL	Cyclohexane	000090-05-1	C7H8O2	dry/wet	0.47	0.253	0.771	0.28	0.917	1.346	1.017	0.373	0.316	0.921	0.77	0.96	0.27	0.47	0.97	0.88	0.88	0.41	0.49	0.9747	0.652	51.8	0.0852		0	0.5815	36.9	0.0059		0	0	0	0.0044	out of domain	2	0.8699	90.1	0.0053		0
608	50	3-NITROPHENOL	Cyclohexane	000554-84-7	C6H5NO3	dry/wet	-1.51	-2.119	-2.386	-2.263	-1.702	1.309	1.252	1.042	0.362	0.92	1.05	1.47	0.69	0.49	0.95	1.01	1.48	0.68	0.39	0.9493	0.791	79.8	0.0125		0	0.5722	35.8	0.0515		0	0.2965	43.9	0.1134	structural outlier	2	0.6693	61.1	0.0063		0
619	50	4-NITROPHENOL	Cyclohexane	000100-02-7	C6H5NO3	dry/wet	-2.05	-2.044	-2.854	-2.174	-2.11	1.371	1.323	1.081	0.413	0.92	1.05	1.47	0.67	0.49	0.95	1.06	1.57	0.53	0.39	0.9493	0.6963	61.7	0.0299		0	0.5353	31.6	0.095	high leverage	1	0.1056	14.3	0.0437	low similarity	1	0.6693	61.1	0.0063		0
766	50	1,2-BENZENEDIOL	Cyclohexane	000120-80-9	C6H6O2	dry/wet	-2.66	-2.622	-2.789	-2.703	-2.009	1.206	1.08	1.274	0.192	0.793	0.93	1.08	0.77	0.53	0.83	0.91	1.01	0.82	0.47	0.8338	0.6291	47.1	0.018		0	0.6211	42.2	0.0074		0	0	0	0.0175	out of domain	2	0.6866	64.6	0.005		0
817	50	1,3-BENZENEDIOL	Cyclohexane	000108-46-3	C6H6O2	dry/wet	-3.79	-3.817	-5.01	-3.933	-3.898	1.205	1.259	1.684	0.275	0.798	0.99	1.1	1	0.61	0.83	0.92	1.41	1.36	0.45	0.8338	0.7173	65.2	0.0177		0	0.5819	36.9	0.1928	structural outlier	2	0	0	0.4535	out of domain structural outlier	2	0.6223	53.1	0.0054		0
1642	50	P-HYDROQUINONE	Cyclohexane	000123-31-9	C6H6O2	dry/wet	-4.04	-4.094	-4.887	-4.177	-3.935	1.183	1.211	1.553	0.365	0.801	1.02	1.14	1	0.65	0.83	0.98	1.32	1.06	0.45	0.8338	0.5593	34	0.1052		0	0.5116	29.1	0.1012	high leverage	1	0	0	0.1747	out of domain structural outlier	2	0.6223	53.1	0.0054		0
50026	50	1-Naphthol	Cyclohexane	000090-15-3	C10H8O1	dry/wet	0.58	0.444	0.403	1.264	0.815	2.066	1.131	0.863	0.243	1.081	1.5	1.23	0.5	0.45	1.14	1.46	1.31	0.41	0.35	1.1441	0.7822	78.1	0.0086		0	0.5044	28.4	0.1128	high leverage	1	0	0	0.0044	out of domain	2	0.5005	33.9	0.0048		0
1644	50	2-PHENYLETHANOL	Cyclohexane	000060-12-8	C8H10O	dry/wet	0.01	0.962	-0.77	0.965	-0.633	1.371	1.072	0.57	0.535	0.997	0.78	0.91	0.31	0.4	1.06	0.82	0.85	0.33	0.56	1.0569	0.8946	95.6	0.0055		0	0.7952	71.3	0.0184		0	0.296	43.7	0.034		0	0.6534	58.2	0.0255		0
1051	72	METHANE	Dimethylformamide	000074-82-8	CH4	dry	0.94	0.81	0.956	1.027	0.937	0.516	0.15	0.035	-0.042	0.228	0.11	0.21	0	0.01	0.25	0	0	0	0	0.2495	0	0	0	no fragment overlap	0	0	0	0	no fragment overlap	0	0	0	0	no fragment overlap	0	0	0	0	no fragment overlap	0
41	72	BUTANE	Dimethylformamide	000106-97-8	C4H10	dry	2.6	2.597	2.78	2.505	2.616	0.779	0.118	0.043	-0.063	0.617	0	0.18	0	0.04	0.67	0	0	0	0	0.6722	0	0	0	no fragment overlap	0	0	0	0	no fragment overlap	0	0	0	0	no fragment overlap	0	0	0	0	no fragment overlap	0
316	72	2-METHYLPROPANE	Dimethylformamide	000075-28-5	C4H10	dry	2.67	2.455	2.691	2.342	2.505	0.773	0.127	0.044	-0.043	0.618	0.01	0.17	0	0.06	0.67	0	0	0	0	0.6722	0	0	0	no fragment overlap	0	0	0	0	no fragment overlap	0	0	0	0	no fragment overlap	0	0	0	0	no fragment overlap	0
134	72	PENTANE	Dimethylformamide	000109-66-0	C5H12	dry	3.3	3.216	3.341	3.049	3.11	0.876	0.106	0.049	-0.06	0.747	0	0.19	0	0.04	0.81	0	0	0	0	0.8131	0	0	0	no fragment overlap	0	0	0	0	no fragment overlap	0	0	0	0	no fragment overlap	0	0	0	0	no fragment overlap	0
94	72	2-METHYLBUTANE	Dimethylformamide	000078-78-4	C5H12	dry	3.14	3.074	3.165	2.885	2.913	0.868	0.125	0.049	-0.028	0.741	0.01	0.17	0	0.07	0.81	0	0	0	0	0.8131	0	0	0	no fragment overlap	0	0	0	0	no fragment overlap	0	0	0	0	no fragment overlap	0	0	0	0	no fragment overlap	0
89	72	HEXANE	Dimethylformamide	000110-54-3	C6H14	dry	3.79	3.836	3.884	3.593	3.591	0.98	0.097	0.055	-0.055	0.875	0	0.19	0	0.04	0.95	0	0	0	0	0.954	0	0	0	no fragment overlap	0	0	0	0	no fragment overlap	0	0	0	0	no fragment overlap	0	0	0	0	no fragment overlap	0
370	72	2,2-DIMETHYLBUTANE	Dimethylformamide	000075-83-2	C6H14	dry	3.55	3.644	3.428	3.367	3.033	0.961	0.123	0.058	0.03	0.863	-0.02	0.12	0	0.08	0.95	0	0	0	0	0.954	0	0	0	no fragment overlap	0	0	0	0	no fragment overlap	0	0	0	0	no fragment overlap	0	0	0	0	no fragment overlap	0
91	72	HEPTANE	Dimethylformamide	000142-82-5	C7H16	dry	4.31	4.456	4.417	4.137	4.127	1.105	0.122	0.055	-0.049	1	0	0.2	0	0.05	1.09	0	0	0	0	1.0949	0	0	0	no fragment overlap	0	0	0	0	no fragment overlap	0	0	0	0	no fragment overlap	0	0	0	0	no fragment overlap	0
74	72	2,4-DIMETHYLPENTANE	Dimethylformamide	000108-08-7	C7H16	dry	4.14	4.171	4.075	3.81	3.649	1.061	0.115	0.06	0.017	0.995	0.02	0.16	0	0.1	1.09	0	0	0	0	1.0949	0	0	0	no fragment overlap	0	0	0	0	no fragment overlap	0	0	0	0	no fragment overlap	0	0	0	0	no fragment overlap	0
128	72	OCTANE	Dimethylformamide	000111-65-9	C8H18	dry	4.85	5.075	5.059	4.681	4.744	1.191	0.126	0.058	-0.057	1.135	0	0.2	0	0.05	1.24	0	0	0	0	1.2358	0	0	0	no fragment overlap	0	0	0	0	no fragment overlap	0	0	0	0	no fragment overlap	0	0	0	0	no fragment overlap	0
1283	72	2,5-DIMETHYLHEXANE	Dimethylformamide	000592-13-2	C8H18	dry	4.47	4.79	4.707	4.354	4.282	1.155	0.133	0.062	0.01	1.128	0.02	0.17	0	0.1	1.24	0	0	0	0	1.2358	0	0	0	no fragment overlap	0	0	0	0	no fragment overlap	0	0	0	0	no fragment overlap	0	0	0	0	no fragment overlap	0
398	72	NONANE	Dimethylformamide	000111-84-2	C9H20	dry	5.29	5.69	5.578	5.219	5.272	1.328	0.153	0.058	-0.05	1.258	-0.01	0.2	0	0.05	1.38	0	0	0	0	1.3767	0	0	0	no fragment overlap	0	0	0	0	no fragment overlap	0	0	0	0	no fragment overlap	0	0	0	0	no fragment overlap	0
55	72	METHYLCYCLOPENTANE	Dimethylformamide	000096-37-7	C6H12	dry	3.38	3.339	3.407	3.296	3.225	0.988	0.156	0.043	-0.033	0.789	0.22	0.26	0	0.05	0.85	0.27	0.28	0	0	0.8454	0.7041	62.9	0.0774		0	0.5755	36.4	0.0059		0	0	0	0	no fragment overlap	0	0	0	0	no fragment overlap	0
53	72	METHYLCYCLOHEXANE	Dimethylformamide	000108-87-2	C7H14	dry	3.82	3.959	3.806	3.84	3.572	1.109	0.163	0.043	-0.01	0.904	0.22	0.27	0	0.05	0.99	0.26	0.18	0	0	0.9863	0.6786	58.3	0.003		0	0.5193	29.6	0.0021		0	0	0	0	no fragment overlap	0	0	0	0	no fragment overlap	0
401	72	ETHYLCYCLOHEXANE	Dimethylformamide	001678-91-7	C8H16	dry	4.55	4.578	4.361	4.384	4.1	1.189	0.18	0.044	-0.003	1.035	0.22	0.27	0	0.05	1.13	0.26	0.18	0	0	1.1272	0.6786	58.3	0.003		0	0.5193	29.6	0.0021		0	0	0	0	no fragment overlap	0	0	0	0	no fragment overlap	0
383	72	CYCLOOCTANE	Dimethylformamide	000292-64-8	C8H16	dry	3.85	4.716	4.29	4.541	4.057	1.155	0.207	0.036	0.006	1.027	0.21	0.29	0	0.02	1.13	0.31	0	0	0	1.1272	0.4158	16.9	0.0759	low similarity	1	0	0	0	no fragment overlap	0	0	0	0	no fragment overlap	0	0	0	0	no fragment overlap	0
1053	72	ETHYLENE	Dimethylformamide	000074-85-1	C2H4	dry	1.27	0.98	1.155	1.081	1.296	0.621	0.325	0.044	0.022	0.329	0.1	0.19	0	0.07	0.35	0.12	0.11	0	0.07	0.3474	0.5931	40.1	0.0018		0	0.3517	14.4	0.0009	low similarity	1	0	0	0	no fragment overlap	0	0.6727	62.8	0.002		0
1055	72	PROPYLENE	Dimethylformamide	000115-07-1	C3H6	dry	1.92	1.549	1.684	1.571	1.791	0.74	0.33	0.039	0.029	0.456	0.13	0.24	0	0.08	0.49	0.12	0.11	0	0.07	0.4883	0.5931	40.1	0.0018		0	0.3517	14.4	0.0009	low similarity	1	0	0	0	no fragment overlap	0	0.6727	62.8	0.002		0
368	72	1-BUTENE	Dimethylformamide	000106-98-9	C4H8	dry	2.31	2.168	2.243	2.115	2.291	0.849	0.318	0.041	0.031	0.585	0.13	0.24	0	0.09	0.63	0.12	0.11	0	0.07	0.6292	0.5931	40.1	0.0018		0	0.3517	14.4	0.0009	low similarity	1	0	0	0	no fragment overlap	0	0.6727	62.8	0.002		0
450	72	TRANS-2-BUTENE	Dimethylformamide	000624-64-6	C4H8	dry	2.53	2.122	2.304	2.067	2.347	0.863	0.3	0.041	0.018	0.586	0.16	0.28	0	0.1	0.63	0.16	0.11	0	0.07	0.6292	0.6665	54.7	0.0092		0	0.3517	14.4	0.0009	low similarity	1	0	0	0	no fragment overlap	0	0.6727	62.8	0.002		0
457	72	ISOBUTYLENE	Dimethylformamide	000115-11-7	C4H8	dry	2.31	2.072	2.111	2.001	2.16	0.859	0.34	0.043	0.055	0.58	0.11	0.18	0	0.1	0.63	0.18	0.11	0	0.07	0.6292	0.4198	17.1	0.0718	low similarity	1	0.3517	14.4	0.0009	low similarity	1	0	0	0	no fragment overlap	0	0.6727	62.8	0.002		0
257	72	1-PENTENE	Dimethylformamide	000109-67-1	C5H10	dry	2.93	2.788	2.799	2.659	2.779	0.95	0.307	0.046	0.036	0.716	0.13	0.24	0	0.09	0.77	0.12	0.11	0	0.07	0.7701	0.5931	40.1	0.0018		0	0.3517	14.4	0.0009	low similarity	1	0	0	0	no fragment overlap	0	0.6727	62.8	0.002		0
1995	72	TRANS-2-PENTENE	Dimethylformamide	000646-04-8	C5H10	dry	2.86	2.742	2.842	2.611	2.836	0.985	0.295	0.045	0.023	0.713	0.16	0.29	0	0.1	0.77	0.16	0.11	0	0.07	0.7701	0.6665	54.7	0.0092		0	0.3517	14.4	0.0009	low similarity	1	0	0	0	no fragment overlap	0	0.6727	62.8	0.002		0
356	72	3-METHYL-1-BUTENE	Dimethylformamide	000563-45-1	C5H10	dry	2.87	2.646	2.653	2.496	2.597	0.928	0.311	0.045	0.06	0.709	0.13	0.23	0	0.12	0.77	0.12	0.11	0	0.07	0.7701	0.5931	40.1	0.0018		0	0.3517	14.4	0.0009	low similarity	1	0	0	0	no fragment overlap	0	0.6727	62.8	0.002		0
263	72	2-METHYL-2-BUTENE	Dimethylformamide	000513-35-9	C5H10	dry	2.9	2.646	2.692	2.497	2.681	0.993	0.312	0.049	0.046	0.703	0.14	0.23	0	0.12	0.77	0.17	0.11	0	0.07	0.7701	0.6056	43.2	0.0078		0	0.3517	14.4	0.0009	low similarity	1	0	0	0	no fragment overlap	0	0.6727	62.8	0.002		0
100	72	1-HEXENE	Dimethylformamide	000592-41-6	C6H12	dry	3.37	3.408	3.302	3.203	3.245	1.074	0.311	0.05	0.045	0.839	0.12	0.25	0	0.09	0.91	0.12	0.11	0	0.07	0.911	0.5931	40.1	0.0018		0	0.3517	14.4	0.0009	low similarity	1	0	0	0	no fragment overlap	0	0.6727	62.8	0.002		0
358	72	2-METHYL-2-PENTENE	Dimethylformamide	000625-27-4	C6H12	dry	3.37	3.26	3.228	3.035	3.142	1.089	0.3	0.053	0.054	0.833	0.13	0.23	0	0.12	0.91	0.17	0.11	0	0.07	0.911	0.6056	43.2	0.0078		0	0.3517	14.4	0.0009	low similarity	1	0	0	0	no fragment overlap	0	0.6727	62.8	0.002		0
600	72	1-HEPTENE	Dimethylformamide	000592-76-7	C7H14	dry	3.68	4.027	3.897	3.747	3.82	1.181	0.321	0.052	0.044	0.971	0.12	0.25	0	0.1	1.05	0.12	0.11	0	0.07	1.0519	0.5931	40.1	0.0018		0	0.3517	14.4	0.0009	low similarity	1	0	0	0	no fragment overlap	0	0.6727	62.8	0.002		0
129	72	1-OCTENE	Dimethylformamide	000111-66-0	C8H16	dry	4.26	4.646	4.479	4.292	4.391	1.291	0.334	0.054	0.043	1.1	0.12	0.26	0	0.1	1.19	0.12	0.11	0	0.07	1.1928	0.5931	40.1	0.0018		0	0.3517	14.4	0.0009	low similarity	1	0	0	0	no fragment overlap	0	0.6727	62.8	0.002		0
354	72	1-DECENE	Dimethylformamide	000872-05-9	C10H20	dry	5.39	5.881	5.65	5.374	5.552	1.521	0.367	0.057	0.041	1.359	0.12	0.27	0	0.11	1.47	0.12	0.11	0	0.07	1.4746	0.5931	40.1	0.0018		0	0.3517	14.4	0.0009	low similarity	1	0	0	0	no fragment overlap	0	0.6727	62.8	0.002		0
751	72	1-DODECENE	Dimethylformamide	000112-41-4	C12H24	dry	6.45	7.115	6.822	6.458	6.691	1.745	0.389	0.061	0.04	1.62	0.11	0.27	0	0.11	1.76	0.12	0.11	0	0.07	1.7564	0.5931	40.1	0.0018		0	0.3517	14.4	0.0009	low similarity	1	0	0	0	no fragment overlap	0	0.6727	62.8	0.002		0
364	72	1,3-BUTADIENE	Dimethylformamide	000106-99-0	C4H6	dry	2.13	1.74	1.928	1.726	2.252	1.041	0.495	0.064	0.079	0.554	0.25	0.3	0	0.14	0.59	0.23	0.23	0	0.14	0.5862	0.4203	17.4	0.0071	low similarity	1	0.746	61.9	0.0037		0	0	0	0	no fragment overlap	0	0.7461	74.9	0.0081		0
98	72	2-METHYL-1,3-BUTADIENE	Dimethylformamide	000078-79-5	C5H8	dry	2.61	2.263	2.346	2.156	2.546	1.114	0.473	0.062	0.105	0.678	0.23	0.24	0	0.16	0.73	0.36	0.23	0	0.14	0.7271	0.4882	24.5	0.3453	structural outlier	2	0.746	61.9	0.0037		0	0	0	0	no fragment overlap	0	0.7461	74.9	0.0081		0
2252	72	2,3-DIMETHYL-1,3-BUTADIENE	Dimethylformamide	000513-81-5	C6H10	dry	2.88	2.787	2.821	2.585	2.945	1.188	0.462	0.058	0.116	0.798	0.2	0.19	0	0.18	0.87	0.29	0.23	0	0.14	0.868	0.3887	15	0.0695	low similarity	1	0.746	61.9	0.0037		0	0	0	0	no fragment overlap	0	0.7461	74.9	0.0081		0
968	72	CIS-1,3-PENTADIENE	Dimethylformamide	001574-41-0	C5H8	dry	2.63	2.313	2.347	2.222	2.65	1.204	0.519	0.062	0.105	0.676	0.28	0.34	0	0.15	0.73	0.28	0.23	0	0.14	0.7271	0.6036	42.7	0.0107		0	0.746	61.9	0.0037		0	0	0	0	no fragment overlap	0	0.7461	74.9	0.0081		0
357	72	TRANS-1,3-PENTADIENE	Dimethylformamide	002004-70-8	C5H8	dry	2.59	2.313	2.389	2.222	2.705	1.234	0.514	0.057	0.098	0.679	0.28	0.34	0	0.15	0.73	0.28	0.23	0	0.14	0.7271	0.6036	42.7	0.0107		0	0.746	61.9	0.0037		0	0	0	0	no fragment overlap	0	0.7461	74.9	0.0081		0
823	72	1,4-PENTADIENE	Dimethylformamide	000591-93-5	C5H8	dry	2.61	2.359	2.364	2.27	2.582	1.044	0.497	0.057	0.107	0.682	0.25	0.3	0	0.14	0.73	0.23	0.23	0	0.14	0.7271	0.4203	17.4	0.0071	low similarity	1	0.746	61.9	0.0037		0	0	0	0	no fragment overlap	0	0.7461	74.9	0.0081		0
845	72	1-CYCLOPENTENE	Dimethylformamide	000142-29-0	C5H8	dry	2.56	2.387	2.445	2.476	2.513	0.942	0.321	0.036	0.026	0.626	0.37	0.37	0	0.08	0.66	0.31	0.4	0	0.07	0.6615	0	0	0.0172	out of domain	2	0.6388	45.2	0.0067		0	0	0	0	no fragment overlap	0	0.6727	62.8	0.002		0
846	72	1-CYCLOHEPTENE	Dimethylformamide	000628-92-2	C7H12	dry	3.67	3.621	3.39	3.56	3.37	1.132	0.343	0.027	0.059	0.874	0.36	0.38	0	0.09	0.94	0.43	0.28	0	0.14	0.9433	0.7488	71.9	0.0433		0	0.6778	50.6	0.0244		0	0	0	0	no fragment overlap	0	0.5198	36.8	0.1028		0
2272	72	CYCLOOCTENE	Dimethylformamide	000931-88-4	C8H14	dry	4.1	4.241	3.811	4.104	3.764	1.242	0.366	0.029	0.08	0.99	0.36	0.39	0	0.09	1.08	0.43	0.11	0	0.21	1.0842	0.7273	67.4	0.0866		0	0.3517	14.4	0.0009	low similarity	1	0	0	0	no fragment overlap	0	0.4908	32.5	0.4126	structural outlier	2
314	72	CYCLOPENTADIENE	Dimethylformamide	000542-92-7	C5H6	dry	2.34	1.912	1.947	2.038	2.276	0.99	0.551	0.055	0.114	0.592	0.52	0.47	0	0.14	0.62	0.51	0.51	0	0.14	0.6185	0.4294	18.2	0.0427	low similarity	1	0.57	35.4	0.0094		0	0	0	0	no fragment overlap	0	0.7461	74.9	0.0081		0
1064	72	ETHYNE	Dimethylformamide	000074-86-2	C2H2	dry	1.28	0.873	0.911	1.286	1.295	0.508	0.582	0.226	0.082	0.304	0.36	0.39	0.17	0.07	0.3	0.15	0.24	0.05	0.05	0.3044	0.8229	85	0.0332		0	0.7665	67.2	0.0115		0	0.2134	32.2	0.011		0	0.4484	26.2	0.0202		0
1942	72	PROPYNE	Dimethylformamide	000074-99-7	C3H4	dry	1.48	1.395	1.131	1.572	1.437	0.66	0.581	0.114	0.14	0.427	0.26	0.35	0.09	0.09	0.45	0.15	0.24	0.05	0.12	0.4453	0.8229	85	0.0332		0	0.7665	67.2	0.0115		0	0.2134	32.2	0.011		0	0.8341	87	0.0514		0
1940	72	1-BUTYNE	Dimethylformamide	000107-00-6	C4H6	dry	2.02	2.014	1.69	2.116	1.914	0.773	0.551	0.104	0.14	0.556	0.26	0.36	0.09	0.09	0.59	0.15	0.24	0.05	0.12	0.5862	0.8229	85	0.0332		0	0.7665	67.2	0.0115		0	0.2134	32.2	0.011		0	0.8341	87	0.0514		0
605	72	1-PENTYNE	Dimethylformamide	000627-19-0	C5H8	dry	2.55	2.629	2.25	2.655	2.426	0.882	0.546	0.103	0.143	0.686	0.25	0.36	0.09	0.1	0.73	0.15	0.24	0.05	0.12	0.7271	0.8229	85	0.0332		0	0.7665	67.2	0.0115		0	0.2134	32.2	0.011		0	0.8341	87	0.0514		0
586	72	1-HEXYNE	Dimethylformamide	000693-02-7	C6H10	dry	3.09	3.248	2.825	3.199	2.981	0.989	0.555	0.103	0.143	0.815	0.25	0.36	0.09	0.1	0.87	0.15	0.24	0.05	0.12	0.868	0.8229	85	0.0332		0	0.7665	67.2	0.0115		0	0.2134	32.2	0.011		0	0.8341	87	0.0514		0
587	72	1-HEPTYNE	Dimethylformamide	000628-71-7	C7H12	dry	3.61	3.868	3.399	3.743	3.548	1.1	0.574	0.103	0.145	0.945	0.25	0.37	0.09	0.1	1.01	0.15	0.24	0.05	0.12	1.0089	0.8229	85	0.0332		0	0.7665	67.2	0.0115		0	0.2134	32.2	0.011		0	0.8341	87	0.0514		0
737	72	1-OCTYNE	Dimethylformamide	000629-05-0	C8H14	dry	4.17	4.487	3.982	4.287	4.1	1.208	0.576	0.106	0.144	1.075	0.25	0.37	0.09	0.1	1.15	0.15	0.24	0.05	0.12	1.1498	0.8229	85	0.0332		0	0.7665	67.2	0.0115		0	0.2134	32.2	0.011		0	0.8341	87	0.0514		0
366	72	VINYLACETYLENE	Dimethylformamide	000689-97-4	C4H4	dry	2.46	1.585	1.73	1.727	2.153	0.914	0.617	0.156	0.109	0.524	0.38	0.41	0.09	0.14	0.54	0.27	0.35	0.05	0.2	0.5432	0.4186	17	0.0353	low similarity	1	0.6226	42.5	0.013		0	0.2134	32.2	0.011		0	0.5417	40.2	0.053		0
1158	72	DIFLUOROMETHANE[R32]	Dimethylformamide	000075-10-5	CH2F2	dry	1.01	1.05	0.998	1.116	1.183	0.232	0.496	0.153	0.079	0.329	-0.23	0.09	0.09	0	0.28	-0.2	0.45	0.07	0	0.2849	0.5724	36.2	0.0116		0	0.0806	0.5	0.1478	out of domain	2	0.0044	0.7	0.1674	out of domain structural outlier	2	0	0	0	no fragment overlap	0
1073	72	FLUOROFORM[R23]	Dimethylformamide	000075-46-7	CHF3	dry	1.14	1.128	1.756	1.145	1.749	0.12	0.31	0.224	-0.04	0.376	-0.33	0.05	0.12	0	0.3	-0.3	0	0	0	0.3026	0.7464	71.3	0.026		0	0	0	0	no fragment overlap	0	0	0	0	no fragment overlap	0	0	0	0	no fragment overlap	0
1014	72	TETRAFLUOROMETHANE[R14]	Dimethylformamide	000075-73-0	CF4	dry	1.16	1.148	2.249	0.969	1.784	-0.006	-0.061	0.046	-0.133	0.426	-0.47	-0.03	0	0	0.32	-0.49	-0.42	0	0	0.3203	0.6313	47.7	0.2027	high leverage	1	0.0106	0.1	0.2389	out of domain structural outlier	2	0	0	0	no fragment overlap	0	0	0	0	no fragment overlap	0
1194	72	TRICHLOROFLUOROMETHANE[R11]	Dimethylformamide	000075-69-4	CCl3F	dry	2.3	2.667	2.972	2.721	2.801	0.693	0.173	0.07	-0.042	0.675	0.2	0.41	0	0	0.63	0.24	0.45	0	0	0.6344	0.674	57.2	0.0667		0	0.578	36.6	0.0035		0	0	0	0	no fragment overlap	0	0	0	0	no fragment overlap	0
552	72	DICHLOROFLUOROMETHANE[R21]	Dimethylformamide	000075-43-4	CHCl2F	dry	2.12	2.143	2.352	2.316	2.547	0.581	0.43	0.19	-0.008	0.543	0.11	0.34	0.12	0	0.51	0.16	0.3	0	0	0.512	0.5845	38.1	0.0115		0	0.5926	38.2	0.0015		0	0	0	0	no fragment overlap	0	0	0	0	no fragment overlap	0
446	72	CHLOROTRIFLUOROMETHANE	Dimethylformamide	000075-72-9	CClF3	dry	1.61	1.656	2.424	1.554	1.967	0.221	-0.025	0.066	-0.094	0.506	-0.24	0.12	0	0	0.42	-0.24	0.05	0	0	0.425	0.5076	27.4	0.0703		0	0.5444	32.6	0.0153		0	0	0	0	no fragment overlap	0	0	0	0	no fragment overlap	0
911	72	1,1-DIFLUOROETHANE	Dimethylformamide	000075-37-6	C2H4F2	dry	1.46	1.678	1.333	1.685	1.397	0.307	0.487	0.106	0.125	0.459	-0.22	0.08	0.09	0	0.43	-0.2	0	0	0	0.4258	0.5724	36.2	0.0116		0	0	0	0	no fragment overlap	0	0	0	0	no fragment overlap	0	0	0	0	no fragment overlap	0
1224	72	PENTAFLUOROETHANE	Dimethylformamide	000354-33-6	C2HF5	dry	2.19	1.884	2.732	1.881	2.38	-0.042	0.202	0.247	-0.04	0.598	-0.4	-0.14	0.19	0	0.48	-0.45	0.16	0.08	0	0.4789	0.6465	50.7	0.0291		0	0.5601	34.2	0.0505		0	0.776	83.6	0.0721	high leverage	1	0	0	0	no fragment overlap	0
1418	72	1-CHLORO-1,1-DIFLUOROETHANE	Dimethylformamide	000075-68-3	C2H3ClF2	dry	1.98	2.212	2.271	2.126	2.165	0.424	0.324	0.119	0.041	0.59	-0.13	0.15	0	0	0.55	-0.1	0.15	0	0	0.5482	0.7734	75.6	0.0283		0	0.4394	21.7	0.0004	low similarity	1	0	0	0	no fragment overlap	0	0	0	0	no fragment overlap	0
957	72	2-CHLORO-1,1,1,2-TETRAFLUOROETHANE	Dimethylformamide	002837-89-0	C2HClF4	dry	2.36	2.392	3.079	2.466	2.728	0.169	0.2	0.242	-0.034	0.685	-0.18	0.01	0.19	0	0.58	-0.22	0.31	0.08	0	0.5836	0.5612	34.1	0.0312		0	0.577	36.6	0.0508		0	0.776	83.6	0.0721	high leverage	1	0	0	0	no fragment overlap	0
550	72	CHLOROPENTAFLUOROETHANE[R115]	Dimethylformamide	000076-15-3	C2ClF5	dry	3.24	2.382	3.323	2.218	2.424	0.07	-0.181	0.083	-0.082	0.728	-0.29	-0.08	0	0	0.6	-0.36	0.05	0	0	0.6013	0.6543	52.2	0.0355		0	0.5444	32.6	0.0153		0	0	0	0	no fragment overlap	0	0	0	0	no fragment overlap	0
6811	72	CHLORODIFLUOROETHYLENE	Dimethylformamide	000359-10-4	C2HClF2	dry	1.84	1.878	2.459	1.856	2.361	0.462	0.232	0.125	-0.039	0.552	0.06	0.35	0	0.04	0.51	0.1	0.26	0	0.07	0.5052	0	0	0.021	out of domain	2	0.7031	54.5	0.0013		0	0	0	0	no fragment overlap	0	0.6727	62.8	0.002		0
581	72	METHYLCHLORIDE	Dimethylformamide	000074-87-3	CH3Cl	dry	1.34	1.337	1.094	1.464	1.328	0.573	0.462	0.069	0.079	0.364	0.13	0.31	0	0.03	0.37	0.13	0.15	0	0	0.3719	0.5558	33.3	0.0022		0	0.4394	21.7	0.0004	low similarity	1	0	0	0	no fragment overlap	0	0	0	0	no fragment overlap	0
219	72	TERT-BUTYLCHLORIDE	Dimethylformamide	000507-20-0	C4H9Cl	dry	3.11	3.003	2.333	2.87	2.291	0.89	0.45	0.056	0.17	0.745	0.11	0.26	0	0.07	0.79	0.13	0.15	0	0	0.7946	0.5558	33.3	0.0022		0	0.4394	21.7	0.0004	low similarity	1	0	0	0	no fragment overlap	0	0	0	0	no fragment overlap	0
30856	72	ETHYLBROMIDE	Dimethylformamide	000074-96-4	C2H5Br	dry	1.82	2.202	1.727	2.346	1.961	0.817	0.494	0.055	0.103	0.533	0.31	0.4	0	0.03	0.57	0.34	0.39	0	0.09	0.5654	0.8018	81.2	0.019		0	0.9742	99	0.0263		0	0	0	0	no fragment overlap	0	0.8791	91	0.0371		0
410	72	2-BROMO-2-METHYLPROPANE	Dimethylformamide	000507-19-7	C4H9Br	dry	3.25	3.254	2.501	3.213	2.642	1.045	0.548	0.048	0.175	0.783	0.29	0.34	0	0.07	0.85	0.3	0.25	0	0	0.8472	0.5525	32.9	0.018		0	0.6782	51	0.0086		0	0	0	0	no fragment overlap	0	0	0	0	no fragment overlap	0
580	72	DIMETHYLETHER	Dimethylformamide	000115-10-6	C2H6O	dry	0.16	0.642	0.418	0.4	0.26	0.572	0.432	0.018	0.271	0.428	0.05	0.33	0	0.24	0.45	0	0.28	0	0.24	0.4491	0	0	0	no fragment overlap	0	0.7078	55.3	0.0125		0	0	0	0	no fragment overlap	0	0.2	5	0.014	low similarity	1
12	72	DIETHYLETHER	Dimethylformamide	000060-29-7	C4H10O	dry	0.78	1.881	1.608	1.488	1.272	0.764	0.367	0.029	0.262	0.69	0.04	0.34	0	0.25	0.73	0	0.26	0	0.51	0.7309	0	0	0	no fragment overlap	0	0.7658	66.6	0.0255		0	0	0	0	no fragment overlap	0	0	0	0.3439	out of domain structural outlier	2
338	72	DIPROPYLETHER	Dimethylformamide	000111-43-3	C6H14O	dry	1.75	3.115	2.703	2.57	2.287	0.978	0.366	0.034	0.267	0.942	0.04	0.35	0	0.25	1.01	0	0.18	0	0.34	1.0127	0	0	0	no fragment overlap	0	0.7709	68	0.0121		0	0	0	0	no fragment overlap	0	0.4954	33.1	0.005		0
96	72	DIISOPROPYLETHER	Dimethylformamide	000108-20-3	C6H14O	dry	1.25	2.836	2.416	2.249	1.872	0.939	0.36	0.058	0.325	0.939	0.06	0.31	0	0.31	1.01	0	0	0	0.38	1.0127	0	0	0	no fragment overlap	0	0	0	0	no fragment overlap	0	0	0	0	no fragment overlap	0	0.1435	1.9	0.0183	out of domain	2
822	72	METHYLTERT-BUTYLETHER	Dimethylformamide	001634-04-4	C5H12O	dry	0.88	2.308	1.692	1.806	1.188	0.82	0.393	0.047	0.356	0.808	0.03	0.27	0	0.29	0.87	0	0.14	0	0.22	0.8718	0	0	0	no fragment overlap	0	0.6134	41.2	0.0031		0	0	0	0	no fragment overlap	0	0	0	0.0035	out of domain	2
876	72	METHYLTERT-AMYLETHER	Dimethylformamide	000994-05-8	C6H14O	dry	1.46	2.928	2.14	2.35	1.581	0.912	0.402	0.048	0.376	0.93	0.02	0.28	0	0.29	1.01	0	0.14	0	0.22	1.0127	0	0	0	no fragment overlap	0	0.6134	41.2	0.0031		0	0	0	0	no fragment overlap	0	0	0	0.0035	out of domain	2
1409	72	TERT-BUTYLETHYLETHER	Dimethylformamide	000637-92-3	C6H14O	dry	1.25	2.928	2.351	2.35	1.809	0.932	0.37	0.052	0.335	0.935	0.02	0.28	0	0.29	1.01	0	0.18	0	0.26	1.0127	0	0	0	no fragment overlap	0	0.363	15.2	0.1265	high leverage low similarity	1	0	0	0	no fragment overlap	0	0	0	0.0101	out of domain	2
75	72	1,4-DIOXANE	Dimethylformamide	000123-91-1	C4H8O2	dry	0.02	0.805	0.06	0.332	-0.039	0.729	0.837	0.011	0.592	0.668	0.29	0.58	0	0.44	0.68	0.37	0.53	0	0.68	0.681	0.5033	27	0.0243		0	0.5954	38.4	0.0501		0	0	0	0	no fragment overlap	0	0.1703	3.2	0.0199	out of domain	2
459	72	ISOBUTYRALDEHYDE	Dimethylformamide	000078-84-2	C4H8O	dry	0.9	1.305	0.883	0.853	0.733	0.702	0.598	0.022	0.386	0.645	0.25	0.72	0	0.35	0.69	0.17	0.63	0	0.45	0.6879	0.4992	26	0.0159		0	0.9083	90.7	0.0221		0	0	0	0	no fragment overlap	0	0.6034	49.2	0.2643	structural outlier	2
4	72	ACETONE	Dimethylformamide	000067-64-1	C3H6O	dry	0.12	0.727	-0.13	0.352	-0.22	0.63	0.712	0.046	0.485	0.515	0.22	0.67	0	0.34	0.55	0.12	0.64	0	0.5	0.547	0.5931	40.1	0.0018		0	0.6565	47.5	0.0268		0	0	0	0	no fragment overlap	0	0.334	13	0.0452	low similarity	1
40	72	2-BUTANONE	Dimethylformamide	000078-93-3	C4H8O	dry	0.64	1.346	0.564	0.896	0.396	0.692	0.668	0.033	0.461	0.649	0.21	0.67	0	0.34	0.69	0.12	0.63	0	0.48	0.6879	0.5931	40.1	0.0018		0	0.891	87.7	0.0084		0	0	0	0	no fragment overlap	0	0.4432	25.5	0.0579		0
976	72	2-OCTANONE	Dimethylformamide	000111-13-7	C8H16O	dry	2.46	3.824	2.817	3.072	2.56	1.126	0.705	0.039	0.467	1.16	0.21	0.69	0	0.35	1.25	0.06	0.63	0	0.5	1.2515	0.4997	26.4	0.0795		0	0.891	87.7	0.0084		0	0	0	0	no fragment overlap	0	0.9604	99	0.0156		0
82	72	METHYLACETATE	Dimethylformamide	000079-20-9	C3H6O2	dry	0.56	0.855	0.392	0.337	0.394	0.57	0.757	0.044	0.446	0.585	0.07	0.57	0	0.36	0.61	0.11	0.61	0	0.4	0.6057	0.631	47.6	0.0298		0	0.6969	53.3	0.0096		0	0	0	0	no fragment overlap	0	0.5298	38.1	0.0225		0
21	72	ETHYLACETATE	Dimethylformamide	000141-78-6	C4H8O2	dry	1.02	1.47	0.875	0.875	0.774	0.667	0.735	0.033	0.464	0.716	0.07	0.58	0	0.36	0.75	0.07	0.62	0	0.48	0.7466	0.8503	90.3	0.0205		0	0.7051	54.7	0.0219		0	0	0	0	no fragment overlap	0	0.7374	72.8	0.0319		0
3	72	ACETONITRILE	Dimethylformamide	000075-05-8	C2H3N	dry	0.56	0.762	-0.284	0.582	-0.042	0.504	0.837	0.106	0.417	0.391	0.19	0.72	0	0.2	0.4	0.17	0.56	0.05	0.18	0.4042	0.8597	91.7	0.0113		0	0.2974	9.7	0.0109	low similarity	1	0.2134	32.2	0.011		0	0.4544	26.8	0.0194		0
178	72	METHYLAMINE	Dimethylformamide	000074-89-5	CH5N	dry	-1.39	-1.281	-0.787	-1.605	-1.395	0.571	0.359	0.279	0.435	0.322	0.21	0.49	0.21	0.57	0.35	0.26	0.32	0.27	0.26	0.3493	0.558	33.7	0.0112		0	0.6992	53.5	0.0019		0	0	0	0.012	out of domain	2	0.1311	1.3	0.0062	out of domain	2
179	72	DIMETHYLAMINE	Dimethylformamide	000124-40-3	C2H7N	dry	-1.04	-0.236	0.199	-0.573	-0.335	0.668	0.311	0.179	0.343	0.455	0.16	0.34	0.13	0.47	0.49	0.17	0.32	0.21	0.53	0.4902	0.2386	5.8	0.0025	low similarity	1	0.6992	53.5	0.0019		0	0.0009	0.3	0.3082	out of domain structural outlier	2	0.2127	5.5	0.1791	high leverage low similarity	1
533	72	TRIMETHYLAMINE	Dimethylformamide	000075-50-3	C3H9N	dry	-0.58	0.084	1.091	-0.497	0.66	0.798	0.283	0.066	0.264	0.581	0.17	0.36	0	0.53	0.63	0.17	0.32	0	0.62	0.6311	0.2386	5.8	0.0025	low similarity	1	0.6992	53.5	0.0019		0	0	0	0	no fragment overlap	0	0.3054	11	0.2454	high leverage low similarity	1
72	72	DIMETHYLFORMAMIDE	Dimethylformamide	000068-12-2	C3H7NO	dry	-1.01	-0.083	-0.591	-0.88	-0.778	0.736	0.856	0.041	0.674	0.608	0.35	1.11	0	0.63	0.65	0.34	1.25	0	0.73	0.6468	0.6971	61.8	0.018		0	0.5355	31.7	0.3346	structural outlier	2	0	0	0	no fragment overlap	0	0.4235	22.9	0.026	low similarity	1
110	72	METHANOL	Dimethylformamide	000067-56-1	CH4O	dry	-0.34	-0.146	-0.45	-0.021	-0.77	0.473	0.549	0.586	0.378	0.295	0.21	0.44	0.31	0.3	0.31	0.19	0.28	0.31	0.2	0.3082	0.0194	1.9	0.0022	out of domain	2	0.2446	7.5	0.0017	low similarity	1	0	0	0.0086	out of domain	2	0	0	0.0014	out of domain	2
11	72	ETHANOL	Dimethylformamide	000064-17-5	C2H6O	dry	0.06	0.473	0.042	0.523	-0.377	0.564	0.522	0.562	0.391	0.424	0.21	0.45	0.31	0.31	0.45	0.19	0.37	0.33	0.33	0.4491	0.0194	1.9	0.0022	out of domain	2	0.8374	76.4	0.0078		0	0.296	43.7	0.034		0	0.3233	12.3	0.0151	low similarity	1
140	72	1-PROPANOL	Dimethylformamide	000071-23-8	C3H8O	dry	0.52	1.093	0.55	1.067	0.101	0.643	0.538	0.528	0.406	0.556	0.21	0.45	0.31	0.31	0.59	0.19	0.37	0.33	0.39	0.59	0.0194	1.9	0.0022	out of domain	2	0.8374	76.4	0.0078		0	0.296	43.7	0.034		0	0.3558	14.6	0.0213	low similarity	1
22	72	2-BUTANOL	Dimethylformamide	000078-92-2	C4H10O	dry	0.77	1.57	1.293	1.448	0.852	0.743	0.517	0.503	0.365	0.682	0.21	0.44	0.31	0.34	0.73	0.19	0.28	0.31	0.51	0.7309	0.0194	1.9	0.0022	out of domain	2	0.2446	7.5	0.0017	low similarity	1	0	0	0.0086	out of domain	2	0.7584	77.3	0.0354		0
31	72	BENZENE	Dimethylformamide	000071-43-2	C6H6	dry	2.63	2.553	2.381	2.621	2.816	1.173	0.598	0.059	0.102	0.674	0.56	0.69	0	0.12	0.72	0.58	0.6	0	0.13	0.7164	0.3858	14.7	0.0092	low similarity	1	0.7874	70.4	0.0024		0	0	0	0	no fragment overlap	0	0.6062	49.6	0.0039		0
161	72	TOLUENE	Dimethylformamide	000108-88-3	C7H8	dry	2.99	3.159	2.856	3.194	3.248	1.315	0.606	0.056	0.121	0.802	0.58	0.63	0	0.12	0.86	0.63	0.62	0	0.16	0.8573	0.5953	40.7	0.0035		0	0.8573	81	0.0021		0	0	0	0	no fragment overlap	0	0.7763	79.5	0.0029		0
471	72	BIPHENYL	Dimethylformamide	000092-52-4	C12H10	dry	4.89	4.922	4.195	5.082	5.214	2.339	1.096	0.088	0.267	1.232	1.39	1.16	0	0.21	1.32	1.32	1.07	0	0.27	1.3242	0.5679	35.5	0.0134		0	0.8607	81.2	0.006		0	0	0	0	no fragment overlap	0	0.6182	52.1	0.0119		0
123	72	NAPHTHALENE	Dimethylformamide	000091-20-3	C10H8	dry	4.07	3.995	3.508	4.277	4.403	2.055	0.936	0.077	0.202	1.018	1.27	1.02	0	0.17	1.09	1.28	0.93	0	0.18	1.0854	0.4324	18.5	0.0099	low similarity	1	0.7946	71.1	0.0038		0	0	0	0	no fragment overlap	0	0.6351	55.2	0.007		0
802	72	1,2-DICHLOROBENZENE	Dimethylformamide	000095-50-1	C6H4Cl2	dry	4	3.769	3.567	3.902	4.144	1.507	0.708	0.098	0.098	0.927	0.83	0.85	0	0.1	0.96	0.83	0.76	0	0.07	0.9612	0.6507	51.7	0.0088		0	0.7727	68.2	0.0017		0	0	0	0	no fragment overlap	0	0.6876	64.7	0.0012		0
1183	72	FLUORANTHENE	Dimethylformamide	000206-44-0	C16H10	dry	6.21	5.954	4.913	6.78	6.432	3.527	1.389	0.112	0.37	1.495	2.6	1.52	0	0.25	1.58	2.27	1.53	0	0.32	1.5846	0.1058	2.8	0.3054	out of domain structural outlier	2	0.5354	31.6	0.0121		0	0	0	0	no fragment overlap	0	0.4466	25.9	0.0269		0
6043	72	METHYL-4-DIMETHYLAMINOBENZOATE	Dimethylformamide	001202-25-1	C10H13NO2	dry	3.59	2.744	2.696	1.717	3.22	2.148	1.315	0.075	0.708	1.358	0.88	1.26	0	0.79	1.45	1.03	1.22	0	0.82	1.4542	0.7259	66.7	0.1377	high leverage	1	0.8309	75.4	0.0067		0	0	0	0	no fragment overlap	0	0.5703	45	0.0343		0
6465	72	ACETAMINOPHEN	Dimethylformamide	000103-90-2	C8H9NO2	dry	1.79	1.254	1.917	1.069	1.974	1.657	1.339	1.281	0.732	1.106	1.12	1.66	0.91	0.93	1.17	1.07	1.82	0.91	0.75	1.1724	0.7434	70.8	0.1979	high leverage	1	0.7737	68.4	0.1222	high leverage	1	0.0414	2.8	0.0603	out of domain	2	0.7903	82.1	0.0205		0
41	227	BUTANE	Dimethylacetamide	000106-97-8	C4H10	dry	2.8	2.65	2.985	2.79	2.855	0.779	0.118	0.043	-0.063	0.617	0	0.18	0	0.04	0.67	0	0	0	0	0.6722	0	0	0	no fragment overlap	0	0	0	0	no fragment overlap	0	0	0	0	no fragment overlap	0	0	0	0	no fragment overlap	0
134	227	PENTANE	Dimethylacetamide	000109-66-0	C5H12	dry	3.4	3.278	3.574	3.306	3.35	0.876	0.106	0.049	-0.06	0.747	0	0.19	0	0.04	0.81	0	0	0	0	0.8131	0	0	0	no fragment overlap	0	0	0	0	no fragment overlap	0	0	0	0	no fragment overlap	0	0	0	0	no fragment overlap	0
94	227	2-METHYLBUTANE	Dimethylacetamide	000078-78-4	C5H12	dry	3.2	3.135	3.39	3.072	3.141	0.868	0.125	0.049	-0.028	0.741	0.01	0.17	0	0.07	0.81	0	0	0	0	0.8131	0	0	0	no fragment overlap	0	0	0	0	no fragment overlap	0	0	0	0	no fragment overlap	0	0	0	0	no fragment overlap	0
89	227	HEXANE	Dimethylacetamide	000110-54-3	C6H14	dry	3.92	3.906	4.144	3.823	3.829	0.98	0.097	0.055	-0.055	0.875	0	0.19	0	0.04	0.95	0	0	0	0	0.954	0	0	0	no fragment overlap	0	0	0	0	no fragment overlap	0	0	0	0	no fragment overlap	0	0	0	0	no fragment overlap	0
91	227	HEPTANE	Dimethylacetamide	000142-82-5	C7H16	dry	4.51	4.534	4.7	4.339	4.352	1.105	0.122	0.055	-0.049	1	0	0.2	0	0.05	1.09	0	0	0	0	1.0949	0	0	0	no fragment overlap	0	0	0	0	no fragment overlap	0	0	0	0	no fragment overlap	0	0	0	0	no fragment overlap	0
74	227	2,4-DIMETHYLPENTANE	Dimethylacetamide	000108-08-7	C7H16	dry	4.25	4.249	4.346	3.871	3.864	1.061	0.115	0.06	0.017	0.995	0.02	0.16	0	0.1	1.09	0	0	0	0	1.0949	0	0	0	no fragment overlap	0	0	0	0	no fragment overlap	0	0	0	0	no fragment overlap	0	0	0	0	no fragment overlap	0
128	227	OCTANE	Dimethylacetamide	000111-65-9	C8H18	dry	5	5.163	5.366	4.856	4.972	1.191	0.126	0.058	-0.057	1.135	0	0.2	0	0.05	1.24	0	0	0	0	1.2358	0	0	0	no fragment overlap	0	0	0	0	no fragment overlap	0	0	0	0	no fragment overlap	0	0	0	0	no fragment overlap	0
1283	227	2,5-DIMETHYLHEXANE	Dimethylacetamide	000592-13-2	C8H18	dry	4.6	4.878	5.001	4.387	4.495	1.155	0.133	0.062	0.01	1.128	0.02	0.17	0	0.1	1.24	0	0	0	0	1.2358	0	0	0	no fragment overlap	0	0	0	0	no fragment overlap	0	0	0	0	no fragment overlap	0	0	0	0	no fragment overlap	0
398	227	NONANE	Dimethylacetamide	000111-84-2	C9H20	dry	5.45	5.786	5.908	5.363	5.484	1.328	0.153	0.058	-0.05	1.258	-0.01	0.2	0	0.05	1.38	0	0	0	0	1.3767	0	0	0	no fragment overlap	0	0	0	0	no fragment overlap	0	0	0	0	no fragment overlap	0	0	0	0	no fragment overlap	0
53	227	METHYLCYCLOHEXANE	Dimethylacetamide	000108-87-2	C7H14	dry	3.95	4.051	4.065	4.039	3.764	1.109	0.163	0.043	-0.01	0.904	0.22	0.27	0	0.05	0.99	0.26	0.18	0	0	0.9863	0.6786	58.3	0.003		0	0.5193	29.6	0.0021		0	0	0	0	no fragment overlap	0	0	0	0	no fragment overlap	0
401	227	ETHYLCYCLOHEXANE	Dimethylacetamide	001678-91-7	C8H16	dry	4.66	4.679	4.638	4.556	4.288	1.189	0.18	0.044	-0.003	1.035	0.22	0.27	0	0.05	1.13	0.26	0.18	0	0	1.1272	0.6786	58.3	0.003		0	0.5193	29.6	0.0021		0	0	0	0	no fragment overlap	0	0	0	0	no fragment overlap	0
1053	227	ETHYLENE	Dimethylacetamide	000074-85-1	C2H4	dry	1.27	1.018	1.279	1.335	1.474	0.621	0.325	0.044	0.022	0.329	0.1	0.19	0	0.07	0.35	0.12	0.11	0	0.07	0.3474	0.5931	40.1	0.0018		0	0.3517	14.4	0.0009	low similarity	1	0	0	0	no fragment overlap	0	0.6727	62.8	0.002		0
450	227	TRANS-2-BUTENE	Dimethylacetamide	000624-64-6	C4H8	dry	2.57	2.172	2.482	2.236	2.516	0.863	0.3	0.041	0.018	0.586	0.16	0.28	0	0.1	0.63	0.16	0.11	0	0.07	0.6292	0.6665	54.7	0.0092		0	0.3517	14.4	0.0009	low similarity	1	0	0	0	no fragment overlap	0	0.6727	62.8	0.002		0
257	227	1-PENTENE	Dimethylacetamide	000109-67-1	C5H10	dry	2.95	2.849	2.998	2.814	2.943	0.95	0.307	0.046	0.036	0.716	0.13	0.24	0	0.09	0.77	0.12	0.11	0	0.07	0.7701	0.5931	40.1	0.0018		0	0.3517	14.4	0.0009	low similarity	1	0	0	0	no fragment overlap	0	0.6727	62.8	0.002		0
356	227	3-METHYL-1-BUTENE	Dimethylacetamide	000563-45-1	C5H10	dry	2.9	2.707	2.844	2.58	2.755	0.928	0.311	0.045	0.06	0.709	0.13	0.23	0	0.12	0.77	0.12	0.11	0	0.07	0.7701	0.5931	40.1	0.0018		0	0.3517	14.4	0.0009	low similarity	1	0	0	0	no fragment overlap	0	0.6727	62.8	0.002		0
263	227	2-METHYL-2-BUTENE	Dimethylacetamide	000513-35-9	C5H10	dry	2.91	2.707	2.896	2.581	2.833	0.993	0.312	0.049	0.046	0.703	0.14	0.23	0	0.12	0.77	0.17	0.11	0	0.07	0.7701	0.6056	43.2	0.0078		0	0.3517	14.4	0.0009	low similarity	1	0	0	0	no fragment overlap	0	0.6727	62.8	0.002		0
364	227	1,3-BUTADIENE	Dimethylacetamide	000106-99-0	C4H6	dry	2.33	1.792	2.108	1.805	2.348	1.041	0.495	0.064	0.079	0.554	0.25	0.3	0	0.14	0.59	0.23	0.23	0	0.14	0.5862	0.4203	17.4	0.0071	low similarity	1	0.746	61.9	0.0037		0	0	0	0	no fragment overlap	0	0.7461	74.9	0.0081		0
98	227	2-METHYL-1,3-BUTADIENE	Dimethylacetamide	000078-79-5	C5H8	dry	2.62	2.327	2.542	2.15	2.638	1.114	0.473	0.062	0.105	0.678	0.23	0.24	0	0.16	0.73	0.36	0.23	0	0.14	0.7271	0.4882	24.5	0.3453	structural outlier	2	0.746	61.9	0.0037		0	0	0	0	no fragment overlap	0	0.7461	74.9	0.0081		0
968	227	CIS-1,3-PENTADIENE	Dimethylacetamide	001574-41-0	C5H8	dry	2.65	2.372	2.551	2.259	2.721	1.204	0.519	0.062	0.105	0.676	0.28	0.34	0	0.15	0.73	0.28	0.23	0	0.14	0.7271	0.6036	42.7	0.0107		0	0.746	61.9	0.0037		0	0	0	0	no fragment overlap	0	0.7461	74.9	0.0081		0
357	227	TRANS-1,3-PENTADIENE	Dimethylacetamide	002004-70-8	C5H8	dry	2.61	2.372	2.596	2.259	2.771	1.234	0.514	0.057	0.098	0.679	0.28	0.34	0	0.15	0.73	0.28	0.23	0	0.14	0.7271	0.6036	42.7	0.0107		0	0.746	61.9	0.0037		0	0	0	0	no fragment overlap	0	0.7461	74.9	0.0081		0
47	227	CHLOROFORM	Dimethylacetamide	000067-66-3	CHCl3	dry	3.01	2.752	2.905	3.268	3.24	0.81	0.521	0.172	0.005	0.629	0.34	0.48	0.12	0	0.62	0.39	0.45	0	0	0.6167	0.6073	43.5	0.0197		0	0.578	36.6	0.0035		0	0	0	0	no fragment overlap	0	0	0	0	no fragment overlap	0
157	227	TETRACHLOROMETHANE	Dimethylacetamide	000056-23-5	CCl4	dry	3.37	3.247	3.469	3.745	3.465	0.926	0.298	0.067	-0.016	0.759	0.42	0.55	0	0	0.74	0.52	0.6	0	0	0.7391	0.4857	24.2	0.0349	low similarity	1	0.6167	41.8	0.0062		0	0	0	0	no fragment overlap	0	0	0	0	no fragment overlap	0
219	227	TERT-BUTYLCHLORIDE	Dimethylacetamide	000507-20-0	C4H9Cl	dry	3.07	3.065	2.494	3.073	2.408	0.89	0.45	0.056	0.17	0.745	0.11	0.26	0	0.07	0.79	0.13	0.15	0	0	0.7946	0.5558	33.3	0.0022		0	0.4394	21.7	0.0004	low similarity	1	0	0	0	no fragment overlap	0	0	0	0	no fragment overlap	0
168	227	TRICHLOROETHYLENE	Dimethylacetamide	000079-01-6	C2HCl3	dry	3.2	2.624	3.326	2.851	3.562	1.015	0.447	0.108	-0.014	0.713	0.5	0.64	0	0.11	0.71	0.56	0.56	0	0.07	0.7146	0.6318	47.7	0.0268		0	0.5608	34.3	0.0045		0	0	0	0	no fragment overlap	0	0.6727	62.8	0.002		0
30856	227	ETHYLBROMIDE	Dimethylacetamide	000074-96-4	C2H5Br	dry	1.98	2.264	1.865	2.699	2.081	0.817	0.494	0.055	0.103	0.533	0.31	0.4	0	0.03	0.57	0.34	0.39	0	0.09	0.5654	0.8018	81.2	0.019		0	0.9742	99	0.0263		0	0	0	0	no fragment overlap	0	0.8791	91	0.0371		0
410	227	2-BROMO-2-METHYLPROPANE	Dimethylacetamide	000507-19-7	C4H9Br	dry	3.2	3.334	2.668	3.409	2.718	1.045	0.548	0.048	0.175	0.783	0.29	0.34	0	0.07	0.85	0.3	0.25	0	0	0.8472	0.5525	32.9	0.018		0	0.6782	51	0.0086		0	0	0	0	no fragment overlap	0	0	0	0	no fragment overlap	0
12	227	DIETHYLETHER	Dimethylacetamide	000060-29-7	C4H10O	dry	0.78	1.893	1.73	1.362	1.379	0.764	0.367	0.029	0.262	0.69	0.04	0.34	0	0.25	0.73	0	0.26	0	0.51	0.7309	0	0	0	no fragment overlap	0	0.7658	66.6	0.0255		0	0	0	0	no fragment overlap	0	0	0	0.3439	out of domain structural outlier	2
96	227	DIISOPROPYLETHER	Dimethylacetamide	000108-20-3	C6H14O	dry	1.41	2.865	2.589	1.927	1.97	0.939	0.36	0.058	0.325	0.939	0.06	0.31	0	0.31	1.01	0	0	0	0.38	1.0127	0	0	0	no fragment overlap	0	0	0	0	no fragment overlap	0	0	0	0	no fragment overlap	0	0.1435	1.9	0.0183	out of domain	2
822	227	METHYLTERT-BUTYLETHER	Dimethylacetamide	001634-04-4	C5H12O	dry	0.96	2.331	1.824	1.548	1.273	0.82	0.393	0.047	0.356	0.808	0.03	0.27	0	0.29	0.87	0	0.14	0	0.22	0.8718	0	0	0	no fragment overlap	0	0.6134	41.2	0.0031		0	0	0	0	no fragment overlap	0	0	0	0.0035	out of domain	2
876	227	METHYLTERT-AMYLETHER	Dimethylacetamide	000994-05-8	C6H14O	dry	1.56	2.96	2.29	2.064	1.656	0.912	0.402	0.048	0.376	0.93	0.02	0.28	0	0.29	1.01	0	0.14	0	0.22	1.0127	0	0	0	no fragment overlap	0	0.6134	41.2	0.0031		0	0	0	0	no fragment overlap	0	0	0	0.0035	out of domain	2
1409	227	TERT-BUTYLETHYLETHER	Dimethylacetamide	000637-92-3	C6H14O	dry	1.41	2.96	2.517	2.064	1.901	0.932	0.37	0.052	0.335	0.935	0.02	0.28	0	0.29	1.01	0	0.18	0	0.26	1.0127	0	0	0	no fragment overlap	0	0.363	15.2	0.1265	high leverage low similarity	1	0	0	0	no fragment overlap	0	0	0	0.0101	out of domain	2
75	227	1,4-DIOXANE	Dimethylacetamide	000123-91-1	C4H8O2	dry	-0.04	0.791	0.058	-0.14	-0.107	0.729	0.837	0.011	0.592	0.668	0.29	0.58	0	0.44	0.68	0.37	0.53	0	0.68	0.681	0.5033	27	0.0243		0	0.5954	38.4	0.0501		0	0	0	0	no fragment overlap	0	0.1703	3.2	0.0199	out of domain	2
331	227	FURAN	Dimethylacetamide	000110-00-9	C4H4O	dry	2.07	1.564	1.813	1.688	2.195	0.796	0.647	0.115	0.133	0.536	0.34	0.57	0	0.15	0.54	0.3	0.56	0	0.11	0.5363	0.5707	35.8	0.012		0	0.9153	92.1	0.0075		0	0	0	0	no fragment overlap	0	0.5795	46.1	0.1143		0
1	227	ACETALDEHYDE	Dimethylacetamide	000075-07-0	C2H4O	dry	-0.21	0.159	-0.206	-0.165	-0.141	0.531	0.672	0.038	0.388	0.392	0.24	0.72	0	0.32	0.41	0.17	0.63	0	0.27	0.4061	0.4992	26	0.0159		0	0.9083	90.7	0.0221		0	0	0	0	no fragment overlap	0	0.3319	12.6	0.0019	low similarity	1
459	227	ISOBUTYRALDEHYDE	Dimethylacetamide	000078-84-2	C4H8O	dry	0.86	1.278	0.941	0.641	0.77	0.702	0.598	0.022	0.386	0.645	0.25	0.72	0	0.35	0.69	0.17	0.63	0	0.45	0.6879	0.4992	26	0.0159		0	0.9083	90.7	0.0221		0	0	0	0	no fragment overlap	0	0.6034	49.2	0.2643	structural outlier	2
4	227	ACETONE	Dimethylacetamide	000067-64-1	C3H6O	dry	0.06	0.694	-0.107	0.179	-0.223	0.63	0.712	0.046	0.485	0.515	0.22	0.67	0	0.34	0.55	0.12	0.64	0	0.5	0.547	0.5931	40.1	0.0018		0	0.6565	47.5	0.0268		0	0	0	0	no fragment overlap	0	0.334	13	0.0452	low similarity	1
40	227	2-BUTANONE	Dimethylacetamide	000078-93-3	C4H8O	dry	0.56	1.322	0.608	0.695	0.406	0.692	0.668	0.033	0.461	0.649	0.21	0.67	0	0.34	0.69	0.12	0.63	0	0.48	0.6879	0.5931	40.1	0.0018		0	0.891	87.7	0.0084		0	0	0	0	no fragment overlap	0	0.4432	25.5	0.0579		0
117	227	4-METHYL-2-PENTANONE	Dimethylacetamide	000108-10-1	C6H12O	dry	1.6	2.436	1.754	1.494	1.389	0.896	0.65	0.042	0.463	0.898	0.22	0.67	0	0.37	0.97	0.12	0.63	0	0.39	0.9697	0.5931	40.1	0.0018		0	0.891	87.7	0.0084		0	0	0	0	no fragment overlap	0	0.5731	45.1	0.0115		0
82	227	METHYLACETATE	Dimethylacetamide	000079-20-9	C3H6O2	dry	0.46	0.815	0.41	0.09	0.412	0.57	0.757	0.044	0.446	0.585	0.07	0.57	0	0.36	0.61	0.11	0.61	0	0.4	0.6057	0.631	47.6	0.0298		0	0.6969	53.3	0.0096		0	0	0	0	no fragment overlap	0	0.5298	38.1	0.0225		0
21	227	ETHYLACETATE	Dimethylacetamide	000141-78-6	C4H8O2	dry	0.89	1.438	0.91	0.598	0.783	0.667	0.735	0.033	0.464	0.716	0.07	0.58	0	0.36	0.75	0.07	0.62	0	0.48	0.7466	0.8503	90.3	0.0205		0	0.7051	54.7	0.0219		0	0	0	0	no fragment overlap	0	0.7374	72.8	0.0319		0
80	227	BUTYLACETATE	Dimethylacetamide	000123-86-4	C6H12O2	dry	1.9	2.69	2.225	1.627	1.968	0.85	0.703	0.033	0.437	0.973	0.06	0.59	0	0.37	1.03	0.07	0.57	0	0.46	1.0284	0.8503	90.3	0.0205		0	0.9448	96.5	0.0095		0	0	0	0	no fragment overlap	0	0.8152	85.1	0.0324		0
3	227	ACETONITRILE	Dimethylacetamide	000075-05-8	C2H3N	dry	0.67	0.727	-0.261	0.759	-0.012	0.504	0.837	0.106	0.417	0.391	0.19	0.72	0	0.2	0.4	0.17	0.56	0.05	0.18	0.4042	0.8597	91.7	0.0113		0	0.2974	9.7	0.0109	low similarity	1	0.2134	32.2	0.011		0	0.4544	26.8	0.0194		0
227	227	N,N-DIMETHYLACETAMIDE	Dimethylacetamide	000127-19-5	C4H9NO	dry	-1.08	0.347	-0.301	-1.18	-0.806	0.818	0.818	0.046	0.729	0.732	0.33	1.06	0	0.64	0.79	0.28	0.96	0	0.8	0.7877	0.6656	54.4	0.0032		0	0.3967	17.9	0.0387	low similarity	1	0	0	0	no fragment overlap	0	0.4675	28.8	0.0574		0
110	227	METHANOL	Dimethylacetamide	000067-56-1	CH4O	dry	-0.16	0.013	-0.127	-0.28	-0.504	0.473	0.549	0.586	0.378	0.295	0.21	0.44	0.31	0.3	0.31	0.19	0.28	0.31	0.2	0.3082	0.0194	1.9	0.0022	out of domain	2	0.2446	7.5	0.0017	low similarity	1	0	0	0.0086	out of domain	2	0	0	0.0014	out of domain	2
11	227	ETHANOL	Dimethylacetamide	000064-17-5	C2H6O	dry	0.15	0.641	0.376	0.236	-0.121	0.564	0.522	0.562	0.391	0.424	0.21	0.45	0.31	0.31	0.45	0.19	0.37	0.33	0.33	0.4491	0.0194	1.9	0.0022	out of domain	2	0.8374	76.4	0.0078		0	0.296	43.7	0.034		0	0.3233	12.3	0.0151	low similarity	1
95	227	2-PROPANOL	Dimethylacetamide	000067-63-0	C3H8O	dry	0.4	1.127	0.776	0.518	0.188	0.654	0.524	0.513	0.422	0.554	0.22	0.43	0.31	0.34	0.59	0.19	0.28	0.31	0.42	0.59	0.0194	1.9	0.0022	out of domain	2	0.2446	7.5	0.0017	low similarity	1	0	0	0.0086	out of domain	2	0	0	0.1444	out of domain	2
39	227	1-BUTANOL	Dimethylacetamide	000071-36-3	C4H10O	dry	1.11	1.898	1.482	1.268	0.825	0.75	0.524	0.567	0.409	0.682	0.2	0.46	0.31	0.31	0.73	0.19	0.37	0.36	0.47	0.7309	0.0194	1.9	0.0022	out of domain	2	0.8374	76.4	0.0078		0	0.4208	54.5	0.0196		0	0.9246	94.4	0.0188		0
120	227	2-METHYL-1-PROPANOL	Dimethylacetamide	000078-83-1	C4H10O	dry	1.13	1.755	1.696	1.034	1.144	0.756	0.523	0.552	0.358	0.676	0.21	0.44	0.31	0.34	0.73	0.19	0.37	0.27	0.33	0.7309	0.0194	1.9	0.0022	out of domain	2	0.8374	76.4	0.0078		0	0.6981	79.2	0.0972	high leverage	1	0.3233	12.3	0.0151	low similarity	1
22	227	2-BUTANOL	Dimethylacetamide	000078-92-2	C4H10O	dry	0.93	1.755	1.641	1.034	1.091	0.743	0.517	0.503	0.365	0.682	0.21	0.44	0.31	0.34	0.73	0.19	0.28	0.31	0.51	0.7309	0.0194	1.9	0.0022	out of domain	2	0.2446	7.5	0.0017	low similarity	1	0	0	0.0086	out of domain	2	0.7584	77.3	0.0354		0
14	227	ALLYLALCOHOL	Dimethylacetamide	000107-18-6	C3H6O	dry	-0.25	0.841	0.805	0.259	0.568	0.717	0.707	0.531	0.399	0.522	0.33	0.51	0.31	0.36	0.55	0.31	0.48	0.33	0.4	0.547	0.7297	67.7	0.0038		0	0.9177	92.6	0.0084		0	0.296	43.7	0.034		0	0.349	14.2	0.0169	low similarity	1
31	227	BENZENE	Dimethylacetamide	000071-43-2	C6H6	dry	2.64	2.608	2.568	2.848	2.879	1.173	0.598	0.059	0.102	0.674	0.56	0.69	0	0.12	0.72	0.58	0.6	0	0.13	0.7164	0.3858	14.7	0.0092	low similarity	1	0.7874	70.4	0.0024		0	0	0	0	no fragment overlap	0	0.6062	49.6	0.0039		0
161	227	TOLUENE	Dimethylacetamide	000108-88-3	C7H8	dry	3	3.235	3.067	3.364	3.292	1.315	0.606	0.056	0.121	0.802	0.58	0.63	0	0.12	0.86	0.63	0.62	0	0.16	0.8573	0.5953	40.7	0.0035		0	0.8573	81	0.0021		0	0	0	0	no fragment overlap	0	0.7763	79.5	0.0029		0
25	227	ETHYLBENZENE	Dimethylacetamide	000100-41-4	C8H10	dry	3.42	3.864	3.595	3.881	3.751	1.428	0.614	0.054	0.132	0.928	0.58	0.64	0	0.12	1	0.63	0.48	0	0.17	0.9982	0.5953	40.7	0.0035		0	0.942	96.3	0.011		0	0	0	0	no fragment overlap	0	0.8392	87.5	0.0042		0
927	227	PHENANTHRENE	Dimethylacetamide	000085-01-8	C14H10	dry	5.57	5.642	4.925	5.78	5.513	3.016	1.258	0.111	0.321	1.357	1.99	1.34	0	0.23	1.45	2.07	1.25	0	0.22	1.4544	0.6251	46.3	0.1686	high leverage	1	0.6533	47.1	0.007		0	0	0	0	no fragment overlap	0	0.6043	49.3	0.011		0
1181	227	9H-FLUORENE	Dimethylacetamide	000086-73-7	C13H10	dry	5.15	5.352	4.537	5.496	5.053	2.587	1.163	0.082	0.311	1.279	1.65	1.13	0	0.19	1.36	1.69	1.16	0	0.37	1.3565	0.3057	9.5	0.5967	structural outlier	2	0.6605	48.1	0.0851	high leverage	1	0	0	0	no fragment overlap	0	0.4173	22	0.0204	low similarity	1
1183	227	FLUORANTHENE	Dimethylacetamide	000206-44-0	C16H10	dry	6.26	6.232	5.38	6.53	6.011	3.527	1.389	0.112	0.37	1.495	2.6	1.52	0	0.25	1.58	2.27	1.53	0	0.32	1.5846	0.1058	2.8	0.3054	out of domain structural outlier	2	0.5354	31.6	0.0121		0	0	0	0	no fragment overlap	0	0.4466	25.9	0.0269		0
1653	227	DIBENZOFURAN	Dimethylacetamide	000132-64-9	C12H8O	dry	4.86	4.602	4.404	4.628	4.94	2.486	1.133	0.1	0.285	1.221	1.78	1.22	0	0.27	1.27	1.63	1.71	0	0.07	1.2743	0.1336	3.1	0.2043	out of domain	2	0.6071	40.4	0.2685	structural outlier	2	0	0	0	no fragment overlap	0	0.4022	20.3	0.1831	high leverage low similarity	1
1182	227	CARBAZOLE	Dimethylacetamide	000086-74-8	C12H9N	dry	5.15	4.535	4.921	4.281	5.305	2.717	1.255	0.636	0.307	1.241	1.94	1.43	0.31	0.39	1.32	1.82	1.6	0.46	0.43	1.3154	0.7669	74.7	0.3175	structural outlier	2	0.3942	17.6	0.0102	low similarity	1	0.4449	58.6	0.0729	high leverage	1	0.3837	17.6	0.0088	low similarity	1
1051	4	METHANE	Propanone	000074-82-8	CH4	dry	1.24	1.237	1.533	1.018	1.196	0.516	0.15	0.035	-0.042	0.228	0.11	0.21	0	0.01	0.25	0	0	0	0	0.2495	0	0	0	no fragment overlap	0	0	0	0	no fragment overlap	0	0	0	0	no fragment overlap	0	0	0	0	no fragment overlap	0
316	4	2-METHYLPROPANE	Propanone	000075-28-5	C4H10	dry	3.07	2.642	3.153	2.6	2.93	0.773	0.127	0.044	-0.043	0.618	0.01	0.17	0	0.06	0.67	0	0	0	0	0.6722	0	0	0	no fragment overlap	0	0	0	0	no fragment overlap	0	0	0	0	no fragment overlap	0	0	0	0	no fragment overlap	0
134	4	PENTANE	Propanone	000109-66-0	C5H12	dry	3.68	3.31	3.774	3.387	3.589	0.876	0.106	0.049	-0.06	0.747	0	0.19	0	0.04	0.81	0	0	0	0	0.8131	0	0	0	no fragment overlap	0	0	0	0	no fragment overlap	0	0	0	0	no fragment overlap	0	0	0	0	no fragment overlap	0
468	4	NEOPENTANE	Propanone	000463-82-1	C5H12	dry	3.47	3.147	3.421	3.178	3.131	0.874	0.129	0.052	0.008	0.741	-0.01	0.12	0	0.07	0.81	0	0	0	0	0.8131	0	0	0	no fragment overlap	0	0	0	0	no fragment overlap	0	0	0	0	no fragment overlap	0	0	0	0	no fragment overlap	0
89	4	HEXANE	Propanone	000110-54-3	C6H14	dry	4.22	3.851	4.284	4.006	4.111	0.98	0.097	0.055	-0.055	0.875	0	0.19	0	0.04	0.95	0	0	0	0	0.954	0	0	0	no fragment overlap	0	0	0	0	no fragment overlap	0	0	0	0	no fragment overlap	0	0	0	0	no fragment overlap	0
91	4	HEPTANE	Propanone	000142-82-5	C7H16	dry	4.8	4.391	4.784	4.625	4.665	1.105	0.122	0.055	-0.049	1	0	0.2	0	0.05	1.09	0	0	0	0	1.0949	0	0	0	no fragment overlap	0	0	0	0	no fragment overlap	0	0	0	0	no fragment overlap	0	0	0	0	no fragment overlap	0
128	4	OCTANE	Propanone	000111-65-9	C8H18	dry	5.32	4.932	5.379	5.244	5.339	1.191	0.126	0.058	-0.057	1.135	0	0.2	0	0.05	1.24	0	0	0	0	1.2358	0	0	0	no fragment overlap	0	0	0	0	no fragment overlap	0	0	0	0	no fragment overlap	0	0	0	0	no fragment overlap	0
398	4	NONANE	Propanone	000111-84-2	C9H20	dry	5.81	5.467	5.87	5.857	5.876	1.328	0.153	0.058	-0.05	1.258	-0.01	0.2	0	0.05	1.38	0	0	0	0	1.3767	0	0	0	no fragment overlap	0	0	0	0	no fragment overlap	0	0	0	0	no fragment overlap	0	0	0	0	no fragment overlap	0
74	4	2,4-DIMETHYLPENTANE	Propanone	000108-08-7	C7H16	dry	4.6	4.135	4.435	4.288	4.188	1.061	0.115	0.06	0.017	0.995	0.02	0.16	0	0.1	1.09	0	0	0	0	1.0949	0	0	0	no fragment overlap	0	0	0	0	no fragment overlap	0	0	0	0	no fragment overlap	0	0	0	0	no fragment overlap	0
1283	4	2,5-DIMETHYLHEXANE	Propanone	000592-13-2	C8H18	dry	4.97	4.675	5.019	4.907	4.867	1.155	0.133	0.062	0.01	1.128	0.02	0.17	0	0.1	1.24	0	0	0	0	1.2358	0	0	0	no fragment overlap	0	0	0	0	no fragment overlap	0	0	0	0	no fragment overlap	0	0	0	0	no fragment overlap	0
53	4	METHYLCYCLOHEXANE	Propanone	000108-87-2	C7H14	dry	4.13	4.003	4.224	4.165	4.017	1.109	0.163	0.043	-0.01	0.904	0.22	0.27	0	0.05	0.99	0.26	0.18	0	0	0.9863	0.6786	58.3	0.003		0	0.5193	29.6	0.0021		0	0	0	0	no fragment overlap	0	0	0	0	no fragment overlap	0
401	4	ETHYLCYCLOHEXANE	Propanone	001678-91-7	C8H16	dry	4.9	4.543	4.73	4.784	4.594	1.189	0.18	0.044	-0.003	1.035	0.22	0.27	0	0.05	1.13	0.26	0.18	0	0	1.1272	0.6786	58.3	0.003		0	0.5193	29.6	0.0021		0	0	0	0	no fragment overlap	0	0	0	0	no fragment overlap	0
1053	4	ETHYLENE	Propanone	000074-85-1	C2H4	dry	1.5	1.365	1.633	1.125	1.485	0.621	0.325	0.044	0.022	0.329	0.1	0.19	0	0.07	0.35	0.12	0.11	0	0.07	0.3474	0.5931	40.1	0.0018		0	0.3517	14.4	0.0009	low similarity	1	0	0	0	no fragment overlap	0	0.6727	62.8	0.002		0
457	4	ISOBUTYLENE	Propanone	000115-11-7	C4H8	dry	2.6	2.314	2.539	2.189	2.402	0.859	0.34	0.043	0.055	0.58	0.11	0.18	0	0.1	0.63	0.18	0.11	0	0.07	0.6292	0.4198	17.1	0.0718	low similarity	1	0.3517	14.4	0.0009	low similarity	1	0	0	0	no fragment overlap	0	0.6727	62.8	0.002		0
450	4	TRANS-2-BUTENE	Propanone	000624-64-6	C4H8	dry	2.85	2.338	2.745	2.209	2.618	0.863	0.3	0.041	0.018	0.586	0.16	0.28	0	0.1	0.63	0.16	0.11	0	0.07	0.6292	0.6665	54.7	0.0092		0	0.3517	14.4	0.0009	low similarity	1	0	0	0	no fragment overlap	0	0.6727	62.8	0.002		0
364	4	1,3-BUTADIENE	Propanone	000106-99-0	C4H6	dry	2.46	2.009	2.347	1.797	2.293	1.041	0.495	0.064	0.079	0.554	0.25	0.3	0	0.14	0.59	0.23	0.23	0	0.14	0.5862	0.4203	17.4	0.0071	low similarity	1	0.746	61.9	0.0037		0	0	0	0	no fragment overlap	0	0.7461	74.9	0.0081		0
1064	4	ETHYNE	Propanone	000074-86-2	C2H2	dry	1.34	1.123	1.072	1.021	1.268	0.508	0.582	0.226	0.082	0.304	0.36	0.39	0.17	0.07	0.3	0.15	0.24	0.05	0.05	0.3044	0.8229	85	0.0332		0	0.7665	67.2	0.0115		0	0.2134	32.2	0.011		0	0.4484	26.2	0.0202		0
1942	4	PROPYNE	Propanone	000074-99-7	C3H4	dry	1.47	1.63	1.397	1.496	1.495	0.66	0.581	0.114	0.14	0.427	0.26	0.35	0.09	0.09	0.45	0.15	0.24	0.05	0.12	0.4453	0.8229	85	0.0332		0	0.7665	67.2	0.0115		0	0.2134	32.2	0.011		0	0.8341	87	0.0514		0
1940	4	1-BUTYNE	Propanone	000107-00-6	C4H6	dry	2.2	2.171	1.951	2.115	2.031	0.773	0.551	0.104	0.14	0.556	0.26	0.36	0.09	0.09	0.59	0.15	0.24	0.05	0.12	0.5862	0.8229	85	0.0332		0	0.7665	67.2	0.0115		0	0.2134	32.2	0.011		0	0.8341	87	0.0514		0
366	4	VINYLACETYLENE	Propanone	000689-97-4	C4H4	dry	2.37	1.79	1.976	1.629	2.113	0.914	0.617	0.156	0.109	0.524	0.38	0.41	0.09	0.14	0.54	0.27	0.35	0.05	0.2	0.5432	0.4186	17	0.0353	low similarity	1	0.6226	42.5	0.013		0	0.2134	32.2	0.011		0	0.5417	40.2	0.053		0
581	4	METHYLCHLORIDE	Propanone	000074-87-3	CH3Cl	dry	1.45	1.658	1.453	1.484	1.482	0.573	0.462	0.069	0.079	0.364	0.13	0.31	0	0.03	0.37	0.13	0.15	0	0	0.3719	0.5558	33.3	0.0022		0	0.4394	21.7	0.0004	low similarity	1	0	0	0	no fragment overlap	0	0	0	0	no fragment overlap	0
47	4	CHLOROFORM	Propanone	000067-66-3	CHCl3	dry	2.62	2.696	2.854	2.814	3.187	0.81	0.521	0.172	0.005	0.629	0.34	0.48	0.12	0	0.62	0.39	0.45	0	0	0.6167	0.6073	43.5	0.0197		0	0.578	36.6	0.0035		0	0	0	0	no fragment overlap	0	0	0	0	no fragment overlap	0
157	4	TETRACHLOROMETHANE	Propanone	000056-23-5	CCl4	dry	3.1	3.291	3.593	3.355	3.63	0.926	0.298	0.067	-0.016	0.759	0.42	0.55	0	0	0.74	0.52	0.6	0	0	0.7391	0.4857	24.2	0.0349	low similarity	1	0.6167	41.8	0.0062		0	0	0	0	no fragment overlap	0	0	0	0	no fragment overlap	0
167	4	1,1,1-TRICHLOROETHANE[R140A]	Propanone	000071-55-6	C2H3Cl3	dry	2.96	3.273	3.12	3.335	3.271	0.92	0.469	0.095	0.071	0.754	0.31	0.44	0	0.01	0.76	0.39	0.45	0	0	0.7576	0.6073	43.5	0.0197		0	0.578	36.6	0.0035		0	0	0	0	no fragment overlap	0	0	0	0	no fragment overlap	0
696	4	1,3-DICHLOROPROPANE	Propanone	000142-28-9	C3H6Cl2	dry	2.74	3.24	2.394	3.284	2.957	0.937	0.876	0.112	0.209	0.75	0.25	0.46	0	0.03	0.78	0.4	0.87	0	0.17	0.7761	0.8448	89.1	0.0265		0	0.794	71.1	0.1601	high leverage	1	0	0	0	no fragment overlap	0	0.4023	20.3	0.1678	high leverage low similarity	1
219	4	TERT-BUTYLCHLORIDE	Propanone	000507-20-0	C4H9Cl	dry	3.34	3.117	2.631	3.132	2.56	0.89	0.45	0.056	0.17	0.745	0.11	0.26	0	0.07	0.79	0.13	0.15	0	0	0.7946	0.5558	33.3	0.0022		0	0.4394	21.7	0.0004	low similarity	1	0	0	0	no fragment overlap	0	0	0	0	no fragment overlap	0
1134	4	1,4-DICHLOROBUTANE	Propanone	000110-56-5	C4H8Cl2	dry	3.11	3.781	2.843	3.903	3.407	1.045	0.883	0.076	0.238	0.885	0.25	0.47	0	0.04	0.92	0.4	0.87	0	0.17	0.917	0.8448	89.1	0.0265		0	0.794	71.1	0.1601	high leverage	1	0	0	0	no fragment overlap	0	0.4023	20.3	0.1678	high leverage low similarity	1
410	4	2-BROMO-2-METHYLPROPANE	Propanone	000507-19-7	C4H9Br	dry	3.45	3.369	2.798	3.411	2.824	1.045	0.548	0.048	0.175	0.783	0.29	0.34	0	0.07	0.85	0.3	0.25	0	0	0.8472	0.5525	32.9	0.018		0	0.6782	51	0.0086		0	0	0	0	no fragment overlap	0	0	0	0	no fragment overlap	0
12	4	DIETHYLETHER	Propanone	000060-29-7	C4H10O	dry	1.21	1.988	1.964	1.683	1.594	0.764	0.367	0.029	0.262	0.69	0.04	0.34	0	0.25	0.73	0	0.26	0	0.51	0.7309	0	0	0	no fragment overlap	0	0.7658	66.6	0.0255		0	0	0	0	no fragment overlap	0	0	0	0.3439	out of domain structural outlier	2
75	4	1,4-DIOXANE	Propanone	000123-91-1	C4H8O2	dry	0.01	0.942	0.252	0.301	0.029	0.729	0.837	0.011	0.592	0.668	0.29	0.58	0	0.44	0.68	0.37	0.53	0	0.68	0.681	0.5033	27	0.0243		0	0.5954	38.4	0.0501		0	0	0	0	no fragment overlap	0	0.1703	3.2	0.0199	out of domain	2
4	4	ACETONE	Propanone	000067-64-1	C3H6O	dry	0.25	0.854	0.12	0.272	-0.169	0.63	0.712	0.046	0.485	0.515	0.22	0.67	0	0.34	0.55	0.12	0.64	0	0.5	0.547	0.5931	40.1	0.0018		0	0.6565	47.5	0.0268		0	0	0	0	no fragment overlap	0	0.334	13	0.0452	low similarity	1
40	4	2-BUTANONE	Propanone	000078-93-3	C4H8O	dry	0.7	1.395	0.795	0.891	0.551	0.692	0.668	0.033	0.461	0.649	0.21	0.67	0	0.34	0.69	0.12	0.63	0	0.48	0.6879	0.5931	40.1	0.0018		0	0.891	87.7	0.0084		0	0	0	0	no fragment overlap	0	0.4432	25.5	0.0579		0
82	4	METHYLACETATE	Propanone	000079-20-9	C3H6O2	dry	0.72	0.943	0.559	0.367	0.527	0.57	0.757	0.044	0.446	0.585	0.07	0.57	0	0.36	0.61	0.11	0.61	0	0.4	0.6057	0.631	47.6	0.0298		0	0.6969	53.3	0.0096		0	0	0	0	no fragment overlap	0	0.5298	38.1	0.0225		0
3	4	ACETONITRILE	Propanone	000075-05-8	C2H3N	dry	-0.04	0.916	-0.136	0.449	-0.095	0.504	0.837	0.106	0.417	0.391	0.19	0.72	0	0.2	0.4	0.17	0.56	0.05	0.18	0.4042	0.8597	91.7	0.0113		0	0.2974	9.7	0.0109	low similarity	1	0.2134	32.2	0.011		0	0.4544	26.8	0.0194		0
61	4	DIETHYLAMINE	Propanone	000109-89-7	C4H11N	dry	-0.24	1.012	1.808	0.533	1.112	0.867	0.277	0.165	0.308	0.716	0.15	0.35	0.13	0.48	0.77	0.17	0.32	0.02	0.59	0.772	0.2386	5.8	0.0025	low similarity	1	0.6992	53.5	0.0019		0	0.3635	48.3	0.4003	structural outlier	2	0.3023	10.8	0.0392	low similarity	1
533	4	TRIMETHYLAMINE	Propanone	000075-50-3	C3H9N	dry	-0.47	0.316	1.523	-0.467	0.883	0.798	0.283	0.066	0.264	0.581	0.17	0.36	0	0.53	0.63	0.17	0.32	0	0.62	0.6311	0.2386	5.8	0.0025	low similarity	1	0.6992	53.5	0.0019		0	0	0	0	no fragment overlap	0	0.3054	11	0.2454	high leverage low similarity	1
226	4	METHYLFORMAMIDE	Propanone	000123-39-7	C2H5NO	dry	-0.91	-0.584	-0.817	-1.309	-1.221	0.614	0.837	0.436	0.6	0.481	0.34	1.1	0.26	0.57	0.51	0.34	0.95	0.37	0.67	0.5059	0.6971	61.8	0.018		0	0.5512	33.2	0.0244		0	0.047	3.7	1	out of domain structural outlier	2	0.3333	12.8	0.0469	low similarity	1
110	4	METHANOL	Propanone	000067-56-1	CH4O	dry	-0.71	-0.091	-0.596	-0.392	-1.134	0.473	0.549	0.586	0.378	0.295	0.21	0.44	0.31	0.3	0.31	0.19	0.28	0.31	0.2	0.3082	0.0194	1.9	0.0022	out of domain	2	0.2446	7.5	0.0017	low similarity	1	0	0	0.0086	out of domain	2	0	0	0.0014	out of domain	2
11	4	ETHANOL	Propanone	000064-17-5	C2H6O	dry	-0.43	0.449	-0.103	0.227	-0.664	0.564	0.522	0.562	0.391	0.424	0.21	0.45	0.31	0.31	0.45	0.19	0.37	0.33	0.33	0.4491	0.0194	1.9	0.0022	out of domain	2	0.8374	76.4	0.0078		0	0.296	43.7	0.034		0	0.3233	12.3	0.0151	low similarity	1
1787	4	CYCLOPENTANOL	Propanone	000096-41-3	C5H10O	dry	0.57	1.682	1.067	1.623	0.527	0.841	0.524	0.515	0.422	0.729	0.42	0.53	0.31	0.32	0.76	0.46	0.56	0.31	0.59	0.7632	0.666	54.5	0.0788		0	0.2001	4.3	0.0078	out of domain	2	0	0	0.0086	out of domain	2	0.8535	88.7	0.0234		0
252	4	CYCLOHEXANOL	Propanone	000108-93-0	C6H12O	dry	1.08	2.223	1.381	2.242	0.886	0.96	0.584	0.498	0.463	0.848	0.42	0.53	0.31	0.32	0.9	0.45	0.46	0.31	0.59	0.9041	0.8414	88.6	0.0046		0	0.4289	20.6	0.0035	low similarity	1	0	0	0.0086	out of domain	2	0.8535	88.7	0.0234		0
31	4	BENZENE	Propanone	000071-43-2	C6H6	dry	2.58	2.679	2.743	2.543	2.837	1.173	0.598	0.059	0.102	0.674	0.56	0.69	0	0.12	0.72	0.58	0.6	0	0.13	0.7164	0.3858	14.7	0.0092	low similarity	1	0.7874	70.4	0.0024		0	0	0	0	no fragment overlap	0	0.6062	49.6	0.0039		0
161	4	TOLUENE	Propanone	000108-88-3	C7H8	dry	3	3.245	3.202	3.198	3.286	1.315	0.606	0.056	0.121	0.802	0.58	0.63	0	0.12	0.86	0.63	0.62	0	0.16	0.8573	0.5953	40.7	0.0035		0	0.8573	81	0.0021		0	0	0	0	no fragment overlap	0	0.7763	79.5	0.0029		0
121	4	ALPHA-METHYLSTYRENE	Propanone	000098-83-9	C9H10	dry	3.76	3.869	3.789	3.856	3.988	1.711	0.802	0.073	0.193	1.015	0.68	0.64	0	0.19	1.1	0.78	0.65	0	0.16	1.0961	0.6663	54.5	0.021		0	0.8862	85	0.0025		0	0	0	0	no fragment overlap	0	0.543	40.4	0.0041		0
17	4	ANILINE	Propanone	000062-53-3	C6H7N	dry	1.45	1.485	1.921	1.145	2.164	1.357	0.985	0.475	0.297	0.762	0.86	1.08	0.23	0.43	0.82	0.94	1.01	0.27	0.35	0.8162	0.6208	45.7	0.011		0	0.6716	49.8	0.0071		0	0	0	0.012	out of domain	2	0.7438	73.9	0.007		0
123	4	NAPHTHALENE	Propanone	000091-20-3	C10H8	dry	4.02	4.043	3.847	4.024	4.046	2.055	0.936	0.077	0.202	1.018	1.27	1.02	0	0.17	1.09	1.28	0.93	0	0.18	1.0854	0.4324	18.5	0.0099	low similarity	1	0.7946	71.1	0.0038		0	0	0	0	no fragment overlap	0	0.6351	55.2	0.007		0
927	4	PHENANTHRENE	Propanone	000085-01-8	C14H10	dry	5.46	5.402	4.858	5.498	5.037	3.016	1.258	0.111	0.321	1.357	1.99	1.34	0	0.23	1.45	2.07	1.25	0	0.22	1.4544	0.6251	46.3	0.1686	high leverage	1	0.6533	47.1	0.007		0	0	0	0	no fragment overlap	0	0.6043	49.3	0.011		0
5931	4	METHYL-P-HYDROXYBENZOATE	Propanone	000099-76-3	C8H8O3	dry	2.19	1.067	1.868	0.936	2.246	1.483	1.268	0.978	0.511	1.083	0.87	1.24	0.66	0.72	1.13	0.91	1.33	0.7	0.56	1.1313	0.8287	85.8	0.034		0	0.5546	33.6	0.0292		0	0.6017	71.9	0.1114	structural outlier	2	0.772	78.7	0.0107		0
1051	159	METHANE	Tetrahydrofuran	000074-82-8	CH4	dry	1.28	1.204	1.553	0.7	1.478	0.516	0.15	0.035	-0.042	0.228	0.11	0.21	0	0.01	0.25	0	0	0	0	0.2495	0	0	0	no fragment overlap	0	0	0	0	no fragment overlap	0	0	0	0	no fragment overlap	0	0	0	0	no fragment overlap	0
134	159	PENTANE	Tetrahydrofuran	000109-66-0	C5H12	dry	4.03	3.557	4.098	3.616	3.969	0.876	0.106	0.049	-0.06	0.747	0	0.19	0	0.04	0.81	0	0	0	0	0.8131	0	0	0	no fragment overlap	0	0	0	0	no fragment overlap	0	0	0	0	no fragment overlap	0	0	0	0	no fragment overlap	0
89	159	HEXANE	Tetrahydrofuran	000110-54-3	C6H14	dry	4.66	4.167	4.683	4.363	4.537	0.98	0.097	0.055	-0.055	0.875	0	0.19	0	0.04	0.95	0	0	0	0	0.954	0	0	0	no fragment overlap	0	0	0	0	no fragment overlap	0	0	0	0	no fragment overlap	0	0	0	0	no fragment overlap	0
111	159	2-METHYLPENTANE	Tetrahydrofuran	000107-83-5	C6H14	dry	4.54	4.039	4.479	4.134	4.314	0.973	0.114	0.055	-0.021	0.869	0.01	0.18	0	0.07	0.95	0	0	0	0	0.954	0	0	0	no fragment overlap	0	0	0	0	no fragment overlap	0	0	0	0	no fragment overlap	0	0	0	0	no fragment overlap	0
91	159	HEPTANE	Tetrahydrofuran	000142-82-5	C7H16	dry	5.3	4.776	5.246	5.112	5.106	1.105	0.122	0.055	-0.049	1	0	0.2	0	0.05	1.09	0	0	0	0	1.0949	0	0	0	no fragment overlap	0	0	0	0	no fragment overlap	0	0	0	0	no fragment overlap	0	0	0	0	no fragment overlap	0
74	159	2,4-DIMETHYLPENTANE	Tetrahydrofuran	000108-08-7	C7H16	dry	5.14	4.52	4.883	4.653	4.676	1.061	0.115	0.06	0.017	0.995	0.02	0.16	0	0.1	1.09	0	0	0	0	1.0949	0	0	0	no fragment overlap	0	0	0	0	no fragment overlap	0	0	0	0	no fragment overlap	0	0	0	0	no fragment overlap	0
128	159	OCTANE	Tetrahydrofuran	000111-65-9	C8H18	dry	5.96	5.387	5.916	5.858	5.771	1.191	0.126	0.058	-0.057	1.135	0	0.2	0	0.05	1.24	0	0	0	0	1.2358	0	0	0	no fragment overlap	0	0	0	0	no fragment overlap	0	0	0	0	no fragment overlap	0	0	0	0	no fragment overlap	0
1283	159	2,5-DIMETHYLHEXANE	Tetrahydrofuran	000592-13-2	C8H18	dry	5.55	5.13	5.537	5.401	5.333	1.155	0.133	0.062	0.01	1.128	0.02	0.17	0	0.1	1.24	0	0	0	0	1.2358	0	0	0	no fragment overlap	0	0	0	0	no fragment overlap	0	0	0	0	no fragment overlap	0	0	0	0	no fragment overlap	0
398	159	NONANE	Tetrahydrofuran	000111-84-2	C9H20	dry	6.64	5.992	6.468	6.598	6.332	1.328	0.153	0.058	-0.05	1.258	-0.01	0.2	0	0.05	1.38	0	0	0	0	1.3767	0	0	0	no fragment overlap	0	0	0	0	no fragment overlap	0	0	0	0	no fragment overlap	0	0	0	0	no fragment overlap	0
53	159	METHYLCYCLOHEXANE	Tetrahydrofuran	000108-87-2	C7H14	dry	4.67	4.326	4.615	4.429	4.488	1.109	0.163	0.043	-0.01	0.904	0.22	0.27	0	0.05	0.99	0.26	0.18	0	0	0.9863	0.6786	58.3	0.003		0	0.5193	29.6	0.0021		0	0	0	0	no fragment overlap	0	0	0	0	no fragment overlap	0
401	159	ETHYLCYCLOHEXANE	Tetrahydrofuran	001678-91-7	C8H16	dry	5.5	4.937	5.186	5.176	5.048	1.189	0.18	0.044	-0.003	1.035	0.22	0.27	0	0.05	1.13	0.26	0.18	0	0	1.1272	0.6786	58.3	0.003		0	0.5193	29.6	0.0021		0	0	0	0	no fragment overlap	0	0	0	0	no fragment overlap	0
1053	159	ETHYLENE	Tetrahydrofuran	000074-85-1	C2H4	dry	1.54	1.377	1.655	0.818	1.614	0.621	0.325	0.044	0.022	0.329	0.1	0.19	0	0.07	0.35	0.12	0.11	0	0.07	0.3474	0.5931	40.1	0.0018		0	0.3517	14.4	0.0009	low similarity	1	0	0	0	no fragment overlap	0	0.6727	62.8	0.002		0
1014	159	TETRAFLUOROMETHANE[R14]	Tetrahydrofuran	000075-73-0	CF4	dry	1.55	1.468	2.768	1.306	2.502	-0.006	-0.061	0.046	-0.133	0.426	-0.47	-0.03	0	0	0.32	-0.49	-0.42	0	0	0.3203	0.6313	47.7	0.2027	high leverage	1	0.0106	0.1	0.2389	out of domain structural outlier	2	0	0	0	no fragment overlap	0	0	0	0	no fragment overlap	0
47	159	CHLOROFORM	Tetrahydrofuran	000067-66-3	CHCl3	dry	2.97	2.833	3.036	3.021	3.069	0.81	0.521	0.172	0.005	0.629	0.34	0.48	0.12	0	0.62	0.39	0.45	0	0	0.6167	0.6073	43.5	0.0197		0	0.578	36.6	0.0035		0	0	0	0	no fragment overlap	0	0	0	0	no fragment overlap	0
157	159	TETRACHLOROMETHANE	Tetrahydrofuran	000056-23-5	CCl4	dry	3.47	3.434	3.873	3.586	3.813	0.926	0.298	0.067	-0.016	0.759	0.42	0.55	0	0	0.74	0.52	0.6	0	0	0.7391	0.4857	24.2	0.0349	low similarity	1	0.6167	41.8	0.0062		0	0	0	0	no fragment overlap	0	0	0	0	no fragment overlap	0
167	159	1,1,1-TRICHLOROETHANE[R140A]	Tetrahydrofuran	000071-55-6	C2H3Cl3	dry	3.05	3.447	3.346	3.542	3.299	0.92	0.469	0.095	0.071	0.754	0.31	0.44	0	0.01	0.76	0.39	0.45	0	0	0.7576	0.6073	43.5	0.0197		0	0.578	36.6	0.0035		0	0	0	0	no fragment overlap	0	0	0	0	no fragment overlap	0
219	159	TERT-BUTYLCHLORIDE	Tetrahydrofuran	000507-20-0	C4H9Cl	dry	3.3	3.336	2.823	3.287	2.683	0.89	0.45	0.056	0.17	0.745	0.11	0.26	0	0.07	0.79	0.13	0.15	0	0	0.7946	0.5558	33.3	0.0022		0	0.4394	21.7	0.0004	low similarity	1	0	0	0	no fragment overlap	0	0	0	0	no fragment overlap	0
164	159	1,1,2,2-TETRACHLOROETHYLENE	Tetrahydrofuran	000127-18-4	C2Cl4	dry	4.05	3.262	4.292	3.244	4.31	1.175	0.375	0.051	-0.018	0.836	0.6	0.73	0	0.12	0.84	0.63	0.71	0	0.01	0.837	0.6564	53	0.0354		0	0.5269	30.7	0.0072		0	0	0	0	no fragment overlap	0	0.5888	47.2	0.4152	structural outlier	2
410	159	2-BROMO-2-METHYLPROPANE	Tetrahydrofuran	000507-19-7	C4H9Br	dry	3.44	3.604	2.988	3.538	2.92	1.045	0.548	0.048	0.175	0.783	0.29	0.34	0	0.07	0.85	0.3	0.25	0	0	0.8472	0.5525	32.9	0.018		0	0.6782	51	0.0086		0	0	0	0	no fragment overlap	0	0	0	0	no fragment overlap	0
220	159	1,1,2-TRICHLORO-1,2,2-TRIFLUOROETHANE[R113]	Tetrahydrofuran	000076-13-1	C2Cl3F3	dry	3.77	3.54	4.421	3.55	4.125	0.51	0.072	0.092	-0.02	0.894	0.2	0.31	0	0.04	0.81	0.11	0.23	0	0	0.8107	0.6785	58.2	0.0924		0	0.4671	24.4	0.0285	low similarity	1	0	0	0	no fragment overlap	0	0	0	0	no fragment overlap	0
1946	159	1,2-DIFLUORO-1,1,2,2-TETRACHLOROETHANE	Tetrahydrofuran	000076-12-0	C2Cl4F2	dry	4.17	3.87	4.653	3.873	4.451	0.806	0.213	0.086	0.011	0.968	0.42	0.45	0	0.08	0.92	0.38	0.16	0	0	0.9154	0.7581	73.3	0.1883	high leverage	1	0.453	23.2	0.1116	high leverage low similarity	1	0	0	0	no fragment overlap	0	0	0	0	no fragment overlap	0
12	159	DIETHYLETHER	Tetrahydrofuran	000060-29-7	C4H10O	dry	1.4	2.118	2.116	1.708	1.846	0.764	0.367	0.029	0.262	0.69	0.04	0.34	0	0.25	0.73	0	0.26	0	0.51	0.7309	0	0	0	no fragment overlap	0	0.7658	66.6	0.0255		0	0	0	0	no fragment overlap	0	0	0	0.3439	out of domain structural outlier	2
399	159	PROPANAL	Tetrahydrofuran	000123-38-6	C3H6O	dry	0.28	0.859	0.586	0.386	0.356	0.605	0.633	0.025	0.386	0.52	0.24	0.73	0	0.32	0.55	0.17	0.63	0	0.46	0.547	0.4992	26	0.0159		0	0.9083	90.7	0.0221		0	0	0	0	no fragment overlap	0	0.9763	100	0.1445	high leverage	1
313	159	BUTANAL	Tetrahydrofuran	000123-72-8	C4H8O	dry	0.91	1.469	1.15	1.133	0.914	0.714	0.641	0.025	0.391	0.644	0.24	0.73	0	0.32	0.69	0.17	0.63	0	0.46	0.6879	0.4992	26	0.0159		0	0.9083	90.7	0.0221		0	0	0	0	no fragment overlap	0	0.9763	100	0.1445	high leverage	1
4	159	ACETONE	Tetrahydrofuran	000067-64-1	C3H6O	dry	0.06	0.795	0.049	0.229	-0.219	0.63	0.712	0.046	0.485	0.515	0.22	0.67	0	0.34	0.55	0.12	0.64	0	0.5	0.547	0.5931	40.1	0.0018		0	0.6565	47.5	0.0268		0	0	0	0	no fragment overlap	0	0.334	13	0.0452	low similarity	1
40	159	2-BUTANONE	Tetrahydrofuran	000078-93-3	C4H8O	dry	0.61	1.405	0.806	0.976	0.52	0.692	0.668	0.033	0.461	0.649	0.21	0.67	0	0.34	0.69	0.12	0.63	0	0.48	0.6879	0.5931	40.1	0.0018		0	0.891	87.7	0.0084		0	0	0	0	no fragment overlap	0	0.4432	25.5	0.0579		0
21	159	ETHYLACETATE	Tetrahydrofuran	000141-78-6	C4H8O2	dry	1.18	1.531	1.054	1.116	0.779	0.667	0.735	0.033	0.464	0.716	0.07	0.58	0	0.36	0.75	0.07	0.62	0	0.48	0.7466	0.8503	90.3	0.0205		0	0.7051	54.7	0.0219		0	0	0	0	no fragment overlap	0	0.7374	72.8	0.0319		0
400	159	METHYLPROPIONATE	Tetrahydrofuran	000554-12-1	C4H8O2	dry	1.11	1.531	1.011	1.116	0.729	0.653	0.734	0.033	0.469	0.713	0.07	0.58	0	0.36	0.75	0.09	0.6	0	0.44	0.7466	0.4929	25.2	0.0079		0	0.9361	95.5	0.0047		0	0	0	0	no fragment overlap	0	0.4969	33.4	0.0519		0
3	159	ACETONITRILE	Tetrahydrofuran	000075-05-8	C2H3N	dry	0.3	0.794	-0.277	0.526	-0.427	0.504	0.837	0.106	0.417	0.391	0.19	0.72	0	0.2	0.4	0.17	0.56	0.05	0.18	0.4042	0.8597	91.7	0.0113		0	0.2974	9.7	0.0109	low similarity	1	0.2134	32.2	0.011		0	0.4544	26.8	0.0194		0
72	159	DIMETHYLFORMAMIDE	Tetrahydrofuran	000068-12-2	C3H7NO	dry	-1.34	-0.303	-0.486	-1.089	-0.835	0.736	0.856	0.041	0.674	0.608	0.35	1.11	0	0.63	0.65	0.34	1.25	0	0.73	0.6468	0.6971	61.8	0.018		0	0.5355	31.7	0.3346	structural outlier	2	0	0	0	no fragment overlap	0	0.4235	22.9	0.026	low similarity	1
110	159	METHANOL	Tetrahydrofuran	000067-56-1	CH4O	dry	-0.9	-0.087	-0.524	-0.617	-0.825	0.473	0.549	0.586	0.378	0.295	0.21	0.44	0.31	0.3	0.31	0.19	0.28	0.31	0.2	0.3082	0.0194	1.9	0.0022	out of domain	2	0.2446	7.5	0.0017	low similarity	1	0	0	0.0086	out of domain	2	0	0	0.0014	out of domain	2
11	159	ETHANOL	Tetrahydrofuran	000064-17-5	C2H6O	dry	-0.33	0.523	0.036	0.131	-0.298	0.564	0.522	0.562	0.391	0.424	0.21	0.45	0.31	0.31	0.45	0.19	0.37	0.33	0.33	0.4491	0.0194	1.9	0.0022	out of domain	2	0.8374	76.4	0.0078		0	0.296	43.7	0.034		0	0.3233	12.3	0.0151	low similarity	1
140	159	1-PROPANOL	Tetrahydrofuran	000071-23-8	C3H8O	dry	0.24	1.132	0.58	0.879	0.232	0.643	0.538	0.528	0.406	0.556	0.21	0.45	0.31	0.31	0.59	0.19	0.37	0.33	0.39	0.59	0.0194	1.9	0.0022	out of domain	2	0.8374	76.4	0.0078		0	0.296	43.7	0.034		0	0.3558	14.6	0.0213	low similarity	1
95	159	2-PROPANOL	Tetrahydrofuran	000067-63-0	C3H8O	dry	-0.04	1.004	0.505	0.65	0.141	0.654	0.524	0.513	0.422	0.554	0.22	0.43	0.31	0.34	0.59	0.19	0.28	0.31	0.42	0.59	0.0194	1.9	0.0022	out of domain	2	0.2446	7.5	0.0017	low similarity	1	0	0	0.0086	out of domain	2	0	0	0.1444	out of domain	2
31	159	BENZENE	Tetrahydrofuran	000071-43-2	C6H6	dry	2.85	2.759	2.889	2.644	2.959	1.173	0.598	0.059	0.102	0.674	0.56	0.69	0	0.12	0.72	0.58	0.6	0	0.13	0.7164	0.3858	14.7	0.0092	low similarity	1	0.7874	70.4	0.0024		0	0	0	0	no fragment overlap	0	0.6062	49.6	0.0039		0
161	159	TOLUENE	Tetrahydrofuran	000108-88-3	C7H8	dry	3.34	3.413	3.415	3.339	3.474	1.315	0.606	0.056	0.121	0.802	0.58	0.63	0	0.12	0.86	0.63	0.62	0	0.16	0.8573	0.5953	40.7	0.0035		0	0.8573	81	0.0021		0	0	0	0	no fragment overlap	0	0.7763	79.5	0.0029		0
25	159	ETHYLBENZENE	Tetrahydrofuran	000100-41-4	C8H10	dry	3.85	4.023	3.96	4.087	4.009	1.428	0.614	0.054	0.132	0.928	0.58	0.64	0	0.12	1	0.63	0.48	0	0.17	0.9982	0.5953	40.7	0.0035		0	0.942	96.3	0.011		0	0	0	0	no fragment overlap	0	0.8392	87.5	0.0042		0
369	159	PROPYLBENZENE	Tetrahydrofuran	000103-65-1	C9H12	dry	4.48	4.633	4.54	4.834	4.587	1.552	0.623	0.052	0.136	1.053	0.58	0.64	0	0.12	1.14	0.63	0.48	0	0.17	1.1391	0.5953	40.7	0.0035		0	0.942	96.3	0.011		0	0	0	0	no fragment overlap	0	0.8392	87.5	0.0042		0
763	159	TERT-BUTYLBENZENE	Tetrahydrofuran	000098-06-6	C10H14	dry	4.77	5.09	4.661	5.271	4.65	1.651	0.653	0.062	0.217	1.165	0.56	0.58	0	0.16	1.28	0.61	0.56	0	0.18	1.28	0.6677	54.8	0.0108		0	0.7188	57.2	0.0234		0	0	0	0	no fragment overlap	0	0.5914	47.4	0.0204		0
123	159	NAPHTHALENE	Tetrahydrofuran	000091-20-3	C10H8	dry	4.29	4.254	4.117	4.092	4.384	2.055	0.936	0.077	0.202	1.018	1.27	1.02	0	0.17	1.09	1.28	0.93	0	0.18	1.0854	0.4324	18.5	0.0099	low similarity	1	0.7946	71.1	0.0038		0	0	0	0	no fragment overlap	0	0.6351	55.2	0.007		0
1169	159	ACENAPHTHYLENE-1,2-DIHYDRO	Tetrahydrofuran	000083-32-9	C12H10	dry	4.87	5.244	4.758	5.035	5.02	2.33	0.96	0.055	0.247	1.19	1.53	0.99	0	0.15	1.26	1.58	1.07	0	0.27	1.2586	0.6334	47.9	0.1371	high leverage	1	0.6768	50.5	0.0085		0	0	0	0	no fragment overlap	0	0.7471	75.1	0.0146		0
927	159	PHENANTHRENE	Tetrahydrofuran	000085-01-8	C14H10	dry	5.62	5.744	5.26	5.533	5.716	3.016	1.258	0.111	0.321	1.357	1.99	1.34	0	0.23	1.45	2.07	1.25	0	0.22	1.4544	0.6251	46.3	0.1686	high leverage	1	0.6533	47.1	0.007		0	0	0	0	no fragment overlap	0	0.6043	49.3	0.011		0
2822	159	HEXACHLOROBENZENE	Tetrahydrofuran	000118-74-1	C6Cl6	dry	6.54	6.671	6.206	7.53	6.355	2.337	0.714	0.053	0.171	1.409	1.33	1.23	0	0	1.45	1.42	1.08	0	0	1.4508	0.4172	17	0.0278	low similarity	1	0.4378	21.5	0.0112	low similarity	1	0	0	0	no fragment overlap	0	0	0	0	no fragment overlap	0
5441	159	MONURON	Tetrahydrofuran	000150-68-5	C9H11ClN2O	dry	2.44	2.366	3.409	2.25	3.438	2.143	1.361	0.419	0.63	1.382	1.16	1.59	0.37	0.84	1.48	1.29	1.5	0.38	0.84	1.4768	0.7036	62.8	0.0547		0	0.638	45.1	0.0507		0	0.0686	5.8	0.0165	low similarity	1	0.7017	67.8	0.0455		0
6465	159	ACETAMINOPHEN	Tetrahydrofuran	000103-90-2	C8H9NO2	dry	0.91	0.377	1.303	0.635	1.106	1.657	1.339	1.281	0.732	1.106	1.12	1.66	0.91	0.93	1.17	1.07	1.82	0.91	0.75	1.1724	0.7434	70.8	0.1979	high leverage	1	0.7737	68.4	0.1222	high leverage	1	0.0414	2.8	0.0603	out of domain	2	0.7903	82.1	0.0205		0
5972	159	DIPHENYL-SULFONE	Tetrahydrofuran	000127-63-9	C12H10O2S	dry	3.52	3.383	3.348	3.531	3.399	2.327	1.549	0.124	0.769	1.508	1.26	2.01	0	0.74	1.61	1.49	2.02	0	0.77	1.6051	0.4724	23.2	0.0293	low similarity	1	0.4865	26.6	0.0247		0	0	0	0	no fragment overlap	0	0.6377	55.7	0.0197		0
40086	159	Trimethoprim	Tetrahydrofuran	000738-70-5	C14H18N4O3	dry	1.018	1.45	1.52	0.828	0.97	2.863	1.918	0.915	1.604	2.053	2.04	2.81	0.45	1.62	2.18	2.14	2.62	0.55	1.74	2.1813	0.6533	52.1	0.0715		0	0.4964	27.6	0.1831	structural outlier	2	0	0	0.048	out of domain	2	0.3959	19.8	0.0772	low similarity	1
5954	159	PHENACETIN	Tetrahydrofuran	000062-44-2	C10H13NO2	dry	2.02	2.016	2.599	1.982	2.487	2.007	1.37	0.497	0.765	1.366	0.96	1.55	0.41	0.87	1.45	0.93	1.4	0.38	0.8	1.4542	0.8758	94.1	0.1723	high leverage	1	0.7026	54.5	0.1019	high leverage	1	0.0686	5.8	0.0165	low similarity	1	0.7315	71.7	0.0291		0
57	159	DIBUTYLETHER	Tetrahydrofuran	000142-96-1	C8H18O	dry	3.802	4.552	4.519	4.691	4.23	1.189	0.394	0.035	0.266	1.202	0.04	0.35	0	0.26	1.29	0	0.18	0	0.41	1.2945	0	0	0	no fragment overlap	0	0.7709	68	0.0121		0	0	0	0	no fragment overlap	0	0.7666	78.4	0.0424		0
859	159	4-NITROANILINE	Tetrahydrofuran	000100-01-6	C6H6N2O2	dry	2.689	1.715	1.545	1.891	1.555	1.614	1.318	0.843	0.559	0.947	1.13	1.65	0.28	0.53	0.99	1.2	1.62	0.27	0.45	0.9904	0.734	68.5	0.0114		0	0.4809	26.1	0.0786		0	0	0	0.012	out of domain	2	0.6066	49.7	0.0106		0
1051	75	METHANE	Dioxane	000074-82-8	CH4	dry	1.06	1.091	1.401	0.929	1.127	0.516	0.15	0.035	-0.042	0.228	0.11	0.21	0	0.01	0.25	0	0	0	0	0.2495	0	0	0	no fragment overlap	0	0	0	0	no fragment overlap	0	0	0	0	no fragment overlap	0	0	0	0	no fragment overlap	0
134	75	PENTANE	Dioxane	000109-66-0	C5H12	dry	3.59	3.286	3.775	3.36	3.552	0.876	0.106	0.049	-0.06	0.747	0	0.19	0	0.04	0.81	0	0	0	0	0.8131	0	0	0	no fragment overlap	0	0	0	0	no fragment overlap	0	0	0	0	no fragment overlap	0	0	0	0	no fragment overlap	0
468	75	NEOPENTANE	Dioxane	000463-82-1	C5H12	dry	3.42	3.118	3.417	3.059	3.113	0.874	0.129	0.052	0.008	0.741	-0.01	0.12	0	0.07	0.81	0	0	0	0	0.8131	0	0	0	no fragment overlap	0	0	0	0	no fragment overlap	0	0	0	0	no fragment overlap	0	0	0	0	no fragment overlap	0
89	75	HEXANE	Dioxane	000110-54-3	C6H14	dry	4.15	3.859	4.318	3.993	4.09	0.98	0.097	0.055	-0.055	0.875	0	0.19	0	0.04	0.95	0	0	0	0	0.954	0	0	0	no fragment overlap	0	0	0	0	no fragment overlap	0	0	0	0	no fragment overlap	0	0	0	0	no fragment overlap	0
91	75	HEPTANE	Dioxane	000142-82-5	C7H16	dry	4.75	4.432	4.853	4.628	4.663	1.105	0.122	0.055	-0.049	1	0	0.2	0	0.05	1.09	0	0	0	0	1.0949	0	0	0	no fragment overlap	0	0	0	0	no fragment overlap	0	0	0	0	no fragment overlap	0	0	0	0	no fragment overlap	0
74	75	2,4-DIMETHYLPENTANE	Dioxane	000108-08-7	C7H16	dry	4.56	4.171	4.496	4.201	4.194	1.061	0.115	0.06	0.017	0.995	0.02	0.16	0	0.1	1.09	0	0	0	0	1.0949	0	0	0	no fragment overlap	0	0	0	0	no fragment overlap	0	0	0	0	no fragment overlap	0	0	0	0	no fragment overlap	0
128	75	OCTANE	Dioxane	000111-65-9	C8H18	dry	5.35	5.005	5.482	5.261	5.338	1.191	0.126	0.058	-0.057	1.135	0	0.2	0	0.05	1.24	0	0	0	0	1.2358	0	0	0	no fragment overlap	0	0	0	0	no fragment overlap	0	0	0	0	no fragment overlap	0	0	0	0	no fragment overlap	0
1283	75	2,5-DIMETHYLHEXANE	Dioxane	000592-13-2	C8H18	dry	4.94	4.744	5.114	4.834	4.874	1.155	0.133	0.062	0.01	1.128	0.02	0.17	0	0.1	1.24	0	0	0	0	1.2358	0	0	0	no fragment overlap	0	0	0	0	no fragment overlap	0	0	0	0	no fragment overlap	0	0	0	0	no fragment overlap	0
398	75	NONANE	Dioxane	000111-84-2	C9H20	dry	5.99	5.573	6.008	5.888	5.899	1.328	0.153	0.058	-0.05	1.258	-0.01	0.2	0	0.05	1.38	0	0	0	0	1.3767	0	0	0	no fragment overlap	0	0	0	0	no fragment overlap	0	0	0	0	no fragment overlap	0	0	0	0	no fragment overlap	0
1693	75	CYCLOPROPANE	Dioxane	000075-19-4	C3H6	dry	1.97	1.873	2.01	1.794	1.897	0.657	0.3	0.037	0.018	0.435	0.22	0.27	0	0.01	0.42	0.17	0	0	0	0.4227	0.6481	51.2	0.0383		0	0	0	0	no fragment overlap	0	0	0	0	no fragment overlap	0	0	0	0	no fragment overlap	0
53	75	METHYLCYCLOHEXANE	Dioxane	000108-87-2	C7H14	dry	4.25	4.029	4.268	4.112	4.044	1.109	0.163	0.043	-0.01	0.904	0.22	0.27	0	0.05	0.99	0.26	0.18	0	0	0.9863	0.6786	58.3	0.003		0	0.5193	29.6	0.0021		0	0	0	0	no fragment overlap	0	0	0	0	no fragment overlap	0
401	75	ETHYLCYCLOHEXANE	Dioxane	001678-91-7	C8H16	dry	4.97	4.602	4.807	4.745	4.622	1.189	0.18	0.044	-0.003	1.035	0.22	0.27	0	0.05	1.13	0.26	0.18	0	0	1.1272	0.6786	58.3	0.003		0	0.5193	29.6	0.0021		0	0	0	0	no fragment overlap	0	0	0	0	no fragment overlap	0
1053	75	ETHYLENE	Dioxane	000074-85-1	C2H4	dry	1.37	1.236	1.53	0.986	1.416	0.621	0.325	0.044	0.022	0.329	0.1	0.19	0	0.07	0.35	0.12	0.11	0	0.07	0.3474	0.5931	40.1	0.0018		0	0.3517	14.4	0.0009	low similarity	1	0	0	0	no fragment overlap	0	0.6727	62.8	0.002		0
1055	75	PROPYLENE	Dioxane	000115-07-1	C3H6	dry	1.97	1.754	2.07	1.556	1.968	0.74	0.33	0.039	0.029	0.456	0.13	0.24	0	0.08	0.49	0.12	0.11	0	0.07	0.4883	0.5931	40.1	0.0018		0	0.3517	14.4	0.0009	low similarity	1	0	0	0	no fragment overlap	0	0.6727	62.8	0.002		0
364	75	1,3-BUTADIENE	Dioxane	000106-99-0	C4H6	dry	1.94	1.94	2.316	1.655	2.32	1.041	0.495	0.064	0.079	0.554	0.25	0.3	0	0.14	0.59	0.23	0.23	0	0.14	0.5862	0.4203	17.4	0.0071	low similarity	1	0.746	61.9	0.0037		0	0	0	0	no fragment overlap	0	0.7461	74.9	0.0081		0
1064	75	ETHYNE	Dioxane	000074-86-2	C2H2	dry	1.25	1.01	0.974	0.849	1.096	0.508	0.582	0.226	0.082	0.304	0.36	0.39	0.17	0.07	0.3	0.15	0.24	0.05	0.05	0.3044	0.8229	85	0.0332		0	0.7665	67.2	0.0115		0	0.2134	32.2	0.011		0	0.4484	26.2	0.0202		0
1942	75	PROPYNE	Dioxane	000074-99-7	C3H4	dry	1.45	1.539	1.323	1.389	1.393	0.66	0.581	0.114	0.14	0.427	0.26	0.35	0.09	0.09	0.45	0.15	0.24	0.05	0.12	0.4453	0.8229	85	0.0332		0	0.7665	67.2	0.0115		0	0.2134	32.2	0.011		0	0.8341	87	0.0514		0
1940	75	1-BUTYNE	Dioxane	000107-00-6	C4H6	dry	2.08	2.111	1.909	2.023	1.954	0.773	0.551	0.104	0.14	0.556	0.26	0.36	0.09	0.09	0.59	0.15	0.24	0.05	0.12	0.5862	0.8229	85	0.0332		0	0.7665	67.2	0.0115		0	0.2134	32.2	0.011		0	0.8341	87	0.0514		0
366	75	VINYLACETYLENE	Dioxane	000689-97-4	C4H4	dry	2.38	1.724	1.94	1.487	2.065	0.914	0.617	0.156	0.109	0.524	0.38	0.41	0.09	0.14	0.54	0.27	0.35	0.05	0.2	0.5432	0.4186	17	0.0353	low similarity	1	0.6226	42.5	0.013		0	0.2134	32.2	0.011		0	0.5417	40.2	0.053		0
1014	75	TETRAFLUOROMETHANE[R14]	Dioxane	000075-73-0	CF4	dry	1.27	1.272	2.495	1.271	2.27	-0.006	-0.061	0.046	-0.133	0.426	-0.47	-0.03	0	0	0.32	-0.49	-0.42	0	0	0.3203	0.6313	47.7	0.2027	high leverage	1	0.0106	0.1	0.2389	out of domain structural outlier	2	0	0	0	no fragment overlap	0	0	0	0	no fragment overlap	0
47	75	CHLOROFORM	Dioxane	000067-66-3	CHCl3	dry	2.61	2.66	2.843	2.871	3.059	0.81	0.521	0.172	0.005	0.629	0.34	0.48	0.12	0	0.62	0.39	0.45	0	0	0.6167	0.6073	43.5	0.0197		0	0.578	36.6	0.0035		0	0	0	0	no fragment overlap	0	0	0	0	no fragment overlap	0
157	75	TETRACHLOROMETHANE	Dioxane	000056-23-5	CCl4	dry	3.23	3.282	3.604	3.518	3.578	0.926	0.298	0.067	-0.016	0.759	0.42	0.55	0	0	0.74	0.52	0.6	0	0	0.7391	0.4857	24.2	0.0349	low similarity	1	0.6167	41.8	0.0062		0	0	0	0	no fragment overlap	0	0	0	0	no fragment overlap	0
219	75	TERT-BUTYLCHLORIDE	Dioxane	000507-20-0	C4H9Cl	dry	3.26	3.094	2.629	3.096	2.529	0.89	0.45	0.056	0.17	0.745	0.11	0.26	0	0.07	0.79	0.13	0.15	0	0	0.7946	0.5558	33.3	0.0022		0	0.4394	21.7	0.0004	low similarity	1	0	0	0	no fragment overlap	0	0	0	0	no fragment overlap	0
168	75	TRICHLOROETHYLENE	Dioxane	000079-01-6	C2HCl3	dry	3.28	2.683	3.398	2.703	3.535	1.015	0.447	0.108	-0.014	0.713	0.5	0.64	0	0.11	0.71	0.56	0.56	0	0.07	0.7146	0.6318	47.7	0.0268		0	0.5608	34.3	0.0045		0	0	0	0	no fragment overlap	0	0.6727	62.8	0.002		0
164	75	1,1,2,2-TETRACHLOROETHYLENE	Dioxane	000127-18-4	C2Cl4	dry	3.81	3.148	4.024	3.212	4.083	1.175	0.375	0.051	-0.018	0.836	0.6	0.73	0	0.12	0.84	0.63	0.71	0	0.01	0.837	0.6564	53	0.0354		0	0.5269	30.7	0.0072		0	0	0	0	no fragment overlap	0	0.5888	47.2	0.4152	structural outlier	2
410	75	2-BROMO-2-METHYLPROPANE	Dioxane	000507-19-7	C4H9Br	dry	3.39	3.368	2.814	3.369	2.826	1.045	0.548	0.048	0.175	0.783	0.29	0.34	0	0.07	0.85	0.3	0.25	0	0	0.8472	0.5525	32.9	0.018		0	0.6782	51	0.0086		0	0	0	0	no fragment overlap	0	0	0	0	no fragment overlap	0
774	75	OXACYCLOHEXANE	Dioxane	000142-68-7	C5H10O	dry	1.03	2.234	1.705	1.946	1.363	0.877	0.473	0.011	0.342	0.718	0.25	0.43	0	0.23	0.76	0.26	0.36	0	0.41	0.7632	0.6786	58.3	0.003		0	0.7145	56.6	0.014		0	0	0	0	no fragment overlap	0	0.7666	78.4	0.0424		0
4	75	ACETONE	Dioxane	000067-64-1	C3H6O	dry	0.05	0.774	0.042	0.39	-0.201	0.63	0.712	0.046	0.485	0.515	0.22	0.67	0	0.34	0.55	0.12	0.64	0	0.5	0.547	0.5931	40.1	0.0018		0	0.6565	47.5	0.0268		0	0	0	0	no fragment overlap	0	0.334	13	0.0452	low similarity	1
40	75	2-BUTANONE	Dioxane	000078-93-3	C4H8O	dry	0.56	1.347	0.749	1.023	0.518	0.692	0.668	0.033	0.461	0.649	0.21	0.67	0	0.34	0.69	0.12	0.63	0	0.48	0.6879	0.5931	40.1	0.0018		0	0.891	87.7	0.0084		0	0	0	0	no fragment overlap	0	0.4432	25.5	0.0579		0
976	75	2-OCTANONE	Dioxane	000111-13-7	C8H16O	dry	2.9	3.638	2.998	3.559	2.878	1.126	0.705	0.039	0.467	1.16	0.21	0.69	0	0.35	1.25	0.06	0.63	0	0.5	1.2515	0.4997	26.4	0.0795		0	0.891	87.7	0.0084		0	0	0	0	no fragment overlap	0	0.9604	99	0.0156		0
21	75	ETHYLACETATE	Dioxane	000141-78-6	C4H8O2	dry	1.13	1.433	1	1.075	0.895	0.667	0.735	0.033	0.464	0.716	0.07	0.58	0	0.36	0.75	0.07	0.62	0	0.48	0.7466	0.8503	90.3	0.0205		0	0.7051	54.7	0.0219		0	0	0	0	no fragment overlap	0	0.7374	72.8	0.0319		0
3	75	ACETONITRILE	Dioxane	000075-05-8	C2H3N	dry	0.36	0.814	-0.235	0.734	-0.212	0.504	0.837	0.106	0.417	0.391	0.19	0.72	0	0.2	0.4	0.17	0.56	0.05	0.18	0.4042	0.8597	91.7	0.0113		0	0.2974	9.7	0.0109	low similarity	1	0.2134	32.2	0.011		0	0.4544	26.8	0.0194		0
240	75	BUTYLAMINE	Dioxane	000109-73-9	C4H11N	dry	0.07	0.436	1.07	-0.436	0.273	0.85	0.338	0.278	0.437	0.711	0.2	0.5	0.21	0.58	0.77	0.2	0.32	0.17	0.56	0.772	0.7765	76.4	0.0252		0	0.6992	53.5	0.0019		0	0.8347	87.5	0.0271		0	0.7619	77.9	0.0238		0
72	75	DIMETHYLFORMAMIDE	Dioxane	000068-12-2	C3H7NO	dry	-1.21	-0.187	-0.454	-0.84	-0.79	0.736	0.856	0.041	0.674	0.608	0.35	1.11	0	0.63	0.65	0.34	1.25	0	0.73	0.6468	0.6971	61.8	0.018		0	0.5355	31.7	0.3346	structural outlier	2	0	0	0	no fragment overlap	0	0.4235	22.9	0.026	low similarity	1
110	75	METHANOL	Dioxane	000067-56-1	CH4O	dry	-0.93	-0.217	-0.701	-0.688	-1.252	0.473	0.549	0.586	0.378	0.295	0.21	0.44	0.31	0.3	0.31	0.19	0.28	0.31	0.2	0.3082	0.0194	1.9	0.0022	out of domain	2	0.2446	7.5	0.0017	low similarity	1	0	0	0.0086	out of domain	2	0	0	0.0014	out of domain	2
11	75	ETHANOL	Dioxane	000064-17-5	C2H6O	dry	-0.51	0.356	-0.178	-0.054	-0.76	0.564	0.522	0.562	0.391	0.424	0.21	0.45	0.31	0.31	0.45	0.19	0.37	0.33	0.33	0.4491	0.0194	1.9	0.0022	out of domain	2	0.8374	76.4	0.0078		0	0.296	43.7	0.034		0	0.3233	12.3	0.0151	low similarity	1
140	75	1-PROPANOL	Dioxane	000071-23-8	C3H8O	dry	-0.25	0.929	0.345	0.58	-0.197	0.643	0.538	0.528	0.406	0.556	0.21	0.45	0.31	0.31	0.59	0.19	0.37	0.33	0.39	0.59	0.0194	1.9	0.0022	out of domain	2	0.8374	76.4	0.0078		0	0.296	43.7	0.034		0	0.3558	14.6	0.0213	low similarity	1
95	75	2-PROPANOL	Dioxane	000067-63-0	C3H8O	dry	-0.28	0.799	0.273	0.367	-0.315	0.654	0.524	0.513	0.422	0.554	0.22	0.43	0.31	0.34	0.59	0.19	0.28	0.31	0.42	0.59	0.0194	1.9	0.0022	out of domain	2	0.2446	7.5	0.0017	low similarity	1	0	0	0.0086	out of domain	2	0	0	0.1444	out of domain	2
22	75	2-BUTANOL	Dioxane	000078-92-2	C4H10O	dry	0.67	1.371	1.119	1	0.642	0.743	0.517	0.503	0.365	0.682	0.21	0.44	0.31	0.34	0.73	0.19	0.28	0.31	0.51	0.7309	0.0194	1.9	0.0022	out of domain	2	0.2446	7.5	0.0017	low similarity	1	0	0	0.0086	out of domain	2	0.7584	77.3	0.0354		0
1787	75	CYCLOPENTANOL	Dioxane	000096-41-3	C5H10O	dry	0.61	1.672	1.067	1.332	0.491	0.841	0.524	0.515	0.422	0.729	0.42	0.53	0.31	0.32	0.76	0.46	0.56	0.31	0.59	0.7632	0.666	54.5	0.0788		0	0.2001	4.3	0.0078	out of domain	2	0	0	0.0086	out of domain	2	0.8535	88.7	0.0234		0
1795	75	2,2,2-TRIFLUOROETHANOL	Dioxane	000075-89-8	C2H3F3O	dry	0.97	0.893	1.221	0.916	1.181	0.159	0.607	0.964	0.15	0.57	-0.15	0.28	0.54	0.19	0.5	-0.13	0.26	0.41	0.33	0.5022	0.315	10.1	0.0139	low similarity	1	0.5287	31.1	0.0223		0	0.2417	35.7	0.0598	high leverage	1	0.3233	12.3	0.0151	low similarity	1
31	75	BENZENE	Dioxane	000071-43-2	C6H6	dry	2.69	2.667	2.746	2.69	2.875	1.173	0.598	0.059	0.102	0.674	0.56	0.69	0	0.12	0.72	0.58	0.6	0	0.13	0.7164	0.3858	14.7	0.0092	low similarity	1	0.7874	70.4	0.0024		0	0	0	0	no fragment overlap	0	0.6062	49.6	0.0039		0
161	75	TOLUENE	Dioxane	000108-88-3	C7H8	dry	3.16	3.264	3.239	3.28	3.358	1.315	0.606	0.056	0.121	0.802	0.58	0.63	0	0.12	0.86	0.63	0.62	0	0.16	0.8573	0.5953	40.7	0.0035		0	0.8573	81	0.0021		0	0	0	0	no fragment overlap	0	0.7763	79.5	0.0029		0
25	75	ETHYLBENZENE	Dioxane	000100-41-4	C8H10	dry	3.6	3.837	3.751	3.915	3.88	1.428	0.614	0.054	0.132	0.928	0.58	0.64	0	0.12	1	0.63	0.48	0	0.17	0.9982	0.5953	40.7	0.0035		0	0.942	96.3	0.011		0	0	0	0	no fragment overlap	0	0.8392	87.5	0.0042		0
471	75	BIPHENYL	Dioxane	000092-52-4	C12H10	dry	4.86	4.988	4.628	5.043	5.099	2.339	1.096	0.088	0.267	1.232	1.39	1.16	0	0.21	1.32	1.32	1.07	0	0.27	1.3242	0.5679	35.5	0.0134		0	0.8607	81.2	0.006		0	0	0	0	no fragment overlap	0	0.6182	52.1	0.0119		0
123	75	NAPHTHALENE	Dioxane	000091-20-3	C10H8	dry	4.12	4.152	3.969	4.113	4.313	2.055	0.936	0.077	0.202	1.018	1.27	1.02	0	0.17	1.09	1.28	0.93	0	0.18	1.0854	0.4324	18.5	0.0099	low similarity	1	0.7946	71.1	0.0038		0	0	0	0	no fragment overlap	0	0.6351	55.2	0.007		0
1169	75	ACENAPHTHYLENE-1,2-DIHYDRO	Dioxane	000083-32-9	C12H10	dry	4.72	5.077	4.576	4.996	4.877	2.33	0.96	0.055	0.247	1.19	1.53	0.99	0	0.15	1.26	1.58	1.07	0	0.27	1.2586	0.6334	47.9	0.1371	high leverage	1	0.6768	50.5	0.0085		0	0	0	0	no fragment overlap	0	0.7471	75.1	0.0146		0
1183	75	FLUORANTHENE	Dioxane	000206-44-0	C16H10	dry	6.11	6.283	5.606	6.028	6.104	3.527	1.389	0.112	0.37	1.495	2.6	1.52	0	0.25	1.58	2.27	1.53	0	0.32	1.5846	0.1058	2.8	0.3054	out of domain structural outlier	2	0.5354	31.6	0.0121		0	0	0	0	no fragment overlap	0	0.4466	25.9	0.0269		0
927	75	PHENANTHRENE	Dioxane	000085-01-8	C14H10	dry	5.51	5.631	5.1	5.53	5.574	3.016	1.258	0.111	0.321	1.357	1.99	1.34	0	0.23	1.45	2.07	1.25	0	0.22	1.4544	0.6251	46.3	0.1686	high leverage	1	0.6533	47.1	0.007		0	0	0	0	no fragment overlap	0	0.6043	49.3	0.011		0
2822	75	HEXACHLOROBENZENE	Dioxane	000118-74-1	C6Cl6	dry	6.34	6.515	5.88	7.198	6.02	2.337	0.714	0.053	0.171	1.409	1.33	1.23	0	0	1.45	1.42	1.08	0	0	1.4508	0.4172	17	0.0278	low similarity	1	0.4378	21.5	0.0112	low similarity	1	0	0	0	no fragment overlap	0	0	0	0	no fragment overlap	0
492	75	BENZYLCHLORIDE	Dioxane	000100-44-7	C7H7Cl	dry	3.92	3.812	3.312	3.951	3.763	1.47	0.948	0.1	0.222	0.936	0.7	0.78	0	0.12	0.98	0.83	0.8	0	0.17	0.9797	0.7005	62.3	0.0099		0	0.6639	48.6	0.0211		0	0	0	0	no fragment overlap	0	0.8392	87.5	0.0042		0
6465	75	ACETAMINOPHEN	Dioxane	000103-90-2	C8H9NO2	dry	0.05	0.245	0.936	-0.333	0.683	1.657	1.339	1.281	0.732	1.106	1.12	1.66	0.91	0.93	1.17	1.07	1.82	0.91	0.75	1.1724	0.7434	70.8	0.1979	high leverage	1	0.7737	68.4	0.1222	high leverage	1	0.0414	2.8	0.0603	out of domain	2	0.7903	82.1	0.0205		0
5972	75	DIPHENYL-SULFONE	Dioxane	000127-63-9	C12H10O2S	dry	3.63	3.505	3.295	3.362	3.697	2.327	1.549	0.124	0.769	1.508	1.26	2.01	0	0.74	1.61	1.49	2.02	0	0.77	1.6051	0.4724	23.2	0.0293	low similarity	1	0.4865	26.6	0.0247		0	0	0	0	no fragment overlap	0	0.6377	55.7	0.0197		0
114	75	MORPHOLINE	Dioxane	000110-91-8	C4H9NO	dry	-1.07	-0.071	0.042	-1.154	-0.504	0.847	0.709	0.164	0.641	0.693	0.37	0.62	0.16	0.66	0.72	0.43	0.68	0.14	0.94	0.7221	0.6999	62.2	0.0045		0	0.639	45.3	0.0148		0	0.3963	51	0.042		0	0.2955	10.4	0.0444	low similarity	1
833	75	ACETYLAMINOBENZENE	Dioxane	000103-84-4	C8H9NO	dry	1.475	1.493	1.919	1.145	1.972	1.62	1.167	0.502	0.564	1.043	0.89	1.42	0.41	0.67	1.11	1	1.35	0.49	0.68	1.1137	0.5432	31.7	0.0344		0	0.7694	67.8	0.1037	high leverage	1	0.2639	39.5	0.1739	structural outlier	2	0.5356	39.1	0.0436		0
859	75	4-NITROANILINE	Dioxane	000100-01-6	C6H6N2O2	dry	2.628	1.786	1.338	1.717	1.461	1.614	1.318	0.843	0.559	0.947	1.13	1.65	0.28	0.53	0.99	1.2	1.62	0.27	0.45	0.9904	0.734	68.5	0.0114		0	0.4809	26.1	0.0786		0	0	0	0.012	out of domain	2	0.6066	49.7	0.0106		0
1051	161	METHANE	Toluene	000074-82-8	CH4	dry/wet	1.201	1.114	1.44	1.055	1.211	0.516	0.15	0.035	-0.042	0.228	0.11	0.21	0	0.01	0.25	0	0	0	0	0.2495	0	0	0	no fragment overlap	0	0	0	0	no fragment overlap	0	0	0	0	no fragment overlap	0	0	0	0	no fragment overlap	0
316	161	2-METHYLPROPANE	Toluene	000075-28-5	C4H10	dry/wet	3.25	2.775	3.343	2.603	3.021	0.773	0.127	0.044	-0.043	0.618	0.01	0.17	0	0.06	0.67	0	0	0	0	0.6722	0	0	0	no fragment overlap	0	0	0	0	no fragment overlap	0	0	0	0	no fragment overlap	0	0	0	0	no fragment overlap	0
134	161	PENTANE	Toluene	000109-66-0	C5H12	dry/wet	4.005	3.516	4.065	3.383	3.71	0.876	0.106	0.049	-0.06	0.747	0	0.19	0	0.04	0.81	0	0	0	0	0.8131	0	0	0	no fragment overlap	0	0	0	0	no fragment overlap	0	0	0	0	no fragment overlap	0	0	0	0	no fragment overlap	0
89	161	HEXANE	Toluene	000110-54-3	C6H14	dry/wet	4.641	4.138	4.666	3.998	4.268	0.98	0.097	0.055	-0.055	0.875	0	0.19	0	0.04	0.95	0	0	0	0	0.954	0	0	0	no fragment overlap	0	0	0	0	no fragment overlap	0	0	0	0	no fragment overlap	0	0	0	0	no fragment overlap	0
91	161	HEPTANE	Toluene	000142-82-5	C7H16	dry/wet	5.295	4.76	5.253	4.613	4.847	1.105	0.122	0.055	-0.049	1	0	0.2	0	0.05	1.09	0	0	0	0	1.0949	0	0	0	no fragment overlap	0	0	0	0	no fragment overlap	0	0	0	0	no fragment overlap	0	0	0	0	no fragment overlap	0
74	161	2,4-DIMETHYLPENTANE	Toluene	000108-08-7	C7H16	dry/wet	5.044	4.523	4.879	4.284	4.404	1.061	0.115	0.06	0.017	0.995	0.02	0.16	0	0.1	1.09	0	0	0	0	1.0949	0	0	0	no fragment overlap	0	0	0	0	no fragment overlap	0	0	0	0	no fragment overlap	0	0	0	0	no fragment overlap	0
128	161	OCTANE	Toluene	000111-65-9	C8H18	dry/wet	5.963	5.383	5.939	5.229	5.525	1.191	0.126	0.058	-0.057	1.135	0	0.2	0	0.05	1.24	0	0	0	0	1.2358	0	0	0	no fragment overlap	0	0	0	0	no fragment overlap	0	0	0	0	no fragment overlap	0	0	0	0	no fragment overlap	0
1283	161	2,5-DIMETHYLHEXANE	Toluene	000592-13-2	C8H18	dry/wet	5.496	5.146	5.548	4.9	5.079	1.155	0.133	0.062	0.01	1.128	0.02	0.17	0	0.1	1.24	0	0	0	0	1.2358	0	0	0	no fragment overlap	0	0	0	0	no fragment overlap	0	0	0	0	no fragment overlap	0	0	0	0	no fragment overlap	0
398	161	NONANE	Toluene	000111-84-2	C9H20	dry/wet	6.496	6.001	6.517	5.839	6.093	1.328	0.153	0.058	-0.05	1.258	-0.01	0.2	0	0.05	1.38	0	0	0	0	1.3767	0	0	0	no fragment overlap	0	0	0	0	no fragment overlap	0	0	0	0	no fragment overlap	0	0	0	0	no fragment overlap	0
401	161	ETHYLCYCLOHEXANE	Toluene	001678-91-7	C8H16	dry/wet	5.498	4.934	5.226	4.83	4.818	1.189	0.18	0.044	-0.003	1.035	0.22	0.27	0	0.05	1.13	0.26	0.18	0	0	1.1272	0.6786	58.3	0.003		0	0.5193	29.6	0.0021		0	0	0	0	no fragment overlap	0	0	0	0	no fragment overlap	0
1053	161	ETHYLENE	Toluene	000074-85-1	C2H4	dry/wet	1.443	1.307	1.493	1.155	1.387	0.621	0.325	0.044	0.022	0.329	0.1	0.19	0	0.07	0.35	0.12	0.11	0	0.07	0.3474	0.5931	40.1	0.0018		0	0.3517	14.4	0.0009	low similarity	1	0	0	0	no fragment overlap	0	0.6727	62.8	0.002		0
1055	161	PROPYLENE	Toluene	000115-07-1	C3H6	dry/wet	2.178	1.855	2.111	1.694	1.971	0.74	0.33	0.039	0.029	0.456	0.13	0.24	0	0.08	0.49	0.12	0.11	0	0.07	0.4883	0.5931	40.1	0.0018		0	0.3517	14.4	0.0009	low similarity	1	0	0	0	no fragment overlap	0	0.6727	62.8	0.002		0
368	161	1-BUTENE	Toluene	000106-98-9	C4H8	dry/wet	2.775	2.476	2.747	2.309	2.562	0.849	0.318	0.041	0.031	0.585	0.13	0.24	0	0.09	0.63	0.12	0.11	0	0.07	0.6292	0.5931	40.1	0.0018		0	0.3517	14.4	0.0009	low similarity	1	0	0	0	no fragment overlap	0	0.6727	62.8	0.002		0
460	161	CIS-2-BUTENE	Toluene	000590-18-1	C4H8	dry/wet	2.915	2.406	2.719	2.238	2.535	0.858	0.321	0.042	0.032	0.58	0.16	0.28	0	0.1	0.63	0.16	0.11	0	0.07	0.6292	0.6665	54.7	0.0092		0	0.3517	14.4	0.0009	low similarity	1	0	0	0	no fragment overlap	0	0.6727	62.8	0.002		0
450	161	TRANS-2-BUTENE	Toluene	000624-64-6	C4H8	dry/wet	2.851	2.406	2.835	2.238	2.638	0.863	0.3	0.041	0.018	0.586	0.16	0.28	0	0.1	0.63	0.16	0.11	0	0.07	0.6292	0.6665	54.7	0.0092		0	0.3517	14.4	0.0009	low similarity	1	0	0	0	no fragment overlap	0	0.6727	62.8	0.002		0
257	161	1-PENTENE	Toluene	000109-67-1	C5H10	dry/wet	3.507	3.099	3.365	2.924	3.135	0.95	0.307	0.046	0.036	0.716	0.13	0.24	0	0.09	0.77	0.12	0.11	0	0.07	0.7701	0.5931	40.1	0.0018		0	0.3517	14.4	0.0009	low similarity	1	0	0	0	no fragment overlap	0	0.6727	62.8	0.002		0
100	161	1-HEXENE	Toluene	000592-41-6	C6H12	dry/wet	4.003	3.72	3.931	3.54	3.664	1.074	0.311	0.05	0.045	0.839	0.12	0.25	0	0.09	0.91	0.12	0.11	0	0.07	0.911	0.5931	40.1	0.0018		0	0.3517	14.4	0.0009	low similarity	1	0	0	0	no fragment overlap	0	0.6727	62.8	0.002		0
457	161	ISOBUTYLENE	Toluene	000115-11-7	C4H8	dry/wet	2.612	2.429	2.592	2.216	2.406	0.859	0.34	0.043	0.055	0.58	0.11	0.18	0	0.1	0.63	0.18	0.11	0	0.07	0.6292	0.4198	17.1	0.0718	low similarity	1	0.3517	14.4	0.0009	low similarity	1	0	0	0	no fragment overlap	0	0.6727	62.8	0.002		0
356	161	3-METHYL-1-BUTENE	Toluene	000563-45-1	C5H10	dry/wet	3.489	2.98	3.206	2.76	2.961	0.928	0.311	0.045	0.06	0.709	0.13	0.23	0	0.12	0.77	0.12	0.11	0	0.07	0.7701	0.5931	40.1	0.0018		0	0.3517	14.4	0.0009	low similarity	1	0	0	0	no fragment overlap	0	0.6727	62.8	0.002		0
364	161	1,3-BUTADIENE	Toluene	000106-99-0	C4H6	dry/wet	2.318	2.059	2.279	1.851	2.214	1.041	0.495	0.064	0.079	0.554	0.25	0.3	0	0.14	0.59	0.23	0.23	0	0.14	0.5862	0.4203	17.4	0.0071	low similarity	1	0.746	61.9	0.0037		0	0	0	0	no fragment overlap	0	0.7461	74.9	0.0081		0
98	161	2-METHYL-1,3-BUTADIENE	Toluene	000078-79-5	C5H8	dry/wet	2.929	2.634	2.778	2.373	2.637	1.114	0.473	0.062	0.105	0.678	0.23	0.24	0	0.16	0.73	0.36	0.23	0	0.14	0.7271	0.4882	24.5	0.3453	structural outlier	2	0.746	61.9	0.0037		0	0	0	0	no fragment overlap	0	0.7461	74.9	0.0081		0
1014	161	TETRAFLUOROMETHANE[R14]	Toluene	000075-73-0	CF4	dry/wet	1.491	1.372	2.623	1.176	2.378	-0.006	-0.061	0.046	-0.133	0.426	-0.47	-0.03	0	0	0.32	-0.49	-0.42	0	0	0.3203	0.6313	47.7	0.2027	high leverage	1	0.0106	0.1	0.2389	out of domain structural outlier	2	0	0	0	no fragment overlap	0	0	0	0	no fragment overlap	0
47	161	CHLOROFORM	Toluene	000067-66-3	CHCl3	dry/wet	2.332	2.399	2.512	2.532	2.643	0.81	0.521	0.172	0.005	0.629	0.34	0.48	0.12	0	0.62	0.39	0.45	0	0	0.6167	0.6073	43.5	0.0197		0	0.578	36.6	0.0035		0	0	0	0	no fragment overlap	0	0	0	0	no fragment overlap	0
157	161	TETRACHLOROMETHANE	Toluene	000056-23-5	CCl4	dry/wet	3.363	3.326	3.742	3.429	3.569	0.926	0.298	0.067	-0.016	0.759	0.42	0.55	0	0	0.74	0.52	0.6	0	0	0.7391	0.4857	24.2	0.0349	low similarity	1	0.6167	41.8	0.0062		0	0	0	0	no fragment overlap	0	0	0	0	no fragment overlap	0
332	161	1-CHLOROPROPANE	Toluene	000540-54-5	C3H7Cl	dry/wet	2.422	2.794	2.446	2.736	2.375	0.8	0.451	0.051	0.094	0.619	0.13	0.32	0	0.03	0.65	0.2	0.32	0	0	0.6537	0.7377	69.2	0.0066		0	0.7947	71.2	0.0103		0	0	0	0	no fragment overlap	0	0	0	0	no fragment overlap	0
219	161	TERT-BUTYLCHLORIDE	Toluene	000507-20-0	C4H9Cl	dry/wet	3.489	3.29	2.685	3.148	2.507	0.89	0.45	0.056	0.17	0.745	0.11	0.26	0	0.07	0.79	0.13	0.15	0	0	0.7946	0.5558	33.3	0.0022		0	0.4394	21.7	0.0004	low similarity	1	0	0	0	no fragment overlap	0	0	0	0	no fragment overlap	0
1801	161	1-CHLOROHEXANE	Toluene	000544-10-5	C6H13Cl	dry/wet	4.306	4.652	4.41	4.572	4.318	1.112	0.492	0.048	0.086	1.011	0.12	0.33	0	0.04	1.08	0.2	0.44	0	0.08	1.0764	0.7377	69.2	0.0066		0	0.9102	91.2	0.04		0	0	0	0	no fragment overlap	0	0.9352	95.6	0.042		0
30856	161	ETHYLBROMIDE	Toluene	000074-96-4	C2H5Br	dry/wet	2.035	2.441	1.978	2.438	1.946	0.817	0.494	0.055	0.103	0.533	0.31	0.4	0	0.03	0.57	0.34	0.39	0	0.09	0.5654	0.8018	81.2	0.019		0	0.9742	99	0.0263		0	0	0	0	no fragment overlap	0	0.8791	91	0.0371		0
911	161	1,1-DIFLUOROETHANE	Toluene	000075-37-6	C2H4F2	dry/wet	1.202	1.641	1.118	1.563	1.201	0.307	0.487	0.106	0.125	0.459	-0.22	0.08	0.09	0	0.43	-0.2	0	0	0	0.4258	0.5724	36.2	0.0116		0	0	0	0	no fragment overlap	0	0	0	0	no fragment overlap	0	0	0	0	no fragment overlap	0
580	161	DIMETHYLETHER	Toluene	000115-10-6	C2H6O	dry/wet	0.186	0.804	0.717	0.422	0.482	0.572	0.432	0.018	0.271	0.428	0.05	0.33	0	0.24	0.45	0	0.28	0	0.24	0.4491	0	0	0	no fragment overlap	0	0.7078	55.3	0.0125		0	0	0	0	no fragment overlap	0	0.2	5	0.014	low similarity	1
12	161	DIETHYLETHER	Toluene	000060-29-7	C4H10O	dry/wet	1.15	2.049	2.066	1.653	1.712	0.764	0.367	0.029	0.262	0.69	0.04	0.34	0	0.25	0.73	0	0.26	0	0.51	0.7309	0	0	0	no fragment overlap	0	0.7658	66.6	0.0255		0	0	0	0	no fragment overlap	0	0	0	0.3439	out of domain structural outlier	2
96	161	DIISOPROPYLETHER	Toluene	000108-20-3	C6H14O	dry/wet	1.87	3.056	2.904	2.554	2.431	0.939	0.36	0.058	0.325	0.939	0.06	0.31	0	0.31	1.01	0	0	0	0.38	1.0127	0	0	0	no fragment overlap	0	0	0	0	no fragment overlap	0	0	0	0	no fragment overlap	0	0.1435	1.9	0.0183	out of domain	2
822	161	METHYLTERT-BUTYLETHER	Toluene	001634-04-4	C5H12O	dry/wet	1.1	2.542	2.106	2.062	1.669	0.82	0.393	0.047	0.356	0.808	0.03	0.27	0	0.29	0.87	0	0.14	0	0.22	0.8718	0	0	0	no fragment overlap	0	0.6134	41.2	0.0031		0	0	0	0	no fragment overlap	0	0	0	0.0035	out of domain	2
1409	161	TERT-BUTYLETHYLETHER	Toluene	000637-92-3	C6H14O	dry/wet	1.74	3.164	2.845	2.678	2.374	0.932	0.37	0.052	0.335	0.935	0.02	0.28	0	0.29	1.01	0	0.18	0	0.26	1.0127	0	0	0	no fragment overlap	0	0.363	15.2	0.1265	high leverage low similarity	1	0	0	0	no fragment overlap	0	0	0	0.0101	out of domain	2
876	161	METHYLTERT-AMYLETHER	Toluene	000994-05-8	C6H14O	dry/wet	1.705	3.164	2.603	2.678	2.132	0.912	0.402	0.048	0.376	0.93	0.02	0.28	0	0.29	1.01	0	0.14	0	0.22	1.0127	0	0	0	no fragment overlap	0	0.6134	41.2	0.0031		0	0	0	0	no fragment overlap	0	0	0	0.0035	out of domain	2
313	161	BUTANAL	Toluene	000123-72-8	C4H8O	dry/wet	0.605	1.305	1.023	0.947	0.884	0.714	0.641	0.025	0.391	0.644	0.24	0.73	0	0.32	0.69	0.17	0.63	0	0.46	0.6879	0.4992	26	0.0159		0	0.9083	90.7	0.0221		0	0	0	0	no fragment overlap	0	0.9763	100	0.1445	high leverage	1
4	161	ACETONE	Toluene	000067-64-1	C3H6O	dry/wet	-0.249	0.635	-0.175	0.239	-0.304	0.63	0.712	0.046	0.485	0.515	0.22	0.67	0	0.34	0.55	0.12	0.64	0	0.5	0.547	0.5931	40.1	0.0018		0	0.6565	47.5	0.0268		0	0	0	0	no fragment overlap	0	0.334	13	0.0452	low similarity	1
40	161	2-BUTANONE	Toluene	000078-93-3	C4H8O	dry/wet	0.427	1.258	0.653	0.855	0.478	0.692	0.668	0.033	0.461	0.649	0.21	0.67	0	0.34	0.69	0.12	0.63	0	0.48	0.6879	0.5931	40.1	0.0018		0	0.891	87.7	0.0084		0	0	0	0	no fragment overlap	0	0.4432	25.5	0.0579		0
137	161	2-PENTANONE	Toluene	000107-87-9	C5H10O	dry/wet	1.099	1.88	1.237	1.47	1.045	0.813	0.68	0.037	0.462	0.769	0.21	0.68	0	0.34	0.83	0.12	0.63	0	0.5	0.8288	0.5931	40.1	0.0018		0	0.891	87.7	0.0084		0	0	0	0	no fragment overlap	0	0.9604	99	0.0156		0
616	161	METHYLBUTYLKETONE	Toluene	000591-78-6	C6H12O	dry/wet	1.695	2.503	1.884	2.086	1.664	0.903	0.681	0.035	0.467	0.905	0.21	0.68	0	0.35	0.97	0.12	0.63	0	0.5	0.9697	0.5931	40.1	0.0018		0	0.891	87.7	0.0084		0	0	0	0	no fragment overlap	0	0.9604	99	0.0156		0
92	161	2-HEPTANONE	Toluene	000110-43-0	C7H14O	dry/wet	2.368	3.124	2.506	2.701	2.279	1.022	0.696	0.039	0.463	1.029	0.21	0.69	0	0.35	1.11	0.08	0.63	0	0.5	1.1106	0.3755	14	0.0344	low similarity	1	0.891	87.7	0.0084		0	0	0	0	no fragment overlap	0	0.9604	99	0.0156		0
662	161	3,3-DIMETHYL-2-BUTANONE	Toluene	000075-97-8	C6H12O	dry/wet	1.385	2.378	1.595	1.886	1.277	0.88	0.639	0.039	0.514	0.89	0.2	0.62	0	0.38	0.97	0.12	0.47	0	0.39	0.9697	0.5931	40.1	0.0018		0	0.7539	63.8	0.0068		0	0	0	0	no fragment overlap	0	0.5731	45.1	0.0115		0
82	161	METHYLACETATE	Toluene	000079-20-9	C3H6O2	dry/wet	0.36	0.784	0.273	0.3	0.261	0.57	0.757	0.044	0.446	0.585	0.07	0.57	0	0.36	0.61	0.11	0.61	0	0.4	0.6057	0.631	47.6	0.0298		0	0.6969	53.3	0.0096		0	0	0	0	no fragment overlap	0	0.5298	38.1	0.0225		0
21	161	ETHYLACETATE	Toluene	000141-78-6	C4H8O2	dry/wet	1.004	1.401	0.882	0.909	0.796	0.667	0.735	0.033	0.464	0.716	0.07	0.58	0	0.36	0.75	0.07	0.62	0	0.48	0.7466	0.8503	90.3	0.0205		0	0.7051	54.7	0.0219		0	0	0	0	no fragment overlap	0	0.7374	72.8	0.0319		0
80	161	BUTYLACETATE	Toluene	000123-86-4	C6H12O2	dry/wet	2.143	2.641	2.3	2.135	2.156	0.85	0.703	0.033	0.437	0.973	0.06	0.59	0	0.37	1.03	0.07	0.57	0	0.46	1.0284	0.8503	90.3	0.0205		0	0.9448	96.5	0.0095		0	0	0	0	no fragment overlap	0	0.8152	85.1	0.0324		0
400	161	METHYLPROPIONATE	Toluene	000554-12-1	C4H8O2	dry/wet	1.236	1.401	0.837	0.909	0.748	0.653	0.734	0.033	0.469	0.713	0.07	0.58	0	0.36	0.75	0.09	0.6	0	0.44	0.7466	0.4929	25.2	0.0079		0	0.9361	95.5	0.0047		0	0	0	0	no fragment overlap	0	0.4969	33.4	0.0519		0
216	161	METHYLPENTANOATE	Toluene	000624-24-8	C6H12O2	dry/wet	2.261	2.641	2.256	2.135	2.156	0.87	0.744	0.032	0.439	0.969	0.06	0.59	0	0.37	1.03	0.09	0.6	0	0.46	1.0284	0.4929	25.2	0.0079		0	0.9361	95.5	0.0047		0	0	0	0	no fragment overlap	0	0.9413	96.8	0.0122		0
686	161	METHYLCAPROATE	Toluene	000106-70-7	C7H14O2	dry/wet	2.846	3.264	2.881	2.751	2.774	0.997	0.764	0.032	0.438	1.094	0.06	0.59	0	0.37	1.17	0.05	0.6	0	0.46	1.1693	0.411	16.5	0.0404	low similarity	1	0.9361	95.5	0.0047		0	0	0	0	no fragment overlap	0	0.9413	96.8	0.0122		0
3	161	ACETONITRILE	Toluene	000075-05-8	C2H3N	dry/wet	-0.171	0.581	-0.748	0.408	-0.602	0.504	0.837	0.106	0.417	0.391	0.19	0.72	0	0.2	0.4	0.17	0.56	0.05	0.18	0.4042	0.8597	91.7	0.0113		0	0.2974	9.7	0.0109	low similarity	1	0.2134	32.2	0.011		0	0.4544	26.8	0.0194		0
326	161	PROPIONITRILE	Toluene	000107-12-0	C3H5N	dry/wet	0.324	1.204	0.048	1.023	0.069	0.598	0.767	0.06	0.422	0.519	0.19	0.73	0	0.2	0.55	0.17	0.56	0.05	0.3	0.5451	0.8597	91.7	0.0113		0	0.2974	9.7	0.0109	low similarity	1	0.2134	32.2	0.011		0	0.7429	73.4	0.0382		0
178	161	METHYLAMINE	Toluene	000074-89-5	CH5N	dry/wet	-1.398	-1.899	-1.289	-2.581	-1.759	0.571	0.359	0.279	0.435	0.322	0.21	0.49	0.21	0.57	0.35	0.26	0.32	0.27	0.26	0.3493	0.558	33.7	0.0112		0	0.6992	53.5	0.0019		0	0	0	0.012	out of domain	2	0.1311	1.3	0.0062	out of domain	2
377	161	PROPYLAMINE	Toluene	000107-10-8	C3H9N	dry/wet	-0.64	-0.654	0.025	-1.35	-0.522	0.752	0.333	0.276	0.433	0.582	0.2	0.5	0.21	0.58	0.63	0.26	0.32	0.17	0.56	0.6311	0.558	33.7	0.0112		0	0.6992	53.5	0.0019		0	0.8347	87.5	0.0271		0	0.7619	77.9	0.0238		0
240	161	BUTYLAMINE	Toluene	000109-73-9	C4H11N	dry/wet	0.137	-0.032	0.634	-0.735	0.064	0.85	0.338	0.278	0.437	0.711	0.2	0.5	0.21	0.58	0.77	0.2	0.32	0.17	0.56	0.772	0.7765	76.4	0.0252		0	0.6992	53.5	0.0019		0	0.8347	87.5	0.0271		0	0.7619	77.9	0.0238		0
179	161	DIMETHYLAMINE	Toluene	000124-40-3	C2H7N	dry/wet	-1.186	-0.467	0.146	-1.098	-0.323	0.668	0.311	0.179	0.343	0.455	0.16	0.34	0.13	0.47	0.49	0.17	0.32	0.21	0.53	0.4902	0.2386	5.8	0.0025	low similarity	1	0.6992	53.5	0.0019		0	0.0009	0.3	0.3082	out of domain structural outlier	2	0.2127	5.5	0.1791	high leverage low similarity	1
61	161	DIETHYLAMINE	Toluene	000109-89-7	C4H11N	dry/wet	-0.241	0.773	1.672	0.127	1.146	0.867	0.277	0.165	0.308	0.716	0.15	0.35	0.13	0.48	0.77	0.17	0.32	0.02	0.59	0.772	0.2386	5.8	0.0025	low similarity	1	0.6992	53.5	0.0019		0	0.3635	48.3	0.4003	structural outlier	2	0.3023	10.8	0.0392	low similarity	1
86	161	DIPROPYLAMINE	Toluene	000142-84-7	C6H15N	dry/wet	1.161	2.018	2.789	1.358	2.202	1.078	0.292	0.174	0.332	0.971	0.15	0.36	0.13	0.48	1.05	0.17	0.32	0.14	0.59	1.0538	0.2386	5.8	0.0025	low similarity	1	0.6992	53.5	0.0019		0	0.3963	51	0.042		0	0.3023	10.8	0.0392	low similarity	1
533	161	TRIMETHYLAMINE	Toluene	000075-50-3	C3H9N	dry/wet	-0.364	0.313	1.528	-0.478	1.06	0.798	0.283	0.066	0.264	0.581	0.17	0.36	0	0.53	0.63	0.17	0.32	0	0.62	0.6311	0.2386	5.8	0.0025	low similarity	1	0.6992	53.5	0.0019		0	0	0	0	no fragment overlap	0	0.3054	11	0.2454	high leverage low similarity	1
126	161	1-NITROPROPANE	Toluene	000108-03-2	C3H7NO2	dry/wet	1.398	1.755	1.088	1.507	1.244	0.675	0.826	0.071	0.351	0.68	0.22	0.72	0	0.25	0.71	0.24	0.54	0	0.29	0.7055	0.7412	70.2	0.0041		0	0.1849	3.8	0.0036	out of domain	2	0	0	0	no fragment overlap	0	0.8163	85.2	0.0793		0
110	161	METHANOL	Toluene	000067-56-1	CH4O	dry/wet	-1.964	-1.069	-2.25	-1.298	-2.343	0.473	0.549	0.586	0.378	0.295	0.21	0.44	0.31	0.3	0.31	0.19	0.28	0.31	0.2	0.3082	0.0194	1.9	0.0022	out of domain	2	0.2446	7.5	0.0017	low similarity	1	0	0	0.0086	out of domain	2	0	0	0.0014	out of domain	2
11	161	ETHANOL	Toluene	000064-17-5	C2H6O	dry/wet	-1.468	-0.446	-1.586	-0.683	-1.755	0.564	0.522	0.562	0.391	0.424	0.21	0.45	0.31	0.31	0.45	0.19	0.37	0.33	0.33	0.4491	0.0194	1.9	0.0022	out of domain	2	0.8374	76.4	0.0078		0	0.296	43.7	0.034		0	0.3233	12.3	0.0151	low similarity	1
140	161	1-PROPANOL	Toluene	000071-23-8	C3H8O	dry/wet	-0.814	0.176	-0.926	-0.068	-1.117	0.643	0.538	0.528	0.406	0.556	0.21	0.45	0.31	0.31	0.59	0.19	0.37	0.33	0.39	0.59	0.0194	1.9	0.0022	out of domain	2	0.8374	76.4	0.0078		0	0.296	43.7	0.034		0	0.3558	14.6	0.0213	low similarity	1
39	161	1-BUTANOL	Toluene	000071-36-3	C4H10O	dry/wet	-0.134	0.798	-0.419	0.548	-0.653	0.75	0.524	0.567	0.409	0.682	0.2	0.46	0.31	0.31	0.73	0.19	0.37	0.36	0.47	0.7309	0.0194	1.9	0.0022	out of domain	2	0.8374	76.4	0.0078		0	0.4208	54.5	0.0196		0	0.9246	94.4	0.0188		0
22	161	2-BUTANOL	Toluene	000078-92-2	C4H10O	dry/wet	-0.313	0.68	-0.013	0.383	-0.214	0.743	0.517	0.503	0.365	0.682	0.21	0.44	0.31	0.34	0.73	0.19	0.28	0.31	0.51	0.7309	0.0194	1.9	0.0022	out of domain	2	0.2446	7.5	0.0017	low similarity	1	0	0	0.0086	out of domain	2	0.7584	77.3	0.0354		0
120	161	2-METHYL-1-PROPANOL	Toluene	000078-83-1	C4H10O	dry/wet	-0.214	0.68	-0.151	0.383	-0.334	0.756	0.523	0.552	0.358	0.676	0.21	0.44	0.31	0.34	0.73	0.19	0.37	0.27	0.33	0.7309	0.0194	1.9	0.0022	out of domain	2	0.8374	76.4	0.0078		0	0.6981	79.2	0.0972	high leverage	1	0.3233	12.3	0.0151	low similarity	1
153	161	TERT-BUTANOL	Toluene	000075-65-0	C4H10O	dry/wet	-0.541	0.67	-0.484	0.343	-0.805	0.744	0.515	0.489	0.469	0.679	0.19	0.39	0.31	0.35	0.73	0.19	0.28	0.31	0.86	0.7309	0.0194	1.9	0.0022	out of domain	2	0.2446	7.5	0.0017	low similarity	1	0	0	0.0086	out of domain	2	0	0	0.6767	out of domain structural outlier	2
136	161	1-PENTANOL	Toluene	000071-41-0	C5H12O	dry/wet	0.51	1.421	0.276	1.163	0.047	0.841	0.536	0.566	0.398	0.814	0.2	0.46	0.31	0.32	0.87	0.19	0.47	0.36	0.47	0.8718	0.0194	1.9	0.0022	out of domain	2	0.8971	89.3	0.0182		0	0.4208	54.5	0.0196		0	0.9246	94.4	0.0188		0
266	161	3-METHYL-1-BUTANOL<ISOPENTANOL>	Toluene	000123-51-3	C5H12O	dry/wet	0.427	1.302	0.068	0.998	-0.19	0.834	0.545	0.565	0.435	0.809	0.21	0.44	0.31	0.34	0.87	0.19	0.37	0.33	0.39	0.8718	0.0194	1.9	0.0022	out of domain	2	0.8374	76.4	0.0078		0	0.296	43.7	0.034		0	0.3558	14.6	0.0213	low similarity	1
296	161	1-HEXANOL	Toluene	000111-27-3	C6H14O	dry/wet	1.29	2.043	0.894	1.779	0.64	0.948	0.56	0.535	0.418	0.942	0.2	0.46	0.31	0.32	1.01	0.19	0.47	0.36	0.47	1.0127	0.0194	1.9	0.0022	out of domain	2	0.8971	89.3	0.0182		0	0.4208	54.5	0.0196		0	0.9246	94.4	0.0188		0
343	161	1-HEPTANOL	Toluene	000111-70-6	C7H16O	dry/wet	1.87	2.665	1.535	2.395	1.281	1.055	0.56	0.569	0.398	1.072	0.2	0.47	0.31	0.32	1.15	0.19	0.47	0.36	0.47	1.1536	0.0194	1.9	0.0022	out of domain	2	0.8971	89.3	0.0182		0	0.4208	54.5	0.0196		0	0.9246	94.4	0.0188		0
43	161	2-CHLOROETHANOL	Toluene	000107-07-3	C2H5ClO	dry/wet	-1.18	-0.137	-1.429	-0.271	-1.074	0.667	0.897	0.719	0.341	0.557	0.33	0.59	0.38	0.31	0.57	0.39	0.68	0.33	0.39	0.5715	0.6874	60.1	0.0087		0	0.6271	43.3	0.0178		0	0.296	43.7	0.034		0	0.3558	14.6	0.0213	low similarity	1
31	161	BENZENE	Toluene	000071-43-2	C6H6	dry/wet	2.638	2.637	2.724	2.629	2.728	1.173	0.598	0.059	0.102	0.674	0.56	0.69	0	0.12	0.72	0.58	0.6	0	0.13	0.7164	0.3858	14.7	0.0092	low similarity	1	0.7874	70.4	0.0024		0	0	0	0	no fragment overlap	0	0.6062	49.6	0.0039		0
161	161	TOLUENE	Toluene	000108-88-3	C7H8	dry/wet	3.136	3.328	3.293	3.301	3.247	1.315	0.606	0.056	0.121	0.802	0.58	0.63	0	0.12	0.86	0.63	0.62	0	0.16	0.8573	0.5953	40.7	0.0035		0	0.8573	81	0.0021		0	0	0	0	no fragment overlap	0	0.7763	79.5	0.0029		0
25	161	ETHYLBENZENE	Toluene	000100-41-4	C8H10	dry/wet	3.653	3.95	3.872	3.916	3.795	1.428	0.614	0.054	0.132	0.928	0.58	0.64	0	0.12	1	0.63	0.48	0	0.17	0.9982	0.5953	40.7	0.0035		0	0.942	96.3	0.011		0	0	0	0	no fragment overlap	0	0.8392	87.5	0.0042		0
322	161	O-XYLENE	Toluene	000095-47-6	C8H10	dry/wet	3.825	4.018	3.761	3.971	3.688	1.444	0.638	0.053	0.151	0.925	0.61	0.58	0	0.12	1	0.62	0.63	0	0.2	0.9982	0.6549	52.8	0.0067		0	0.8244	74.7	0.0044		0	0	0	0	no fragment overlap	0	0.7527	76.2	0.0069		0
471	161	BIPHENYL	Toluene	000092-52-4	C12H10	dry/wet	4.82	5.031	4.633	5.128	4.77	2.339	1.096	0.088	0.267	1.232	1.39	1.16	0	0.21	1.32	1.32	1.07	0	0.27	1.3242	0.5679	35.5	0.0134		0	0.8607	81.2	0.006		0	0	0	0	no fragment overlap	0	0.6182	52.1	0.0119		0
123	161	NAPHTHALENE	Toluene	000091-20-3	C10H8	dry/wet	4.03	4.18	3.973	4.279	4.054	2.055	0.936	0.077	0.202	1.018	1.27	1.02	0	0.17	1.09	1.28	0.93	0	0.18	1.0854	0.4324	18.5	0.0099	low similarity	1	0.7946	71.1	0.0038		0	0	0	0	no fragment overlap	0	0.6351	55.2	0.007		0
1183	161	FLUORANTHENE	Toluene	000206-44-0	C16H10	dry/wet	5.93	6.414	5.674	6.728	5.744	3.527	1.389	0.112	0.37	1.495	2.6	1.52	0	0.25	1.58	2.27	1.53	0	0.32	1.5846	0.1058	2.8	0.3054	out of domain structural outlier	2	0.5354	31.6	0.0121		0	0	0	0	no fragment overlap	0	0.4466	25.9	0.0269		0
927	161	PHENANTHRENE	Toluene	000085-01-8	C14H10	dry/wet	5.472	5.718	5.112	5.922	5.21	3.016	1.258	0.111	0.321	1.357	1.99	1.34	0	0.23	1.45	2.07	1.25	0	0.22	1.4544	0.6251	46.3	0.1686	high leverage	1	0.6533	47.1	0.007		0	0	0	0	no fragment overlap	0	0.6043	49.3	0.011		0
1181	161	9H-FLUORENE	Toluene	000086-73-7	C13H10	dry/wet	5.063	5.463	4.735	5.623	4.839	2.587	1.163	0.082	0.311	1.279	1.65	1.13	0	0.19	1.36	1.69	1.16	0	0.37	1.3565	0.3057	9.5	0.5967	structural outlier	2	0.6605	48.1	0.0851	high leverage	1	0	0	0	no fragment overlap	0	0.4173	22	0.0204	low similarity	1
5441	161	MONURON	Toluene	000150-68-5	C9H11ClN2O	dry/wet	0.97	1.167	2.273	0.631	2.451	2.143	1.361	0.419	0.63	1.382	1.16	1.59	0.37	0.84	1.48	1.29	1.5	0.38	0.84	1.4768	0.7036	62.8	0.0547		0	0.638	45.1	0.0507		0	0.0686	5.8	0.0165	low similarity	1	0.7017	67.8	0.0455		0
130	161	2-METHYLPHENOL(O-CRESOL)	Toluene	000095-48-7	C7H8O	dry/wet	1.136	0.74	0.741	0.684	1.144	1.333	0.944	0.79	0.198	0.86	0.81	0.84	0.5	0.39	0.92	0.76	0.82	0.41	0.34	0.916	0.6328	47.8	0.0089		0	0.7442	61.7	0.003		0	0	0	0.0044	out of domain	2	0.6375	55.6	0.0031		0
49	161	3-METHYLPHENOL(M-CRESOL)	Toluene	000108-39-4	C7H8O	dry/wet	0.786	0.74	0.607	0.684	1.012	1.339	0.971	0.789	0.225	0.862	0.81	0.84	0.5	0.39	0.92	0.77	1.02	0.68	0.32	0.916	0.8215	84.7	0.0094		0	0.7961	71.5	0.0492		0	0.2965	43.9	0.1134	structural outlier	2	0.7551	76.6	0.0034		0
132	161	4-METHYLPHENOL(P-CRESOL)	Toluene	000106-44-5	C7H8O	dry/wet	0.872	0.74	0.649	0.684	1.044	1.333	0.96	0.783	0.222	0.863	0.81	0.84	0.5	0.39	0.92	0.82	0.97	0.53	0.32	0.916	0.7117	63.9	0.0265		0	0.8096	73.2	0.0263		0	0.1056	14.3	0.0437	low similarity	1	0.7551	76.6	0.0034		0
278	161	2,4-DIMETHYLPHENOL	Toluene	000105-67-9	C8H10O	dry/wet	1.255	1.436	1.89	1.362	2.124	1.471	0.961	0.468	0.293	0.987	0.83	0.79	0.5	0.39	1.06	0.83	0.83	0.41	0.36	1.0569	0.9135	96.9	0.0039		0	0.9174	92.6	0.0057		0	0	0	0.0044	out of domain	2	0.8084	84.6	0.0079		0
1206	161	2,5-DIMETHYLPHENOL	Toluene	000095-87-4	C8H10O	dry/wet	1.431	1.436	1.358	1.362	1.699	1.489	0.95	0.769	0.22	0.988	0.83	0.79	0.5	0.39	1.06	0.83	0.83	0.41	0.36	1.0569	0.9135	96.9	0.0039		0	0.9174	92.6	0.0057		0	0	0	0.0044	out of domain	2	0.8084	84.6	0.0079		0
1207	161	3,4-DIMETHYLPHENOL	Toluene	000095-65-8	C8H10O	dry/wet	1.228	1.436	1.125	1.362	1.454	1.456	0.969	0.772	0.261	0.989	0.83	0.79	0.5	0.39	1.06	0.83	0.83	0.41	0.24	1.0569	0.9135	96.9	0.0039		0	0.9174	92.6	0.0057		0	0	0	0.0044	out of domain	2	0.509	35.2	0.2153	high leverage	1
280	161	3,5-DIMETHYLPHENOL	Toluene	000108-68-9	C8H10O	dry/wet	1.292	1.436	1.215	1.362	1.555	1.478	0.965	0.782	0.242	0.992	0.83	0.79	0.5	0.39	1.06	0.83	0.83	0.57	0.34	1.0569	0.7846	78.5	0.0069		0	0.9174	92.6	0.0057		0	0	0	1	out of domain structural outlier	2	0.7723	78.8	0.0101		0
1563	161	4-ETHYLPHENOL	Toluene	000123-07-9	C8H10O	dry/wet	1.279	1.363	1.241	1.301	1.594	1.433	0.957	0.78	0.233	0.991	0.81	0.85	0.5	0.39	1.06	0.78	0.89	0.53	0.33	1.0569	0.9246	97.9	0.0332		0	0.9412	96.3	0.0253		0	0.1056	14.3	0.0437	low similarity	1	0.8409	87.7	0.0049		0
810	161	O-CHLOROPHENOL	Toluene	000095-57-8	C6H5ClO	dry/wet	1.369	1.638	2.186	1.629	2.418	1.361	0.828	0.402	0.16	0.859	0.84	0.84	0.33	0.3	0.9	0.87	0.89	0.41	0.27	0.8975	0.7172	65.2	0.0102		0	0.6552	47.3	0.0025		0	0	0	0.0044	out of domain	2	0.5931	47.9	0.0018		0
811	161	M-CHLOROPHENOL	Toluene	000108-43-0	C6H5ClO	dry/wet	1.049	0.338	0.611	0.539	1.125	1.371	0.972	0.937	0.139	0.866	0.91	0.97	0.69	0.33	0.9	0.88	1.08	0.68	0.25	0.8975	0.7602	73.8	0.0104		0	0.8541	79.6	0.0485		0	0.2965	43.9	0.1134	structural outlier	2	0.71	68.9	0.0027		0
812	161	P-CHLOROPHENOL	Toluene	000106-48-9	C6H5ClO	dry/wet	1.079	0.157	0.486	0.294	1.019	1.361	1.006	0.93	0.163	0.866	0.94	1.01	0.67	0.38	0.9	0.92	0.92	0.53	0.25	0.8975	0.7256	66.6	0.0271		0	0.7361	60.3	0.0452		0	0.1056	14.3	0.0437	low similarity	1	0.71	68.9	0.0027		0
809	161	GUAIACOL	Toluene	000090-05-1	C7H8O2	dry/wet	1.26	1.183	1.659	0.904	1.957	1.346	1.017	0.373	0.316	0.921	0.77	0.96	0.27	0.47	0.97	0.88	0.88	0.41	0.49	0.9747	0.652	51.8	0.0852		0	0.5815	36.9	0.0059		0	0	0	0.0044	out of domain	2	0.8699	90.1	0.0053		0
608	161	3-NITROPHENOL	Toluene	000554-84-7	C6H5NO3	dry/wet	0.342	-0.47	-0.77	-0.327	-0.115	1.309	1.252	1.042	0.362	0.92	1.05	1.47	0.69	0.49	0.95	1.01	1.48	0.68	0.39	0.9493	0.791	79.8	0.0125		0	0.5722	35.8	0.0515		0	0.2965	43.9	0.1134	structural outlier	2	0.6693	61.1	0.0063		0
619	161	4-NITROPHENOL	Toluene	000100-02-7	C6H5NO3	dry/wet	-0.06	-0.41	-1.152	-0.278	-0.475	1.371	1.323	1.081	0.413	0.92	1.05	1.47	0.67	0.49	0.95	1.06	1.57	0.53	0.39	0.9493	0.6963	61.7	0.0299		0	0.5353	31.6	0.095	high leverage	1	0.1056	14.3	0.0437	low similarity	1	0.6693	61.1	0.0063		0
50026	161	1-Naphthol	Toluene	000090-15-3	C10H8O1	dry/wet	1.797	1.592	1.561	1.663	1.96	2.066	1.131	0.863	0.243	1.081	1.5	1.23	0.5	0.45	1.14	1.46	1.31	0.41	0.35	1.1441	0.7822	78.1	0.0086		0	0.5044	28.4	0.1128	high leverage	1	0	0	0.0044	out of domain	2	0.5005	33.9	0.0048		0
857	161	2-NITROANILINE	Toluene	000088-74-4	C6H6N2O2	dry/wet	1.651	1.354	0.292	1.207	0.45	1.601	1.082	0.602	0.485	0.932	1.16	1.44	0.18	0.48	0.99	1.17	1.49	0.13	0.47	0.9904	0.8543	91	0.0157		0	0.5068	28.8	0.0097		0	0	0	0.1135	out of domain structural outlier	2	0.6193	52.5	0.0109		0
859	161	4-NITROANILINE	Toluene	000100-01-6	C6H6N2O2	dry/wet	0.813	0.655	-0.885	0.564	-0.479	1.614	1.318	0.843	0.559	0.947	1.13	1.65	0.28	0.53	0.99	1.2	1.62	0.27	0.45	0.9904	0.734	68.5	0.0114		0	0.4809	26.1	0.0786		0	0	0	0.012	out of domain	2	0.6066	49.7	0.0106		0
817	161	1,3-BENZENEDIOL	Toluene	000108-46-3	C6H6O2	dry/wet	-2.17	-2.268	-2.897	-2.254	-2.012	1.205	1.259	1.684	0.275	0.798	0.99	1.1	1	0.61	0.83	0.92	1.41	1.36	0.45	0.8338	0.7173	65.2	0.0177		0	0.5819	36.9	0.1928	structural outlier	2	0	0	0.4535	out of domain structural outlier	2	0.6223	53.1	0.0054		0
17	161	ANILINE	Toluene	000062-53-3	C6H7N	dry/wet	0.89	0.769	0.75	0.578	1.039	1.357	0.985	0.475	0.297	0.762	0.86	1.08	0.23	0.43	0.82	0.94	1.01	0.27	0.35	0.8162	0.6208	45.7	0.011		0	0.6716	49.8	0.0071		0	0	0	0.012	out of domain	2	0.7438	73.9	0.007		0
29	161	BENZONITRILE	Toluene	000100-47-0	C7H5N	dry/wet	2.193	2.386	1.647	2.332	1.779	1.345	1.004	0.09	0.412	0.831	0.73	1.17	0	0.26	0.87	0.8	1.09	0.02	0.27	0.8711	0.5502	32.3	0.0148		0	0.6263	43.2	0.0117		0	0.9039	93.9	0.0182		0	0.5484	41.5	0.0197		0
766	161	1,2-BENZENEDIOL	Toluene	000120-80-9	C6H6O2	dry/wet	-1.26	-1.249	-1.156	-1.267	-0.468	1.206	1.08	1.274	0.192	0.793	0.93	1.08	0.77	0.53	0.83	0.91	1.01	0.82	0.47	0.8338	0.6291	47.1	0.018		0	0.6211	42.2	0.0074		0	0	0	0.0175	out of domain	2	0.6866	64.6	0.005		0
1642	161	P-HYDROQUINONE	Toluene	000123-31-9	C6H6O2	dry/wet	-2.149	-2.504	-2.9	-2.542	-2.189	1.183	1.211	1.553	0.365	0.801	1.02	1.14	1	0.65	0.83	0.98	1.32	1.06	0.45	0.8338	0.5593	34	0.1052		0	0.5116	29.1	0.1012	high leverage	1	0	0	0.1747	out of domain structural outlier	2	0.6223	53.1	0.0054		0
2046	161	CYCLOHEXANONEOXIME	Toluene	000100-64-1	C6H11NO	dry/wet	0.308	1.414	0.349	0.996	0.304	1.097	0.777	0.591	0.446	0.906	0.58	0.42	0.31	0.45	0.96	0.68	0.42	0.31	0.4	0.9609	0.5585	33.7	0.0207		0	0.278	8.8	0.0416	low similarity	1	0	0	0.0086	out of domain	2	0.3357	13	0.0025	low similarity	1
630	161	O-METHYLANILINE	Toluene	000095-53-4	C7H9N	dry/wet	1.48	1.458	1.482	1.248	1.704	1.49	0.989	0.403	0.32	0.885	0.88	1.02	0.23	0.43	0.96	0.93	1.03	0.13	0.4	0.9571	0.8483	89.8	0.0124		0	0.6939	53	0.0074		0	0	0	0.1135	out of domain structural outlier	2	0.7469	75	0.0077		0
1168	161	P-METHYLANILINE	Toluene	000106-49-0	C7H9N	dry/wet	1.33	1.458	1.4	1.248	1.61	1.5	0.979	0.44	0.323	0.892	0.88	1.02	0.23	0.43	0.96	0.96	1.03	0.27	0.38	0.9571	0.6645	54.2	0.0091		0	0.6939	53	0.0074		0	0	0	0.012	out of domain	2	0.6953	66.5	0.0078		0
3342	161	2,2-BIS(4-HYDROXYPHENYL)PROPANE	Toluene	000080-05-7	C15H16O2	dry/wet	1.076	1.57	0.361	1.476	1.079	2.499	1.726	1.558	0.628	1.73	1.59	1.46	1	0.79	1.86	1.59	1.78	1.06	0.69	1.8643	0.4967	25.8	0.139	high leverage	1	0.4919	27	0.1012	high leverage	1	0	0	0.1747	out of domain structural outlier	2	0	0	0.0803	out of domain	2
85	161	FURFURAL	Toluene	000098-01-1	C5H4O2	dry/wet	0.613	0.726	0.049	0.348	0.3	1.039	1.13	0.137	0.529	0.69	0.6	1.06	0	0.44	0.69	0.56	0.95	0	0.44	0.6929	0.4025	15.8	0.0269	low similarity	1	0.6997	54.3	0.0327		0	0	0	0	no fragment overlap	0	0.467	28.6	0.03		0
4152	161	8-HYDROXYQUINOLINE	Toluene	000148-24-3	C9H7NO	dry/wet	2.25	1.248	2.652	0.686	2.839	1.965	1.13	0.219	0.37	1.041	1.55	1.36	0.07	0.73	1.1	1.4	1.36	0.41	0.6	1.103	0.9045	96.5	0.0439		0	0.4288	20.6	0.1154	high leverage low similarity	1	0	0	0.0044	out of domain	2	0.7496	75.8	0.0529		0
446	161	CHLOROTRIFLUOROMETHANE	Toluene	000075-72-9	CClF3	dry/wet	1.953	1.861	2.832	1.74	2.53	0.221	-0.025	0.066	-0.094	0.506	-0.24	0.12	0	0	0.42	-0.24	0.05	0	0	0.425	0.5076	27.4	0.0703		0	0.5444	32.6	0.0153		0	0	0	0	no fragment overlap	0	0	0	0	no fragment overlap	0
245	161	DICHLORODIFLUOROMETHANE[R12]	Toluene	000075-71-8	CCl2F2	dry/wet	2.154	2.351	3.131	2.305	2.845	0.456	0.06	0.071	-0.068	0.589	-0.02	0.26	0	0	0.53	0	0.3	0	0	0.5297	0.6278	46.9	0.1036		0	0.5926	38.2	0.0015		0	0	0	0	no fragment overlap	0	0	0	0	no fragment overlap	0
40055	161	Nicotine	Toluene	000054-11-5	C10H14N2	dry/wet	0.86	1.778	1.864	0.716	1.115	1.685	0.748	0.129	0.844	1.283	1.01	1.03	0	0.91	1.37	0.86	1.34	0	1.22	1.371	0.239	5.9	0.0345	low similarity	1	0.5582	33.9	0.0116		0	0	0	0	no fragment overlap	0	0.5526	42	0.1783	high leverage	1
1051	89	METHANE	Hexane	000074-82-8	CH4	dry/wet	1.436	1.075	1.466	0.978	1.384	0.516	0.15	0.035	-0.042	0.228	0.11	0.21	0	0.01	0.25	0	0	0	0	0.2495	0	0	0	no fragment overlap	0	0	0	0	no fragment overlap	0	0	0	0	no fragment overlap	0	0	0	0	no fragment overlap	0
316	89	2-METHYLPROPANE	Hexane	000075-28-5	C4H10	dry/wet	3.41	2.695	3.321	2.613	3.354	0.773	0.127	0.044	-0.043	0.618	0.01	0.17	0	0.06	0.67	0	0	0	0	0.6722	0	0	0	no fragment overlap	0	0	0	0	no fragment overlap	0	0	0	0	no fragment overlap	0	0	0	0	no fragment overlap	0
134	89	PENTANE	Hexane	000109-66-0	C5H12	dry/wet	4.14	3.385	4.04	3.387	4.12	0.876	0.106	0.049	-0.06	0.747	0	0.19	0	0.04	0.81	0	0	0	0	0.8131	0	0	0	no fragment overlap	0	0	0	0	no fragment overlap	0	0	0	0	no fragment overlap	0	0	0	0	no fragment overlap	0
468	89	NEOPENTANE	Hexane	000463-82-1	C5H12	dry/wet	3.83	3.325	3.638	3.257	3.643	0.874	0.129	0.052	0.008	0.741	-0.01	0.12	0	0.07	0.81	0	0	0	0	0.8131	0	0	0	no fragment overlap	0	0	0	0	no fragment overlap	0	0	0	0	no fragment overlap	0	0	0	0	no fragment overlap	0
89	89	HEXANE	Hexane	000110-54-3	C6H14	dry/wet	4.79	3.975	4.626	4.015	4.732	0.98	0.097	0.055	-0.055	0.875	0	0.19	0	0.04	0.95	0	0	0	0	0.954	0	0	0	no fragment overlap	0	0	0	0	no fragment overlap	0	0	0	0	no fragment overlap	0	0	0	0	no fragment overlap	0
370	89	2,2-DIMETHYLBUTANE	Hexane	000075-83-2	C6H14	dry/wet	4.51	3.914	4.103	3.884	4.114	0.961	0.123	0.058	0.03	0.863	-0.02	0.12	0	0.08	0.95	0	0	0	0	0.954	0	0	0	no fragment overlap	0	0	0	0	no fragment overlap	0	0	0	0	no fragment overlap	0	0	0	0	no fragment overlap	0
91	89	HEPTANE	Hexane	000142-82-5	C7H16	dry/wet	5.46	4.564	5.17	4.641	5.322	1.105	0.122	0.055	-0.049	1	0	0.2	0	0.05	1.09	0	0	0	0	1.0949	0	0	0	no fragment overlap	0	0	0	0	no fragment overlap	0	0	0	0	no fragment overlap	0	0	0	0	no fragment overlap	0
74	89	2,4-DIMETHYLPENTANE	Hexane	000108-08-7	C7H16	dry/wet	5.29	4.364	4.803	4.348	4.867	1.061	0.115	0.06	0.017	0.995	0.02	0.16	0	0.1	1.09	0	0	0	0	1.0949	0	0	0	no fragment overlap	0	0	0	0	no fragment overlap	0	0	0	0	no fragment overlap	0	0	0	0	no fragment overlap	0
128	89	OCTANE	Hexane	000111-65-9	C8H18	dry/wet	6.08	5.155	5.827	5.269	6.04	1.191	0.126	0.058	-0.057	1.135	0	0.2	0	0.05	1.24	0	0	0	0	1.2358	0	0	0	no fragment overlap	0	0	0	0	no fragment overlap	0	0	0	0	no fragment overlap	0	0	0	0	no fragment overlap	0
1283	89	2,5-DIMETHYLHEXANE	Hexane	000592-13-2	C8H18	dry/wet	5.66	4.954	5.43	4.975	5.563	1.155	0.133	0.062	0.01	1.128	0.02	0.17	0	0.1	1.24	0	0	0	0	1.2358	0	0	0	no fragment overlap	0	0	0	0	no fragment overlap	0	0	0	0	no fragment overlap	0	0	0	0	no fragment overlap	0
398	89	NONANE	Hexane	000111-84-2	C9H20	dry/wet	6.66	5.74	6.361	5.89	6.617	1.328	0.153	0.058	-0.05	1.258	-0.01	0.2	0	0.05	1.38	0	0	0	0	1.3767	0	0	0	no fragment overlap	0	0	0	0	no fragment overlap	0	0	0	0	no fragment overlap	0	0	0	0	no fragment overlap	0
2224	89	3,3-DIETHYLPENTANE	Hexane	001067-20-5	C9H20	dry/wet	5.94	5.682	5.34	5.765	5.438	1.219	0.206	0.056	0.105	1.227	-0.02	0.14	0	0.09	1.38	0	-0.45	0	0	1.3767	0	0	0	no fragment overlap	0	0	0	0.2013	out of domain structural outlier	2	0	0	0	no fragment overlap	0	0	0	0	no fragment overlap	0
1693	89	CYCLOPROPANE	Hexane	000075-19-4	C3H6	dry/wet	2	1.824	1.895	1.82	1.928	0.657	0.3	0.037	0.018	0.435	0.22	0.27	0	0.01	0.42	0.17	0	0	0	0.4227	0.6481	51.2	0.0383		0	0	0	0	no fragment overlap	0	0	0	0	no fragment overlap	0	0	0	0	no fragment overlap	0
401	89	ETHYLCYCLOHEXANE	Hexane	001678-91-7	C8H16	dry/wet	5.55	4.668	5.091	4.803	5.227	1.189	0.18	0.044	-0.003	1.035	0.22	0.27	0	0.05	1.13	0.26	0.18	0	0	1.1272	0.6786	58.3	0.003		0	0.5193	29.6	0.0021		0	0	0	0	no fragment overlap	0	0	0	0	no fragment overlap	0
1053	89	ETHYLENE	Hexane	000074-85-1	C2H4	dry/wet	1.411	1.274	1.327	1.11	1.333	0.621	0.325	0.044	0.022	0.329	0.1	0.19	0	0.07	0.35	0.12	0.11	0	0.07	0.3474	0.5931	40.1	0.0018		0	0.3517	14.4	0.0009	low similarity	1	0	0	0	no fragment overlap	0	0.6727	62.8	0.002		0
1055	89	PROPYLENE	Hexane	000115-07-1	C3H6	dry/wet	2.256	1.75	1.923	1.614	1.959	0.74	0.33	0.039	0.029	0.456	0.13	0.24	0	0.08	0.49	0.12	0.11	0	0.07	0.4883	0.5931	40.1	0.0018		0	0.3517	14.4	0.0009	low similarity	1	0	0	0	no fragment overlap	0	0.6727	62.8	0.002		0
368	89	1-BUTENE	Hexane	000106-98-9	C4H8	dry/wet	2.826	2.339	2.551	2.24	2.613	0.849	0.318	0.041	0.031	0.585	0.13	0.24	0	0.09	0.63	0.12	0.11	0	0.07	0.6292	0.5931	40.1	0.0018		0	0.3517	14.4	0.0009	low similarity	1	0	0	0	no fragment overlap	0	0.6727	62.8	0.002		0
457	89	ISOBUTYLENE	Hexane	000115-11-7	C4H8	dry/wet	2.64	2.349	2.375	2.212	2.419	0.859	0.34	0.043	0.055	0.58	0.11	0.18	0	0.1	0.63	0.18	0.11	0	0.07	0.6292	0.4198	17.1	0.0718	low similarity	1	0.3517	14.4	0.0009	low similarity	1	0	0	0	no fragment overlap	0	0.6727	62.8	0.002		0
1064	89	ETHYNE	Hexane	000074-86-2	C2H2	dry/wet	0.38	0.255	-0.231	0.236	-0.04	0.508	0.582	0.226	0.082	0.304	0.36	0.39	0.17	0.07	0.3	0.15	0.24	0.05	0.05	0.3044	0.8229	85	0.0332		0	0.7665	67.2	0.0115		0	0.2134	32.2	0.011		0	0.4484	26.2	0.0202		0
1014	89	TETRAFLUOROMETHANE[R14]	Hexane	000075-73-0	CF4	dry/wet	1.926	1.53	2.781	1.315	2.851	-0.006	-0.061	0.046	-0.133	0.426	-0.47	-0.03	0	0	0.32	-0.49	-0.42	0	0	0.3203	0.6313	47.7	0.2027	high leverage	1	0.0106	0.1	0.2389	out of domain structural outlier	2	0	0	0	no fragment overlap	0	0	0	0	no fragment overlap	0
47	89	CHLOROFORM	Hexane	000067-66-3	CHCl3	dry/wet	1.86	1.956	2.022	2.124	2.347	0.81	0.521	0.172	0.005	0.629	0.34	0.48	0.12	0	0.62	0.39	0.45	0	0	0.6167	0.6073	43.5	0.0197		0	0.578	36.6	0.0035		0	0	0	0	no fragment overlap	0	0	0	0	no fragment overlap	0
157	89	TETRACHLOROMETHANE	Hexane	000056-23-5	CCl4	dry/wet	3.22	2.865	3.516	3.047	3.697	0.926	0.298	0.067	-0.016	0.759	0.42	0.55	0	0	0.74	0.52	0.6	0	0	0.7391	0.4857	24.2	0.0349	low similarity	1	0.6167	41.8	0.0062		0	0	0	0	no fragment overlap	0	0	0	0	no fragment overlap	0
332	89	1-CHLOROPROPANE	Hexane	000540-54-5	C3H7Cl	dry/wet	2.23	2.568	2.105	2.577	2.222	0.8	0.451	0.051	0.094	0.619	0.13	0.32	0	0.03	0.65	0.2	0.32	0	0	0.6537	0.7377	69.2	0.0066		0	0.7947	71.2	0.0103		0	0	0	0	no fragment overlap	0	0	0	0	no fragment overlap	0
696	89	1,3-DICHLOROPROPANE	Hexane	000142-28-9	C3H6Cl2	dry/wet	1.86	2.923	1.253	3.012	1.62	0.937	0.876	0.112	0.209	0.75	0.25	0.46	0	0.03	0.78	0.4	0.87	0	0.17	0.7761	0.8448	89.1	0.0265		0	0.794	71.1	0.1601	high leverage	1	0	0	0	no fragment overlap	0	0.4023	20.3	0.1678	high leverage low similarity	1
219	89	TERT-BUTYLCHLORIDE	Hexane	000507-20-0	C4H9Cl	dry/wet	3.31	3.1	2.326	3.077	2.381	0.89	0.45	0.056	0.17	0.745	0.11	0.26	0	0.07	0.79	0.13	0.15	0	0	0.7946	0.5558	33.3	0.0022		0	0.4394	21.7	0.0004	low similarity	1	0	0	0	no fragment overlap	0	0	0	0	no fragment overlap	0
30856	89	ETHYLBROMIDE	Hexane	000074-96-4	C2H5Br	dry/wet	1.762	2.163	1.61	2.202	1.707	0.817	0.494	0.055	0.103	0.533	0.31	0.4	0	0.03	0.57	0.34	0.39	0	0.09	0.5654	0.8018	81.2	0.019		0	0.9742	99	0.0263		0	0	0	0	no fragment overlap	0	0.8791	91	0.0371		0
410	89	2-BROMO-2-METHYLPROPANE	Hexane	000507-19-7	C4H9Br	dry/wet	3.35	3.29	2.417	3.335	2.532	1.045	0.548	0.048	0.175	0.783	0.29	0.34	0	0.07	0.85	0.3	0.25	0	0	0.8472	0.5525	32.9	0.018		0	0.6782	51	0.0086		0	0	0	0	no fragment overlap	0	0	0	0	no fragment overlap	0
1946	89	1,2-DIFLUORO-1,1,2,2-TETRACHLOROETHANE	Hexane	000076-12-0	C2Cl4F2	dry/wet	3.89	3.426	4.304	3.52	4.505	0.806	0.213	0.086	0.011	0.968	0.42	0.45	0	0.08	0.92	0.38	0.16	0	0	0.9154	0.7581	73.3	0.1883	high leverage	1	0.453	23.2	0.1116	high leverage low similarity	1	0	0	0	no fragment overlap	0	0	0	0	no fragment overlap	0
580	89	DIMETHYLETHER	Hexane	000115-10-6	C2H6O	dry/wet	-0.087	0.62	0.451	0.191	0.261	0.572	0.432	0.018	0.271	0.428	0.05	0.33	0	0.24	0.45	0	0.28	0	0.24	0.4491	0	0	0	no fragment overlap	0	0.7078	55.3	0.0125		0	0	0	0	no fragment overlap	0	0.2	5	0.014	low similarity	1
57	89	DIBUTYLETHER	Hexane	000142-96-1	C8H18O	dry/wet	3.644	4.153	4.199	3.947	4.227	1.189	0.394	0.035	0.266	1.202	0.04	0.35	0	0.26	1.29	0	0.18	0	0.41	1.2945	0	0	0	no fragment overlap	0	0.7709	68	0.0121		0	0	0	0	no fragment overlap	0	0.7666	78.4	0.0424		0
876	89	METHYLTERT-AMYLETHER	Hexane	000994-05-8	C6H14O	dry/wet	1.68	2.917	2.272	2.568	2.088	0.912	0.402	0.048	0.376	0.93	0.02	0.28	0	0.29	1.01	0	0.14	0	0.22	1.0127	0	0	0	no fragment overlap	0	0.6134	41.2	0.0031		0	0	0	0	no fragment overlap	0	0	0	0.0035	out of domain	2
4	89	ACETONE	Hexane	000067-64-1	C3H6O	dry/wet	-0.867	0.103	-0.74	-0.386	-0.95	0.63	0.712	0.046	0.485	0.515	0.22	0.67	0	0.34	0.55	0.12	0.64	0	0.5	0.547	0.5931	40.1	0.0018		0	0.6565	47.5	0.0268		0	0	0	0	no fragment overlap	0	0.334	13	0.0452	low similarity	1
40	89	2-BUTANONE	Hexane	000078-93-3	C4H8O	dry/wet	-0.23	0.693	0.115	0.242	-0.051	0.692	0.668	0.033	0.461	0.649	0.21	0.67	0	0.34	0.69	0.12	0.63	0	0.48	0.6879	0.5931	40.1	0.0018		0	0.891	87.7	0.0084		0	0	0	0	no fragment overlap	0	0.4432	25.5	0.0579		0
616	89	METHYLBUTYLKETONE	Hexane	000591-78-6	C6H12O	dry/wet	1.02	1.872	1.291	1.496	1.206	0.903	0.681	0.035	0.467	0.905	0.21	0.68	0	0.35	0.97	0.12	0.63	0	0.5	0.9697	0.5931	40.1	0.0018		0	0.891	87.7	0.0084		0	0	0	0	no fragment overlap	0	0.9604	99	0.0156		0
92	89	2-HEPTANONE	Hexane	000110-43-0	C7H14O	dry/wet	1.679	2.461	1.877	2.122	1.846	1.022	0.696	0.039	0.463	1.029	0.21	0.69	0	0.35	1.11	0.08	0.63	0	0.5	1.1106	0.3755	14	0.0344	low similarity	1	0.891	87.7	0.0084		0	0	0	0	no fragment overlap	0	0.9604	99	0.0156		0
662	89	3,3-DIMETHYL-2-BUTANONE	Hexane	000075-97-8	C6H12O	dry/wet	0.901	1.815	1.047	1.371	0.861	0.88	0.639	0.039	0.514	0.89	0.2	0.62	0	0.38	0.97	0.12	0.47	0	0.39	0.9697	0.5931	40.1	0.0018		0	0.7539	63.8	0.0068		0	0	0	0	no fragment overlap	0	0.5731	45.1	0.0115		0
250	89	CYCLOHEXANONE	Hexane	000108-94-1	C6H10O	dry/wet	0.05	1.485	0.635	1.177	0.457	0.931	0.735	0.002	0.526	0.809	0.42	0.77	0	0.32	0.86	0.5	0.81	0	0.51	0.8611	0	0	0.0629	out of domain	2	0.6653	49.1	0.0098		0	0	0	0	no fragment overlap	0	0.7542	76.5	0.0303		0
82	89	METHYLACETATE	Hexane	000079-20-9	C3H6O2	dry/wet	-0.154	0.329	-0.355	-0.226	-0.428	0.57	0.757	0.044	0.446	0.585	0.07	0.57	0	0.36	0.61	0.11	0.61	0	0.4	0.6057	0.631	47.6	0.0298		0	0.6969	53.3	0.0096		0	0	0	0	no fragment overlap	0	0.5298	38.1	0.0225		0
21	89	ETHYLACETATE	Hexane	000141-78-6	C4H8O2	dry/wet	0.48	0.915	0.262	0.395	0.186	0.667	0.735	0.033	0.464	0.716	0.07	0.58	0	0.36	0.75	0.07	0.62	0	0.48	0.7466	0.8503	90.3	0.0205		0	0.7051	54.7	0.0219		0	0	0	0	no fragment overlap	0	0.7374	72.8	0.0319		0
80	89	BUTYLACETATE	Hexane	000123-86-4	C6H12O2	dry/wet	1.684	2.089	1.668	1.644	1.686	0.85	0.703	0.033	0.437	0.973	0.06	0.59	0	0.37	1.03	0.07	0.57	0	0.46	1.0284	0.8503	90.3	0.0205		0	0.9448	96.5	0.0095		0	0	0	0	no fragment overlap	0	0.8152	85.1	0.0324		0
400	89	METHYLPROPIONATE	Hexane	000554-12-1	C4H8O2	dry/wet	0.522	0.915	0.219	0.395	0.137	0.653	0.734	0.033	0.469	0.713	0.07	0.58	0	0.36	0.75	0.09	0.6	0	0.44	0.7466	0.4929	25.2	0.0079		0	0.9361	95.5	0.0047		0	0	0	0	no fragment overlap	0	0.4969	33.4	0.0519		0
216	89	METHYLPENTANOATE	Hexane	000624-24-8	C6H12O2	dry/wet	1.733	2.089	1.586	1.644	1.629	0.87	0.744	0.032	0.439	0.969	0.06	0.59	0	0.37	1.03	0.09	0.6	0	0.46	1.0284	0.4929	25.2	0.0079		0	0.9361	95.5	0.0047		0	0	0	0	no fragment overlap	0	0.9413	96.8	0.0122		0
686	89	METHYLCAPROATE	Hexane	000106-70-7	C7H14O2	dry/wet	2.309	2.68	2.172	2.272	2.267	0.997	0.764	0.032	0.438	1.094	0.06	0.59	0	0.37	1.17	0.05	0.6	0	0.46	1.1693	0.411	16.5	0.0404	low similarity	1	0.9361	95.5	0.0047		0	0	0	0	no fragment overlap	0	0.9413	96.8	0.0122		0
3	89	ACETONITRILE	Hexane	000075-05-8	C2H3N	dry/wet	-1.08	0.015	-1.459	-0.288	-1.49	0.504	0.837	0.106	0.417	0.391	0.19	0.72	0	0.2	0.4	0.17	0.56	0.05	0.18	0.4042	0.8597	91.7	0.0113		0	0.2974	9.7	0.0109	low similarity	1	0.2134	32.2	0.011		0	0.4544	26.8	0.0194		0
326	89	PROPIONITRILE	Hexane	000107-12-0	C3H5N	dry/wet	-0.595	0.606	-0.586	0.339	-0.652	0.598	0.767	0.06	0.422	0.519	0.19	0.73	0	0.2	0.55	0.17	0.56	0.05	0.3	0.5451	0.8597	91.7	0.0113		0	0.2974	9.7	0.0109	low similarity	1	0.2134	32.2	0.011		0	0.7429	73.4	0.0382		0
956	89	BUTYRONITRILE	Hexane	000109-74-0	C4H7N	dry/wet	0.078	1.195	0.054	0.966	0.017	0.702	0.763	0.051	0.427	0.649	0.19	0.73	0	0.21	0.69	0.17	0.56	0	0.3	0.686	0.8597	91.7	0.0113		0	0.2974	9.7	0.0109	low similarity	1	1	95.7	0.0385		0	0.7429	73.4	0.0382		0
1145	89	VALERONITRILE	Hexane	000110-59-8	C5H9N	dry/wet	0.68	1.785	0.667	1.593	0.674	0.807	0.768	0.051	0.426	0.777	0.18	0.73	0	0.21	0.83	0.17	0.91	0	0.3	0.8269	0.8597	91.7	0.0113		0	0.9818	99.6	0.0774		0	1	95.7	0.0385		0	0.7429	73.4	0.0382		0
178	89	METHYLAMINE	Hexane	000074-89-5	CH5N	dry/wet	-2.138	-2.321	-1.605	-3.18	-2.078	0.571	0.359	0.279	0.435	0.322	0.21	0.49	0.21	0.57	0.35	0.26	0.32	0.27	0.26	0.3493	0.558	33.7	0.0112		0	0.6992	53.5	0.0019		0	0	0	0.012	out of domain	2	0.1311	1.3	0.0062	out of domain	2
320	89	ETHYLAMINE	Hexane	000075-04-7	C2H7N	dry/wet	-1.62	-1.731	-1.105	-2.553	-1.567	0.674	0.366	0.276	0.46	0.451	0.21	0.49	0.21	0.57	0.49	0.26	0.32	0.17	0.56	0.4902	0.558	33.7	0.0112		0	0.6992	53.5	0.0019		0	0.8347	87.5	0.0271		0	0.7619	77.9	0.0238		0
377	89	PROPYLAMINE	Hexane	000107-10-8	C3H9N	dry/wet	-0.96	-1.141	-0.305	-1.925	-0.713	0.752	0.333	0.276	0.433	0.582	0.2	0.5	0.21	0.58	0.63	0.26	0.32	0.17	0.56	0.6311	0.558	33.7	0.0112		0	0.6992	53.5	0.0019		0	0.8347	87.5	0.0271		0	0.7619	77.9	0.0238		0
179	89	DIMETHYLAMINE	Hexane	000124-40-3	C2H7N	dry/wet	-1.329	-0.736	-0.09	-1.446	-0.456	0.668	0.311	0.179	0.343	0.455	0.16	0.34	0.13	0.47	0.49	0.17	0.32	0.21	0.53	0.4902	0.2386	5.8	0.0025	low similarity	1	0.6992	53.5	0.0019		0	0.0009	0.3	0.3082	out of domain structural outlier	2	0.2127	5.5	0.1791	high leverage low similarity	1
61	89	DIETHYLAMINE	Hexane	000109-89-7	C4H11N	dry/wet	-0.37	0.439	1.435	-0.198	1.168	0.867	0.277	0.165	0.308	0.716	0.15	0.35	0.13	0.48	0.77	0.17	0.32	0.02	0.59	0.772	0.2386	5.8	0.0025	low similarity	1	0.6992	53.5	0.0019		0	0.3635	48.3	0.4003	structural outlier	2	0.3023	10.8	0.0392	low similarity	1
533	89	TRIMETHYLAMINE	Hexane	000075-50-3	C3H9N	dry/wet	-0.424	0.088	1.364	-0.735	1.092	0.798	0.283	0.066	0.264	0.581	0.17	0.36	0	0.53	0.63	0.17	0.32	0	0.62	0.6311	0.2386	5.8	0.0025	low similarity	1	0.6992	53.5	0.0019		0	0	0	0	no fragment overlap	0	0.3054	11	0.2454	high leverage low similarity	1
126	89	1-NITROPROPANE	Hexane	000108-03-2	C3H7NO2	dry/wet	0.52	1.139	0.355	0.857	0.499	0.675	0.826	0.071	0.351	0.68	0.22	0.72	0	0.25	0.71	0.24	0.54	0	0.29	0.7055	0.7412	70.2	0.0041		0	0.1849	3.8	0.0036	out of domain	2	0	0	0	no fragment overlap	0	0.8163	85.2	0.0793		0
1042	89	1-NITROBUTANE	Hexane	000627-05-4	C4H9NO2	dry/wet	1.131	1.725	0.782	1.48	1.001	0.786	0.872	0.095	0.355	0.806	0.22	0.72	0	0.25	0.85	0.24	0.54	0	0.29	0.8464	0.7412	70.2	0.0041		0	0.1849	3.8	0.0036	out of domain	2	0	0	0	no fragment overlap	0	0.8163	85.2	0.0793		0
110	89	METHANOL	Hexane	000067-56-1	CH4O	dry/wet	-2.592	-1.511	-2.939	-1.881	-3.104	0.473	0.549	0.586	0.378	0.295	0.21	0.44	0.31	0.3	0.31	0.19	0.28	0.31	0.2	0.3082	0.0194	1.9	0.0022	out of domain	2	0.2446	7.5	0.0017	low similarity	1	0	0	0.0086	out of domain	2	0	0	0.0014	out of domain	2
11	89	ETHANOL	Hexane	000064-17-5	C2H6O	dry/wet	-1.998	-0.921	-2.255	-1.253	-2.423	0.564	0.522	0.562	0.391	0.424	0.21	0.45	0.31	0.31	0.45	0.19	0.37	0.33	0.33	0.4491	0.0194	1.9	0.0022	out of domain	2	0.8374	76.4	0.0078		0	0.296	43.7	0.034		0	0.3233	12.3	0.0151	low similarity	1
140	89	1-PROPANOL	Hexane	000071-23-8	C3H8O	dry/wet	-1.349	-0.332	-1.613	-0.628	-1.748	0.643	0.538	0.528	0.406	0.556	0.21	0.45	0.31	0.31	0.59	0.19	0.37	0.33	0.39	0.59	0.0194	1.9	0.0022	out of domain	2	0.8374	76.4	0.0078		0	0.296	43.7	0.034		0	0.3558	14.6	0.0213	low similarity	1
95	89	2-PROPANOL	Hexane	000067-63-0	C3H8O	dry/wet	-1.46	-0.432	-1.613	-0.774	-1.789	0.654	0.524	0.513	0.422	0.554	0.22	0.43	0.31	0.34	0.59	0.19	0.28	0.31	0.42	0.59	0.0194	1.9	0.0022	out of domain	2	0.2446	7.5	0.0017	low similarity	1	0	0	0.0086	out of domain	2	0	0	0.1444	out of domain	2
39	89	1-BUTANOL	Hexane	000071-36-3	C4H10O	dry/wet	-0.718	0.258	-1.134	0	-1.24	0.75	0.524	0.567	0.409	0.682	0.2	0.46	0.31	0.31	0.73	0.19	0.37	0.36	0.47	0.7309	0.0194	1.9	0.0022	out of domain	2	0.8374	76.4	0.0078		0	0.4208	54.5	0.0196		0	0.9246	94.4	0.0188		0
22	89	2-BUTANOL	Hexane	000078-92-2	C4H10O	dry/wet	-0.783	0.158	-0.686	-0.147	-0.749	0.743	0.517	0.503	0.365	0.682	0.21	0.44	0.31	0.34	0.73	0.19	0.28	0.31	0.51	0.7309	0.0194	1.9	0.0022	out of domain	2	0.2446	7.5	0.0017	low similarity	1	0	0	0.0086	out of domain	2	0.7584	77.3	0.0354		0
120	89	2-METHYL-1-PROPANOL	Hexane	000078-83-1	C4H10O	dry/wet	-0.679	0.158	-0.858	-0.147	-0.902	0.756	0.523	0.552	0.358	0.676	0.21	0.44	0.31	0.34	0.73	0.19	0.37	0.27	0.33	0.7309	0.0194	1.9	0.0022	out of domain	2	0.8374	76.4	0.0078		0	0.6981	79.2	0.0972	high leverage	1	0.3233	12.3	0.0151	low similarity	1
136	89	1-PENTANOL	Hexane	000071-41-0	C5H12O	dry/wet	0.037	0.848	-0.473	0.627	-0.509	0.841	0.536	0.566	0.398	0.814	0.2	0.46	0.31	0.32	0.87	0.19	0.47	0.36	0.47	0.8718	0.0194	1.9	0.0022	out of domain	2	0.8971	89.3	0.0182		0	0.4208	54.5	0.0196		0	0.9246	94.4	0.0188		0
266	89	3-METHYL-1-BUTANOL<ISOPENTANOL>	Hexane	000123-51-3	C5H12O	dry/wet	-0.27	0.746	-0.687	0.479	-0.767	0.834	0.545	0.565	0.435	0.809	0.21	0.44	0.31	0.34	0.87	0.19	0.37	0.33	0.39	0.8718	0.0194	1.9	0.0022	out of domain	2	0.8374	76.4	0.0078		0	0.296	43.7	0.034		0	0.3558	14.6	0.0213	low similarity	1
296	89	1-HEXANOL	Hexane	000111-27-3	C6H14O	dry/wet	0.448	1.437	0.12	1.254	0.109	0.948	0.56	0.535	0.418	0.942	0.2	0.46	0.31	0.32	1.01	0.19	0.47	0.36	0.47	1.0127	0.0194	1.9	0.0022	out of domain	2	0.8971	89.3	0.0182		0	0.4208	54.5	0.0196		0	0.9246	94.4	0.0188		0
343	89	1-HEPTANOL	Hexane	000111-70-6	C7H16O	dry/wet	1.009	2.027	0.72	1.882	0.782	1.055	0.56	0.569	0.398	1.072	0.2	0.47	0.31	0.32	1.15	0.19	0.47	0.36	0.47	1.1536	0.0194	1.9	0.0022	out of domain	2	0.8971	89.3	0.0182		0	0.4208	54.5	0.0196		0	0.9246	94.4	0.0188		0
345	89	1-DECANOL	Hexane	000112-30-1	C10H22O	dry/wet	2.97	3.787	2.545	3.752	2.738	1.39	0.614	0.537	0.415	1.461	0.19	0.48	0.31	0.33	1.58	0.19	0.47	0.36	0.47	1.5763	0.0194	1.9	0.0022	out of domain	2	0.8971	89.3	0.0182		0	0.4208	54.5	0.0196		0	0.9246	94.4	0.0188		0
535	89	1-DODECANOL	Hexane	000112-53-8	C12H26O	dry/wet	4.35	4.966	3.702	5.006	3.991	1.627	0.646	0.542	0.419	1.717	0.19	0.49	0.31	0.34	1.86	0.19	0.47	0.36	0.47	1.8581	0.0194	1.9	0.0022	out of domain	2	0.8971	89.3	0.0182		0	0.4208	54.5	0.0196		0	0.9246	94.4	0.0188		0
30990	89	DIMETHYL-SULFIDE	Hexane	000075-18-3	C2H6S	dry/wet	1.035	1.667	1.299	1.49	1.362	0.86	0.558	0.042	0.16	0.533	0.35	0.33	0	0.16	0.55	0.34	0.26	0	0.1	0.5539	0.6708	56.5	0.0042		0	0.6877	52.1	0.0197		0	0	0	0	no fragment overlap	0	0.3104	11.4	0.0088	low similarity	1
31	89	BENZENE	Hexane	000071-43-2	C6H6	dry/wet	2.31	2.053	2.239	2.079	2.42	1.173	0.598	0.059	0.102	0.674	0.56	0.69	0	0.12	0.72	0.58	0.6	0	0.13	0.7164	0.3858	14.7	0.0092	low similarity	1	0.7874	70.4	0.0024		0	0	0	0	no fragment overlap	0	0.6062	49.6	0.0039		0
161	89	TOLUENE	Hexane	000108-88-3	C7H8	dry/wet	2.83	2.775	2.784	2.843	2.976	1.315	0.606	0.056	0.121	0.802	0.58	0.63	0	0.12	0.86	0.63	0.62	0	0.16	0.8573	0.5953	40.7	0.0035		0	0.8573	81	0.0021		0	0	0	0	no fragment overlap	0	0.7763	79.5	0.0029		0
25	89	ETHYLBENZENE	Hexane	000100-41-4	C8H10	dry/wet	3.342	3.364	3.338	3.468	3.558	1.428	0.614	0.054	0.132	0.928	0.58	0.64	0	0.12	1	0.63	0.48	0	0.17	0.9982	0.5953	40.7	0.0035		0	0.942	96.3	0.011		0	0	0	0	no fragment overlap	0	0.8392	87.5	0.0042		0
471	89	BIPHENYL	Hexane	000092-52-4	C12H10	dry/wet	4.3	3.902	3.59	4.193	3.994	2.339	1.096	0.088	0.267	1.232	1.39	1.16	0	0.21	1.32	1.32	1.07	0	0.27	1.3242	0.5679	35.5	0.0134		0	0.8607	81.2	0.006		0	0	0	0	no fragment overlap	0	0.6182	52.1	0.0119		0
123	89	NAPHTHALENE	Hexane	000091-20-3	C10H8	dry/wet	3.58	3.238	3.121	3.482	3.433	2.055	0.936	0.077	0.202	1.018	1.27	1.02	0	0.17	1.09	1.28	0.93	0	0.18	1.0854	0.4324	18.5	0.0099	low similarity	1	0.7946	71.1	0.0038		0	0	0	0	no fragment overlap	0	0.6351	55.2	0.007		0
1169	89	ACENAPHTHYLENE-1,2-DIHYDRO	Hexane	000083-32-9	C12H10	dry/wet	4.135	4.297	3.851	4.693	4.142	2.33	0.96	0.055	0.247	1.19	1.53	0.99	0	0.15	1.26	1.58	1.07	0	0.27	1.2586	0.6334	47.9	0.1371	high leverage	1	0.6768	50.5	0.0085		0	0	0	0	no fragment overlap	0	0.7471	75.1	0.0146		0
1183	89	FLUORANTHENE	Hexane	000206-44-0	C16H10	dry/wet	4.969	4.942	4.338	5.576	4.73	3.527	1.389	0.112	0.37	1.495	2.6	1.52	0	0.25	1.58	2.27	1.53	0	0.32	1.5846	0.1058	2.8	0.3054	out of domain structural outlier	2	0.5354	31.6	0.0121		0	0	0	0	no fragment overlap	0	0.4466	25.9	0.0269		0
927	89	PHENANTHRENE	Hexane	000085-01-8	C14H10	dry/wet	4.552	4.417	3.906	4.878	4.295	3.016	1.258	0.111	0.321	1.357	1.99	1.34	0	0.23	1.45	2.07	1.25	0	0.22	1.4544	0.6251	46.3	0.1686	high leverage	1	0.6533	47.1	0.007		0	0	0	0	no fragment overlap	0	0.6043	49.3	0.011		0
1181	89	9H-FLUORENE	Hexane	000086-73-7	C13H10	dry/wet	4.362	4.372	3.634	4.777	4.004	2.587	1.163	0.082	0.311	1.279	1.65	1.13	0	0.19	1.36	1.69	1.16	0	0.37	1.3565	0.3057	9.5	0.5967	structural outlier	2	0.6605	48.1	0.0851	high leverage	1	0	0	0	no fragment overlap	0	0.4173	22	0.0204	low similarity	1
28	89	P-DICHLOROBENZENE	Hexane	000106-46-7	C6H4Cl2	dry/wet	3.7	3.038	3.126	3.255	3.514	1.543	0.757	0.123	0.092	0.934	0.86	0.88	0	0.1	0.96	0.86	0.53	0	0.05	0.9612	0.7582	73.3	0.0054		0	0.6394	45.4	0.0822		0	0	0	0	no fragment overlap	0	0.779	79.7	0.0026		0
961	89	1,2,3-TRICHLOROBENZENE	Hexane	000087-61-6	C6H3Cl3	dry/wet	4.16	3.858	3.791	4.246	4.144	1.689	0.717	0.101	0.108	1.051	0.95	0.92	0	0.04	1.08	1	0.84	0	0.05	1.0836	0.8256	85.5	0.0065		0	0.8469	78.4	0.0028		0	0	0	0	no fragment overlap	0	0.7654	78.4	0.0008		0
467	89	1,2,4-TRICHLOROBENZENE	Hexane	000120-82-1	C6H3Cl3	dry/wet	4.3	3.844	3.735	4.248	4.127	1.738	0.753	0.124	0.099	1.055	0.96	0.95	0	0.03	1.08	1	0.84	0	0.03	1.0836	0.881	94.7	0.0053		0	0.8469	78.4	0.0028		0	0	0	0	no fragment overlap	0	0.8852	91.9	0.0026		0
2374	89	1,3,5-TRICHLOROBENZENE	Hexane	000108-70-3	C6H3Cl3	dry/wet	4.53	3.949	3.901	4.364	4.312	1.75	0.731	0.133	0.074	1.063	0.97	0.91	0	0.02	1.08	1.01	0.84	0	0.01	1.0836	0.7927	80	0.0077		0	0.8469	78.4	0.0028		0	0	0	0	no fragment overlap	0	0.8486	88.3	0.0064		0
2821	89	PENTACHLOROBENZENE	Hexane	000608-93-5	C6HCl5	dry/wet	5.32	4.884	4.997	5.487	5.338	2.134	0.726	0.088	0.137	1.294	1.2	1.13	0	0	1.33	1.28	0.88	0.05	0	1.3284	0.365	13.1	0.0134	low similarity	1	0.6886	52.2	0.121	high leverage	1	0.7295	82.7	0.1255	structural outlier	2	0.9515	98.3	0.0007		0
2822	89	HEXACHLOROBENZENE	Hexane	000118-74-1	C6Cl6	dry/wet	5.979	5.311	5.599	5.994	5.888	2.337	0.714	0.053	0.171	1.409	1.33	1.23	0	0	1.45	1.42	1.08	0	0	1.4508	0.4172	17	0.0278	low similarity	1	0.4378	21.5	0.0112	low similarity	1	0	0	0	no fragment overlap	0	0	0	0	no fragment overlap	0
79	89	BENZALDEHYDE	Hexane	000100-52-7	C7H6O	dry/wet	1.103	0.662	0.687	0.35	0.779	1.34	0.998	0.06	0.444	0.829	0.81	1.18	0	0.4	0.87	0.86	0.99	0	0.37	0.873	0.6335	47.9	0.0237		0	0.7692	67.7	0.0275		0	0	0	0	no fragment overlap	0	0.5649	44.1	0.0031		0
372	89	ACETOPHENONE	Hexane	000098-86-2	C8H8O	dry/wet	1.074	1.26	0.913	0.949	0.998	1.421	1.037	0.062	0.504	0.953	0.79	1.13	0	0.42	1.01	0.75	1	0	0.5	1.0139	0.7123	64.1	0.0047		0	0.7686	67.6	0.0079		0	0	0	0	no fragment overlap	0	0.5913	47.4	0.0455		0
30	89	NITROBENZENE	Hexane	000098-95-3	C6H5NO2	dry/wet	1.444	1.525	1.091	1.556	1.348	1.278	1.009	0.088	0.354	0.859	0.83	1.26	0	0.21	0.89	0.87	1.08	0	0.23	0.8906	0.3069	9.6	0.0073	low similarity	1	0.8069	72.5	0.0048		0	0	0	0	no fragment overlap	0	0.8404	87.5	0.0061		0
387	89	1,2,4,5-TETRAMETHYLBENZENE	Hexane	000095-93-2	C10H14	dry/wet	4.783	4.942	4.375	5.136	4.606	1.757	0.638	0.05	0.173	1.174	0.65	0.46	0	0.12	1.28	0.72	0.65	0	0.35	1.28	0.7406	70.1	0.0066		0	0.6885	52.1	0.0171		0	0	0	0	no fragment overlap	0	0.4189	22.2	0.0813	low similarity	1
5441	89	MONURON	Hexane	000150-68-5	C9H11ClN2O	dry/wet	-0.44	-0.618	0.751	-1.177	1.064	2.143	1.361	0.419	0.63	1.382	1.16	1.59	0.37	0.84	1.48	1.29	1.5	0.38	0.84	1.4768	0.7036	62.8	0.0547		0	0.638	45.1	0.0507		0	0.0686	5.8	0.0165	low similarity	1	0.7017	67.8	0.0455		0
5972	89	DIPHENYL-SULFONE	Hexane	000127-63-9	C12H10O2S	dry/wet	1.24	1.086	1.48	0.61	1.725	2.327	1.549	0.124	0.769	1.508	1.26	2.01	0	0.74	1.61	1.49	2.02	0	0.77	1.6051	0.4724	23.2	0.0293	low similarity	1	0.4865	26.6	0.0247		0	0	0	0	no fragment overlap	0	0.6377	55.7	0.0197		0
49	89	3-METHYLPHENOL(M-CRESOL)	Hexane	000108-39-4	C7H8O	dry/wet	-0.32	-0.302	-0.704	-0.361	-0.173	1.339	0.971	0.789	0.225	0.862	0.81	0.84	0.5	0.39	0.92	0.77	1.02	0.68	0.32	0.916	0.8215	84.7	0.0094		0	0.7961	71.5	0.0492		0	0.2965	43.9	0.1134	structural outlier	2	0.7551	76.6	0.0034		0
132	89	4-METHYLPHENOL(P-CRESOL)	Hexane	000106-44-5	C7H8O	dry/wet	-0.34	-0.302	-0.648	-0.361	-0.122	1.333	0.96	0.783	0.222	0.863	0.81	0.84	0.5	0.39	0.92	0.82	0.97	0.53	0.32	0.916	0.7117	63.9	0.0265		0	0.8096	73.2	0.0263		0	0.1056	14.3	0.0437	low similarity	1	0.7551	76.6	0.0034		0
277	89	2,3-DIMETHYLPHENOL	Hexane	000526-75-0	C8H10O	dry/wet	0.38	0.425	0.624	0.41	0.99	1.458	0.958	0.47	0.314	0.98	0.83	0.79	0.5	0.39	1.06	0.83	0.83	0.41	0.38	1.0569	0.8556	91	0.0047		0	0.9174	92.6	0.0057		0	0	0	0.0044	out of domain	2	0.8127	84.8	0.0076		0
278	89	2,4-DIMETHYLPHENOL	Hexane	000105-67-9	C8H10O	dry/wet	0.362	0.425	0.764	0.41	1.161	1.471	0.961	0.468	0.293	0.987	0.83	0.79	0.5	0.39	1.06	0.83	0.83	0.41	0.36	1.0569	0.9135	96.9	0.0039		0	0.9174	92.6	0.0057		0	0	0	0.0044	out of domain	2	0.8084	84.6	0.0079		0
1206	89	2,5-DIMETHYLPHENOL	Hexane	000095-87-4	C8H10O	dry/wet	0.398	0.425	0.062	0.41	0.607	1.489	0.95	0.769	0.22	0.988	0.83	0.79	0.5	0.39	1.06	0.83	0.83	0.41	0.36	1.0569	0.9135	96.9	0.0039		0	0.9174	92.6	0.0057		0	0	0	0.0044	out of domain	2	0.8084	84.6	0.0079		0
1207	89	3,4-DIMETHYLPHENOL	Hexane	000095-65-8	C8H10O	dry/wet	0.279	0.425	-0.191	0.41	0.322	1.456	0.969	0.772	0.261	0.989	0.83	0.79	0.5	0.39	1.06	0.83	0.83	0.41	0.24	1.0569	0.9135	96.9	0.0039		0	0.9174	92.6	0.0057		0	0	0	0.0044	out of domain	2	0.509	35.2	0.2153	high leverage	1
280	89	3,5-DIMETHYLPHENOL	Hexane	000108-68-9	C8H10O	dry/wet	0.362	0.425	-0.104	0.41	0.43	1.478	0.965	0.782	0.242	0.992	0.83	0.79	0.5	0.39	1.06	0.83	0.83	0.57	0.34	1.0569	0.7846	78.5	0.0069		0	0.9174	92.6	0.0057		0	0	0	1	out of domain structural outlier	2	0.7723	78.8	0.0101		0
1564	89	2-ETHYLPHENOL	Hexane	000090-00-6	C8H10O	dry/wet	0.42	0.289	0.241	0.268	0.836	1.437	0.917	0.789	0.174	0.989	0.81	0.85	0.5	0.39	1.06	0.76	0.74	0.41	0.28	1.0569	0.6328	47.8	0.0089		0	0.6749	50.4	0.0024		0	0	0	0.0044	out of domain	2	0.6404	56.1	0.0413		0
1563	89	4-ETHYLPHENOL	Hexane	000123-07-9	C8H10O	dry/wet	0.29	0.289	-0.071	0.268	0.478	1.433	0.957	0.78	0.233	0.991	0.81	0.85	0.5	0.39	1.06	0.78	0.89	0.53	0.33	1.0569	0.9246	97.9	0.0332		0	0.9412	96.3	0.0253		0	0.1056	14.3	0.0437	low similarity	1	0.8409	87.7	0.0049		0
1170	89	P-TERT-BUTYLPHENOL	Hexane	000098-54-4	C10H14O	dry/wet	1.25	1.411	0.592	1.397	1.131	1.671	1.018	0.773	0.324	1.23	0.79	0.79	0.5	0.43	1.34	0.79	0.89	0.53	0.34	1.3387	0.7215	66	0.0347		0	0.9412	96.3	0.0253		0	0.1056	14.3	0.0437	low similarity	1	0.5541	42.3	0.0201		0
810	89	O-CHLOROPHENOL	Hexane	000095-57-8	C6H5ClO	dry/wet	0.851	0.703	1.245	0.722	1.659	1.361	0.828	0.402	0.16	0.859	0.84	0.84	0.33	0.3	0.9	0.87	0.89	0.41	0.27	0.8975	0.7172	65.2	0.0102		0	0.6552	47.3	0.0025		0	0	0	0.0044	out of domain	2	0.5931	47.9	0.0018		0
811	89	M-CHLOROPHENOL	Hexane	000108-43-0	C6H5ClO	dry/wet	-0.071	-0.936	-0.793	-0.767	-0.118	1.371	0.972	0.937	0.139	0.866	0.91	0.97	0.69	0.33	0.9	0.88	1.08	0.68	0.25	0.8975	0.7602	73.8	0.0104		0	0.8541	79.6	0.0485		0	0.2965	43.9	0.1134	structural outlier	2	0.71	68.9	0.0027		0
812	89	P-CHLOROPHENOL	Hexane	000106-48-9	C6H5ClO	dry/wet	-0.092	-1.146	-0.946	-1.056	-0.275	1.361	1.006	0.93	0.163	0.866	0.94	1.01	0.67	0.38	0.9	0.92	0.92	0.53	0.25	0.8975	0.7256	66.6	0.0271		0	0.7361	60.3	0.0452		0	0.1056	14.3	0.0437	low similarity	1	0.71	68.9	0.0027		0
608	89	3-NITROPHENOL	Hexane	000554-84-7	C6H5NO3	dry/wet	-1.347	-2.243	-2.517	-2.243	-1.849	1.309	1.252	1.042	0.362	0.92	1.05	1.47	0.69	0.49	0.95	1.01	1.48	0.68	0.39	0.9493	0.791	79.8	0.0125		0	0.5722	35.8	0.0515		0	0.2965	43.9	0.1134	structural outlier	2	0.6693	61.1	0.0063		0
619	89	4-NITROPHENOL	Hexane	000100-02-7	C6H5NO3	dry/wet	-2	-2.171	-2.986	-2.181	-2.333	1.371	1.323	1.081	0.413	0.92	1.05	1.47	0.67	0.49	0.95	1.06	1.57	0.53	0.39	0.9493	0.6963	61.7	0.0299		0	0.5353	31.6	0.095	high leverage	1	0.1056	14.3	0.0437	low similarity	1	0.6693	61.1	0.0063		0
50026	89	1-Naphthol	Hexane	000090-15-3	C10H8O1	dry/wet	0.517	0.161	0.041	0.279	0.649	2.066	1.131	0.863	0.243	1.081	1.5	1.23	0.5	0.45	1.14	1.46	1.31	0.41	0.35	1.1441	0.7822	78.1	0.0086		0	0.5044	28.4	0.1128	high leverage	1	0	0	0.0044	out of domain	2	0.5005	33.9	0.0048		0
857	89	2-NITROANILINE	Hexane	000088-74-4	C6H6N2O2	dry/wet	0.093	-0.088	-1.005	-0.301	-0.794	1.601	1.082	0.602	0.485	0.932	1.16	1.44	0.18	0.48	0.99	1.17	1.49	0.13	0.47	0.9904	0.8543	91	0.0157		0	0.5068	28.8	0.0097		0	0	0	0.1135	out of domain structural outlier	2	0.6193	52.5	0.0109		0
817	89	1,3-BENZENEDIOL	Hexane	000108-46-3	C6H6O2	dry/wet	-4.111	-3.821	-5.015	-3.959	-4.129	1.205	1.259	1.684	0.275	0.798	0.99	1.1	1	0.61	0.83	0.92	1.41	1.36	0.45	0.8338	0.7173	65.2	0.0177		0	0.5819	36.9	0.1928	structural outlier	2	0	0	0.4535	out of domain structural outlier	2	0.6223	53.1	0.0054		0
17	89	ANILINE	Hexane	000062-53-3	C6H7N	dry/wet	-0.1	-0.325	-0.365	-0.583	-0.035	1.357	0.985	0.475	0.297	0.762	0.86	1.08	0.23	0.43	0.82	0.94	1.01	0.27	0.35	0.8162	0.6208	45.7	0.011		0	0.6716	49.8	0.0071		0	0	0	0.012	out of domain	2	0.7438	73.9	0.007		0
766	89	1,2-BENZENEDIOL	Hexane	000120-80-9	C6H6O2	dry/wet	-2.89	-2.657	-2.857	-2.795	-2.095	1.206	1.08	1.274	0.192	0.793	0.93	1.08	0.77	0.53	0.83	0.91	1.01	0.82	0.47	0.8338	0.6291	47.1	0.018		0	0.6211	42.2	0.0074		0	0	0	0.0175	out of domain	2	0.6866	64.6	0.005		0
1642	89	P-HYDROQUINONE	Hexane	000123-31-9	C6H6O2	dry/wet	-4.287	-4.097	-4.889	-4.302	-4.187	1.183	1.211	1.553	0.365	0.801	1.02	1.14	1	0.65	0.83	0.98	1.32	1.06	0.45	0.8338	0.5593	34	0.1052		0	0.5116	29.1	0.1012	high leverage	1	0	0	0.1747	out of domain structural outlier	2	0.6223	53.1	0.0054		0
609	89	ETHOXYBENZENE	Hexane	000103-73-1	C8H10O	dry/wet	2.78	2.368	2.597	2.153	2.86	1.476	0.853	0.057	0.264	0.993	0.62	0.79	0	0.33	1.06	0.66	0.53	0	0.35	1.0569	0.7578	73.2	0.0062		0	0.8226	74.5	0.0015		0	0	0	0	no fragment overlap	0	0.5934	47.9	0.0116		0
2046	89	CYCLOHEXANONEOXIME	Hexane	000100-64-1	C6H11NO	dry/wet	-0.599	0.887	-0.659	0.559	-0.562	1.097	0.777	0.591	0.446	0.906	0.58	0.42	0.31	0.45	0.96	0.68	0.42	0.31	0.4	0.9609	0.5585	33.7	0.0207		0	0.278	8.8	0.0416	low similarity	1	0	0	0.0086	out of domain	2	0.3357	13	0.0025	low similarity	1
2939	89	P-METHOXYPHENOL	Hexane	000150-76-5	C7H8O2	dry/wet	-0.91	-1.303	-1.598	-1.66	-1.073	1.333	1.185	0.799	0.389	0.93	0.85	1.03	0.5	0.59	0.97	0.9	1.24	0.53	0.47	0.9747	0.728	67.5	0.0714		0	0.7221	57.7	0.0505		0	0.1056	14.3	0.0437	low similarity	1	0.7344	72.3	0.0056		0
630	89	O-METHYLANILINE	Hexane	000095-53-4	C7H9N	dry/wet	0.43	0.395	0.389	0.178	0.707	1.49	0.989	0.403	0.32	0.885	0.88	1.02	0.23	0.43	0.96	0.93	1.03	0.13	0.4	0.9571	0.8483	89.8	0.0124		0	0.6939	53	0.0074		0	0	0	0.1135	out of domain structural outlier	2	0.7469	75	0.0077		0
1168	89	P-METHYLANILINE	Hexane	000106-49-0	C7H9N	dry/wet	0.35	0.395	0.295	0.178	0.609	1.5	0.979	0.44	0.323	0.892	0.88	1.02	0.23	0.43	0.96	0.96	1.03	0.27	0.38	0.9571	0.6645	54.2	0.0091		0	0.6939	53	0.0074		0	0	0	0.012	out of domain	2	0.6953	66.5	0.0078		0
1051	91	METHANE	Heptane	000074-82-8	CH4	dry/wet	1.385	1.027	1.48	0.932	1.397	0.516	0.15	0.035	-0.042	0.228	0.11	0.21	0	0.01	0.25	0	0	0	0	0.2495	0	0	0	no fragment overlap	0	0	0	0	no fragment overlap	0	0	0	0	no fragment overlap	0	0	0	0	no fragment overlap	0
316	91	2-METHYLPROPANE	Heptane	000075-28-5	C4H10	dry/wet	3.394	2.74	3.446	2.73	3.313	0.773	0.127	0.044	-0.043	0.618	0.01	0.17	0	0.06	0.67	0	0	0	0	0.6722	0	0	0	no fragment overlap	0	0	0	0	no fragment overlap	0	0	0	0	no fragment overlap	0	0	0	0	no fragment overlap	0
134	91	PENTANE	Heptane	000109-66-0	C5H12	dry/wet	4.1	3.449	4.209	3.516	4.061	0.876	0.106	0.049	-0.06	0.747	0	0.19	0	0.04	0.81	0	0	0	0	0.8131	0	0	0	no fragment overlap	0	0	0	0	no fragment overlap	0	0	0	0	no fragment overlap	0	0	0	0	no fragment overlap	0
89	91	HEXANE	Heptane	000110-54-3	C6H14	dry/wet	4.72	4.066	4.835	4.182	4.66	0.98	0.097	0.055	-0.055	0.875	0	0.19	0	0.04	0.95	0	0	0	0	0.954	0	0	0	no fragment overlap	0	0	0	0	no fragment overlap	0	0	0	0	no fragment overlap	0	0	0	0	no fragment overlap	0
91	91	HEPTANE	Heptane	000142-82-5	C7H16	dry/wet	5.4	4.681	5.406	4.845	5.236	1.105	0.122	0.055	-0.049	1	0	0.2	0	0.05	1.09	0	0	0	0	1.0949	0	0	0	no fragment overlap	0	0	0	0	no fragment overlap	0	0	0	0	no fragment overlap	0	0	0	0	no fragment overlap	0
74	91	2,4-DIMETHYLPENTANE	Heptane	000108-08-7	C7H16	dry/wet	5.166	4.495	5.04	4.606	4.797	1.061	0.115	0.06	0.017	0.995	0.02	0.16	0	0.1	1.09	0	0	0	0	1.0949	0	0	0	no fragment overlap	0	0	0	0	no fragment overlap	0	0	0	0	no fragment overlap	0	0	0	0	no fragment overlap	0
128	91	OCTANE	Heptane	000111-65-9	C8H18	dry/wet	6.03	5.298	6.097	5.512	5.929	1.191	0.126	0.058	-0.057	1.135	0	0.2	0	0.05	1.24	0	0	0	0	1.2358	0	0	0	no fragment overlap	0	0	0	0	no fragment overlap	0	0	0	0	no fragment overlap	0	0	0	0	no fragment overlap	0
1283	91	2,5-DIMETHYLHEXANE	Heptane	000592-13-2	C8H18	dry/wet	5.59	5.112	5.696	5.272	5.469	1.155	0.133	0.062	0.01	1.128	0.02	0.17	0	0.1	1.24	0	0	0	0	1.2358	0	0	0	no fragment overlap	0	0	0	0	no fragment overlap	0	0	0	0	no fragment overlap	0	0	0	0	no fragment overlap	0
398	91	NONANE	Heptane	000111-84-2	C9H20	dry/wet	6.6	5.91	6.659	6.172	6.494	1.328	0.153	0.058	-0.05	1.258	-0.01	0.2	0	0.05	1.38	0	0	0	0	1.3767	0	0	0	no fragment overlap	0	0	0	0	no fragment overlap	0	0	0	0	no fragment overlap	0	0	0	0	no fragment overlap	0
53	91	METHYLCYCLOHEXANE	Heptane	000108-87-2	C7H14	dry/wet	4.72	4.168	4.744	4.334	4.57	1.109	0.163	0.043	-0.01	0.904	0.22	0.27	0	0.05	0.99	0.26	0.18	0	0	0.9863	0.6786	58.3	0.003		0	0.5193	29.6	0.0021		0	0	0	0	no fragment overlap	0	0	0	0	no fragment overlap	0
401	91	ETHYLCYCLOHEXANE	Heptane	001678-91-7	C8H16	dry/wet	5.52	4.786	5.321	5	5.148	1.189	0.18	0.044	-0.003	1.035	0.22	0.27	0	0.05	1.13	0.26	0.18	0	0	1.1272	0.6786	58.3	0.003		0	0.5193	29.6	0.0021		0	0	0	0	no fragment overlap	0	0	0	0	no fragment overlap	0
1053	91	ETHYLENE	Heptane	000074-85-1	C2H4	dry/wet	1.397	1.254	1.316	1.136	1.328	0.621	0.325	0.044	0.022	0.329	0.1	0.19	0	0.07	0.35	0.12	0.11	0	0.07	0.3474	0.5931	40.1	0.0018		0	0.3517	14.4	0.0009	low similarity	1	0	0	0	no fragment overlap	0	0.6727	62.8	0.002		0
1055	91	PROPYLENE	Heptane	000115-07-1	C3H6	dry/wet	1.746	1.747	1.946	1.668	1.941	0.74	0.33	0.039	0.029	0.456	0.13	0.24	0	0.08	0.49	0.12	0.11	0	0.07	0.4883	0.5931	40.1	0.0018		0	0.3517	14.4	0.0009	low similarity	1	0	0	0	no fragment overlap	0	0.6727	62.8	0.002		0
368	91	1-BUTENE	Heptane	000106-98-9	C4H8	dry/wet	2.827	2.361	2.613	2.332	2.582	0.849	0.318	0.041	0.031	0.585	0.13	0.24	0	0.09	0.63	0.12	0.11	0	0.07	0.6292	0.5931	40.1	0.0018		0	0.3517	14.4	0.0009	low similarity	1	0	0	0	no fragment overlap	0	0.6727	62.8	0.002		0
457	91	ISOBUTYLENE	Heptane	000115-11-7	C4H8	dry/wet	2.629	2.389	2.432	2.342	2.395	0.859	0.34	0.043	0.055	0.58	0.11	0.18	0	0.1	0.63	0.18	0.11	0	0.07	0.6292	0.4198	17.1	0.0718	low similarity	1	0.3517	14.4	0.0009	low similarity	1	0	0	0	no fragment overlap	0	0.6727	62.8	0.002		0
257	91	1-PENTENE	Heptane	000109-67-1	C5H10	dry/wet	3.54	2.978	3.259	2.997	3.199	0.95	0.307	0.046	0.036	0.716	0.13	0.24	0	0.09	0.77	0.12	0.11	0	0.07	0.7701	0.5931	40.1	0.0018		0	0.3517	14.4	0.0009	low similarity	1	0	0	0	no fragment overlap	0	0.6727	62.8	0.002		0
356	91	3-METHYL-1-BUTENE	Heptane	000563-45-1	C5H10	dry/wet	3.51	2.885	3.094	2.878	3.015	0.928	0.311	0.045	0.06	0.709	0.13	0.23	0	0.12	0.77	0.12	0.11	0	0.07	0.7701	0.5931	40.1	0.0018		0	0.3517	14.4	0.0009	low similarity	1	0	0	0	no fragment overlap	0	0.6727	62.8	0.002		0
100	91	1-HEXENE	Heptane	000592-41-6	C6H12	dry/wet	3.97	3.593	3.836	3.661	3.756	1.074	0.311	0.05	0.045	0.839	0.12	0.25	0	0.09	0.91	0.12	0.11	0	0.07	0.911	0.5931	40.1	0.0018		0	0.3517	14.4	0.0009	low similarity	1	0	0	0	no fragment overlap	0	0.6727	62.8	0.002		0
600	91	1-HEPTENE	Heptane	000592-76-7	C7H14	dry/wet	4.52	4.21	4.485	4.327	4.404	1.181	0.321	0.052	0.044	0.971	0.12	0.25	0	0.1	1.05	0.12	0.11	0	0.07	1.0519	0.5931	40.1	0.0018		0	0.3517	14.4	0.0009	low similarity	1	0	0	0	no fragment overlap	0	0.6727	62.8	0.002		0
129	91	1-OCTENE	Heptane	000111-66-0	C8H16	dry/wet	5.2	4.827	5.116	4.994	5.036	1.291	0.334	0.054	0.043	1.1	0.12	0.26	0	0.1	1.19	0.12	0.11	0	0.07	1.1928	0.5931	40.1	0.0018		0	0.3517	14.4	0.0009	low similarity	1	0	0	0	no fragment overlap	0	0.6727	62.8	0.002		0
364	91	1,3-BUTADIENE	Heptane	000106-99-0	C4H6	dry/wet	2.41	1.89	1.933	1.813	2.002	1.041	0.495	0.064	0.079	0.554	0.25	0.3	0	0.14	0.59	0.23	0.23	0	0.14	0.5862	0.4203	17.4	0.0071	low similarity	1	0.746	61.9	0.0037		0	0	0	0	no fragment overlap	0	0.7461	74.9	0.0081		0
98	91	2-METHYL-1,3-BUTADIENE	Heptane	000078-79-5	C5H8	dry/wet	2.86	2.532	2.474	2.487	2.485	1.114	0.473	0.062	0.105	0.678	0.23	0.24	0	0.16	0.73	0.36	0.23	0	0.14	0.7271	0.4882	24.5	0.3453	structural outlier	2	0.746	61.9	0.0037		0	0	0	0	no fragment overlap	0	0.7461	74.9	0.0081		0
1014	91	TETRAFLUOROMETHANE[R14]	Heptane	000075-73-0	CF4	dry/wet	1.834	1.524	2.859	1.355	2.737	-0.006	-0.061	0.046	-0.133	0.426	-0.47	-0.03	0	0	0.32	-0.49	-0.42	0	0	0.3203	0.6313	47.7	0.2027	high leverage	1	0.0106	0.1	0.2389	out of domain structural outlier	2	0	0	0	no fragment overlap	0	0	0	0	no fragment overlap	0
47	91	CHLOROFORM	Heptane	000067-66-3	CHCl3	dry/wet	1.86	1.943	2.057	2.021	2.269	0.81	0.521	0.172	0.005	0.629	0.34	0.48	0.12	0	0.62	0.39	0.45	0	0	0.6167	0.6073	43.5	0.0197		0	0.578	36.6	0.0035		0	0	0	0	no fragment overlap	0	0	0	0	no fragment overlap	0
157	91	TETRACHLOROMETHANE	Heptane	000056-23-5	CCl4	dry/wet	3.19	2.828	3.633	2.977	3.625	0.926	0.298	0.067	-0.016	0.759	0.42	0.55	0	0	0.74	0.52	0.6	0	0	0.7391	0.4857	24.2	0.0349	low similarity	1	0.6167	41.8	0.0062		0	0	0	0	no fragment overlap	0	0	0	0	no fragment overlap	0
332	91	1-CHLOROPROPANE	Heptane	000540-54-5	C3H7Cl	dry/wet	2.17	2.566	2.13	2.599	2.172	0.8	0.451	0.051	0.094	0.619	0.13	0.32	0	0.03	0.65	0.2	0.32	0	0	0.6537	0.7377	69.2	0.0066		0	0.7947	71.2	0.0103		0	0	0	0	no fragment overlap	0	0	0	0	no fragment overlap	0
219	91	TERT-BUTYLCHLORIDE	Heptane	000507-20-0	C4H9Cl	dry/wet	3.28	3.147	2.388	3.192	2.337	0.89	0.45	0.056	0.17	0.745	0.11	0.26	0	0.07	0.79	0.13	0.15	0	0	0.7946	0.5558	33.3	0.0022		0	0.4394	21.7	0.0004	low similarity	1	0	0	0	no fragment overlap	0	0	0	0	no fragment overlap	0
30856	91	ETHYLBROMIDE	Heptane	000074-96-4	C2H5Br	dry/wet	1.69	2.135	1.606	2.173	1.678	0.817	0.494	0.055	0.103	0.533	0.31	0.4	0	0.03	0.57	0.34	0.39	0	0.09	0.5654	0.8018	81.2	0.019		0	0.9742	99	0.0263		0	0	0	0	no fragment overlap	0	0.8791	91	0.0371		0
245	91	DICHLORODIFLUOROMETHANE[R12]	Heptane	000075-71-8	CCl2F2	dry/wet	2.46	2.177	3.269	2.168	3.139	0.456	0.06	0.071	-0.068	0.589	-0.02	0.26	0	0	0.53	0	0.3	0	0	0.5297	0.6278	46.9	0.1036		0	0.5926	38.2	0.0015		0	0	0	0	no fragment overlap	0	0	0	0	no fragment overlap	0
446	91	CHLOROTRIFLUOROMETHANE	Heptane	000075-72-9	CClF3	dry/wet	2.09	1.85	3.049	1.761	2.893	0.221	-0.025	0.066	-0.094	0.506	-0.24	0.12	0	0	0.42	-0.24	0.05	0	0	0.425	0.5076	27.4	0.0703		0	0.5444	32.6	0.0153		0	0	0	0	no fragment overlap	0	0	0	0	no fragment overlap	0
1946	91	1,2-DIFLUORO-1,1,2,2-TETRACHLOROETHANE	Heptane	000076-12-0	C2Cl4F2	dry/wet	4.64	3.459	4.486	3.598	4.385	0.806	0.213	0.086	0.011	0.968	0.42	0.45	0	0.08	0.92	0.38	0.16	0	0	0.9154	0.7581	73.3	0.1883	high leverage	1	0.453	23.2	0.1116	high leverage low similarity	1	0	0	0	no fragment overlap	0	0	0	0	no fragment overlap	0
876	91	METHYLTERT-AMYLETHER	Heptane	000994-05-8	C6H14O	dry/wet	1.638	3	2.394	2.868	2.073	0.912	0.402	0.048	0.376	0.93	0.02	0.28	0	0.29	1.01	0	0.14	0	0.22	1.0127	0	0	0	no fragment overlap	0	0.6134	41.2	0.0031		0	0	0	0	no fragment overlap	0	0	0	0.0035	out of domain	2
4	91	ACETONE	Heptane	000067-64-1	C3H6O	dry/wet	-0.96	-0.02	-0.829	-0.368	-0.923	0.63	0.712	0.046	0.485	0.515	0.22	0.67	0	0.34	0.55	0.12	0.64	0	0.5	0.547	0.5931	40.1	0.0018		0	0.6565	47.5	0.0268		0	0	0	0	no fragment overlap	0	0.334	13	0.0452	low similarity	1
40	91	2-BUTANONE	Heptane	000078-93-3	C4H8O	dry/wet	-0.23	0.596	0.069	0.298	-0.05	0.692	0.668	0.033	0.461	0.649	0.21	0.67	0	0.34	0.69	0.12	0.63	0	0.48	0.6879	0.5931	40.1	0.0018		0	0.891	87.7	0.0084		0	0	0	0	no fragment overlap	0	0.4432	25.5	0.0579		0
137	91	2-PENTANONE	Heptane	000107-87-9	C5H10O	dry/wet	0.403	1.211	0.652	0.962	0.53	0.813	0.68	0.037	0.462	0.769	0.21	0.68	0	0.34	0.83	0.12	0.63	0	0.5	0.8288	0.5931	40.1	0.0018		0	0.891	87.7	0.0084		0	0	0	0	no fragment overlap	0	0.9604	99	0.0156		0
616	91	METHYLBUTYLKETONE	Heptane	000591-78-6	C6H12O	dry/wet	0.925	1.828	1.311	1.629	1.174	0.903	0.681	0.035	0.467	0.905	0.21	0.68	0	0.35	0.97	0.12	0.63	0	0.5	0.9697	0.5931	40.1	0.0018		0	0.891	87.7	0.0084		0	0	0	0	no fragment overlap	0	0.9604	99	0.0156		0
92	91	2-HEPTANONE	Heptane	000110-43-0	C7H14O	dry/wet	1.576	2.443	1.929	2.292	1.797	1.022	0.696	0.039	0.463	1.029	0.21	0.69	0	0.35	1.11	0.08	0.63	0	0.5	1.1106	0.3755	14	0.0344	low similarity	1	0.891	87.7	0.0084		0	0	0	0	no fragment overlap	0	0.9604	99	0.0156		0
976	91	2-OCTANONE	Heptane	000111-13-7	C8H16O	dry/wet	2.003	3.06	2.557	2.958	2.417	1.126	0.705	0.039	0.467	1.16	0.21	0.69	0	0.35	1.25	0.06	0.63	0	0.5	1.2515	0.4997	26.4	0.0795		0	0.891	87.7	0.0084		0	0	0	0	no fragment overlap	0	0.9604	99	0.0156		0
662	91	3,3-DIMETHYL-2-BUTANONE	Heptane	000075-97-8	C6H12O	dry/wet	0.835	1.793	1.079	1.558	0.852	0.88	0.639	0.039	0.514	0.89	0.2	0.62	0	0.38	0.97	0.12	0.47	0	0.39	0.9697	0.5931	40.1	0.0018		0	0.7539	63.8	0.0068		0	0	0	0	no fragment overlap	0	0.5731	45.1	0.0115		0
250	91	CYCLOHEXANONE	Heptane	000108-94-1	C6H10O	dry/wet	0.2	1.409	0.613	1.237	0.46	0.931	0.735	0.002	0.526	0.809	0.42	0.77	0	0.32	0.86	0.5	0.81	0	0.51	0.8611	0	0	0.0629	out of domain	2	0.6653	49.1	0.0098		0	0	0	0	no fragment overlap	0	0.7542	76.5	0.0303		0
82	91	METHYLACETATE	Heptane	000079-20-9	C3H6O2	dry/wet	-0.265	0.237	-0.452	-0.139	-0.45	0.57	0.757	0.044	0.446	0.585	0.07	0.57	0	0.36	0.61	0.11	0.61	0	0.4	0.6057	0.631	47.6	0.0298		0	0.6969	53.3	0.0096		0	0	0	0	no fragment overlap	0	0.5298	38.1	0.0225		0
21	91	ETHYLACETATE	Heptane	000141-78-6	C4H8O2	dry/wet	0.43	0.849	0.204	0.521	0.154	0.667	0.735	0.033	0.464	0.716	0.07	0.58	0	0.36	0.75	0.07	0.62	0	0.48	0.7466	0.8503	90.3	0.0205		0	0.7051	54.7	0.0219		0	0	0	0	no fragment overlap	0	0.7374	72.8	0.0319		0
80	91	BUTYLACETATE	Heptane	000123-86-4	C6H12O2	dry/wet	1.67	2.076	1.688	1.845	1.613	0.85	0.703	0.033	0.437	0.973	0.06	0.59	0	0.37	1.03	0.07	0.57	0	0.46	1.0284	0.8503	90.3	0.0205		0	0.9448	96.5	0.0095		0	0	0	0	no fragment overlap	0	0.8152	85.1	0.0324		0
400	91	METHYLPROPIONATE	Heptane	000554-12-1	C4H8O2	dry/wet	0.509	0.849	0.16	0.521	0.105	0.653	0.734	0.033	0.469	0.713	0.07	0.58	0	0.36	0.75	0.09	0.6	0	0.44	0.7466	0.4929	25.2	0.0079		0	0.9361	95.5	0.0047		0	0	0	0	no fragment overlap	0	0.4969	33.4	0.0519		0
400	91	METHYLPROPIONATE	Heptane	000554-12-1	C4H8O2	dry/wet	1.721	0.849	0.16	0.521	0.105	0.653	0.734	0.033	0.469	0.713	0.07	0.58	0	0.36	0.75	0.09	0.6	0	0.44	0.7466	0.4929	25.2	0.0079		0	0.9361	95.5	0.0047		0	0	0	0	no fragment overlap	0	0.4969	33.4	0.0519		0
686	91	METHYLCAPROATE	Heptane	000106-70-7	C7H14O2	dry/wet	2.297	2.694	2.209	2.512	2.176	0.997	0.764	0.032	0.438	1.094	0.06	0.59	0	0.37	1.17	0.05	0.6	0	0.46	1.1693	0.411	16.5	0.0404	low similarity	1	0.9361	95.5	0.0047		0	0	0	0	no fragment overlap	0	0.9413	96.8	0.0122		0
3	91	ACETONITRILE	Heptane	000075-05-8	C2H3N	dry/wet	-1.18	-0.16	-1.611	-0.426	-1.489	0.504	0.837	0.106	0.417	0.391	0.19	0.72	0	0.2	0.4	0.17	0.56	0.05	0.18	0.4042	0.8597	91.7	0.0113		0	0.2974	9.7	0.0109	low similarity	1	0.2134	32.2	0.011		0	0.4544	26.8	0.0194		0
326	91	PROPIONITRILE	Heptane	000107-12-0	C3H5N	dry/wet	-0.72	0.456	-0.694	0.24	-0.66	0.598	0.767	0.06	0.422	0.519	0.19	0.73	0	0.2	0.55	0.17	0.56	0.05	0.3	0.5451	0.8597	91.7	0.0113		0	0.2974	9.7	0.0109	low similarity	1	0.2134	32.2	0.011		0	0.7429	73.4	0.0382		0
956	91	BUTYRONITRILE	Heptane	000109-74-0	C4H7N	dry/wet	0.029	1.072	-0.019	0.904	-0.007	0.702	0.763	0.051	0.427	0.649	0.19	0.73	0	0.21	0.69	0.17	0.56	0	0.3	0.686	0.8597	91.7	0.0113		0	0.2974	9.7	0.0109	low similarity	1	1	95.7	0.0385		0	0.7429	73.4	0.0382		0
320	91	ETHYLAMINE	Heptane	000075-04-7	C2H7N	dry/wet	-1.77	-1.741	-1.022	-2.362	-1.433	0.674	0.366	0.276	0.46	0.451	0.21	0.49	0.21	0.57	0.49	0.26	0.32	0.17	0.56	0.4902	0.558	33.7	0.0112		0	0.6992	53.5	0.0019		0	0.8347	87.5	0.0271		0	0.7619	77.9	0.0238		0
377	91	PROPYLAMINE	Heptane	000107-10-8	C3H9N	dry/wet	-1	-1.124	-0.178	-1.696	-0.603	0.752	0.333	0.276	0.433	0.582	0.2	0.5	0.21	0.58	0.63	0.26	0.32	0.17	0.56	0.6311	0.558	33.7	0.0112		0	0.6992	53.5	0.0019		0	0.8347	87.5	0.0271		0	0.7619	77.9	0.0238		0
240	91	BUTYLAMINE	Heptane	000109-73-9	C4H11N	dry/wet	-0.13	-0.509	0.438	-1.033	0.003	0.85	0.338	0.278	0.437	0.711	0.2	0.5	0.21	0.58	0.77	0.2	0.32	0.17	0.56	0.772	0.7765	76.4	0.0252		0	0.6992	53.5	0.0019		0	0.8347	87.5	0.0271		0	0.7619	77.9	0.0238		0
1251	91	PENTYLAMINE	Heptane	000110-58-7	C5H13N	dry/wet	0.48	0.107	1.091	-0.367	0.655	0.948	0.346	0.278	0.435	0.842	0.2	0.51	0.21	0.58	0.91	0.2	0.32	0.17	0.56	0.9129	0.7765	76.4	0.0252		0	0.6992	53.5	0.0019		0	0.8347	87.5	0.0271		0	0.7619	77.9	0.0238		0
105	91	HEXYLAMINE	Heptane	000111-26-2	C6H15N	dry/wet	1.09	0.719	1.536	0.293	1.083	1.059	0.377	0.278	0.468	0.972	0.2	0.51	0.21	0.59	1.05	0.2	0.32	0.17	0.56	1.0538	0.7765	76.4	0.0252		0	0.6992	53.5	0.0019		0	0.8347	87.5	0.0271		0	0.7619	77.9	0.0238		0
2077	91	HEPTYLAMINE	Heptane	000111-68-2	C7H17N	dry/wet	1.74	1.335	2.342	0.958	1.917	1.171	0.382	0.277	0.434	1.099	0.2	0.52	0.21	0.59	1.19	0.2	0.32	0.17	0.56	1.1947	0.7765	76.4	0.0252		0	0.6992	53.5	0.0019		0	0.8347	87.5	0.0271		0	0.7619	77.9	0.0238		0
1147	91	1-OCTYLAMINE	Heptane	000111-86-4	C8H19N	dry/wet	2.36	1.952	2.822	1.624	2.372	1.271	0.4	0.282	0.464	1.233	0.19	0.52	0.21	0.59	1.34	0.2	0.32	0.17	0.56	1.3356	0.7765	76.4	0.0252		0	0.6992	53.5	0.0019		0	0.8347	87.5	0.0271		0	0.7619	77.9	0.0238		0
533	91	TRIMETHYLAMINE	Heptane	000075-50-3	C3H9N	dry/wet	-0.56	0.089	1.447	-0.414	1.139	0.798	0.283	0.066	0.264	0.581	0.17	0.36	0	0.53	0.63	0.17	0.32	0	0.62	0.6311	0.2386	5.8	0.0025	low similarity	1	0.6992	53.5	0.0019		0	0	0	0	no fragment overlap	0	0.3054	11	0.2454	high leverage low similarity	1
126	91	1-NITROPROPANE	Heptane	000108-03-2	C3H7NO2	dry/wet	0.46	1.03	0.267	0.838	0.429	0.675	0.826	0.071	0.351	0.68	0.22	0.72	0	0.25	0.71	0.24	0.54	0	0.29	0.7055	0.7412	70.2	0.0041		0	0.1849	3.8	0.0036	out of domain	2	0	0	0	no fragment overlap	0	0.8163	85.2	0.0793		0
110	91	METHANOL	Heptane	000067-56-1	CH4O	dry/wet	-2.54	-1.518	-2.882	-1.914	-2.983	0.473	0.549	0.586	0.378	0.295	0.21	0.44	0.31	0.3	0.31	0.19	0.28	0.31	0.2	0.3082	0.0194	1.9	0.0022	out of domain	2	0.2446	7.5	0.0017	low similarity	1	0	0	0.0086	out of domain	2	0	0	0.0014	out of domain	2
11	91	ETHANOL	Heptane	000064-17-5	C2H6O	dry/wet	-2.03	-0.902	-2.161	-1.248	-2.315	0.564	0.522	0.562	0.391	0.424	0.21	0.45	0.31	0.31	0.45	0.19	0.37	0.33	0.33	0.4491	0.0194	1.9	0.0022	out of domain	2	0.8374	76.4	0.0078		0	0.296	43.7	0.034		0	0.3233	12.3	0.0151	low similarity	1
95	91	2-PROPANOL	Heptane	000067-63-0	C3H8O	dry/wet	-1.57	-0.38	-1.499	-0.704	-1.696	0.654	0.524	0.513	0.422	0.554	0.22	0.43	0.31	0.34	0.59	0.19	0.28	0.31	0.42	0.59	0.0194	1.9	0.0022	out of domain	2	0.2446	7.5	0.0017	low similarity	1	0	0	0.0086	out of domain	2	0	0	0.1444	out of domain	2
39	91	1-BUTANOL	Heptane	000071-36-3	C4H10O	dry/wet	-0.71	0.33	-0.971	0.081	-1.162	0.75	0.524	0.567	0.409	0.682	0.2	0.46	0.31	0.31	0.73	0.19	0.37	0.36	0.47	0.7309	0.0194	1.9	0.0022	out of domain	2	0.8374	76.4	0.0078		0	0.4208	54.5	0.0196		0	0.9246	94.4	0.0188		0
120	91	2-METHYL-1-PROPANOL	Heptane	000078-83-1	C4H10O	dry/wet	-0.72	0.237	-0.701	-0.038	-0.84	0.756	0.523	0.552	0.358	0.676	0.21	0.44	0.31	0.34	0.73	0.19	0.37	0.27	0.33	0.7309	0.0194	1.9	0.0022	out of domain	2	0.8374	76.4	0.0078		0	0.6981	79.2	0.0972	high leverage	1	0.3233	12.3	0.0151	low similarity	1
22	91	2-BUTANOL	Heptane	000078-92-2	C4H10O	dry/wet	-1	0.237	-0.54	-0.038	-0.694	0.743	0.517	0.503	0.365	0.682	0.21	0.44	0.31	0.34	0.73	0.19	0.28	0.31	0.51	0.7309	0.0194	1.9	0.0022	out of domain	2	0.2446	7.5	0.0017	low similarity	1	0	0	0.0086	out of domain	2	0.7584	77.3	0.0354		0
153	91	TERT-BUTANOL	Heptane	000075-65-0	C4H10O	dry/wet	-1.07	0.292	-0.995	0.008	-1.263	0.744	0.515	0.489	0.469	0.679	0.19	0.39	0.31	0.35	0.73	0.19	0.28	0.31	0.86	0.7309	0.0194	1.9	0.0022	out of domain	2	0.2446	7.5	0.0017	low similarity	1	0	0	0.0086	out of domain	2	0	0	0.6767	out of domain structural outlier	2
136	91	1-PENTANOL	Heptane	000071-41-0	C5H12O	dry/wet	-0.05	0.947	-0.279	0.747	-0.457	0.841	0.536	0.566	0.398	0.814	0.2	0.46	0.31	0.32	0.87	0.19	0.47	0.36	0.47	0.8718	0.0194	1.9	0.0022	out of domain	2	0.8971	89.3	0.0182		0	0.4208	54.5	0.0196		0	0.9246	94.4	0.0188		0
266	91	3-METHYL-1-BUTANOL<ISOPENTANOL>	Heptane	000123-51-3	C5H12O	dry/wet	-0.337	0.852	-0.497	0.626	-0.705	0.834	0.545	0.565	0.435	0.809	0.21	0.44	0.31	0.34	0.87	0.19	0.37	0.33	0.39	0.8718	0.0194	1.9	0.0022	out of domain	2	0.8374	76.4	0.0078		0	0.296	43.7	0.034		0	0.3558	14.6	0.0213	low similarity	1
296	91	1-HEXANOL	Heptane	000111-27-3	C6H14O	dry/wet	0.64	1.562	0.333	1.412	0.143	0.948	0.56	0.535	0.418	0.942	0.2	0.46	0.31	0.32	1.01	0.19	0.47	0.36	0.47	1.0127	0.0194	1.9	0.0022	out of domain	2	0.8971	89.3	0.0182		0	0.4208	54.5	0.0196		0	0.9246	94.4	0.0188		0
343	91	1-HEPTANOL	Heptane	000111-70-6	C7H16O	dry/wet	1.009	2.179	0.977	2.078	0.798	1.055	0.56	0.569	0.398	1.072	0.2	0.47	0.31	0.32	1.15	0.19	0.47	0.36	0.47	1.1536	0.0194	1.9	0.0022	out of domain	2	0.8971	89.3	0.0182		0	0.4208	54.5	0.0196		0	0.9246	94.4	0.0188		0
344	91	1-OCTANOL	Heptane	000111-87-5	C8H18O	dry/wet	1.7	2.789	1.623	2.736	1.436	1.161	0.565	0.572	0.398	1.203	0.2	0.47	0.31	0.32	1.29	0.19	0.47	0.36	0.47	1.2945	0.0194	1.9	0.0022	out of domain	2	0.8971	89.3	0.0182		0	0.4208	54.5	0.0196		0	0.9246	94.4	0.0188		0
31	91	BENZENE	Heptane	000071-43-2	C6H6	dry/wet	2.28	1.98	2.262	2.015	2.393	1.173	0.598	0.059	0.102	0.674	0.56	0.69	0	0.12	0.72	0.58	0.6	0	0.13	0.7164	0.3858	14.7	0.0092	low similarity	1	0.7874	70.4	0.0024		0	0	0	0	no fragment overlap	0	0.6062	49.6	0.0039		0
161	91	TOLUENE	Heptane	000108-88-3	C7H8	dry/wet	2.82	2.752	2.842	2.85	2.944	1.315	0.606	0.056	0.121	0.802	0.58	0.63	0	0.12	0.86	0.63	0.62	0	0.16	0.8573	0.5953	40.7	0.0035		0	0.8573	81	0.0021		0	0	0	0	no fragment overlap	0	0.7763	79.5	0.0029		0
322	91	O-XYLENE	Heptane	000095-47-6	C8H10	dry/wet	3.3	3.521	3.289	3.682	3.375	1.444	0.638	0.053	0.151	0.925	0.61	0.58	0	0.12	1	0.62	0.63	0	0.2	0.9982	0.6549	52.8	0.0067		0	0.8244	74.7	0.0044		0	0	0	0	no fragment overlap	0	0.7527	76.2	0.0069		0
175	91	M-XYLENE	Heptane	000108-38-3	C8H10	dry/wet	3.34	3.521	3.49	3.682	3.565	1.456	0.605	0.055	0.129	0.931	0.61	0.58	0	0.12	1	0.63	0.63	0	0.18	0.9982	0.8576	91.3	0.0081		0	0.8244	74.7	0.0044		0	0	0	0	no fragment overlap	0	0.8579	88.9	0.0072		0
25	91	ETHYLBENZENE	Heptane	000100-41-4	C8H10	dry/wet	3.31	3.367	3.428	3.514	3.512	1.428	0.614	0.054	0.132	0.928	0.58	0.64	0	0.12	1	0.63	0.48	0	0.17	0.9982	0.5953	40.7	0.0035		0	0.942	96.3	0.011		0	0	0	0	no fragment overlap	0	0.8392	87.5	0.0042		0
471	91	BIPHENYL	Heptane	000092-52-4	C12H10	dry/wet	4.31	3.869	3.675	4.184	3.98	2.339	1.096	0.088	0.267	1.232	1.39	1.16	0	0.21	1.32	1.32	1.07	0	0.27	1.3242	0.5679	35.5	0.0134		0	0.8607	81.2	0.006		0	0	0	0	no fragment overlap	0	0.6182	52.1	0.0119		0
123	91	NAPHTHALENE	Heptane	000091-20-3	C10H8	dry/wet	3.56	3.196	3.186	3.45	3.435	2.055	0.936	0.077	0.202	1.018	1.27	1.02	0	0.17	1.09	1.28	0.93	0	0.18	1.0854	0.4324	18.5	0.0099	low similarity	1	0.7946	71.1	0.0038		0	0	0	0	no fragment overlap	0	0.6351	55.2	0.007		0
1169	91	ACENAPHTHYLENE-1,2-DIHYDRO	Heptane	000083-32-9	C12H10	dry/wet	4.16	4.322	3.962	4.729	4.151	2.33	0.96	0.055	0.247	1.19	1.53	0.99	0	0.15	1.26	1.58	1.07	0	0.27	1.2586	0.6334	47.9	0.1371	high leverage	1	0.6768	50.5	0.0085		0	0	0	0	no fragment overlap	0	0.7471	75.1	0.0146		0
1183	91	FLUORANTHENE	Heptane	000206-44-0	C16H10	dry/wet	5.022	4.953	4.494	5.581	4.826	3.527	1.389	0.112	0.37	1.495	2.6	1.52	0	0.25	1.58	2.27	1.53	0	0.32	1.5846	0.1058	2.8	0.3054	out of domain structural outlier	2	0.5354	31.6	0.0121		0	0	0	0	no fragment overlap	0	0.4466	25.9	0.0269		0
927	91	PHENANTHRENE	Heptane	000085-01-8	C14H10	dry/wet	4.59	4.406	4.03	4.877	4.351	3.016	1.258	0.111	0.321	1.357	1.99	1.34	0	0.23	1.45	2.07	1.25	0	0.22	1.4544	0.6251	46.3	0.1686	high leverage	1	0.6533	47.1	0.007		0	0	0	0	no fragment overlap	0	0.6043	49.3	0.011		0
1181	91	9H-FLUORENE	Heptane	000086-73-7	C13H10	dry/wet	4.364	4.38	3.728	4.8	4.02	2.587	1.163	0.082	0.311	1.279	1.65	1.13	0	0.19	1.36	1.69	1.16	0	0.37	1.3565	0.3057	9.5	0.5967	structural outlier	2	0.6605	48.1	0.0851	high leverage	1	0	0	0	no fragment overlap	0	0.4173	22	0.0204	low similarity	1
28	91	P-DICHLOROBENZENE	Heptane	000106-46-7	C6H4Cl2	dry/wet	3.518	2.975	3.198	3.175	3.457	1.543	0.757	0.123	0.092	0.934	0.86	0.88	0	0.1	0.96	0.86	0.53	0	0.05	0.9612	0.7582	73.3	0.0054		0	0.6394	45.4	0.0822		0	0	0	0	no fragment overlap	0	0.779	79.7	0.0026		0
2822	91	HEXACHLOROBENZENE	Heptane	000118-74-1	C6Cl6	dry/wet	6.008	5.269	5.835	5.843	5.861	2.337	0.714	0.053	0.171	1.409	1.33	1.23	0	0	1.45	1.42	1.08	0	0	1.4508	0.4172	17	0.0278	low similarity	1	0.4378	21.5	0.0112	low similarity	1	0	0	0	no fragment overlap	0	0	0	0	no fragment overlap	0
18	91	ANISOLE	Heptane	000100-66-3	C7H8O	dry/wet	2.121	1.723	1.928	1.61	2.13	1.338	0.857	0.064	0.261	0.863	0.62	0.79	0	0.33	0.92	0.66	0.67	0	0.31	0.916	0.7578	73.2	0.0062		0	0.5734	36	0.0046		0	0	0	0	no fragment overlap	0	0.8708	90.4	0.0048		0
79	91	BENZALDEHYDE	Heptane	000100-52-7	C7H6O	dry/wet	1.081	0.486	0.632	0.286	0.778	1.34	0.998	0.06	0.444	0.829	0.81	1.18	0	0.4	0.87	0.86	0.99	0	0.37	0.873	0.6335	47.9	0.0237		0	0.7692	67.7	0.0275		0	0	0	0	no fragment overlap	0	0.5649	44.1	0.0031		0
29	91	BENZONITRILE	Heptane	000100-47-0	C7H5N	dry/wet	0.817	1.12	0.684	1.057	0.871	1.345	1.004	0.09	0.412	0.831	0.73	1.17	0	0.26	0.87	0.8	1.09	0.02	0.27	0.8711	0.5502	32.3	0.0148		0	0.6263	43.2	0.0117		0	0.9039	93.9	0.0182		0	0.5484	41.5	0.0197		0
30	91	NITROBENZENE	Heptane	000098-95-3	C6H5NO2	dry/wet	1.48	1.322	1.037	1.333	1.301	1.278	1.009	0.088	0.354	0.859	0.83	1.26	0	0.21	0.89	0.87	1.08	0	0.23	0.8906	0.3069	9.6	0.0073	low similarity	1	0.8069	72.5	0.0048		0	0	0	0	no fragment overlap	0	0.8404	87.5	0.0061		0
30991	91	THIOPHENE	Heptane	000110-02-1	C4H4S	dry/wet	1.968	2.038	1.663	2.103	1.88	1.111	0.685	0.093	0.112	0.626	0.5	0.62	0	0.06	0.64	0.63	0.83	0	0.19	0.6411	0.5783	37	0.0141		0	0.6595	47.9	0.0228		0	0	0	0	no fragment overlap	0	0.6304	54.2	0.0101		0
387	91	1,2,4,5-TETRAMETHYLBENZENE	Heptane	000095-93-2	C10H14	dry/wet	4.741	5.068	4.536	5.355	4.559	1.757	0.638	0.05	0.173	1.174	0.65	0.46	0	0.12	1.28	0.72	0.65	0	0.35	1.28	0.7406	70.1	0.0066		0	0.6885	52.1	0.0171		0	0	0	0	no fragment overlap	0	0.4189	22.2	0.0813	low similarity	1
5441	91	MONURON	Heptane	000150-68-5	C9H11ClN2O	dry/wet	-0.48	-0.662	0.863	-1.072	1.089	2.143	1.361	0.419	0.63	1.382	1.16	1.59	0.37	0.84	1.48	1.29	1.5	0.38	0.84	1.4768	0.7036	62.8	0.0547		0	0.638	45.1	0.0507		0	0.0686	5.8	0.0165	low similarity	1	0.7017	67.8	0.0455		0
5972	91	DIPHENYL-SULFONE	Heptane	000127-63-9	C12H10O2S	dry/wet	1.244	0.828	1.491	0.576	1.721	2.327	1.549	0.124	0.769	1.508	1.26	2.01	0	0.74	1.61	1.49	2.02	0	0.77	1.6051	0.4724	23.2	0.0293	low similarity	1	0.4865	26.6	0.0247		0	0	0	0	no fragment overlap	0	0.6377	55.7	0.0197		0
49	91	3-METHYLPHENOL(M-CRESOL)	Heptane	000108-39-4	C7H8O	dry/wet	-0.367	-0.215	-0.545	-0.377	-0.158	1.339	0.971	0.789	0.225	0.862	0.81	0.84	0.5	0.39	0.92	0.77	1.02	0.68	0.32	0.916	0.8215	84.7	0.0094		0	0.7961	71.5	0.0492		0	0.2965	43.9	0.1134	structural outlier	2	0.7551	76.6	0.0034		0
132	91	4-METHYLPHENOL(P-CRESOL)	Heptane	000106-44-5	C7H8O	dry/wet	-0.358	-0.215	-0.488	-0.377	-0.108	1.333	0.96	0.783	0.222	0.863	0.81	0.84	0.5	0.39	0.92	0.82	0.97	0.53	0.32	0.916	0.7117	63.9	0.0265		0	0.8096	73.2	0.0263		0	0.1056	14.3	0.0437	low similarity	1	0.7551	76.6	0.0034		0
278	91	2,4-DIMETHYLPHENOL	Heptane	000105-67-9	C8H10O	dry/wet	0.342	0.562	0.875	0.464	1.149	1.471	0.961	0.468	0.293	0.987	0.83	0.79	0.5	0.39	1.06	0.83	0.83	0.41	0.36	1.0569	0.9135	96.9	0.0039		0	0.9174	92.6	0.0057		0	0	0	0.0044	out of domain	2	0.8084	84.6	0.0079		0
1206	91	2,5-DIMETHYLPHENOL	Heptane	000095-87-4	C8H10O	dry/wet	0.38	0.562	0.261	0.464	0.613	1.489	0.95	0.769	0.22	0.988	0.83	0.79	0.5	0.39	1.06	0.83	0.83	0.41	0.36	1.0569	0.9135	96.9	0.0039		0	0.9174	92.6	0.0057		0	0	0	0.0044	out of domain	2	0.8084	84.6	0.0079		0
1207	91	3,4-DIMETHYLPHENOL	Heptane	000095-65-8	C8H10O	dry/wet	0.279	0.562	0	0.464	0.332	1.456	0.969	0.772	0.261	0.989	0.83	0.79	0.5	0.39	1.06	0.83	0.83	0.41	0.24	1.0569	0.9135	96.9	0.0039		0	0.9174	92.6	0.0057		0	0	0	0.0044	out of domain	2	0.509	35.2	0.2153	high leverage	1
280	91	3,5-DIMETHYLPHENOL	Heptane	000108-68-9	C8H10O	dry/wet	0.322	0.562	0.094	0.464	0.44	1.478	0.965	0.782	0.242	0.992	0.83	0.79	0.5	0.39	1.06	0.83	0.83	0.57	0.34	1.0569	0.7846	78.5	0.0069		0	0.9174	92.6	0.0057		0	0	0	1	out of domain structural outlier	2	0.7723	78.8	0.0101		0
1563	91	4-ETHYLPHENOL	Heptane	000123-07-9	C8H10O	dry/wet	0.24	0.403	0.125	0.29	0.478	1.433	0.957	0.78	0.233	0.991	0.81	0.85	0.5	0.39	1.06	0.78	0.89	0.53	0.33	1.0569	0.9246	97.9	0.0332		0	0.9412	96.3	0.0253		0	0.1056	14.3	0.0437	low similarity	1	0.8409	87.7	0.0049		0
810	91	O-CHLOROPHENOL	Heptane	000095-57-8	C6H5ClO	dry/wet	0.845	0.742	1.342	0.691	1.635	1.361	0.828	0.402	0.16	0.859	0.84	0.84	0.33	0.3	0.9	0.87	0.89	0.41	0.27	0.8975	0.7172	65.2	0.0102		0	0.6552	47.3	0.0025		0	0	0	0.0044	out of domain	2	0.5931	47.9	0.0018		0
811	91	M-CHLOROPHENOL	Heptane	000108-43-0	C6H5ClO	dry/wet	-0.076	-0.833	-0.591	-0.931	-0.108	1.371	0.972	0.937	0.139	0.866	0.91	0.97	0.69	0.33	0.9	0.88	1.08	0.68	0.25	0.8975	0.7602	73.8	0.0104		0	0.8541	79.6	0.0485		0	0.2965	43.9	0.1134	structural outlier	2	0.71	68.9	0.0027		0
812	91	P-CHLOROPHENOL	Heptane	000106-48-9	C6H5ClO	dry/wet	-0.108	-1.061	-0.759	-1.206	-0.266	1.361	1.006	0.93	0.163	0.866	0.94	1.01	0.67	0.38	0.9	0.92	0.92	0.53	0.25	0.8975	0.7256	66.6	0.0271		0	0.7361	60.3	0.0452		0	0.1056	14.3	0.0437	low similarity	1	0.71	68.9	0.0027		0
608	91	3-NITROPHENOL	Heptane	000554-84-7	C6H5NO3	dry/wet	-1.398	-2.282	-2.368	-2.539	-1.829	1.309	1.252	1.042	0.362	0.92	1.05	1.47	0.69	0.49	0.95	1.01	1.48	0.68	0.39	0.9493	0.791	79.8	0.0125		0	0.5722	35.8	0.0515		0	0.2965	43.9	0.1134	structural outlier	2	0.6693	61.1	0.0063		0
619	91	4-NITROPHENOL	Heptane	000100-02-7	C6H5NO3	dry/wet	-2	-2.216	-2.844	-2.472	-2.295	1.371	1.323	1.081	0.413	0.92	1.05	1.47	0.67	0.49	0.95	1.06	1.57	0.53	0.39	0.9493	0.6963	61.7	0.0299		0	0.5353	31.6	0.095	high leverage	1	0.1056	14.3	0.0437	low similarity	1	0.6693	61.1	0.0063		0
50026	91	1-Naphthol	Heptane	000090-15-3	C10H8O1	dry/wet	0.547	0.229	0.277	0.222	0.713	2.066	1.131	0.863	0.243	1.081	1.5	1.23	0.5	0.45	1.14	1.46	1.31	0.41	0.35	1.1441	0.7822	78.1	0.0086		0	0.5044	28.4	0.1128	high leverage	1	0	0	0.0044	out of domain	2	0.5005	33.9	0.0048		0
17	91	ANILINE	Heptane	000062-53-3	C6H7N	dry/wet	-0.137	-0.408	-0.315	-0.648	-0.01	1.357	0.985	0.475	0.297	0.762	0.86	1.08	0.23	0.43	0.82	0.94	1.01	0.27	0.35	0.8162	0.6208	45.7	0.011		0	0.6716	49.8	0.0071		0	0	0	0.012	out of domain	2	0.7438	73.9	0.007		0
817	91	1,3-BENZENEDIOL	Heptane	000108-46-3	C6H6O2	dry/wet	-4.069	-3.673	-4.725	-4.1	-4.044	1.205	1.259	1.684	0.275	0.798	0.99	1.1	1	0.61	0.83	0.92	1.41	1.36	0.45	0.8338	0.7173	65.2	0.0177		0	0.5819	36.9	0.1928	structural outlier	2	0	0	0.4535	out of domain structural outlier	2	0.6223	53.1	0.0054		0
3342	91	2,2-BIS(4-HYDROXYPHENYL)PROPANE	Heptane	000080-05-7	C15H16O2	dry/wet	-1.046	-0.22	-1.839	-0.351	-1.236	2.499	1.726	1.558	0.628	1.73	1.59	1.46	1	0.79	1.86	1.59	1.78	1.06	0.69	1.8643	0.4967	25.8	0.139	high leverage	1	0.4919	27	0.1012	high leverage	1	0	0	0.1747	out of domain structural outlier	2	0	0	0.0803	out of domain	2
630	91	O-METHYLANILINE	Heptane	000095-53-4	C7H9N	dry/wet	0.5	0.361	0.454	0.184	0.72	1.49	0.989	0.403	0.32	0.885	0.88	1.02	0.23	0.43	0.96	0.93	1.03	0.13	0.4	0.9571	0.8483	89.8	0.0124		0	0.6939	53	0.0074		0	0	0	0.1135	out of domain structural outlier	2	0.7469	75	0.0077		0
1168	91	P-METHYLANILINE	Heptane	000106-49-0	C7H9N	dry/wet	0.41	0.361	0.376	0.184	0.629	1.5	0.979	0.44	0.323	0.892	0.88	1.02	0.23	0.43	0.96	0.96	1.03	0.27	0.38	0.9571	0.6645	54.2	0.0091		0	0.6939	53	0.0074		0	0	0	0.012	out of domain	2	0.6953	66.5	0.0078		0
1051	128	METHANE	Octane	000074-82-8	CH4	dry/wet	1.344	1.001	1.43	1.026	1.354	0.516	0.15	0.035	-0.042	0.228	0.11	0.21	0	0.01	0.25	0	0	0	0	0.2495	0	0	0	no fragment overlap	0	0	0	0	no fragment overlap	0	0	0	0	no fragment overlap	0	0	0	0	no fragment overlap	0
316	128	2-METHYLPROPANE	Octane	000075-28-5	C4H10	dry/wet	3.383	2.673	3.372	2.565	3.25	0.773	0.127	0.044	-0.043	0.618	0.01	0.17	0	0.06	0.67	0	0	0	0	0.6722	0	0	0	no fragment overlap	0	0	0	0	no fragment overlap	0	0	0	0	no fragment overlap	0	0	0	0	no fragment overlap	0
134	128	PENTANE	Octane	000109-66-0	C5H12	dry/wet	4.05	3.398	4.125	3.361	3.995	0.876	0.106	0.049	-0.06	0.747	0	0.19	0	0.04	0.81	0	0	0	0	0.8131	0	0	0	no fragment overlap	0	0	0	0	no fragment overlap	0	0	0	0	no fragment overlap	0	0	0	0	no fragment overlap	0
89	128	HEXANE	Octane	000110-54-3	C6H14	dry/wet	4.68	4.013	4.74	3.974	4.595	0.98	0.097	0.055	-0.055	0.875	0	0.19	0	0.04	0.95	0	0	0	0	0.954	0	0	0	no fragment overlap	0	0	0	0	no fragment overlap	0	0	0	0	no fragment overlap	0	0	0	0	no fragment overlap	0
91	128	HEPTANE	Octane	000142-82-5	C7H16	dry/wet	5.33	4.626	5.314	4.586	5.167	1.105	0.122	0.055	-0.049	1	0	0.2	0	0.05	1.09	0	0	0	0	1.0949	0	0	0	no fragment overlap	0	0	0	0	no fragment overlap	0	0	0	0	no fragment overlap	0	0	0	0	no fragment overlap	0
74	128	2,4-DIMETHYLPENTANE	Octane	000108-08-7	C7H16	dry/wet	5.11	4.408	4.923	4.222	4.74	1.061	0.115	0.06	0.017	0.995	0.02	0.16	0	0.1	1.09	0	0	0	0	1.0949	0	0	0	no fragment overlap	0	0	0	0	no fragment overlap	0	0	0	0	no fragment overlap	0	0	0	0	no fragment overlap	0
128	128	OCTANE	Octane	000111-65-9	C8H18	dry/wet	6.01	5.242	6.004	5.2	5.847	1.191	0.126	0.058	-0.057	1.135	0	0.2	0	0.05	1.24	0	0	0	0	1.2358	0	0	0	no fragment overlap	0	0	0	0	no fragment overlap	0	0	0	0	no fragment overlap	0	0	0	0	no fragment overlap	0
1283	128	2,5-DIMETHYLHEXANE	Octane	000592-13-2	C8H18	dry/wet	5.56	5.023	5.584	4.835	5.397	1.155	0.133	0.062	0.01	1.128	0.02	0.17	0	0.1	1.24	0	0	0	0	1.2358	0	0	0	no fragment overlap	0	0	0	0	no fragment overlap	0	0	0	0	no fragment overlap	0	0	0	0	no fragment overlap	0
398	128	NONANE	Octane	000111-84-2	C9H20	dry/wet	6.54	5.852	6.569	5.806	6.411	1.328	0.153	0.058	-0.05	1.258	-0.01	0.2	0	0.05	1.38	0	0	0	0	1.3767	0	0	0	no fragment overlap	0	0	0	0	no fragment overlap	0	0	0	0	no fragment overlap	0	0	0	0	no fragment overlap	0
401	128	ETHYLCYCLOHEXANE	Octane	001678-91-7	C8H16	dry/wet	5.52	4.753	5.236	4.747	5.086	1.189	0.18	0.044	-0.003	1.035	0.22	0.27	0	0.05	1.13	0.26	0.18	0	0	1.1272	0.6786	58.3	0.003		0	0.5193	29.6	0.0021		0	0	0	0	no fragment overlap	0	0	0	0	no fragment overlap	0
1053	128	ETHYLENE	Octane	000074-85-1	C2H4	dry/wet	1.38	1.199	1.311	1.09	1.253	0.621	0.325	0.044	0.022	0.329	0.1	0.19	0	0.07	0.35	0.12	0.11	0	0.07	0.3474	0.5931	40.1	0.0018		0	0.3517	14.4	0.0009	low similarity	1	0	0	0	no fragment overlap	0	0.6727	62.8	0.002		0
1055	128	PROPYLENE	Octane	000115-07-1	C3H6	dry/wet	2.226	1.702	1.936	1.583	1.866	0.74	0.33	0.039	0.029	0.456	0.13	0.24	0	0.08	0.49	0.12	0.11	0	0.07	0.4883	0.5931	40.1	0.0018		0	0.3517	14.4	0.0009	low similarity	1	0	0	0	no fragment overlap	0	0.6727	62.8	0.002		0
368	128	1-BUTENE	Octane	000106-98-9	C4H8	dry/wet	2.806	2.315	2.592	2.195	2.508	0.849	0.318	0.041	0.031	0.585	0.13	0.24	0	0.09	0.63	0.12	0.11	0	0.07	0.6292	0.5931	40.1	0.0018		0	0.3517	14.4	0.0009	low similarity	1	0	0	0	no fragment overlap	0	0.6727	62.8	0.002		0
457	128	ISOBUTYLENE	Octane	000115-11-7	C4H8	dry/wet	2.63	2.315	2.411	2.127	2.326	0.859	0.34	0.043	0.055	0.58	0.11	0.18	0	0.1	0.63	0.18	0.11	0	0.07	0.6292	0.4198	17.1	0.0718	low similarity	1	0.3517	14.4	0.0009	low similarity	1	0	0	0	no fragment overlap	0	0.6727	62.8	0.002		0
257	128	1-PENTENE	Octane	000109-67-1	C5H10	dry/wet	3.5	2.93	3.225	2.808	3.126	0.95	0.307	0.046	0.036	0.716	0.13	0.24	0	0.09	0.77	0.12	0.11	0	0.07	0.7701	0.5931	40.1	0.0018		0	0.3517	14.4	0.0009	low similarity	1	0	0	0	no fragment overlap	0	0.6727	62.8	0.002		0
356	128	3-METHYL-1-BUTENE	Octane	000563-45-1	C5H10	dry/wet	3.48	2.821	3.055	2.626	2.943	0.928	0.311	0.045	0.06	0.709	0.13	0.23	0	0.12	0.77	0.12	0.11	0	0.07	0.7701	0.5931	40.1	0.0018		0	0.3517	14.4	0.0009	low similarity	1	0	0	0	no fragment overlap	0	0.6727	62.8	0.002		0
98	128	2-METHYL-1,3-BUTADIENE	Octane	000078-79-5	C5H8	dry/wet	2.83	2.461	2.48	2.186	2.433	1.114	0.473	0.062	0.105	0.678	0.23	0.24	0	0.16	0.73	0.36	0.23	0	0.14	0.7271	0.4882	24.5	0.3453	structural outlier	2	0.746	61.9	0.0037		0	0	0	0	no fragment overlap	0	0.7461	74.9	0.0081		0
1014	128	TETRAFLUOROMETHANE[R14]	Octane	000075-73-0	CF4	dry/wet	1.759	1.418	2.762	1.329	2.554	-0.006	-0.061	0.046	-0.133	0.426	-0.47	-0.03	0	0	0.32	-0.49	-0.42	0	0	0.3203	0.6313	47.7	0.2027	high leverage	1	0.0106	0.1	0.2389	out of domain structural outlier	2	0	0	0	no fragment overlap	0	0	0	0	no fragment overlap	0
47	128	CHLOROFORM	Octane	000067-66-3	CHCl3	dry/wet	1.79	2.001	2.108	2.257	2.121	0.81	0.521	0.172	0.005	0.629	0.34	0.48	0.12	0	0.62	0.39	0.45	0	0	0.6167	0.6073	43.5	0.0197		0	0.578	36.6	0.0035		0	0	0	0	no fragment overlap	0	0	0	0	no fragment overlap	0
157	128	TETRACHLOROMETHANE	Octane	000056-23-5	CCl4	dry/wet	3.11	2.93	3.61	3.19	3.525	0.926	0.298	0.067	-0.016	0.759	0.42	0.55	0	0	0.74	0.52	0.6	0	0	0.7391	0.4857	24.2	0.0349	low similarity	1	0.6167	41.8	0.0062		0	0	0	0	no fragment overlap	0	0	0	0	no fragment overlap	0
332	128	1-CHLOROPROPANE	Octane	000540-54-5	C3H7Cl	dry/wet	2.12	2.571	2.142	2.622	2.057	0.8	0.451	0.051	0.094	0.619	0.13	0.32	0	0.03	0.65	0.2	0.32	0	0	0.6537	0.7377	69.2	0.0066		0	0.7947	71.2	0.0103		0	0	0	0	no fragment overlap	0	0	0	0	no fragment overlap	0
30856	128	ETHYLBROMIDE	Octane	000074-96-4	C2H5Br	dry/wet	1.65	2.169	1.633	2.271	1.578	0.817	0.494	0.055	0.103	0.533	0.31	0.4	0	0.03	0.57	0.34	0.39	0	0.09	0.5654	0.8018	81.2	0.019		0	0.9742	99	0.0263		0	0	0	0	no fragment overlap	0	0.8791	91	0.0371		0
245	128	DICHLORODIFLUOROMETHANE[R12]	Octane	000075-71-8	CCl2F2	dry/wet	2.43	2.176	3.18	2.261	3.019	0.456	0.06	0.071	-0.068	0.589	-0.02	0.26	0	0	0.53	0	0.3	0	0	0.5297	0.6278	46.9	0.1036		0	0.5926	38.2	0.0015		0	0	0	0	no fragment overlap	0	0	0	0	no fragment overlap	0
446	128	CHLOROTRIFLUOROMETHANE	Octane	000075-72-9	CClF3	dry/wet	2.04	1.797	2.943	1.795	2.751	0.221	-0.025	0.066	-0.094	0.506	-0.24	0.12	0	0	0.42	-0.24	0.05	0	0	0.425	0.5076	27.4	0.0703		0	0.5444	32.6	0.0153		0	0	0	0	no fragment overlap	0	0	0	0	no fragment overlap	0
12	128	DIETHYLETHER	Octane	000060-29-7	C4H10O	dry/wet	0.945	1.747	1.804	1.299	1.592	0.764	0.367	0.029	0.262	0.69	0.04	0.34	0	0.25	0.73	0	0.26	0	0.51	0.7309	0	0	0	no fragment overlap	0	0.7658	66.6	0.0255		0	0	0	0	no fragment overlap	0	0	0	0.3439	out of domain structural outlier	2
57	128	DIBUTYLETHER	Octane	000142-96-1	C8H18O	dry/wet	3.55	4.201	4.308	3.744	4.061	1.189	0.394	0.035	0.266	1.202	0.04	0.35	0	0.26	1.29	0	0.18	0	0.41	1.2945	0	0	0	no fragment overlap	0	0.7709	68	0.0121		0	0	0	0	no fragment overlap	0	0.7666	78.4	0.0424		0
399	128	PROPANAL	Octane	000123-38-6	C3H6O	dry/wet	-0.66	0.028	-0.12	-0.385	-0.301	0.605	0.633	0.025	0.386	0.52	0.24	0.73	0	0.32	0.55	0.17	0.63	0	0.46	0.547	0.4992	26	0.0159		0	0.9083	90.7	0.0221		0	0	0	0	no fragment overlap	0	0.9763	100	0.1445	high leverage	1
313	128	BUTANAL	Octane	000123-72-8	C4H8O	dry/wet	0.04	0.643	0.472	0.229	0.283	0.714	0.641	0.025	0.391	0.644	0.24	0.73	0	0.32	0.69	0.17	0.63	0	0.46	0.6879	0.4992	26	0.0159		0	0.9083	90.7	0.0221		0	0	0	0	no fragment overlap	0	0.9763	100	0.1445	high leverage	1
753	128	PENTANAL	Octane	000110-62-3	C5H10O	dry/wet	0.69	1.256	1.111	0.841	0.909	0.823	0.654	0.022	0.398	0.78	0.23	0.74	0	0.33	0.83	0.17	0.63	0	0.46	0.8288	0.4992	26	0.0159		0	0.9083	90.7	0.0221		0	0	0	0	no fragment overlap	0	0.9763	100	0.1445	high leverage	1
754	128	HEXANAL	Octane	000066-25-1	C6H12O	dry/wet	1.43	1.872	1.761	1.455	1.548	0.906	0.651	0.026	0.392	0.907	0.23	0.74	0	0.33	0.97	0.17	0.63	0	0.46	0.9697	0.4992	26	0.0159		0	0.9083	90.7	0.0221		0	0	0	0	no fragment overlap	0	0.9763	100	0.1445	high leverage	1
4	128	ACETONE	Octane	000067-64-1	C3H6O	dry/wet	-0.98	0.027	-0.832	-0.453	-1.023	0.63	0.712	0.046	0.485	0.515	0.22	0.67	0	0.34	0.55	0.12	0.64	0	0.5	0.547	0.5931	40.1	0.0018		0	0.6565	47.5	0.0268		0	0	0	0	no fragment overlap	0	0.334	13	0.0452	low similarity	1
40	128	2-BUTANONE	Octane	000078-93-3	C4H8O	dry/wet	-0.35	0.642	0.054	0.16	-0.162	0.692	0.668	0.033	0.461	0.649	0.21	0.67	0	0.34	0.69	0.12	0.63	0	0.48	0.6879	0.5931	40.1	0.0018		0	0.891	87.7	0.0084		0	0	0	0	no fragment overlap	0	0.4432	25.5	0.0579		0
137	128	2-PENTANONE	Octane	000107-87-9	C5H10O	dry/wet	0.26	1.256	0.636	0.772	0.418	0.813	0.68	0.037	0.462	0.769	0.21	0.68	0	0.34	0.83	0.12	0.63	0	0.5	0.8288	0.5931	40.1	0.0018		0	0.891	87.7	0.0084		0	0	0	0	no fragment overlap	0	0.9604	99	0.0156		0
117	128	4-METHYL-2-PENTANONE	Octane	000108-10-1	C6H12O	dry/wet	0.94	1.761	1.3	1.203	1.06	0.896	0.65	0.042	0.463	0.898	0.22	0.67	0	0.37	0.97	0.12	0.63	0	0.39	0.9697	0.5931	40.1	0.0018		0	0.891	87.7	0.0084		0	0	0	0	no fragment overlap	0	0.5731	45.1	0.0115		0
616	128	METHYLBUTYLKETONE	Octane	000591-78-6	C6H12O	dry/wet	0.962	1.871	1.289	1.386	1.054	0.903	0.681	0.035	0.467	0.905	0.21	0.68	0	0.35	0.97	0.12	0.63	0	0.5	0.9697	0.5931	40.1	0.0018		0	0.891	87.7	0.0084		0	0	0	0	no fragment overlap	0	0.9604	99	0.0156		0
92	128	2-HEPTANONE	Octane	000110-43-0	C7H14O	dry/wet	1.598	2.485	1.908	1.998	1.672	1.022	0.696	0.039	0.463	1.029	0.21	0.69	0	0.35	1.11	0.08	0.63	0	0.5	1.1106	0.3755	14	0.0344	low similarity	1	0.891	87.7	0.0084		0	0	0	0	no fragment overlap	0	0.9604	99	0.0156		0
662	128	3,3-DIMETHYL-2-BUTANONE	Octane	000075-97-8	C6H12O	dry/wet	0.806	1.797	1.024	1.198	0.756	0.88	0.639	0.039	0.514	0.89	0.2	0.62	0	0.38	0.97	0.12	0.47	0	0.39	0.9697	0.5931	40.1	0.0018		0	0.7539	63.8	0.0068		0	0	0	0	no fragment overlap	0	0.5731	45.1	0.0115		0
82	128	METHYLACETATE	Octane	000079-20-9	C3H6O2	dry/wet	-0.189	0.241	-0.423	-0.348	-0.607	0.57	0.757	0.044	0.446	0.585	0.07	0.57	0	0.36	0.61	0.11	0.61	0	0.4	0.6057	0.631	47.6	0.0298		0	0.6969	53.3	0.0096		0	0	0	0	no fragment overlap	0	0.5298	38.1	0.0225		0
21	128	ETHYLACETATE	Octane	000141-78-6	C4H8O2	dry/wet	0.33	0.851	0.215	0.257	0.001	0.667	0.735	0.033	0.464	0.716	0.07	0.58	0	0.36	0.75	0.07	0.62	0	0.48	0.7466	0.8503	90.3	0.0205		0	0.7051	54.7	0.0219		0	0	0	0	no fragment overlap	0	0.7374	72.8	0.0319		0
80	128	BUTYLACETATE	Octane	000123-86-4	C6H12O2	dry/wet	1.651	2.075	1.686	1.478	1.448	0.85	0.703	0.033	0.437	0.973	0.06	0.59	0	0.37	1.03	0.07	0.57	0	0.46	1.0284	0.8503	90.3	0.0205		0	0.9448	96.5	0.0095		0	0	0	0	no fragment overlap	0	0.8152	85.1	0.0324		0
400	128	METHYLPROPIONATE	Octane	000554-12-1	C4H8O2	dry/wet	0.469	0.851	0.169	0.257	-0.049	0.653	0.734	0.033	0.469	0.713	0.07	0.58	0	0.36	0.75	0.09	0.6	0	0.44	0.7466	0.4929	25.2	0.0079		0	0.9361	95.5	0.0047		0	0	0	0	no fragment overlap	0	0.4969	33.4	0.0519		0
371	128	ETHYLBUTYRATE	Octane	000105-54-4	C6H12O2	dry/wet	1.61	2.075	1.633	1.478	1.393	0.879	0.711	0.024	0.452	0.97	0.06	0.59	0	0.37	1.03	0.05	0.61	0	0.46	1.0284	0.5959	41.3	0.0029		0	0.9213	92.8	0.0156		0	0	0	0	no fragment overlap	0	0.9371	95.8	0.0588		0
216	128	METHYLPENTANOATE	Octane	000624-24-8	C6H12O2	dry/wet	1.678	2.075	1.606	1.478	1.383	0.87	0.744	0.032	0.439	0.969	0.06	0.59	0	0.37	1.03	0.09	0.6	0	0.46	1.0284	0.4929	25.2	0.0079		0	0.9361	95.5	0.0047		0	0	0	0	no fragment overlap	0	0.9413	96.8	0.0122		0
686	128	METHYLCAPROATE	Octane	000106-70-7	C7H14O2	dry/wet	2.235	2.69	2.226	2.092	2.002	0.997	0.764	0.032	0.438	1.094	0.06	0.59	0	0.37	1.17	0.05	0.6	0	0.46	1.1693	0.411	16.5	0.0404	low similarity	1	0.9361	95.5	0.0047		0	0	0	0	no fragment overlap	0	0.9413	96.8	0.0122		0
3	128	ACETONITRILE	Octane	000075-05-8	C2H3N	dry/wet	-1.26	-0.043	-1.544	-0.185	-1.642	0.504	0.837	0.106	0.417	0.391	0.19	0.72	0	0.2	0.4	0.17	0.56	0.05	0.18	0.4042	0.8597	91.7	0.0113		0	0.2974	9.7	0.0109	low similarity	1	0.2134	32.2	0.011		0	0.4544	26.8	0.0194		0
326	128	PROPIONITRILE	Octane	000107-12-0	C3H5N	dry/wet	-0.74	0.572	-0.654	0.429	-0.802	0.598	0.767	0.06	0.422	0.519	0.19	0.73	0	0.2	0.55	0.17	0.56	0.05	0.3	0.5451	0.8597	91.7	0.0113		0	0.2974	9.7	0.0109	low similarity	1	0.2134	32.2	0.011		0	0.7429	73.4	0.0382		0
320	128	ETHYLAMINE	Octane	000075-04-7	C2H7N	dry/wet	-1.796	-1.878	-1.197	-2.916	-1.387	0.674	0.366	0.276	0.46	0.451	0.21	0.49	0.21	0.57	0.49	0.26	0.32	0.17	0.56	0.4902	0.558	33.7	0.0112		0	0.6992	53.5	0.0019		0	0.8347	87.5	0.0271		0	0.7619	77.9	0.0238		0
377	128	PROPYLAMINE	Octane	000107-10-8	C3H9N	dry/wet	-1.022	-1.263	-0.363	-2.303	-0.566	0.752	0.333	0.276	0.433	0.582	0.2	0.5	0.21	0.58	0.63	0.26	0.32	0.17	0.56	0.6311	0.558	33.7	0.0112		0	0.6992	53.5	0.0019		0	0.8347	87.5	0.0271		0	0.7619	77.9	0.0238		0
240	128	BUTYLAMINE	Octane	000109-73-9	C4H11N	dry/wet	-0.585	-0.65	0.248	-1.691	0.034	0.85	0.338	0.278	0.437	0.711	0.2	0.5	0.21	0.58	0.77	0.2	0.32	0.17	0.56	0.772	0.7765	76.4	0.0252		0	0.6992	53.5	0.0019		0	0.8347	87.5	0.0271		0	0.7619	77.9	0.0238		0
126	128	1-NITROPROPANE	Octane	000108-03-2	C3H7NO2	dry/wet	0.445	1.123	0.348	0.88	0.232	0.675	0.826	0.071	0.351	0.68	0.22	0.72	0	0.25	0.71	0.24	0.54	0	0.29	0.7055	0.7412	70.2	0.0041		0	0.1849	3.8	0.0036	out of domain	2	0	0	0	no fragment overlap	0	0.8163	85.2	0.0793		0
110	128	METHANOL	Octane	000067-56-1	CH4O	dry/wet	-2.68	-1.601	-2.997	-1.996	-2.998	0.473	0.549	0.586	0.378	0.295	0.21	0.44	0.31	0.3	0.31	0.19	0.28	0.31	0.2	0.3082	0.0194	1.9	0.0022	out of domain	2	0.2446	7.5	0.0017	low similarity	1	0	0	0.0086	out of domain	2	0	0	0.0014	out of domain	2
11	128	ETHANOL	Octane	000064-17-5	C2H6O	dry/wet	-2.07	-0.986	-2.293	-1.382	-2.328	0.564	0.522	0.562	0.391	0.424	0.21	0.45	0.31	0.31	0.45	0.19	0.37	0.33	0.33	0.4491	0.0194	1.9	0.0022	out of domain	2	0.8374	76.4	0.0078		0	0.296	43.7	0.034		0	0.3233	12.3	0.0151	low similarity	1
140	128	1-PROPANOL	Octane	000071-23-8	C3H8O	dry/wet	-1.43	-0.372	-1.628	-0.77	-1.692	0.643	0.538	0.528	0.406	0.556	0.21	0.45	0.31	0.31	0.59	0.19	0.37	0.33	0.39	0.59	0.0194	1.9	0.0022	out of domain	2	0.8374	76.4	0.0078		0	0.296	43.7	0.034		0	0.3558	14.6	0.0213	low similarity	1
39	128	1-BUTANOL	Octane	000071-36-3	C4H10O	dry/wet	-0.81	0.243	-1.117	-0.157	-1.185	0.75	0.524	0.567	0.409	0.682	0.2	0.46	0.31	0.31	0.73	0.19	0.37	0.36	0.47	0.7309	0.0194	1.9	0.0022	out of domain	2	0.8374	76.4	0.0078		0	0.4208	54.5	0.0196		0	0.9246	94.4	0.0188		0
120	128	2-METHYL-1-PROPANOL	Octane	000078-83-1	C4H10O	dry/wet	-0.858	0.134	-0.828	-0.339	-0.875	0.756	0.523	0.552	0.358	0.676	0.21	0.44	0.31	0.34	0.73	0.19	0.37	0.27	0.33	0.7309	0.0194	1.9	0.0022	out of domain	2	0.8374	76.4	0.0078		0	0.6981	79.2	0.0972	high leverage	1	0.3233	12.3	0.0151	low similarity	1
22	128	2-BUTANOL	Octane	000078-92-2	C4H10O	dry/wet	-1.002	0.134	-0.665	-0.339	-0.735	0.743	0.517	0.503	0.365	0.682	0.21	0.44	0.31	0.34	0.73	0.19	0.28	0.31	0.51	0.7309	0.0194	1.9	0.0022	out of domain	2	0.2446	7.5	0.0017	low similarity	1	0	0	0.0086	out of domain	2	0.7584	77.3	0.0354		0
136	128	1-PENTANOL	Octane	000071-41-0	C5H12O	dry/wet	-0.222	0.858	-0.422	0.456	-0.495	0.841	0.536	0.566	0.398	0.814	0.2	0.46	0.31	0.32	0.87	0.19	0.47	0.36	0.47	0.8718	0.0194	1.9	0.0022	out of domain	2	0.8971	89.3	0.0182		0	0.4208	54.5	0.0196		0	0.9246	94.4	0.0188		0
266	128	3-METHYL-1-BUTANOL<ISOPENTANOL>	Octane	000123-51-3	C5H12O	dry/wet	-0.32	0.747	-0.648	0.273	-0.735	0.834	0.545	0.565	0.435	0.809	0.21	0.44	0.31	0.34	0.87	0.19	0.37	0.33	0.39	0.8718	0.0194	1.9	0.0022	out of domain	2	0.8374	76.4	0.0078		0	0.296	43.7	0.034		0	0.3558	14.6	0.0213	low similarity	1
670	128	TERT-PENTANOL	Octane	000075-85-4	C5H12O	dry/wet	-0.328	0.78	-0.273	0.261	-0.404	0.819	0.493	0.474	0.434	0.804	0.19	0.39	0.31	0.35	0.87	0.19	0.28	0.31	0.61	0.8718	0.0194	1.9	0.0022	out of domain	2	0.2446	7.5	0.0017	low similarity	1	0	0	0.0086	out of domain	2	0.8501	88.4	0.0835		0
[truncated: 1,633 more rows]

## Sheet: Table S2
Table S2 Refitted solvent-water system parameters determined using QCAP solute parameters.
[truncated: 67 more rows]

[truncated: 10 more sheets: Table S3, Table S4, Table S5, Table S6, Table S7, Fig. S1, Fig. S2, Fig. S3, Fig. S4, Discussion]
